# Supplementary material for: Condensin II Regulates Interphase Chromatin Organization Through the Mrg-Binding Motif of Cap-H2
Source: Oxford University Press journal article supplement (doi:10.1534/g3.115.016634), 2015-03-10
Supplement: 016634_016634si.pdf [file 016634_016634si.pdf]

**Condensin II regulates interphase chromatin organization through the Mrg-binding motif of Cap-H2.**

Heather A. Wallace<sup>1</sup>, Joseph E. Klebba<sup>2, 3</sup>, Thomas Kusch<sup>4</sup>, Gregory C. Rogers<sup>2</sup> and Giovanni Bosco<sup>1, †</sup>

<sup>1</sup>Department of Genetics, Geisel School of Medicine at Dartmouth, Hanover, NH 03755, USA

<sup>2</sup>Department of Cellular and Molecular Medicine, University of Arizona Cancer Center, Tucson, AZ 85721, USA

<sup>3</sup>Present address: UCSF School of Medicine, San Francisco, CA 94143, USA

<sup>4</sup>249 McAuliffe Ct, Somerset, NJ 08873, USA

† Author for correspondence (Giovanni.Bosco@Dartmouth.edu)

**DOI: 10.1534/g3.115.016634**

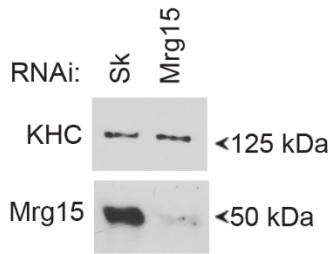

**Figure S1 Confirmation of guinea pig anti-Mrg15 antibody specificity.** Lysates from Kc cells treated with non-targeting control (SK) or Mrg15 dsRNA immunoblotted for anti-Mrg15. Anti-KHC (Kinesin Heavy Chain) was used as a loading control.

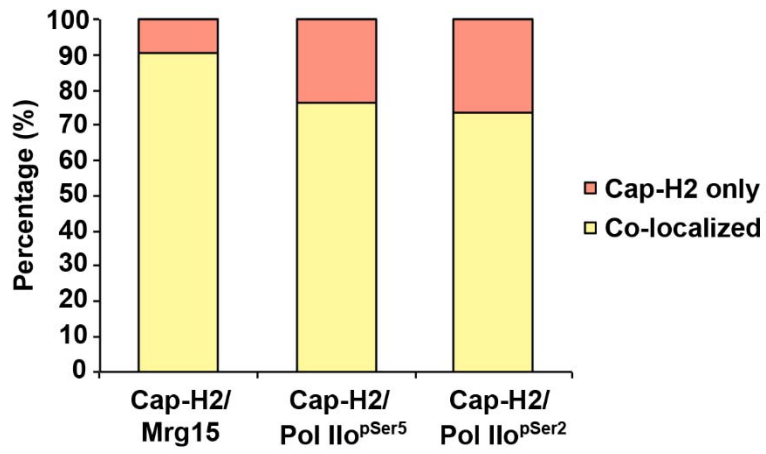

**Figure S2** Quantification of percentage of co-localization between Cap-H2 and Mrg15, Pol Ilo<sup>pSer5</sup>, or Pol Ilo<sup>pSer2</sup> polytene immunostaining signals shown in Figures 1 and 2.

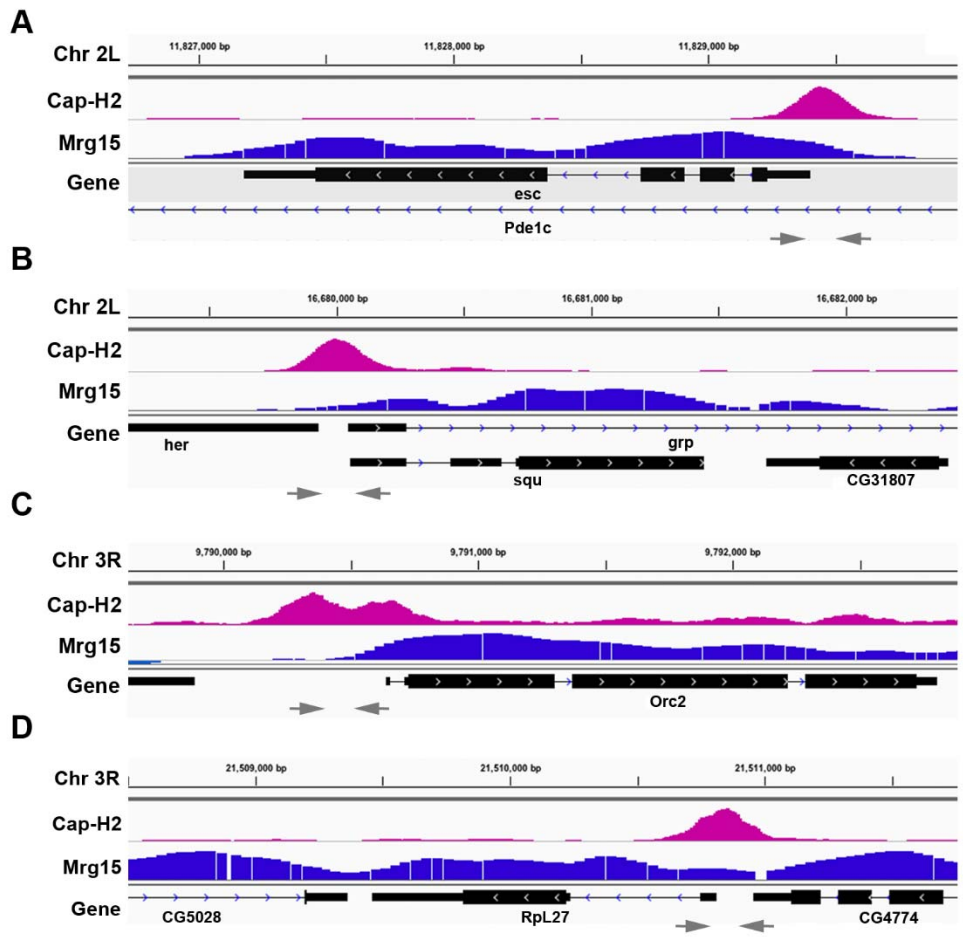

**Figure S3** Cap-H2 ChIP-seq peak regions validated by ChIP-qPCR. (A-D) Integrated Genome Viewer (IGV) screenshot of ChIP-seq peaks for Cap-H2 and Mrg15 in regions near *Esc* (A), *squ* (B), *Orc2* (C), and *RpL27* (D) validated by ChIP-qPCR in Figure 2B. Grey arrows indicate the region that was amplified by qPCR.

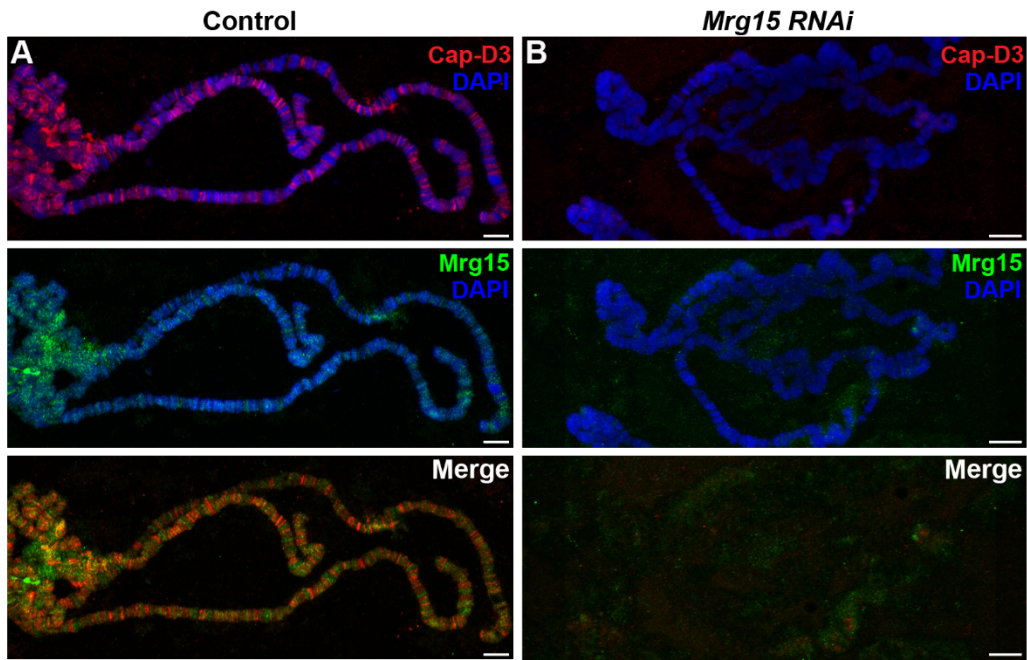

**Figure S4** *Mrg15* is required for Cap-D3 localization at interband regions on polytene chromosomes. (A-B) Salivary gland polytene chromosomes from wild type larvae stained for Cap-D3 (red), *Mrg15* (green), and DNA (blue) as indicated. Scale bar, 10  $\mu\text{m}$ .

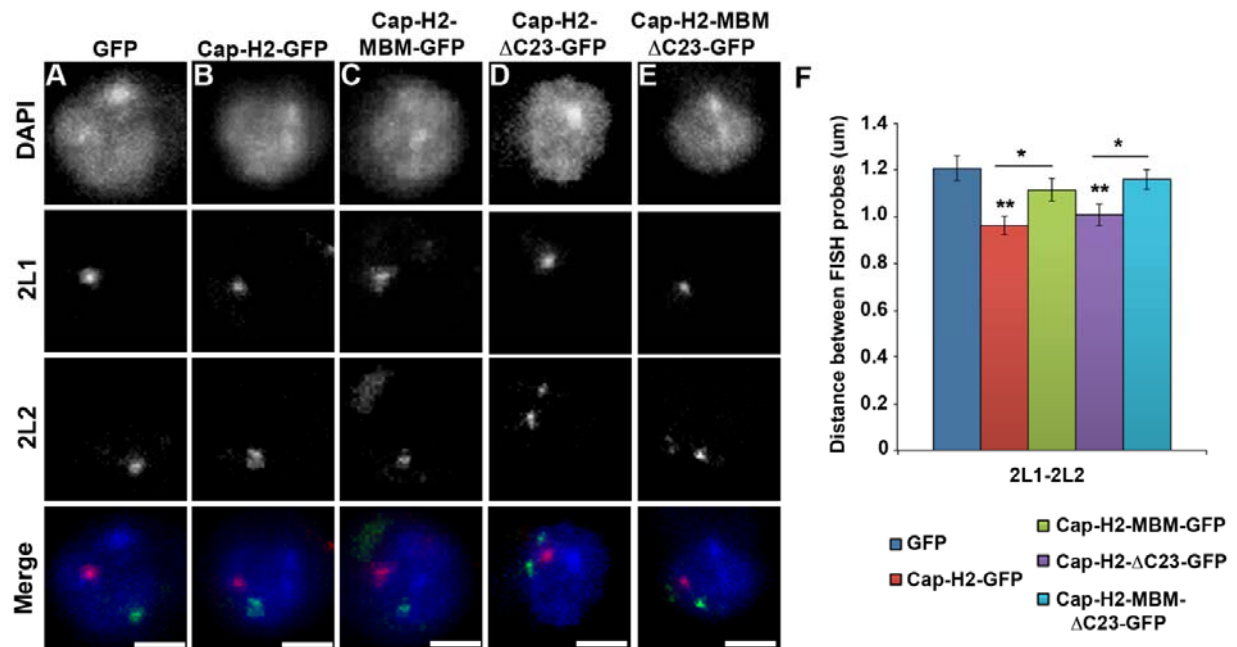

**Figure S5 Mrg-binding motif is required for Cap-H2-mediated axial compaction.** (A-E) Kc cells transiently expressing EGFP (A), Cap-H2-EGFP (B), Cap-H2-MBM-EGFP (C), Cap-H2- $\Delta$ C23-EGFP (D), or Cap-H2- $\Delta$ C23-MBM-EGFP (E) labeled with FISH probes for two chromosome 2L loci, chromosome 2L probe 1 (2L1, red) and chromosome 2L probe 2 (2L2, green). Scale bar, 2.5  $\mu$ m. (F) Pairwise distances were measured for 2L1-2L2 FISH probes (n = 60). \* $p$ <0.05, \*\* $p$ <0.01, two-tailed student's t test. P-values correspond to statistical significance relative to control, except where indicated by horizontal lines. Asterisks located above horizontal black line indicate significance between cells expressing Cap-H2-EGFP or Cap-H2- $\Delta$ C23-EGFP and the corresponding MBM mutant. Error bars, s.e.m.

**Table S1. Primers used for RNAi and qPCR.**

| Gene         | Primer sequences                                                         |
|--------------|--------------------------------------------------------------------------|
| <i>RpL49</i> | 5'-CTTGGGAAATCTGTTAGTTTTAGCCAAA-3'<br>5'-T TACTGGAATCCTTTGGTTTATCTGCT-3' |
| <i>Esc</i>   | 5'-CCCGAGTTCATCACAAGAT-3'<br>5'-CTGTGTATATCCCGC GTT GAA-3'               |
| <i>squ</i>   | 5'- CCCGAAGTAAAACCACCAGA-3'<br>5'- ATTCTTCGTTCCGGGAATCT-3'               |
| <i>Orc2</i>  | 5'-AGTCCATGGATCAGCCAAAG-3'<br>5'- GGAAATCGCTTTCATCTCCAG-3'               |
| <i>RpL27</i> | 5'-GCACGACATCAGCTTTGAGA-3'<br>5'-CCTCCTTG TAGACGGACTCG-3'                |

**File S1**

**Raw data file**

Available for download as an Excel file at <http://www.g3journal.org/lookup/suppl/doi:10.1534/g3.115.016634/-/DC1>
