# Supplementary material for: Condensin II Regulates Interphase Chromatin Organization Through the Mrg-Binding Motif of Cap-H2
Source: Oxford University Press journal article supplement (doi:10.1534/g3.115.016634), 2015-03-10
Supplement: 016634_figures1.pdf [file 016634_figures1.pdf]

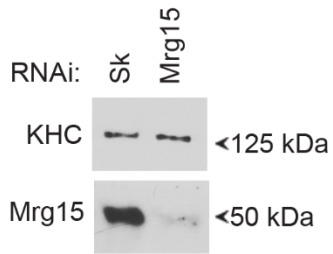

**Figure S1 Confirmation of guinea pig anti-Mrg15 antibody specificity.** Lysates from Kc cells treated with non-targeting control (SK) or Mrg15 dsRNA immunoblotted for anti-Mrg15. Anti-KHC (Kinesin Heavy Chain) was used as a loading control.
