# Supplementary material for: Condensin II Regulates Interphase Chromatin Organization Through the Mrg-Binding Motif of Cap-H2
Source: Oxford University Press journal article supplement (doi:10.1534/g3.115.016634), 2015-03-10
Supplement: 016634_figures2.pdf [file 016634_figures2.pdf]

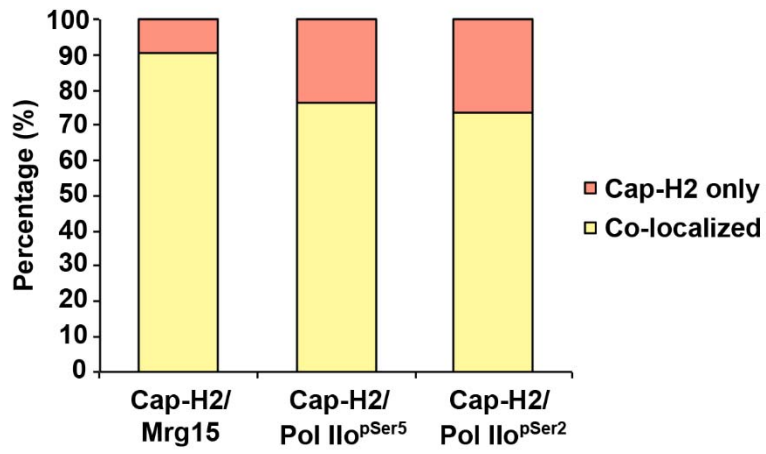

**Figure S2** Quantification of percentage of co-localization between Cap-H2 and Mrg15, Pol Ilo<sup>pSer5</sup>, or Pol Ilo<sup>pSer2</sup> polytene immunostaining signals shown in Figures 1 and 2.
