# Supplementary material for: Condensin II Regulates Interphase Chromatin Organization Through the Mrg-Binding Motif of Cap-H2
Source: Oxford University Press journal article supplement (doi:10.1534/g3.115.016634), 2015-03-10
Supplement: 016634_figures3.pdf [file 016634_figures3.pdf]

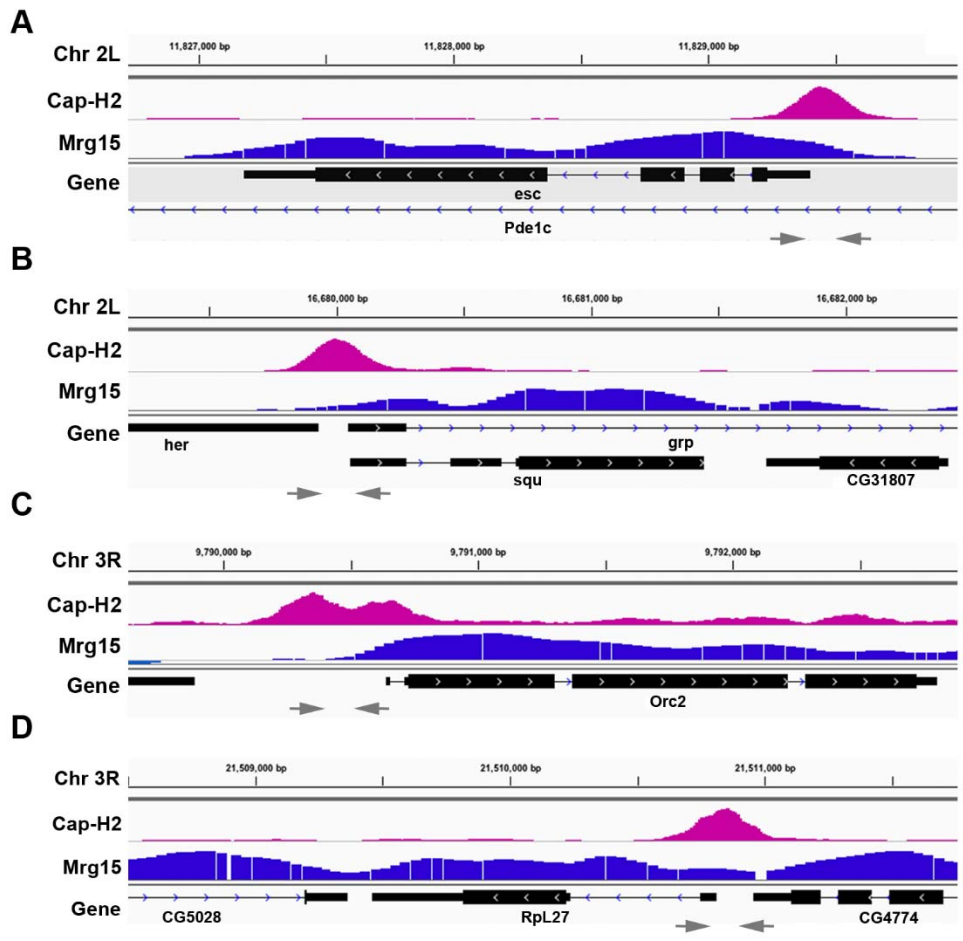

**Figure S3** Cap-H2 ChIP-seq peak regions validated by ChIP-qPCR. (A-D) Integrated Genome Viewer (IGV) screenshot of ChIP-seq peaks for Cap-H2 and Mrg15 in regions near *Esc* (A), *squ* (B), *Orc2* (C), and *RpL27* (D) validated by ChIP-qPCR in Figure 2B. Grey arrows indicate the region that was amplified by qPCR.
