# Supplementary material for: Condensin II Regulates Interphase Chromatin Organization Through the Mrg-Binding Motif of Cap-H2
Source: Oxford University Press journal article supplement (doi:10.1534/g3.115.016634), 2015-03-10
Supplement: 016634_figures4.pdf [file 016634_figures4.pdf]

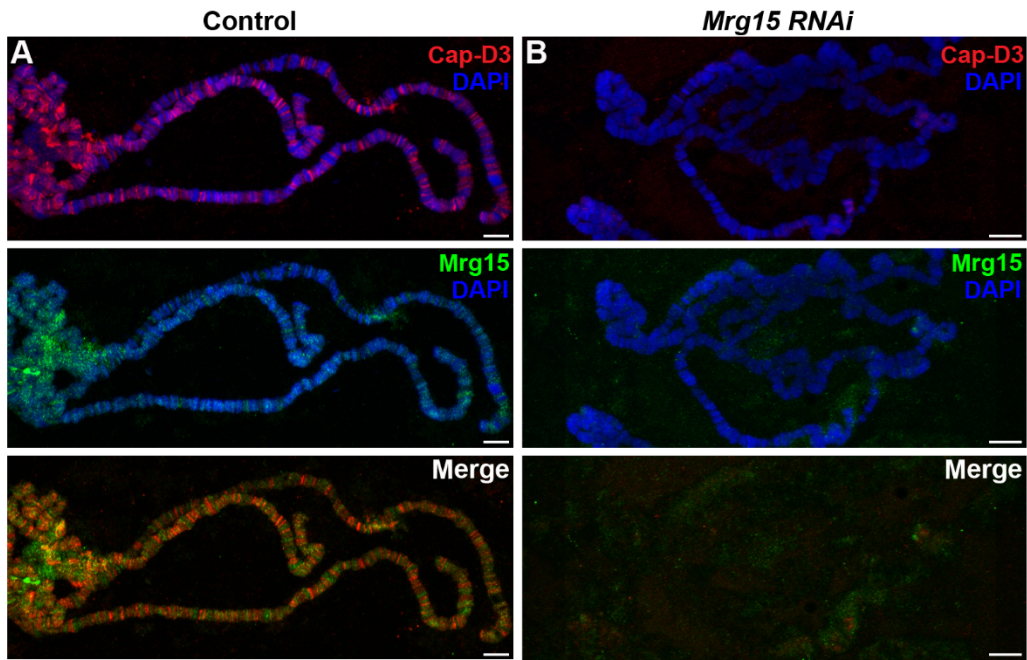

**Figure S4** *Mrg15* is required for Cap-D3 localization at interband regions on polytene chromosomes. (A-B) Salivary gland polytene chromosomes from wild type larvae stained for Cap-D3 (red), *Mrg15* (green), and DNA (blue) as indicated. Scale bar, 10  $\mu\text{m}$ .
