# Supplementary material for: Condensin II Regulates Interphase Chromatin Organization Through the Mrg-Binding Motif of Cap-H2
Source: Oxford University Press journal article supplement (doi:10.1534/g3.115.016634), 2015-03-10
Supplement: 016634_files1.xlsx [file 016634_files1.xlsx]

## Sheet: Figure 3D measurements
Replicate 1
Control		Image/Channel	Mean Intensity	Background subtracted values	Ratio	Average ratio wild type control	Cap-H20019		Image/Channel	Mean Intensity	Background subtracted values	Ratio	Average ratio Cap-H2 mutant	Ratio mutant/wild type	Average ratio all replicates
IF	DAPI	polytene IF_Cap-H2 Cy3 and Mrg15 FITC_60X_003MAXIP8bit.jpg:Blue	6.921	6.393	1	1	IF	DAPI	polytene IF_0019_Cap-H2Cy3 and Mrg15 FITC_60X_005MAXIP8bit.jpg:Blue	12.246	11.869	1	1	1	1
	Mrg15	polytene IF_Cap-H2 Cy3 and Mrg15 FITC_60X_003MAXIP8bit.jpg:Green	11.744	10.318	1.61395	1.51106		Mrg15	polytene IF_0019_Cap-H2Cy3 and Mrg15 FITC_60X_005MAXIP8bit.jpg:Green	8.155	7.646	0.644199	0.610684	0.404142	0.448111
	Cap-H2	polytene IF_Cap-H2 Cy3 and Mrg15 FITC_60X_003MAXIP8bit.jpg:Red	11.262	9.12	1.42656	0.651633		Cap-H2	polytene IF_0019_Cap-H2Cy3 and Mrg15 FITC_60X_005MAXIP8bit.jpg:Red	1.741	1.341	0.112983	0.17394	0.26693	0.407161
Background fluorescence	DAPI	polytene IF_Cap-H2 Cy3 and Mrg15 FITC_60X_003MAXIP8bit.jpg:Blue	0.528				Background fluorescence	DAPI	polytene IF_0019_Cap-H2Cy3 and Mrg15 FITC_60X_005MAXIP8bit.jpg:Blue	0.377
	Mrg15	polytene IF_Cap-H2 Cy3 and Mrg15 FITC_60X_003MAXIP8bit.jpg:Green	1.426					Mrg15	polytene IF_0019_Cap-H2Cy3 and Mrg15 FITC_60X_005MAXIP8bit.jpg:Green	0.509
	Cap-H2	polytene IF_Cap-H2 Cy3 and Mrg15 FITC_60X_003MAXIP8bit.jpg:Red	2.142					Cap-H2	polytene IF_0019_Cap-H2Cy3 and Mrg15 FITC_60X_005MAXIP8bit.jpg:Red	0.4
IF	DAPI	polytene IF_Cap-H2 Cy3 and Mrg15 FITC_60X_003MAXIP8bit.jpg:Blue	4.467	4.006	1		IF	DAPI	polytene IF_0019_Cap-H2Cy3 and Mrg15 FITC_60X_006MAXIP8bit.jpg:Blue	12.145	11.818	1
	Mrg15	polytene IF_Cap-H2 Cy3 and Mrg15 FITC_60X_003MAXIP8bit.jpg:Green	7.122	6.18	1.54269			Mrg15	polytene IF_0019_Cap-H2Cy3 and Mrg15 FITC_60X_006MAXIP8bit.jpg:Green	4.71	4.4	0.372313
	Cap-H2	polytene IF_Cap-H2 Cy3 and Mrg15 FITC_60X_003MAXIP8bit.jpg:Red	3.267	2.266	0.565652			Cap-H2	polytene IF_0019_Cap-H2Cy3 and Mrg15 FITC_60X_006MAXIP8bit.jpg:Red	1.635	1.299	0.109917
Background fluorescence	DAPI	polytene IF_Cap-H2 Cy3 and Mrg15 FITC_60X_003MAXIP8bit.jpg:Blue	0.461				Background fluorescence	DAPI	polytene IF_0019_Cap-H2Cy3 and Mrg15 FITC_60X_006MAXIP8bit.jpg:Blue	0.327
	Mrg15	polytene IF_Cap-H2 Cy3 and Mrg15 FITC_60X_003MAXIP8bit.jpg:Green	0.942					Mrg15	polytene IF_0019_Cap-H2Cy3 and Mrg15 FITC_60X_006MAXIP8bit.jpg:Green	0.31
	Cap-H2	polytene IF_Cap-H2 Cy3 and Mrg15 FITC_60X_003MAXIP8bit.jpg:Red	1.001					Cap-H2	polytene IF_0019_Cap-H2Cy3 and Mrg15 FITC_60X_006MAXIP8bit.jpg:Red	0.336
IF	DAPI	polytene IF_Cap-H2 Cy3 and Mrg15 FITC_60X_005MAXIP8bit.jpg:Blue	5.912	5.406	1		IF	DAPI	polytene IF_0019_Cap-H2Cy3 and Mrg15 FITC_60X_002MAXIP8bit.jpg:Blue	10.535	10.107	1
	Mrg15	polytene IF_Cap-H2 Cy3 and Mrg15 FITC_60X_005MAXIP8bit.jpg:Green	9.347	7.532	1.39327			Mrg15	polytene IF_0019_Cap-H2Cy3 and Mrg15 FITC_60X_002MAXIP8bit.jpg:Green	8.352	7.656	0.757495
	Cap-H2	polytene IF_Cap-H2 Cy3 and Mrg15 FITC_60X_005MAXIP8bit.jpg:Red	5.828	3.312	0.612653			Cap-H2	polytene IF_0019_Cap-H2Cy3 and Mrg15 FITC_60X_002MAXIP8bit.jpg:Red	2.573	1.91	0.188978
Background fluorescence	DAPI	polytene IF_Cap-H2 Cy3 and Mrg15 FITC_60X_005MAXIP8bit.jpg:Blue	0.506				Background fluorescence	DAPI	polytene IF_0019_Cap-H2Cy3 and Mrg15 FITC_60X_002MAXIP8bit.jpg:Blue	0.428
	Mrg15	polytene IF_Cap-H2 Cy3 and Mrg15 FITC_60X_005MAXIP8bit.jpg:Green	1.815					Mrg15	polytene IF_0019_Cap-H2Cy3 and Mrg15 FITC_60X_002MAXIP8bit.jpg:Green	0.696
	Cap-H2	polytene IF_Cap-H2 Cy3 and Mrg15 FITC_60X_005MAXIP8bit.jpg:Red	2.516					Cap-H2	polytene IF_0019_Cap-H2Cy3 and Mrg15 FITC_60X_002MAXIP8bit.jpg:Red	0.663
IF	DAPI	polytene IF_Cap-H2 Cy3 and Mrg15 FITC_60X_005MAXIP8bit.jpg:Blue	6.027	5.496	1		IF	DAPI	polytene IF_0019_Cap-H2Cy3 and Mrg15 FITC_60X_003MAXIP8bit.jpg:Blue	7.062	6.626	1
	Mrg15	polytene IF_Cap-H2 Cy3 and Mrg15 FITC_60X_005MAXIP8bit.jpg:Green	11.999	9.618	1.75			Mrg15	polytene IF_0019_Cap-H2Cy3 and Mrg15 FITC_60X_003MAXIP8bit.jpg:Green	5.331	4.431	0.668729
	Cap-H2	polytene IF_Cap-H2 Cy3 and Mrg15 FITC_60X_005MAXIP8bit.jpg:Red	3.122	1.159	0.210881			Cap-H2	polytene IF_0019_Cap-H2Cy3 and Mrg15 FITC_60X_003MAXIP8bit.jpg:Red	2.451	1.881	0.283882
Background fluorescence	DAPI	polytene IF_Cap-H2 Cy3 and Mrg15 FITC_60X_005MAXIP8bit.jpg:Blue	0.531				Background fluorescence	DAPI	polytene IF_0019_Cap-H2Cy3 and Mrg15 FITC_60X_003MAXIP8bit.jpg:Blue	0.436
	Mrg15	polytene IF_Cap-H2 Cy3 and Mrg15 FITC_60X_005MAXIP8bit.jpg:Green	2.381					Mrg15	polytene IF_0019_Cap-H2Cy3 and Mrg15 FITC_60X_003MAXIP8bit.jpg:Green	0.9
	Cap-H2	polytene IF_Cap-H2 Cy3 and Mrg15 FITC_60X_005MAXIP8bit.jpg:Red	1.963					Cap-H2	polytene IF_0019_Cap-H2Cy3 and Mrg15 FITC_60X_003MAXIP8bit.jpg:Red	0.57
IF	DAPI	polytene IF_Cap-H2 Cy3 and Mrg15 FITC_60X_006MAXIP8bit.jpg:Blue	4.948	4.137	1		IF	DAPI	polytene IF_0019_Cap-H2Cy3 and Mrg15 FITC_60X_001MAXIP8bit.jpg:Blue	8.096	7.658	1
	Mrg15	polytene IF_Cap-H2 Cy3 and Mrg15 FITC_60X_006MAXIP8bit.jpg:Green	9.107	7.173	1.73387			Mrg15	polytene IF_0019_Cap-H2Cy3 and Mrg15 FITC_60X_001MAXIP8bit.jpg:Green	7.69	7.018	0.916427
	Cap-H2	polytene IF_Cap-H2 Cy3 and Mrg15 FITC_60X_006MAXIP8bit.jpg:Red	7.703	3.409	0.824027			Cap-H2	polytene IF_0019_Cap-H2Cy3 and Mrg15 FITC_60X_001MAXIP8bit.jpg:Red	2.607	1.851	0.241708
Background fluorescence	DAPI	polytene IF_Cap-H2 Cy3 and Mrg15 FITC_60X_006MAXIP8bit.jpg:Blue	0.811				Background fluorescence	DAPI	polytene IF_0019_Cap-H2Cy3 and Mrg15 FITC_60X_001MAXIP8bit.jpg:Blue	0.438
	Mrg15	polytene IF_Cap-H2 Cy3 and Mrg15 FITC_60X_006MAXIP8bit.jpg:Green	1.934					Mrg15	polytene IF_0019_Cap-H2Cy3 and Mrg15 FITC_60X_001MAXIP8bit.jpg:Green	0.672
	Cap-H2	polytene IF_Cap-H2 Cy3 and Mrg15 FITC_60X_006MAXIP8bit.jpg:Red	4.294					Cap-H2	polytene IF_0019_Cap-H2Cy3 and Mrg15 FITC_60X_001MAXIP8bit.jpg:Red	0.756
IF	DAPI	polytene IF_Cap-H2 Cy3 and Mrg15 FITC_60X_004MAXIP8bit.jpg:Blue	5.354	4.844	1		IF	DAPI	polytene IF_0019_Cap-H2Cy3 and Mrg15 FITC_60X_004MAXIP8bit.jpg:Blue	10.131	9.688	1
	Mrg15	polytene IF_Cap-H2 Cy3 and Mrg15 FITC_60X_004MAXIP8bit.jpg:Green	6.139	5.002	1.03262			Mrg15	polytene IF_0019_Cap-H2Cy3 and Mrg15 FITC_60X_004MAXIP8bit.jpg:Green	6.522	5.856	0.604459
	Cap-H2	polytene IF_Cap-H2 Cy3 and Mrg15 FITC_60X_004MAXIP8bit.jpg:Red	3.284	1.308	0.270025			Cap-H2	polytene IF_0019_Cap-H2Cy3 and Mrg15 FITC_60X_004MAXIP8bit.jpg:Red	3.319	2.641	0.272605
Background fluorescence	DAPI	polytene IF_Cap-H2 Cy3 and Mrg15 FITC_60X_004MAXIP8bit.jpg:Blue	0.51				Background fluorescence	DAPI	polytene IF_0019_Cap-H2Cy3 and Mrg15 FITC_60X_004MAXIP8bit.jpg:Blue	0.443
	Mrg15	polytene IF_Cap-H2 Cy3 and Mrg15 FITC_60X_004MAXIP8bit.jpg:Green	1.137					Mrg15	polytene IF_0019_Cap-H2Cy3 and Mrg15 FITC_60X_004MAXIP8bit.jpg:Green	0.666
	Cap-H2	polytene IF_Cap-H2 Cy3 and Mrg15 FITC_60X_004MAXIP8bit.jpg:Red	1.976					Cap-H2	polytene IF_0019_Cap-H2Cy3 and Mrg15 FITC_60X_004MAXIP8bit.jpg:Red	0.678
Replicate 2
Control		Image/Channel	Mean Intensity	Background subtracted values	Ratio	Average ratio wild type control	Cap-H20019		Image/Channel	Mean Intensity	Background subtracted values	Ratio	Average ratio Cap-H2 mutant	Ratio mutant/wild type
IF	DAPI	polytene IF_OR_Cap-H2Cy3 and Mrg15 FITC_60X_001MAXIP8bit.jpg:Blue	9.906	9.465	1	1	IF	DAPI	polytene IF_0019_Cap-H2Cy3 and Mrg15 FITC_60X_005MAXIP8bit.jpg:Blue	12.39	12.073	1	1	1
	Mrg15	polytene IF_OR_Cap-H2Cy3 and Mrg15 FITC_60X_001MAXIP8bit.jpg:Green	6.999	5.952	0.628843	1.08145		Mrg15	polytene IF_0019_Cap-H2Cy3 and Mrg15 FITC_60X_005MAXIP8bit.jpg:Green	5.942	5.697	0.471879	0.465848	0.430761
	Cap-H2	polytene IF_OR_Cap-H2Cy3 and Mrg15 FITC_60X_001MAXIP8bit.jpg:Red	8.285	3.632	0.38373	0.392353		Cap-H2	polytene IF_0019_Cap-H2Cy3 and Mrg15 FITC_60X_005MAXIP8bit.jpg:Red	5.185	4.48	0.371076	0.155586	0.396545
Background fluorescence	DAPI	polytene IF_OR_Cap-H2Cy3 and Mrg15 FITC_60X_001MAXIP8bit.jpg:Blue	0.441				Background fluorescence	DAPI	polytene IF_0019_Cap-H2Cy3 and Mrg15 FITC_60X_005MAXIP8bit.jpg:Blue	0.317
	Mrg15	polytene IF_OR_Cap-H2Cy3 and Mrg15 FITC_60X_001MAXIP8bit.jpg:Green	1.047					Mrg15	polytene IF_0019_Cap-H2Cy3 and Mrg15 FITC_60X_005MAXIP8bit.jpg:Green	0.245
	Cap-H2	polytene IF_OR_Cap-H2Cy3 and Mrg15 FITC_60X_001MAXIP8bit.jpg:Red	4.653					Cap-H2	polytene IF_0019_Cap-H2Cy3 and Mrg15 FITC_60X_005MAXIP8bit.jpg:Red	0.705
IF	DAPI	polytene IF_OR_Cap-H2Cy3 and Mrg15 FITC_60X_001MAXIP8bit.jpg:Blue	5.381	4.932	1		IF	DAPI	polytene IF_0019_Cap-H2Cy3 and Mrg15 FITC_60X_003MAXIP8bit.jpg:Blue	12.535	12.115	1
	Mrg15	polytene IF_OR_Cap-H2Cy3 and Mrg15 FITC_60X_001MAXIP8bit.jpg:Green	6.575	5.639	1.14335			Mrg15	polytene IF_0019_Cap-H2Cy3 and Mrg15 FITC_60X_003MAXIP8bit.jpg:Green	7.022	6.504	0.536855
	Cap-H2	polytene IF_OR_Cap-H2Cy3 and Mrg15 FITC_60X_001MAXIP8bit.jpg:Red	8.348	5.589	1.13321			Cap-H2	polytene IF_0019_Cap-H2Cy3 and Mrg15 FITC_60X_003MAXIP8bit.jpg:Red	4.309	1.282	0.105819
Background fluorescence	DAPI	polytene IF_OR_Cap-H2Cy3 and Mrg15 FITC_60X_001MAXIP8bit.jpg:Blue	0.449				Background fluorescence	DAPI	polytene IF_0019_Cap-H2Cy3 and Mrg15 FITC_60X_003MAXIP8bit.jpg:Blue	0.42
	Mrg15	polytene IF_OR_Cap-H2Cy3 and Mrg15 FITC_60X_001MAXIP8bit.jpg:Green	0.936					Mrg15	polytene IF_0019_Cap-H2Cy3 and Mrg15 FITC_60X_003MAXIP8bit.jpg:Green	0.518
	Cap-H2	polytene IF_OR_Cap-H2Cy3 and Mrg15 FITC_60X_001MAXIP8bit.jpg:Red	2.759					Cap-H2	polytene IF_0019_Cap-H2Cy3 and Mrg15 FITC_60X_003MAXIP8bit.jpg:Red	3.027
IF	DAPI	polytene IF_OR_Cap-H2Cy3 and Mrg15 FITC_60X_002MAXIP8bit.jpg:Blue	8.125	7.923	1		IF	DAPI	polytene IF_0019_Cap-H2Cy3 and Mrg15 FITC_60X_004MAXIP8bit.jpg:Blue	7.825	7.422	1
	Mrg15	polytene IF_OR_Cap-H2Cy3 and Mrg15 FITC_60X_002MAXIP8bit.jpg:Green	6.415	6.289	0.793765			Mrg15	polytene IF_0019_Cap-H2Cy3 and Mrg15 FITC_60X_004MAXIP8bit.jpg:Green	6.324	5.428	0.731339
	Cap-H2	polytene IF_OR_Cap-H2Cy3 and Mrg15 FITC_60X_002MAXIP8bit.jpg:Red	3.944	3.635	0.458791			Cap-H2	polytene IF_0019_Cap-H2Cy3 and Mrg15 FITC_60X_004MAXIP8bit.jpg:Red	3.733	1.585	0.213554
Background fluorescence	DAPI	polytene IF_OR_Cap-H2Cy3 and Mrg15 FITC_60X_002MAXIP8bit.jpg:Blue	0.202				Background fluorescence	DAPI	polytene IF_0019_Cap-H2Cy3 and Mrg15 FITC_60X_004MAXIP8bit.jpg:Blue	0.403
	Mrg15	polytene IF_OR_Cap-H2Cy3 and Mrg15 FITC_60X_002MAXIP8bit.jpg:Green	0.126					Mrg15	polytene IF_0019_Cap-H2Cy3 and Mrg15 FITC_60X_004MAXIP8bit.jpg:Green	0.896
	Cap-H2	polytene IF_OR_Cap-H2Cy3 and Mrg15 FITC_60X_002MAXIP8bit.jpg:Red	0.309					Cap-H2	polytene IF_0019_Cap-H2Cy3 and Mrg15 FITC_60X_004MAXIP8bit.jpg:Red	2.148
IF	DAPI	polytene IF_OR_Cap-H2Cy3 and Mrg15 FITC_60X_002MAXIP8bit.jpg:Blue	6.157	5.882	1		IF	DAPI	polytene IF_0019_Cap-H2Cy3 and Mrg15 FITC_60X_006MAXIP8bit.jpg:Blue	15.663	15.177	1
	Mrg15	polytene IF_OR_Cap-H2Cy3 and Mrg15 FITC_60X_002MAXIP8bit.jpg:Green	9.401	9.015	1.53264			Mrg15	polytene IF_0019_Cap-H2Cy3 and Mrg15 FITC_60X_006MAXIP8bit.jpg:Green	11.327	10.896	0.717928
	Cap-H2	polytene IF_OR_Cap-H2Cy3 and Mrg15 FITC_60X_002MAXIP8bit.jpg:Red	1.85	0.136	0.0231214			Cap-H2	polytene IF_0019_Cap-H2Cy3 and Mrg15 FITC_60X_006MAXIP8bit.jpg:Red	6.923	2.401	0.1582
Background fluorescence	DAPI	polytene IF_OR_Cap-H2Cy3 and Mrg15 FITC_60X_002MAXIP8bit.jpg:Blue	0.275				Background fluorescence	DAPI	polytene IF_0019_Cap-H2Cy3 and Mrg15 FITC_60X_006MAXIP8bit.jpg:Blue	0.486
	Mrg15	polytene IF_OR_Cap-H2Cy3 and Mrg15 FITC_60X_002MAXIP8bit.jpg:Green	0.386					Mrg15	polytene IF_0019_Cap-H2Cy3 and Mrg15 FITC_60X_006MAXIP8bit.jpg:Green	0.431
	Cap-H2	polytene IF_OR_Cap-H2Cy3 and Mrg15 FITC_60X_002MAXIP8bit.jpg:Red	1.714					Cap-H2	polytene IF_0019_Cap-H2Cy3 and Mrg15 FITC_60X_006MAXIP8bit.jpg:Red	4.522
IF	DAPI	polytene IF_OR_Cap-H2Cy3 and Mrg15 FITC_60X_003MAXIP8bit.jpg:Blue	17.353	17.077	1		IF	DAPI	polytene IF_0019_Cap-H2Cy3 and Mrg15 FITC_60X_001MAXIP8bit.jpg:Blue	10.119	9.849	1
	Mrg15	polytene IF_OR_Cap-H2Cy3 and Mrg15 FITC_60X_003MAXIP8bit.jpg:Green	14.824	14.643	0.857469			Mrg15	polytene IF_0019_Cap-H2Cy3 and Mrg15 FITC_60X_001MAXIP8bit.jpg:Green	1.913	1.708	0.173419
	Cap-H2	polytene IF_OR_Cap-H2Cy3 and Mrg15 FITC_60X_003MAXIP8bit.jpg:Red	6.063	5.672	0.332143			Cap-H2	polytene IF_0019_Cap-H2Cy3 and Mrg15 FITC_60X_001MAXIP8bit.jpg:Red	0.698	0.396	0.0402071
Background fluorescence	DAPI	polytene IF_OR_Cap-H2Cy3 and Mrg15 FITC_60X_003MAXIP8bit.jpg:Blue	0.276				Background fluorescence	DAPI	polytene IF_0019_Cap-H2Cy3 and Mrg15 FITC_60X_001MAXIP8bit.jpg:Blue	0.27
	Mrg15	polytene IF_OR_Cap-H2Cy3 and Mrg15 FITC_60X_003MAXIP8bit.jpg:Green	0.181					Mrg15	polytene IF_0019_Cap-H2Cy3 and Mrg15 FITC_60X_001MAXIP8bit.jpg:Green	0.205
	Cap-H2	polytene IF_OR_Cap-H2Cy3 and Mrg15 FITC_60X_003MAXIP8bit.jpg:Red	0.391					Cap-H2	polytene IF_0019_Cap-H2Cy3 and Mrg15 FITC_60X_001MAXIP8bit.jpg:Red	0.302
							IF	DAPI	polytene IF_0019_Cap-H2Cy3 and Mrg15 FITC_60X_002MAXIP8bit.jpg:Blue	8.452	8.218	1
								Mrg15	polytene IF_0019_Cap-H2Cy3 and Mrg15 FITC_60X_002MAXIP8bit.jpg:Green	1.514	1.345	0.163665
								Cap-H2	polytene IF_0019_Cap-H2Cy3 and Mrg15 FITC_60X_002MAXIP8bit.jpg:Red	0.559	0.367	0.0446581
							Background fluorescence	DAPI	polytene IF_0019_Cap-H2Cy3 and Mrg15 FITC_60X_002MAXIP8bit.jpg:Blue	0.234
								Mrg15	polytene IF_0019_Cap-H2Cy3 and Mrg15 FITC_60X_002MAXIP8bit.jpg:Green	0.169
								Cap-H2	polytene IF_0019_Cap-H2Cy3 and Mrg15 FITC_60X_002MAXIP8bit.jpg:Red	0.192
Replicate 3
Control		Image/Channel	Mean Intensity	Background subtracted values	Ratio	Average ratio wild type control	Cap-H20019		Image/Channel	Mean Intensity	Background subtracted values	Ratio	Average ratio Cap-H2 mutant	Ratio mutant/wild type
IF	DAPI	MAX_10-19-14_polytene IF_OR_Cap-H2 and Mrg15_001.nd2:1	117.277	117.208	1	1	IF	DAPI	MAX_10-19-14_polytene IF_0019_Cap-H2 and Mrg15_001.nd2:1	277.817	277.783	1	1	1
	Mrg15	MAX_10-19-14_polytene IF_OR_Cap-H2 and Mrg15_001.nd2:2	121.547	82.251	0.701752	0.740617		Mrg15	MAX_10-19-14_polytene IF_0019_Cap-H2 and Mrg15_001.nd2:2	147.17	142.04	0.511334	0.377292	0.509429
	Cap-H2	MAX_10-19-14_polytene IF_OR_Cap-H2 and Mrg15_001.nd2:3	51.299	26.372	0.225002	0.524102		Cap-H2	MAX_10-19-14_polytene IF_0019_Cap-H2 and Mrg15_001.nd2:3	161.156	146.674	0.528016	0.292453	0.558008
Background fluorescence	DAPI	MAX_10-19-14_polytene IF_OR_Cap-H2 and Mrg15_001.nd2:1	0.069				Background fluorescence	DAPI	MAX_10-19-14_polytene IF_0019_Cap-H2 and Mrg15_001.nd2:1	0.034
	Mrg15	MAX_10-19-14_polytene IF_OR_Cap-H2 and Mrg15_001.nd2:2	39.296					Mrg15	MAX_10-19-14_polytene IF_0019_Cap-H2 and Mrg15_001.nd2:2	5.13
	Cap-H2	MAX_10-19-14_polytene IF_OR_Cap-H2 and Mrg15_001.nd2:3	24.927					Cap-H2	MAX_10-19-14_polytene IF_0019_Cap-H2 and Mrg15_001.nd2:3	14.482
IF	DAPI	MAX_10-19-14_polytene IF_OR_Cap-H2 and Mrg15_002.nd2:1	306.161	304.216	1		IF	DAPI	MAX_10-19-14_polytene IF_0019_Cap-H2 and Mrg15_002.nd2:1	431.118	431.116	1
	Mrg15	MAX_10-19-14_polytene IF_OR_Cap-H2 and Mrg15_002.nd2:2	294.449	256.228	0.842257			Mrg15	MAX_10-19-14_polytene IF_0019_Cap-H2 and Mrg15_002.nd2:2	57.532	50.658	0.117504
	Cap-H2	MAX_10-19-14_polytene IF_OR_Cap-H2 and Mrg15_002.nd2:3	173.779	147.039	0.483337			Cap-H2	MAX_10-19-14_polytene IF_0019_Cap-H2 and Mrg15_002.nd2:3	57.819	50.945	0.11817
Background fluorescence	DAPI	MAX_10-19-14_polytene IF_OR_Cap-H2 and Mrg15_002.nd2:1	1.945				Background fluorescence	DAPI	MAX_10-19-14_polytene IF_0019_Cap-H2 and Mrg15_002.nd2:1	0.002
	Mrg15	MAX_10-19-14_polytene IF_OR_Cap-H2 and Mrg15_002.nd2:2	38.221					Mrg15	MAX_10-19-14_polytene IF_0019_Cap-H2 and Mrg15_002.nd2:2	6.874
	Cap-H2	MAX_10-19-14_polytene IF_OR_Cap-H2 and Mrg15_002.nd2:3	26.74					Cap-H2	MAX_10-19-14_polytene IF_0019_Cap-H2 and Mrg15_002.nd2:2	6.874
IF	DAPI	MAX_10-19-14_polytene IF_OR_Cap-H2 and Mrg15_003.nd2:1	229.434	229.379	1		IF	DAPI	MAX_10-19-14_polytene IF_0019_Cap-H2 and Mrg15_003.nd2:1	488.167	488.151	1
	Mrg15	MAX_10-19-14_polytene IF_OR_Cap-H2 and Mrg15_003.nd2:2	80.66	61.466	0.267967			Mrg15	MAX_10-19-14_polytene IF_0019_Cap-H2 and Mrg15_003.nd2:2	136.442	128.75	0.26375
	Cap-H2	MAX_10-19-14_polytene IF_OR_Cap-H2 and Mrg15_003.nd2:3	216.51	201.893	0.880172			Cap-H2	MAX_10-19-14_polytene IF_0019_Cap-H2 and Mrg15_003.nd2:3	67.341	62.813	0.128675
Background fluorescence	DAPI	MAX_10-19-14_polytene IF_OR_Cap-H2 and Mrg15_003.nd2:1	0.055				Background fluorescence	DAPI	MAX_10-19-14_polytene IF_0019_Cap-H2 and Mrg15_003.nd2:1	0.016
	Mrg15	MAX_10-19-14_polytene IF_OR_Cap-H2 and Mrg15_003.nd2:2	19.194					Mrg15	MAX_10-19-14_polytene IF_0019_Cap-H2 and Mrg15_003.nd2:2	7.692
	Cap-H2	MAX_10-19-14_polytene IF_OR_Cap-H2 and Mrg15_003.nd2:3	14.617					Cap-H2	MAX_10-19-14_polytene IF_0019_Cap-H2 and Mrg15_003.nd2:3	4.528
IF	DAPI	MAX_10-19-14_polytene IF_OR_Cap-H2 and Mrg15_004-1.nd2:1	264.32	263.476	1		IF	DAPI	MAX_10-19-14_polytene IF_0019_Cap-H2 and Mrg15_004.nd2:1	318.463	318.459	1
	Mrg15	MAX_10-19-14_polytene IF_OR_Cap-H2 and Mrg15_004-1.nd2:2	340.402	309.772	1.17571			Mrg15	MAX_10-19-14_polytene IF_0019_Cap-H2 and Mrg15_004.nd2:2	130.931	127.033	0.398899
	Cap-H2	MAX_10-19-14_polytene IF_OR_Cap-H2 and Mrg15_004-1.nd2:3	139.407	117.679	0.44664			Cap-H2	MAX_10-19-14_polytene IF_0019_Cap-H2 and Mrg15_004.nd2:3	156.616	149.924	0.47078
Background fluorescence	DAPI	MAX_10-19-14_polytene IF_OR_Cap-H2 and Mrg15_004-1.nd2:1	0.844				Background fluorescence	DAPI	MAX_10-19-14_polytene IF_0019_Cap-H2 and Mrg15_004.nd2:1	0.004
	Mrg15	MAX_10-19-14_polytene IF_OR_Cap-H2 and Mrg15_004-1.nd2:2	30.63					Mrg15	MAX_10-19-14_polytene IF_0019_Cap-H2 and Mrg15_004.nd2:2	3.898
	Cap-H2	MAX_10-19-14_polytene IF_OR_Cap-H2 and Mrg15_004-1.nd2:3	21.728					Cap-H2	MAX_10-19-14_polytene IF_0019_Cap-H2 and Mrg15_004.nd2:3	6.692
IF	DAPI	MAX_10-19-14_polytene IF_OR_Cap-H2 and Mrg15_005.nd2:1	169.919	169.266	1		IF	DAPI	MAX_10-19-14_polytene IF_0019_Cap-H2 and Mrg15_005.nd2:1	400.842	400.402	1
	Mrg15	MAX_10-19-14_polytene IF_OR_Cap-H2 and Mrg15_005.nd2:2	148.781	121.092	0.715395			Mrg15	MAX_10-19-14_polytene IF_0019_Cap-H2 and Mrg15_005.nd2:2	246.566	238.227	0.59497
	Cap-H2	MAX_10-19-14_polytene IF_OR_Cap-H2 and Mrg15_005.nd2:3	114.431	99.081	0.585357			Cap-H2	MAX_10-19-14_polytene IF_0019_Cap-H2 and Mrg15_005.nd2:3	107.358	86.736	0.216622
Background fluorescence	DAPI	MAX_10-19-14_polytene IF_OR_Cap-H2 and Mrg15_005.nd2:1	0.653				Background fluorescence	DAPI	MAX_10-19-14_polytene IF_0019_Cap-H2 and Mrg15_005.nd2:1	0.44
	Mrg15	MAX_10-19-14_polytene IF_OR_Cap-H2 and Mrg15_005.nd2:2	27.689					Mrg15	MAX_10-19-14_polytene IF_0019_Cap-H2 and Mrg15_005.nd2:2	8.339
	Cap-H2	MAX_10-19-14_polytene IF_OR_Cap-H2 and Mrg15_005.nd2:3	15.35					Cap-H2	MAX_10-19-14_polytene IF_0019_Cap-H2 and Mrg15_005.nd2:3	20.622

## Sheet: Figure 3E measurements
Replicate 1
Control		Image/Channel	Mean Intensity	Background subtracted values	Ratio	Average ratio wild type control	Mrg15 RNAi		Image/Channel	Mean Intensity	Background subtracted values	Ratio	Average ratio Cap-H2 mutant	Ratio mutant/wild type	Average ratio all replicates
IF	DAPI	8-22-14_polytene IF_CAP-H2 and MRG15_setting 1_004MAXIP8bit.jpg:Blue	10.754	10.204	1	1	IF	DAPI	8-22-14_polytene IF_CAP-H2 and MRG15_setting 1_004MAXIP8bit.jpg:Blue	6.564	6.066	1	1	1	1
	Mrg15	8-22-14_polytene IF_CAP-H2 and MRG15_setting 1_004MAXIP8bit.jpg:Green	43.368	40.358	3.95512	2.22327		Mrg15	8-22-14_polytene IF_CAP-H2 and MRG15_setting 1_004MAXIP8bit.jpg:Green	1.617	0.52	0.0857237	0.158533	0.0713063	0.0564326
	Cap-H2	8-22-14_polytene IF_CAP-H2 and MRG15_setting 1_004MAXIP8bit.jpg:Red	14.641	7.917	0.775872	0.626076		Cap-H2	8-22-14_polytene IF_CAP-H2 and MRG15_setting 1_004MAXIP8bit.jpg:Red	1.127	0.248	0.0408836	0.0486223	0.077662	0.200424
Background fluorescence	DAPI	8-22-14_polytene IF_CAP-H2 and MRG15_setting 1_004MAXIP8bit.jpg:Blue	0.55				Background fluorescence	DAPI	8-22-14_polytene IF_CAP-H2 and MRG15_setting 1_004MAXIP8bit.jpg:Blue	0.498
	Mrg15	8-22-14_polytene IF_CAP-H2 and MRG15_setting 1_004MAXIP8bit.jpg:Green	3.01					Mrg15	8-22-14_polytene IF_CAP-H2 and MRG15_setting 1_004MAXIP8bit.jpg:Green	1.097
	Cap-H2	8-22-14_polytene IF_CAP-H2 and MRG15_setting 1_004MAXIP8bit.jpg:Red	6.724					Cap-H2	8-22-14_polytene IF_CAP-H2 and MRG15_setting 1_004MAXIP8bit.jpg:Red	0.879
IF	DAPI	8-22-14_polytene IF_CAP-H2 and MRG15_setting 1_004MAXIP8bit.jpg:Blue	6.467	5.918	1		IF	DAPI	8-22-14_polytene IF_CAP-H2 and MRG15_setting 1_001MAXIP8bit.jpg:Blue	5.639	5.119	1
	Mrg15	8-22-14_polytene IF_CAP-H2 and MRG15_setting 1_004MAXIP8bit.jpg:Green	15.675	12.522	2.11592			Mrg15	8-22-14_polytene IF_CAP-H2 and MRG15_setting 1_001MAXIP8bit.jpg:Green	2.311	1.081	0.211174
	Cap-H2	8-22-14_polytene IF_CAP-H2 and MRG15_setting 1_004MAXIP8bit.jpg:Red	12.04	2.753	0.465191			Cap-H2	8-22-14_polytene IF_CAP-H2 and MRG15_setting 1_001MAXIP8bit.jpg:Red	1.858	0.429	0.0838054
Background fluorescence	DAPI	8-22-14_polytene IF_CAP-H2 and MRG15_setting 1_004MAXIP8bit.jpg:Blue	0.549				Background fluorescence	DAPI	8-22-14_polytene IF_CAP-H2 and MRG15_setting 1_001MAXIP8bit.jpg:Blue	0.52
	Mrg15	8-22-14_polytene IF_CAP-H2 and MRG15_setting 1_004MAXIP8bit.jpg:Green	3.153					Mrg15	8-22-14_polytene IF_CAP-H2 and MRG15_setting 1_001MAXIP8bit.jpg:Green	1.23
	Cap-H2	8-22-14_polytene IF_CAP-H2 and MRG15_setting 1_004MAXIP8bit.jpg:Red	9.287					Cap-H2	8-22-14_polytene IF_CAP-H2 and MRG15_setting 1_001MAXIP8bit.jpg:Red	1.429
IF	DAPI	8-22-14_polytene IF_CAP-H2 and MRG15_setting 1_003MAXIP8bit.jpg:Blue	16.114	15.55	1		IF	DAPI	8-22-14_polytene IF_CAP-H2 and MRG15_setting 1_003MAXIP8bit.jpg:Blue	16.443	15.885	1
	Mrg15	8-22-14_polytene IF_CAP-H2 and MRG15_setting 1_003MAXIP8bit.jpg:Green	31.97	29.399	1.89061			Mrg15	8-22-14_polytene IF_CAP-H2 and MRG15_setting 1_003MAXIP8bit.jpg:Green	4.857	3.342	0.210387
	Cap-H2	8-22-14_polytene IF_CAP-H2 and MRG15_setting 1_003MAXIP8bit.jpg:Red	17.327	8.376	0.53865			Cap-H2	8-22-14_polytene IF_CAP-H2 and MRG15_setting 1_003MAXIP8bit.jpg:Red	2.55	1.359	0.0855524
Background fluorescence	DAPI	8-22-14_polytene IF_CAP-H2 and MRG15_setting 1_003MAXIP8bit.jpg:Blue	0.564				Background fluorescence	DAPI	8-22-14_polytene IF_CAP-H2 and MRG15_setting 1_003MAXIP8bit.jpg:Blue	0.558
	Mrg15	8-22-14_polytene IF_CAP-H2 and MRG15_setting 1_003MAXIP8bit.jpg:Green	2.571					Mrg15	8-22-14_polytene IF_CAP-H2 and MRG15_setting 1_003MAXIP8bit.jpg:Green	1.515
	Cap-H2	8-22-14_polytene IF_CAP-H2 and MRG15_setting 1_003MAXIP8bit.jpg:Red	8.951					Cap-H2	8-22-14_polytene IF_CAP-H2 and MRG15_setting 1_003MAXIP8bit.jpg:Red	1.191
IF	DAPI	8-22-14_polytene IF_CAP-H2 and MRG15_setting 2_002MAXIP8bit.jpg:Blue	11.461	10.907	1		IF	DAPI	8-22-14_polytene IF_CAP-H2 and MRG15_setting 1_002MAXIP8bit.jpg:Blue	20.446	19.9	1
	Mrg15	8-22-14_polytene IF_CAP-H2 and MRG15_setting 2_002MAXIP8bit.jpg:Green	23.467	18.815	1.72504			Mrg15	8-22-14_polytene IF_CAP-H2 and MRG15_setting 1_002MAXIP8bit.jpg:Green	5.239	2.545	0.127889
	Cap-H2	8-22-14_polytene IF_CAP-H2 and MRG15_setting 2_002MAXIP8bit.jpg:Red	10.569	3.107	0.284863			Cap-H2	8-22-14_polytene IF_CAP-H2 and MRG15_setting 1_002MAXIP8bit.jpg:Red	1.957	0.759	0.0381407
Background fluorescence	DAPI	8-22-14_polytene IF_CAP-H2 and MRG15_setting 2_002MAXIP8bit.jpg:Blue	0.554				Background fluorescence	DAPI	8-22-14_polytene IF_CAP-H2 and MRG15_setting 1_002MAXIP8bit.jpg:Blue	0.546
	Mrg15	8-22-14_polytene IF_CAP-H2 and MRG15_setting 2_002MAXIP8bit.jpg:Green	4.652					Mrg15	8-22-14_polytene IF_CAP-H2 and MRG15_setting 1_002MAXIP8bit.jpg:Green	2.694
	Cap-H2	8-22-14_polytene IF_CAP-H2 and MRG15_setting 2_002MAXIP8bit.jpg:Red	7.462					Cap-H2	8-22-14_polytene IF_CAP-H2 and MRG15_setting 1_002MAXIP8bit.jpg:Red	1.198
IF	DAPI	8-22-14_polytene IF_CAP-H2 and MRG15_setting 2_001MAXIP8bit.jpg:Blue	3.097	2.542	1		IF	DAPI	8-22-14_polytene IF_CAP-H2 and MRG15_setting 1_002MAXIP8bit.jpg:Blue	18.228	17.683	1
	Mrg15	8-22-14_polytene IF_CAP-H2 and MRG15_setting 2_001MAXIP8bit.jpg:Green	6.764	3.954	1.55547			Mrg15	8-22-14_polytene IF_CAP-H2 and MRG15_setting 1_002MAXIP8bit.jpg:Green	5.173	1.625	0.0918962
	Cap-H2	8-22-14_polytene IF_CAP-H2 and MRG15_setting 2_001MAXIP8bit.jpg:Red	12.183	3.134	1.23289			Cap-H2	8-22-14_polytene IF_CAP-H2 and MRG15_setting 1_002MAXIP8bit.jpg:Red	1.848	0.412	0.0232992
Background fluorescence	DAPI	8-22-14_polytene IF_CAP-H2 and MRG15_setting 2_001MAXIP8bit.jpg:Blue	0.555				Background fluorescence	DAPI	8-22-14_polytene IF_CAP-H2 and MRG15_setting 1_002MAXIP8bit.jpg:Blue	0.545
	Mrg15	8-22-14_polytene IF_CAP-H2 and MRG15_setting 2_001MAXIP8bit.jpg:Green	2.81					Mrg15	8-22-14_polytene IF_CAP-H2 and MRG15_setting 1_002MAXIP8bit.jpg:Green	3.548
	Cap-H2	8-22-14_polytene IF_CAP-H2 and MRG15_setting 2_001MAXIP8bit.jpg:Red	9.049					Cap-H2	8-22-14_polytene IF_CAP-H2 and MRG15_setting 1_002MAXIP8bit.jpg:Red	1.436
IF	DAPI	8-22-14_polytene IF_CAP-H2 and MRG15_setting 2_005MAXIP8bit.jpg:Blue	18.166	17.606	1		IF	DAPI	8-22-14_polytene IF_CAP-H2 and MRG15_setting 2_005MAXIP8bit.jpg:Blue	5.823	5.268	1
	Mrg15	8-22-14_polytene IF_CAP-H2 and MRG15_setting 2_005MAXIP8bit.jpg:Green	39.097	36.928	2.09747			Mrg15	8-22-14_polytene IF_CAP-H2 and MRG15_setting 2_005MAXIP8bit.jpg:Green	3.734	1.191	0.226082
	Cap-H2	8-22-14_polytene IF_CAP-H2 and MRG15_setting 2_005MAXIP8bit.jpg:Red	17.925	8.081	0.458991			Cap-H2	8-22-14_polytene IF_CAP-H2 and MRG15_setting 2_005MAXIP8bit.jpg:Red	3.293	0.571	0.10839
Background fluorescence	DAPI	8-22-14_polytene IF_CAP-H2 and MRG15_setting 2_005MAXIP8bit.jpg:Blue	0.56				Background fluorescence	DAPI	8-22-14_polytene IF_CAP-H2 and MRG15_setting 2_005MAXIP8bit.jpg:Blue	0.555
	Mrg15	8-22-14_polytene IF_CAP-H2 and MRG15_setting 2_005MAXIP8bit.jpg:Green	2.169					Mrg15	8-22-14_polytene IF_CAP-H2 and MRG15_setting 2_005MAXIP8bit.jpg:Green	2.543
	Cap-H2	8-22-14_polytene IF_CAP-H2 and MRG15_setting 2_005MAXIP8bit.jpg:Red	9.844					Cap-H2	8-22-14_polytene IF_CAP-H2 and MRG15_setting 2_005MAXIP8bit.jpg:Red	2.722
							IF	DAPI	8-22-14_polytene IF_CAP-H2 and MRG15_setting 2_005MAXIP8bit.jpg:Blue	8.431	7.881	1
								Mrg15	8-22-14_polytene IF_CAP-H2 and MRG15_setting 2_005MAXIP8bit.jpg:Green	3.78	1.234	0.156579
								Cap-H2	8-22-14_polytene IF_CAP-H2 and MRG15_setting 2_005MAXIP8bit.jpg:Red	2.409	-0.313	-0.0397158
							Background fluorescence	DAPI	8-22-14_polytene IF_CAP-H2 and MRG15_setting 2_005MAXIP8bit.jpg:Blue	0.55
								Mrg15	8-22-14_polytene IF_CAP-H2 and MRG15_setting 2_005MAXIP8bit.jpg:Green	2.546
								Cap-H2	8-22-14_polytene IF_CAP-H2 and MRG15_setting 2_005MAXIP8bit.jpg:Red	2.722
Replicate 2	DAPI
Control	Mrg15	Image/Channel	Mean Intensity	Background subtracted values	Ratio	Average ratio wild type control	Mrg15 RNAi		Image/Channel	Mean Intensity	Background subtracted values	Ratio	Average ratio Cap-H2 mutant	Ratio mutant/wild type
IF	Cap-H2	polytene IF_10-7-14_Cap-H2 and MRG15_set2_004MAXIP8bit.jpg:Blue	14.343	14.104	1	1	IF	DAPI	polytene IF_10-7-14_Cap-H2 and MRG15_MRG15NRAi_set2_005MAXIP8bit.jpg:Blue	11.238	10.855	1	1	1
		polytene IF_10-7-14_Cap-H2 and MRG15_set2_004MAXIP8bit.jpg:Green	14.972	14.818	1.05062	1.2247		Mrg15	polytene IF_10-7-14_Cap-H2 and MRG15_MRG15NRAi_set2_005MAXIP8bit.jpg:Green	0.361	0.109	0.0100415	0.0368066	0.0300536
		polytene IF_10-7-14_Cap-H2 and MRG15_set2_004MAXIP8bit.jpg:Red	13.634	13.136	0.931367	1.41775		Cap-H2	polytene IF_10-7-14_Cap-H2 and MRG15_MRG15NRAi_set2_005MAXIP8bit.jpg:Red	11.244	9.583	0.882819	0.660542	0.46591
Background fluorescence	DAPI	polytene IF_10-7-14_Cap-H2 and MRG15_set2_004MAXIP8bit.jpg:Blue	0.239				Background fluorescence	DAPI	polytene IF_10-7-14_Cap-H2 and MRG15_MRG15NRAi_set2_005MAXIP8bit.jpg:Blue	0.383
	Mrg15	polytene IF_10-7-14_Cap-H2 and MRG15_set2_004MAXIP8bit.jpg:Green	0.154					Mrg15	polytene IF_10-7-14_Cap-H2 and MRG15_MRG15NRAi_set2_005MAXIP8bit.jpg:Green	0.252
	Cap-H2	polytene IF_10-7-14_Cap-H2 and MRG15_set2_004MAXIP8bit.jpg:Red	0.498					Cap-H2	polytene IF_10-7-14_Cap-H2 and MRG15_MRG15NRAi_set2_005MAXIP8bit.jpg:Red	1.661
IF	DAPI	polytene IF_10-7-14_Cap-H2 and MRG15_set2_004MAXIP8bit.jpg:Blue	3.959	3.736	1		IF	DAPI	polytene IF_10-7-14_Cap-H2 and MRG15_MRG15NRAi_set2_010MAXIP8bit.jpg:Blue	7.109	6.858	1
	Mrg15	polytene IF_10-7-14_Cap-H2 and MRG15_set2_004MAXIP8bit.jpg:Green	7.818	7.666	2.05193			Mrg15	polytene IF_10-7-14_Cap-H2 and MRG15_MRG15NRAi_set2_010MAXIP8bit.jpg:Green	0.33	0.164	0.0239137
	Cap-H2	polytene IF_10-7-14_Cap-H2 and MRG15_set2_004MAXIP8bit.jpg:Red	11.184	10.685	2.86001			Cap-H2	polytene IF_10-7-14_Cap-H2 and MRG15_MRG15NRAi_set2_010MAXIP8bit.jpg:Red	19.449	18.801	2.74147
Background fluorescence	DAPI	polytene IF_10-7-14_Cap-H2 and MRG15_set2_004MAXIP8bit.jpg:Blue	0.223				Background fluorescence	DAPI	polytene IF_10-7-14_Cap-H2 and MRG15_MRG15NRAi_set2_010MAXIP8bit.jpg:Blue	0.251
	Mrg15	polytene IF_10-7-14_Cap-H2 and MRG15_set2_004MAXIP8bit.jpg:Green	0.152					Mrg15	polytene IF_10-7-14_Cap-H2 and MRG15_MRG15NRAi_set2_010MAXIP8bit.jpg:Green	0.166
	Cap-H2	polytene IF_10-7-14_Cap-H2 and MRG15_set2_004MAXIP8bit.jpg:Red	0.499					Cap-H2	polytene IF_10-7-14_Cap-H2 and MRG15_MRG15NRAi_set2_010MAXIP8bit.jpg:Red	0.648
IF	DAPI	polytene IF_10-7-14_Cap-H2 and MRG15_set2_003MAXIP8bit.jpg:Blue	8.294	8.044	1		IF	DAPI	polytene IF_10-7-14_Cap-H2 and MRG15_MRG15NRAi_set2_009MAXIP8bit.jpg:Blue	4.768	4.488	1
	Mrg15	polytene IF_10-7-14_Cap-H2 and MRG15_set2_003MAXIP8bit.jpg:Green	6.129	5.945	0.73906			Mrg15	polytene IF_10-7-14_Cap-H2 and MRG15_MRG15NRAi_set2_009MAXIP8bit.jpg:Green	0.822	0.635	0.141488
	Cap-H2	polytene IF_10-7-14_Cap-H2 and MRG15_set2_003MAXIP8bit.jpg:Red	7.193	6.679	0.830308			Cap-H2	polytene IF_10-7-14_Cap-H2 and MRG15_MRG15NRAi_set2_009MAXIP8bit.jpg:Red	3.577	2.21	0.492424
Background fluorescence	DAPI	polytene IF_10-7-14_Cap-H2 and MRG15_set2_003MAXIP8bit.jpg:Blue	0.25				Background fluorescence	DAPI	polytene IF_10-7-14_Cap-H2 and MRG15_MRG15NRAi_set2_009MAXIP8bit.jpg:Blue	0.28
	Mrg15	polytene IF_10-7-14_Cap-H2 and MRG15_set2_003MAXIP8bit.jpg:Green	0.184					Mrg15	polytene IF_10-7-14_Cap-H2 and MRG15_MRG15NRAi_set2_009MAXIP8bit.jpg:Green	0.187
	Cap-H2	polytene IF_10-7-14_Cap-H2 and MRG15_set2_003MAXIP8bit.jpg:Red	0.514					Cap-H2	polytene IF_10-7-14_Cap-H2 and MRG15_MRG15NRAi_set2_009MAXIP8bit.jpg:Red	1.367
IF	DAPI	polytene IF_10-7-14_Cap-H2 and MRG15_set2_002maxip8BIT.jpg:Blue	4.423	4.179	1		IF	DAPI	polytene IF_10-7-14_Cap-H2 and MRG15_MRG15NRAi_set2_008MAXIP8bit.jpg:Blue	9.401	9.031	1
	Mrg15	polytene IF_10-7-14_Cap-H2 and MRG15_set2_002maxip8BIT.jpg:Green	4.576	4.418	1.05719			Mrg15	polytene IF_10-7-14_Cap-H2 and MRG15_MRG15NRAi_set2_008MAXIP8bit.jpg:Green	0.354	-0.007	-0.000775108
	Cap-H2	polytene IF_10-7-14_Cap-H2 and MRG15_set2_002maxip8BIT.jpg:Red	4.881	4.385	1.04929			Cap-H2	polytene IF_10-7-14_Cap-H2 and MRG15_MRG15NRAi_set2_008MAXIP8bit.jpg:Red	12.291	9.218	1.02071
Background fluorescence	DAPI	polytene IF_10-7-14_Cap-H2 and MRG15_set2_002maxip8BIT.jpg:Blue	0.244				Background fluorescence	DAPI	polytene IF_10-7-14_Cap-H2 and MRG15_MRG15NRAi_set2_008MAXIP8bit.jpg:Blue	0.37
	Mrg15	polytene IF_10-7-14_Cap-H2 and MRG15_set2_002maxip8BIT.jpg:Green	0.158					Mrg15	polytene IF_10-7-14_Cap-H2 and MRG15_MRG15NRAi_set2_008MAXIP8bit.jpg:Green	0.361
	Cap-H2	polytene IF_10-7-14_Cap-H2 and MRG15_set2_002maxip8BIT.jpg:Red	0.496					Cap-H2	polytene IF_10-7-14_Cap-H2 and MRG15_MRG15NRAi_set2_008MAXIP8bit.jpg:Red	3.073
							IF		polytene IF_10-7-14_Cap-H2 and MRG15_MRG15NRAi_set2_006MAXIP8bit.jpg:Blue	7.205	6.941	1
									polytene IF_10-7-14_Cap-H2 and MRG15_MRG15NRAi_set2_006MAXIP8bit.jpg:Green	0.241	0.065	0.00936464
									polytene IF_10-7-14_Cap-H2 and MRG15_MRG15NRAi_set2_006MAXIP8bit.jpg:Red	3.08	1.709	0.246218
									polytene IF_10-7-14_Cap-H2 and MRG15_MRG15NRAi_set2_006MAXIP8bit.jpg:Blue	0.264
									polytene IF_10-7-14_Cap-H2 and MRG15_MRG15NRAi_set2_006MAXIP8bit.jpg:Green	0.176
									polytene IF_10-7-14_Cap-H2 and MRG15_MRG15NRAi_set2_006MAXIP8bit.jpg:Red	1.371
Replicate 3
Control		Image/Channel	Mean Intensity	Background subtracted values	Ratio	Average ratio wild type control	Mrg15 RNAi		Image/Channel	Mean Intensity	Background subtracted values	Ratio	Average ratio Cap-H2 mutant	Ratio mutant/wild type
IF	DAPI	Control_ 002.MAXIP8bit.tif:Blue	19.953	12.301	1	1	IF	DAPI	Mrg15 RNAi_ 006.MAXIP8bit.tif:Blue	23.573	15.593	1	1	1
	Mrg15	Control_ 002.MAXIP8bit.tif:Green	11.049	7.984	0.649053	0.99647		Mrg15	Mrg15 RNAi_ 006.MAXIP8bit.tif:Green	2.818	0.582	0.0373244	0.0676982	0.067938
	Cap-H2	Control_ 002.MAXIP8bit.tif:Red	17.082	3.947	0.320868	0.763831		Cap-H2	Mrg15 RNAi_ 006.MAXIP8bit.tif:Red	9.594	0.457	0.029308	0.0440724	0.0576992
Background fluorescence	DAPI	Control_ 002.MAXIP8bit.tif:Blue	7.652				Background fluorescence	DAPI	Mrg15 RNAi_ 006.MAXIP8bit.tif:Blue	7.98
	Mrg15	Control_ 002.MAXIP8bit.tif:Green	3.065					Mrg15	Mrg15 RNAi_ 006.MAXIP8bit.tif:Green	2.236
	Cap-H2	Control_ 002.MAXIP8bit.tif:Red	13.135					Cap-H2	Mrg15 RNAi_ 006.MAXIP8bit.tif:Red	9.137
IF	DAPI	Control_ 001.MAXIP8bit.tif:Blue	12.619	5.389	1		IF	DAPI	Mrg15 RNAi_ 009.MAXIP8bit.tif:Blue	33.542	25.771	1
	Mrg15	Control_ 001.MAXIP8bit.tif:Green	16.047	12.681	2.35313			Mrg15	Mrg15 RNAi_ 009.MAXIP8bit.tif:Green	4.675	1.855	0.0719801
	Cap-H2	Control_ 001.MAXIP8bit.tif:Red	22.383	9.53	1.76842			Cap-H2	Mrg15 RNAi_ 009.MAXIP8bit.tif:Red	10.761	1.344	0.0521516
Background fluorescence	DAPI	Control_ 001.MAXIP8bit.tif:Blue	7.23				Background fluorescence	DAPI	Mrg15 RNAi_ 009.MAXIP8bit.tif:Blue	7.771
	Mrg15	Control_ 001.MAXIP8bit.tif:Green	3.366					Mrg15	Mrg15 RNAi_ 009.MAXIP8bit.tif:Green	2.82
	Cap-H2	Control_ 001.MAXIP8bit.tif:Red	12.853					Cap-H2	Mrg15 RNAi_ 009.MAXIP8bit.tif:Red	9.417
IF	DAPI	Control_ 004.MAXIP8bit.tif:Blue	27.237	18.903	1		IF	DAPI	Mrg15 RNAi_ 008.MAXIP8bit.tif:Blue	26.194	18.379	1
	Mrg15	Control_ 004.MAXIP8bit.tif:Green	11.904	8.282	0.438132			Mrg15	Mrg15 RNAi_ 008.MAXIP8bit.tif:Green	3.728	1.083	0.0589259
	Cap-H2	Control_ 004.MAXIP8bit.tif:Red	23.141	9.534	0.504364			Cap-H2	Mrg15 RNAi_ 008.MAXIP8bit.tif:Red	9.845	0.596	0.0324283
Background fluorescence	DAPI	Control_ 004.MAXIP8bit.tif:Blue	8.334				Background fluorescence	DAPI	Mrg15 RNAi_ 008.MAXIP8bit.tif:Blue	7.815
	Mrg15	Control_ 004.MAXIP8bit.tif:Green	3.622					Mrg15	Mrg15 RNAi_ 008.MAXIP8bit.tif:Green	2.645
	Cap-H2	Control_ 004.MAXIP8bit.tif:Red	13.607					Cap-H2	Mrg15 RNAi_ 008.MAXIP8bit.tif:Red	9.249
IF	DAPI	Control_ 003.MAXIP8bit.tif:Blue	24.94	16.843	1		IF	DAPI	Mrg15 RNAi_ 007.MAXIP8bit.tif:Blue	20.54	12.724	1
	Mrg15	Control_ 003.MAXIP8bit.tif:Green	12.431	9.189	0.545568			Mrg15	Mrg15 RNAi_ 007.MAXIP8bit.tif:Green	4.057	1.305	0.102562
	Cap-H2	Control_ 003.MAXIP8bit.tif:Red	20.004	7.776	0.461675			Cap-H2	Mrg15 RNAi_ 007.MAXIP8bit.tif:Red	10.041	0.794	0.0624018
Background fluorescence	DAPI	Control_ 003.MAXIP8bit.tif:Blue	8.097				Background fluorescence	DAPI	Mrg15 RNAi_ 007.MAXIP8bit.tif:Blue	7.816
	Mrg15	Control_ 003.MAXIP8bit.tif:Green	3.242					Mrg15	Mrg15 RNAi_ 007.MAXIP8bit.tif:Green	2.752
	Cap-H2	Control_ 003.MAXIP8bit.tif:Red	12.228					Cap-H2	Mrg15 RNAi_ 007.MAXIP8bit.tif:Red	9.247

## Sheet: Figure 5F Cid counts
pMT-eGFP		pMT-Cap-H2-eGFP		pMT-Cap-H2-MBM-eGFP		pMT-Cap-H2-deltaC23-eGFP		pMT-Cap-H2-MBM-deltaC23-eGFP
Source Image	Number of Cid spots	Source Image	Number of Cid spots	Source Image	Number of Cid spots	Source Image	Number of Cid spots	Source Image	Number of Cid spots
Kc IF_pMT-eGFP_CID Cy2 GFP Cy3_001.nd2	1	Kc IF_pMT-Cap-H2-eGFP_CID Cy2 GFP Cy3_001.nd2	1	Kc IF_pMT-Cap-H2-MBM-eGFP_CID Cy2 GFP Cy3_001.nd2	1	Kc IF_Cid Cy2 and GFP Cy3_Cap-H2-dC2-GFP_ Rep3_setting1_006.nd2	1	3-25-14_Kc IF_Cap-h2-MBM-dC23-eGFP_CID Cy2_GFP_Cy5_007.nd2	1
Kc IF_pMT-eGFP_CID Cy2 GFP Cy3_003.nd2	1	Kc IF_pMT-Cap-H2-eGFP_CID Cy2 GFP Cy3_008.nd2	1	Kc IF_pMT-Cap-H2-MBM-eGFP_CID Cy2 GFP Cy3_009.nd2	1	Kc IF_Cid Cy2 and GFP Cy3_Cap-H2-dC23-GFP_ Rep3_set2_005.nd2	1	Kc IF_Cid Cy2 and GFP Cy3_Cap-H2-MBMdC23-GFP_ Rep3_set1_004.nd2	1
Kc IF_pMT-eGFP_CID Cy2 GFP Cy3_003.nd2	1	Kc IF_pMT-Cap-H2-eGFP_CID Cy2 GFP Cy3_008.nd2	1	Kc IF_pMT-Cap-H2-MBM-eGFP_CID Cy2 GFP Cy3_005.nd2	1	Kc IF_Cid Cy2 and GFP Cy3_Cap-H2-dC23-GFP_ Rep3_set2_007.nd2	1	Kc IF_Cid Cy2 and GFP Cy3_Cap-H2-MBMdC23-GFP_ Rep2_set1_002.nd2	1
Kc IF_pMT-eGFP_CID Cy2 GFP Cy3_007.nd2	1	3-27-14_Kc IF_Cap-H2-eGFP_CID Cy2_GFP_Cy5_005.nd2	1	Kc IF_pMT-Cap-H2-MBM-eGFP_CID Cy2 GFP Cy3_005.nd2	1	Kc IF_Cid Cy2 and GFP Cy3_Cap-H2-dC2-GFP_ Rep3_setting1_006.nd2	2	Kc IF_Cid Cy2 and GFP Cy3_Cap-H2-MBMdC23-GFP_ Rep2_set2_001.nd2	1
3-27-14_Kc IF_pMT-eGFP_CID Cy2_GFP_Cy5_004.nd2	1	Kc IF_pMT-Cap-H2-eGFP_CID Cy2 GFP Cy3_004.nd2	2	3-27-14_Kc IF_Cap-H2-MBM-eGFP_CID Cy2_GFP_Cy5_004.nd2	1	Kc IF_Cid Cy2 and GFP Cy3_Cap-H2-dC2-GFP_ Rep3_setting1_006.nd2	2	Kc IF_Cid Cy2 and GFP Cy3_Cap-H2-MBMdC23-GFP_ Rep2_set2_001.nd2	1
3-27-14_Kc IF_pMT-eGFP_CID Cy2_GFP_Cy5_007.nd2	1	Kc IF_pMT-Cap-H2-eGFP_CID Cy2 GFP Cy3_004.nd2	2	3-27-14_Kc IF_Cap-H2-MBM-eGFP_CID Cy2_GFP_Cy5_006.nd2	1	Kc IF_Cid Cy2 and GFP Cy3_Cap-H2-dC2-GFP_ Rep3_setting1_007.nd2	2	Kc IF_Cid Cy2 and GFP Cy3_Cap-H2-MBMdC23-GFP_ Rep2_set2_007.nd2	1
3-27-14_Kc IF_pMT-eGFP_CID Cy2_GFP_Cy5_002.nd2	1	Kc IF_pMT-Cap-H2-eGFP_CID Cy2 GFP Cy3_004.nd2	2	3-27-14_Kc IF_Cap-H2-MBM-eGFP_CID Cy2_GFP_Cy5_007.nd2	1	Kc IF_Cid Cy2 and GFP Cy3_Cap-H2-dC2-GFP_ Rep3_setting1_007.nd2	2	3-25-14_Kc IF_Cap-h2-MBM-dC23-eGFP_CID Cy2_GFP_Cy5_003.nd2	2
3-27-14_Kc IF_pMT-eGFP_CID Cy2_GFP_Cy5_003.nd2	1	Kc IF_pMT-Cap-H2-eGFP_CID Cy2 GFP Cy3_004.nd2	2	Kc IF_pMT-Cap-H2-MBM-eGFP_CID Cy2 GFP Cy3_009.nd2	2	Kc IF_Cid Cy2 and GFP Cy3_Cap-H2-dC2-GFP_ Rep3_setting1_007.nd2	2	3-25-14_Kc IF_Cap-h2-MBM-dC23-eGFP_CID Cy2_GFP_Cy5_001.nd2	2
3-27-14_Kc IF_pMT-eGFP_CID Cy2_GFP_Cy5_004.nd2	1	Kc IF_pMT-Cap-H2-eGFP_CID Cy2 GFP Cy3_004.nd2	2	Kc IF_pMT-Cap-H2-MBM-eGFP_CID Cy2 GFP Cy3_004.nd2	2	Kc IF_Cid Cy2 and GFP Cy3_Cap-H2-dC23-GFP_ Rep3_set2_001.nd2	2	3-25-14_Kc IF_Cap-h2-MBM-dC23-eGFP_CID Cy2_GFP_Cy5_003.nd2	2
Kc IF_pMT-eGFP_CID Cy2 GFP Cy3_003.nd2	2	Kc IF_pMT-Cap-H2-eGFP_CID Cy2 GFP Cy3_003.nd2	2	Kc IF_pMT-Cap-H2-MBM-eGFP_CID Cy2 GFP Cy3_004.nd2	2	Kc IF_Cid Cy2 and GFP Cy3_Cap-H2-dC23-GFP_ Rep3_set2_003.nd2	2	3-25-14_Kc IF_Cap-h2-MBM-dC23-eGFP_CID Cy2_GFP_Cy5_007.nd2	2
Kc IF_pMT-eGFP_CID Cy2 GFP Cy3_003.nd2	2	Kc IF_pMT-Cap-H2-eGFP_CID Cy2 GFP Cy3_003.nd2	2	Kc IF_pMT-Cap-H2-MBM-eGFP_CID Cy2 GFP Cy3_004.nd2	2	Kc IF_Cid Cy2 and GFP Cy3_Cap-H2-dC23-GFP_ Rep3_set2_003.nd2	2	3-25-14_Kc IF_Cap-h2-MBM-dC23-eGFP_CID Cy2_GFP_Cy5_006.nd2	2
Kc IF_pMT-eGFP_CID Cy2 GFP Cy3_002.nd2	2	Kc IF_pMT-Cap-H2-eGFP_CID Cy2 GFP Cy3_003.nd2	2	Kc IF_pMT-Cap-H2-MBM-eGFP_CID Cy2 GFP Cy3_004.nd2	2	Kc IF_Cid Cy2 and GFP Cy3_Cap-H2-dC23-GFP_ Rep3_set2_003.nd2	2	3-25-14_Kc IF_Cap-h2-MBM-dC23-eGFP_CID Cy2_GFP_Cy5_001.nd2	2
Kc IF_pMT-eGFP_CID Cy2 GFP Cy3_002.nd2	2	Kc IF_pMT-Cap-H2-eGFP_CID Cy2 GFP Cy3_002.nd2	2	Kc IF_pMT-Cap-H2-MBM-eGFP_CID Cy2 GFP Cy3_008.nd2	2	Kc IF_Cid Cy2 and GFP Cy3_Cap-H2-dC23-GFP_ Rep3_set2_004.nd2	2	3-25-14_Kc IF_Cap-h2-MBM-dC23-eGFP_CID Cy2_GFP_Cy5_002.nd2	2
Kc IF_pMT-eGFP_CID Cy2 GFP Cy3_001.nd2	2	Kc IF_pMT-Cap-H2-eGFP_CID Cy2 GFP Cy3_002.nd2	2	Kc IF_pMT-Cap-H2-MBM-eGFP_CID Cy2 GFP Cy3_008.nd2	2	Kc IF_Cid Cy2 and GFP Cy3_Cap-H2-dC23-GFP_ Rep3_set2_005.nd2	2	Kc IF_Cid Cy2 and GFP Cy3_Cap-H2-MBMdC23-GFP_ Rep3_set1_002.nd2	2
Kc IF_pMT-eGFP_CID Cy2 GFP Cy3_good locali004.nd2	2	Kc IF_pMT-Cap-H2-eGFP_CID Cy2 GFP Cy3_001.nd2	2	Kc IF_pMT-Cap-H2-MBM-eGFP_CID Cy2 GFP Cy3_008.nd2	2	Kc IF_Cid Cy2 and GFP Cy3_Cap-H2-dC23-GFP_ Rep3_set2_006.nd2	2	Kc IF_Cid Cy2 and GFP Cy3_Cap-H2-MBMdC23-GFP_ Rep3_set1_002.nd2	2
Kc IF_pMT-eGFP_CID Cy2 GFP Cy3_008.nd2	2	Kc IF_pMT-Cap-H2-eGFP_CID Cy2 GFP Cy3_001.nd2	2	Kc IF_pMT-Cap-H2-MBM-eGFP_CID Cy2 GFP Cy3_008.nd2	2	Kc IF_Cid Cy2 and GFP Cy3_Cap-H2-dC23-GFP_ Rep3_set2_006.nd2	2	Kc IF_Cid Cy2 and GFP Cy3_Cap-H2-MBMdC23-GFP_ Rep3_set1_003.nd2	2
Kc IF_pMT-eGFP_CID Cy2 GFP Cy3_007.nd2	2	Kc IF_pMT-Cap-H2-eGFP_CID Cy2 GFP Cy3_005.nd2	2	Kc IF_pMT-Cap-H2-MBM-eGFP_CID Cy2 GFP Cy3_005.nd2	2	Kc IF_Cid Cy2 and GFP Cy3_Cap-H2-dC23-GFP_ Rep3_set2_006.nd2	2	Kc IF_Cid Cy2 and GFP Cy3_Cap-H2-MBMdC23-GFP_ Rep3_set1_004.nd2	2
Kc IF_pMT-eGFP_CID Cy2 GFP Cy3_007.nd2	2	Kc IF_pMT-Cap-H2-eGFP_CID Cy2 GFP Cy3_005.nd2	2	Kc IF_pMT-Cap-H2-MBM-eGFP_CID Cy2 GFP Cy3_006.nd2	2	Kc IF_Cid Cy2 and GFP Cy3_Cap-H2-dC23-GFP_ Rep3_set2_006.nd2	2	Kc IF_Cid Cy2 and GFP Cy3_Cap-H2-MBMdC23-GFP_ Rep3_set1_004.nd2	2
Kc IF_pMT-eGFP_CID Cy2 GFP Cy3_006.nd2	2	Kc IF_pMT-Cap-H2-eGFP_CID Cy2 GFP Cy3_005.nd2	2	Kc IF_pMT-Cap-H2-MBM-eGFP_CID Cy2 GFP Cy3_006.nd2	2	Kc IF_Cid Cy2 and GFP Cy3_Cap-H2-dC23-GFP_ Rep3_set2_007.nd2	2	Kc IF_Cid Cy2 and GFP Cy3_Cap-H2-MBMdC23-GFP_ Rep3_set1_004.nd2	2
Kc IF_pMT-eGFP_CID Cy2 GFP Cy3_006.nd2	2	Kc IF_pMT-Cap-H2-eGFP_CID Cy2 GFP Cy3_005.nd2	2	Kc IF_pMT-Cap-H2-MBM-eGFP_CID Cy2 GFP Cy3_007.nd2	2	Kc IF_Cid Cy2 and GFP Cy3_Cap-H2-dC23-GFP_ Rep3_set2_007.nd2	2	Kc IF_Cid Cy2 and GFP Cy3_Cap-H2-MBMdC23-GFP_ Rep3_set1_004.nd2	2
Kc IF_pMT-eGFP_CID Cy2 GFP Cy3_006.nd2	2	Kc IF_pMT-Cap-H2-eGFP_CID Cy2 GFP Cy3_007.nd2	2	Kc IF_pMT-Cap-H2-MBM-eGFP_CID Cy2 GFP Cy3_007.nd2	2	Kc IF_Cid Cy2 and GFP Cy3_Cap-H2-dC23-GFP_ Rep3_set2_008.nd2	2	Kc IF_Cid Cy2 and GFP Cy3_Cap-H2-MBMdC23-GFP_ Rep3_set1_004.nd2	2
Kc IF_pMT-eGFP_CID Cy2 GFP Cy3_005.nd2	2	Kc IF_pMT-Cap-H2-eGFP_CID Cy2 GFP Cy3_007.nd2	2	Kc IF_pMT-Cap-H2-MBM-eGFP_CID Cy2 GFP Cy3_007.nd2	2	Kc IF_Cid Cy2 and GFP Cy3_Cap-H2-dC2-GFP_ Rep3_setting1_001.nd2	2	Kc IF_Cid Cy2 and GFP Cy3_Cap-H2-MBMdC23-GFP_ Rep3_set2_001.nd2	2
Kc IF_pMT-eGFP_CID Cy2 GFP Cy3_005.nd2	2	Kc IF_pMT-Cap-H2-eGFP_CID Cy2 GFP Cy3_006.nd2	2	Kc IF_pMT-Cap-H2-MBM-eGFP_CID Cy2 GFP Cy3_007.nd2	2	Kc IF_Cid Cy2 and GFP Cy3_Cap-H2-dC2-GFP_ Rep3_setting1_006.nd2	2	Kc IF_Cid Cy2 and GFP Cy3_Cap-H2-MBMdC23-GFP_ Rep3_set2_001.nd2	2
Kc IF_pMT-eGFP_CID Cy2 GFP Cy3_005.nd2	2	Kc IF_pMT-Cap-H2-eGFP_CID Cy2 GFP Cy3_good locali003.nd2	2	Kc IF_pMT-Cap-H2-MBM-eGFP_CID Cy2 GFP Cy3_002.nd2	2	Kc IF_Cid Cy2 and GFP Cy3_Cap-H2-dC2-GFP_ Rep3_setting1_006.nd2	2	Kc IF_Cid Cy2 and GFP Cy3_Cap-H2-MBMdC23-GFP_ Rep3_set2_001.nd2	2
Kc IF_pMT-eGFP_CID Cy2 GFP Cy3_005.nd2	2	Kc IF_pMT-Cap-H2-eGFP_CID Cy2 GFP Cy3_008.nd2	2	Kc IF_pMT-Cap-H2-MBM-eGFP_CID Cy2 GFP Cy3_002.nd2	2	Kc IF_Cid Cy2 and GFP Cy3_Cap-H2-dC2-GFP_ Rep3_setting1_006.nd2	2	Kc IF_Cid Cy2 and GFP Cy3_Cap-H2-MBMdC23-GFP_ Rep3_set2_002.nd2	2
Kc IF_pMT-eGFP_CID Cy2 GFP Cy3_005.nd2	2	Kc IF_pMT-Cap-H2-eGFP_CID Cy2 GFP Cy3_008.nd2	2	Kc IF_pMT-Cap-H2-MBM-eGFP_CID Cy2 GFP Cy3_002.nd2	2	3-25-14_Kc IF_CID Cy2_GFP_Cy5_003.nd2	2	Kc IF_Cid Cy2 and GFP Cy3_Cap-H2-MBMdC23-GFP_ Rep3_set2_003.nd2	2
Kc IF_pMT-eGFP_CID Cy2 GFP Cy3_004.nd2	2	3-27-14_Kc IF_Cap-H2-eGFP_CID Cy2_GFP_Cy5_004.nd2	2	Kc IF_pMT-Cap-H2-MBM-eGFP_CID Cy2 GFP Cy3_003.nd2	2	3-25-14_Kc IF_CID Cy2_GFP_Cy5_005.nd2	2	Kc IF_Cid Cy2 and GFP Cy3_Cap-H2-MBMdC23-GFP_ Rep3_set2_003.nd2	2
Kc IF_pMT-eGFP_CID Cy2 GFP Cy3_004.nd2	2	3-27-14_Kc IF_Cap-H2-eGFP_CID Cy2_GFP_Cy5_004.nd2	2	Kc IF_pMT-Cap-H2-MBM-eGFP_CID Cy2 GFP Cy3_003.nd2	2	3-25-14_Kc IF_CID Cy2_GFP_Cy5_008.nd2	2	Kc IF_Cid Cy2 and GFP Cy3_Cap-H2-MBMdC23-GFP_ Rep3_set2_005.nd2	2
Kc IF_pMT-eGFP_CID Cy2 GFP Cy3_004.nd2	2	3-27-14_Kc IF_Cap-H2-eGFP_CID Cy2_GFP_Cy5_005.nd2	2	Kc IF_pMT-Cap-H2-MBM-eGFP_CID Cy2 GFP Cy3_003.nd2	2	3-25-14_Kc IF_CID Cy2_GFP_Cy5_004.nd2	2	Kc IF_Cid Cy2 and GFP Cy3_Cap-H2-MBMdC23-GFP_ Rep3_set2_006.nd2	2
Kc IF_pMT-eGFP_CID Cy2 GFP Cy3_004.nd2	2	3-27-14_Kc IF_Cap-H2-eGFP_CID Cy2_GFP_Cy5_005.nd2	2	Kc IF_pMT-Cap-H2-MBM-eGFP_CID Cy2 GFP Cy3_003.nd2	2	3-25-14_Kc IF_CID Cy2_GFP_Cy5_005.nd2	2	Kc IF_Cid Cy2 and GFP Cy3_Cap-H2-MBMdC23-GFP_ Rep3_set2_006.nd2	2
Kc IF_pMT-eGFP_CID Cy2 GFP Cy3_004.nd2	2	3-27-14_Kc IF_Cap-H2-eGFP_CID Cy2_GFP_Cy5_005.nd2	2	Kc IF_pMT-Cap-H2-MBM-eGFP_CID Cy2 GFP Cy3_003.nd2	2	Kc IF_pMT-Cap-H2-dC23-eGFP_CID Cy2 GFP Cy3_009.nd2	2	Kc IF_Cid Cy2 and GFP Cy3_Cap-H2-MBMdC23-GFP_ Rep2_set1_001.nd2	2
3-27-14_Kc IF_pMT-eGFP_CID Cy2_GFP_Cy5_004.nd2	2	3-27-14_Kc IF_Cap-H2-eGFP_CID Cy2_GFP_Cy5_006.nd2	2	Kc IF_pMT-Cap-H2-MBM-eGFP_CID Cy2 GFP Cy3_003.nd2	2	Kc IF_pMT-Cap-H2-dC23-eGFP_CID Cy2 GFP Cy3_002.nd2	2	Kc IF_Cid Cy2 and GFP Cy3_Cap-H2-MBMdC23-GFP_ Rep2_set1_005.nd2	2
3-27-14_Kc IF_pMT-eGFP_CID Cy2_GFP_Cy5_004.nd2	2	3-27-14_Kc IF_Cap-H2-eGFP_CID Cy2_GFP_Cy5_007.nd2	2	Kc IF_pMT-Cap-H2-MBM-eGFP_CID Cy2 GFP Cy3_good locali.nd2	2	Kc IF_pMT-Cap-H2-dC23-eGFP_CID Cy2 GFP Cy3_009.nd2	2	Kc IF_Cid Cy2 and GFP Cy3_Cap-H2-MBMdC23-GFP_ Rep2_set1_005.nd2	2
3-27-14_Kc IF_pMT-eGFP_CID Cy2_GFP_Cy5_004.nd2	2	3-27-14_Kc IF_Cap-H2-eGFP_CID Cy2_GFP_Cy5_locali1007.nd2	2	Kc IF_pMT-Cap-H2-MBM-eGFP_CID Cy2 GFP Cy3_good locali.nd2	2	Kc IF_pMT-Cap-H2-dC23-eGFP_CID Cy2 GFP Cy3_007.nd2	2	Kc IF_Cid Cy2 and GFP Cy3_Cap-H2-MBMdC23-GFP_ Rep2_set1_005.nd2	2
3-27-14_Kc IF_pMT-eGFP_CID Cy2_GFP_Cy5_005.nd2	2	3-25-14_Kc IF_Cap-h2-eGFP_CID Cy2_GFP_Cy5_locali1006.nd2	2	Kc IF_pMT-Cap-H2-MBM-eGFP_CID Cy2 GFP Cy3_good locali.nd2	2	Kc IF_Cid Cy2 and GFP Cy3_Cap-H2-dC2-GFP_ Rep3_setting1_006.nd2	3	Kc IF_Cid Cy2 and GFP Cy3_Cap-H2-MBMdC23-GFP_ Rep2_set1_005.nd2	2
3-27-14_Kc IF_pMT-eGFP_CID Cy2_GFP_Cy5_006.nd2	2	3-27-14_Kc IF_Cap-H2-eGFP_CID Cy2_GFP_Cy5_002.nd2	2	3-27-14_Kc IF_Cap-H2-MBM-eGFP_CID Cy2_GFP_Cy5_003.nd2	2	Kc IF_Cid Cy2 and GFP Cy3_Cap-H2-dC2-GFP_ Rep3_setting1_006.nd2	3	Kc IF_Cid Cy2 and GFP Cy3_Cap-H2-MBMdC23-GFP_ Rep2_set1_005.nd2	2
3-27-14_Kc IF_pMT-eGFP_CID Cy2_GFP_Cy5_006.nd2	2	3-27-14_Kc IF_Cap-H2-eGFP_CID Cy2_GFP_Cy5_003.nd2	2	3-27-14_Kc IF_Cap-H2-MBM-eGFP_CID Cy2_GFP_Cy5_003.nd2	2	Kc IF_Cid Cy2 and GFP Cy3_Cap-H2-dC2-GFP_ Rep3_setting1_006.nd2	3	Kc IF_Cid Cy2 and GFP Cy3_Cap-H2-MBMdC23-GFP_ Rep2_set1_005.nd2	2
3-27-14_Kc IF_pMT-eGFP_CID Cy2_GFP_Cy5_007.nd2	2	3-27-14_Kc IF_Cap-H2-eGFP_CID Cy2_GFP_Cy5_003.nd2	2	3-27-14_Kc IF_Cap-H2-MBM-eGFP_CID Cy2_GFP_Cy5_005.nd2	2	Kc IF_Cid Cy2 and GFP Cy3_Cap-H2-dC2-GFP_ Rep3_setting1_007.nd2	3	Kc IF_Cid Cy2 and GFP Cy3_Cap-H2-MBMdC23-GFP_ Rep2_set2_001.nd2	2
3-27-14_Kc IF_pMT-eGFP_CID Cy2_GFP_Cy5_008.nd2	2	3-27-14_Kc IF_Cap-H2-eGFP_CID Cy2_GFP_Cy5_003.nd2	2	3-27-14_Kc IF_Cap-H2-MBM-eGFP_CID Cy2_GFP_Cy5_005.nd2	2	Kc IF_Cid Cy2 and GFP Cy3_Cap-H2-dC2-GFP_ Rep3_setting1_007.nd2	3	Kc IF_Cid Cy2 and GFP Cy3_Cap-H2-MBMdC23-GFP_ Rep2_set2_002.nd2	2
3-27-14_Kc IF_pMT-eGFP_CID Cy2_GFP_Cy5_008.nd2	2	Kc IF_pMT-Cap-H2-eGFP_CID Cy2 GFP Cy3_004.nd2	3	3-27-14_Kc IF_Cap-H2-MBM-eGFP_CID Cy2_GFP_Cy5_005.nd2	2	Kc IF_Cid Cy2 and GFP Cy3_Cap-H2-dC2-GFP_ Rep3_setting1_001.nd2	3	Kc IF_Cid Cy2 and GFP Cy3_Cap-H2-MBMdC23-GFP_ Rep2_set2_005.nd2	2
3-27-14_Kc IF_pMT-eGFP_CID Cy2_GFP_Cy5_001.nd2	2	Kc IF_pMT-Cap-H2-eGFP_CID Cy2 GFP Cy3_004.nd2	3	3-27-14_Kc IF_Cap-H2-MBM-eGFP_CID Cy2_GFP_Cy5_006.nd2	2	Kc IF_Cid Cy2 and GFP Cy3_Cap-H2-dC2-GFP_ Rep3_setting1_001.nd2	3	Kc IF_Cid Cy2 and GFP Cy3_Cap-H2-MBMdC23-GFP_ Rep2_set2_006.nd2	2
3-27-14_Kc IF_pMT-eGFP_CID Cy2_GFP_Cy5_002.nd2	2	Kc IF_pMT-Cap-H2-eGFP_CID Cy2 GFP Cy3_004.nd2	3	3-27-14_Kc IF_Cap-H2-MBM-eGFP_CID Cy2_GFP_Cy5_006.nd2	2	Kc IF_Cid Cy2 and GFP Cy3_Cap-H2-dC23-GFP_ Rep3_set2_001.nd2	3	Kc IF_Cid Cy2 and GFP Cy3_Cap-H2-MBMdC23-GFP_ Rep2_set2_007.nd2	2
3-27-14_Kc IF_pMT-eGFP_CID Cy2_GFP_Cy5_002.nd2	2	Kc IF_pMT-Cap-H2-eGFP_CID Cy2 GFP Cy3_004.nd2	3	3-27-14_Kc IF_Cap-H2-MBM-eGFP_CID Cy2_GFP_Cy5_007.nd2	2	Kc IF_Cid Cy2 and GFP Cy3_Cap-H2-dC23-GFP_ Rep3_set2_001.nd2	3	Kc IF_Cid Cy2 and GFP Cy3_Cap-H2-MBMdC23-GFP_ Rep2_set2_007.nd2	2
3-27-14_Kc IF_pMT-eGFP_CID Cy2_GFP_Cy5_003.nd2	2	Kc IF_pMT-Cap-H2-eGFP_CID Cy2 GFP Cy3_004.nd2	3	3-27-14_Kc IF_Cap-H2-MBM-eGFP_CID Cy2_GFP_Cy5_008.nd2	2	Kc IF_Cid Cy2 and GFP Cy3_Cap-H2-dC23-GFP_ Rep3_set2_002.nd2	3	Kc IF_Cid Cy2 and GFP Cy3_Cap-H2-MBMdC23-GFP_ Rep2_set2_007.nd2	2
3-27-14_Kc IF_pMT-eGFP_CID Cy2_GFP_Cy5_003.nd2	2	Kc IF_pMT-Cap-H2-eGFP_CID Cy2 GFP Cy3_003.nd2	3	3-27-14_Kc IF_Cap-H2-MBM-eGFP_CID Cy2_GFP_Cy5_008.nd2	2	Kc IF_Cid Cy2 and GFP Cy3_Cap-H2-dC23-GFP_ Rep3_set2_002.nd2	3	3-25-14_Kc IF_Cap-h2-MBM-dC23-eGFP_CID Cy2_GFP_Cy5_005.nd2	3
3-27-14_Kc IF_pMT-eGFP_CID Cy2_GFP_Cy5_003.nd2	2	Kc IF_pMT-Cap-H2-eGFP_CID Cy2 GFP Cy3_003.nd2	3	3-27-14_Kc IF_Cap-H2-MBM-eGFP_CID Cy2_GFP_Cy5_008.nd2	2	Kc IF_Cid Cy2 and GFP Cy3_Cap-H2-dC23-GFP_ Rep3_set2_003.nd2	3	3-25-14_Kc IF_Cap-h2-MBM-dC23-eGFP_CID Cy2_GFP_Cy5_002.nd2	3
Kc IF_pMT-eGFP_CID Cy2 GFP Cy3_003.nd2	3	Kc IF_pMT-Cap-H2-eGFP_CID Cy2 GFP Cy3_002.nd2	3	3-25-14_Kc IF_Cap-h2-MBM-eGFP_CID Cy2_GFP_Cy5_locali1004.nd2	2	Kc IF_Cid Cy2 and GFP Cy3_Cap-H2-dC23-GFP_ Rep3_set2_003.nd2	3	3-25-14_Kc IF_Cap-h2-MBM-dC23-eGFP_CID Cy2_GFP_Cy5_007.nd2	3
Kc IF_pMT-eGFP_CID Cy2 GFP Cy3_003.nd2	3	Kc IF_pMT-Cap-H2-eGFP_CID Cy2 GFP Cy3_001.nd2	3	3-25-14_Kc IF_Cap-h2-MBM-eGFP_CID Cy2_GFP_Cy5_locali1004.nd2	2	Kc IF_Cid Cy2 and GFP Cy3_Cap-H2-dC23-GFP_ Rep3_set2_003.nd2	3	3-25-14_Kc IF_Cap-h2-MBM-dC23-eGFP_CID Cy2_GFP_Cy5_005.nd2	3
Kc IF_pMT-eGFP_CID Cy2 GFP Cy3_003.nd2	3	Kc IF_pMT-Cap-H2-eGFP_CID Cy2 GFP Cy3_001.nd2	3	3-25-14_Kc IF_Cap-h2-MBM-eGFP_CID Cy2_GFP_Cy5_locali1004.nd2	2	Kc IF_Cid Cy2 and GFP Cy3_Cap-H2-dC23-GFP_ Rep3_set2_004.nd2	3	3-25-14_Kc IF_Cap-h2-MBM-dC23-eGFP_CID Cy2_GFP_Cy5_001.nd2	3
Kc IF_pMT-eGFP_CID Cy2 GFP Cy3_003.nd2	3	Kc IF_pMT-Cap-H2-eGFP_CID Cy2 GFP Cy3_005.nd2	3	3-25-14_Kc IF_Cap-h2-MBM-eGFP_CID Cy2_GFP_Cy5_locali1005.nd2	2	Kc IF_Cid Cy2 and GFP Cy3_Cap-H2-dC23-GFP_ Rep3_set2_005.nd2	3	3-25-14_Kc IF_Cap-h2-MBM-dC23-eGFP_CID Cy2_GFP_Cy5_005.nd2	3
Kc IF_pMT-eGFP_CID Cy2 GFP Cy3_002.nd2	3	Kc IF_pMT-Cap-H2-eGFP_CID Cy2 GFP Cy3_005.nd2	3	3-27-14_Kc IF_Cap-H2-MBM-eGFP_CID Cy2_GFP_Cy5_001.nd2	2	Kc IF_Cid Cy2 and GFP Cy3_Cap-H2-dC23-GFP_ Rep3_set2_005.nd2	3	3-25-14_Kc IF_Cap-h2-MBM-dC23-eGFP_CID Cy2_GFP_Cy5_007.nd2	3
Kc IF_pMT-eGFP_CID Cy2 GFP Cy3_002.nd2	3	Kc IF_pMT-Cap-H2-eGFP_CID Cy2 GFP Cy3_005.nd2	3	3-27-14_Kc IF_Cap-H2-MBM-eGFP_CID Cy2_GFP_Cy5_001.nd2	2	Kc IF_Cid Cy2 and GFP Cy3_Cap-H2-dC23-GFP_ Rep3_set2_006.nd2	3	3-25-14_Kc IF_Cap-h2-MBM-dC23-eGFP_CID Cy2_GFP_Cy5_006.nd2	3
Kc IF_pMT-eGFP_CID Cy2 GFP Cy3_002.nd2	3	Kc IF_pMT-Cap-H2-eGFP_CID Cy2 GFP Cy3_005.nd2	3	3-27-14_Kc IF_Cap-H2-MBM-eGFP_CID Cy2_GFP_Cy5_001.nd2	2	Kc IF_Cid Cy2 and GFP Cy3_Cap-H2-dC23-GFP_ Rep3_set2_006.nd2	3	3-25-14_Kc IF_Cap-h2-MBM-dC23-eGFP_CID Cy2_GFP_Cy5_007.nd2	3
Kc IF_pMT-eGFP_CID Cy2 GFP Cy3_002.nd2	3	Kc IF_pMT-Cap-H2-eGFP_CID Cy2 GFP Cy3_005.nd2	3	3-27-14_Kc IF_Cap-H2-MBM-eGFP_CID Cy2_GFP_Cy5_001.nd2	2	Kc IF_Cid Cy2 and GFP Cy3_Cap-H2-dC23-GFP_ Rep3_set2_006.nd2	3	3-25-14_Kc IF_Cap-h2-MBdC23-eGFP_CID Cy2_GFP_Cy5_locali1003.nd2	3
Kc IF_pMT-eGFP_CID Cy2 GFP Cy3_001.nd2	3	Kc IF_pMT-Cap-H2-eGFP_CID Cy2 GFP Cy3_007.nd2	3	3-27-14_Kc IF_Cap-H2-MBM-eGFP_CID Cy2_GFP_Cy5_001.nd2	2	Kc IF_Cid Cy2 and GFP Cy3_Cap-H2-dC23-GFP_ Rep3_set2_006.nd2	3	3-25-14_Kc IF_Cap-h2-MBdC23-eGFP_CID Cy2_GFP_Cy5_locali1003.nd2	3
Kc IF_pMT-eGFP_CID Cy2 GFP Cy3_001.nd2	3	Kc IF_pMT-Cap-H2-eGFP_CID Cy2 GFP Cy3_007.nd2	3	3-27-14_Kc IF_Cap-H2-MBM-eGFP_CID Cy2_GFP_Cy5_001.nd2	2	Kc IF_Cid Cy2 and GFP Cy3_Cap-H2-dC23-GFP_ Rep3_set2_007.nd2	3	3-25-14_Kc IF_Cap-h2-MBdC23-eGFP_CID Cy2_GFP_Cy5_locali1003.nd2	3
Kc IF_pMT-eGFP_CID Cy2 GFP Cy3_001.nd2	3	Kc IF_pMT-Cap-H2-eGFP_CID Cy2 GFP Cy3_007.nd2	3	Kc IF_pMT-Cap-H2-MBM-eGFP_CID Cy2 GFP Cy3_001.nd2	3	Kc IF_Cid Cy2 and GFP Cy3_Cap-H2-dC23-GFP_ Rep3_set2_007.nd2	3	3-25-14_Kc IF_Cap-h2-MBM-dC23-eGFP_CID Cy2_GFP_Cy5_008.nd2	3
Kc IF_pMT-eGFP_CID Cy2 GFP Cy3_001.nd2	3	Kc IF_pMT-Cap-H2-eGFP_CID Cy2 GFP Cy3_007.nd2	3	Kc IF_pMT-Cap-H2-MBM-eGFP_CID Cy2 GFP Cy3_009.nd2	3	Kc IF_Cid Cy2 and GFP Cy3_Cap-H2-dC23-GFP_ Rep3_set2_007.nd2	3	3-25-14_Kc IF_Cap-h2-MBM-dC23-eGFP_CID Cy2_GFP_Cy5_007.nd2	3
Kc IF_pMT-eGFP_CID Cy2 GFP Cy3_001.nd2	3	Kc IF_pMT-Cap-H2-eGFP_CID Cy2 GFP Cy3_007.nd2	3	Kc IF_pMT-Cap-H2-MBM-eGFP_CID Cy2 GFP Cy3_009.nd2	3	Kc IF_Cid Cy2 and GFP Cy3_Cap-H2-dC23-GFP_ Rep3_set2_008.nd2	3	3-25-14_Kc IF_Cap-h2-MBdC23-eGFP_CID Cy2_GFP_Cy5_locali1003.nd2	3
Kc IF_pMT-eGFP_CID Cy2 GFP Cy3_good locali004.nd2	3	Kc IF_pMT-Cap-H2-eGFP_CID Cy2 GFP Cy3_006.nd2	3	Kc IF_pMT-Cap-H2-MBM-eGFP_CID Cy2 GFP Cy3_009.nd2	3	Kc IF_Cid Cy2 and GFP Cy3_Cap-H2-dC23-GFP_ Rep3_set2_008.nd2	3	Kc IF_Cid Cy2 and GFP Cy3_Cap-H2-MBMdC23-GFP_ Rep3_set1_001.nd2	3
Kc IF_pMT-eGFP_CID Cy2 GFP Cy3_good locali004.nd2	3	Kc IF_pMT-Cap-H2-eGFP_CID Cy2 GFP Cy3_006.nd2	3	Kc IF_pMT-Cap-H2-MBM-eGFP_CID Cy2 GFP Cy3_004.nd2	3	Kc IF_Cid Cy2 and GFP Cy3_Cap-H2-dC23-GFP_ Rep3_set2_008.nd2	3	Kc IF_Cid Cy2 and GFP Cy3_Cap-H2-MBMdC23-GFP_ Rep3_set1_001.nd2	3
Kc IF_pMT-eGFP_CID Cy2 GFP Cy3_008.nd2	3	Kc IF_pMT-Cap-H2-eGFP_CID Cy2 GFP Cy3_006.nd2	3	Kc IF_pMT-Cap-H2-MBM-eGFP_CID Cy2 GFP Cy3_008.nd2	3	Kc IF_Cid Cy2 and GFP Cy3_Cap-H2-dC23-GFP_ Rep3_set2_008.nd2	3	Kc IF_Cid Cy2 and GFP Cy3_Cap-H2-MBMdC23-GFP_ Rep3_set1_001.nd2	3
Kc IF_pMT-eGFP_CID Cy2 GFP Cy3_008.nd2	3	Kc IF_pMT-Cap-H2-eGFP_CID Cy2 GFP Cy3_006.nd2	3	Kc IF_pMT-Cap-H2-MBM-eGFP_CID Cy2 GFP Cy3_008.nd2	3	Kc IF_Cid Cy2 and GFP Cy3_Cap-H2-dC23-GFP_ Rep3_set2_008.nd2	3	Kc IF_Cid Cy2 and GFP Cy3_Cap-H2-MBMdC23-GFP_ Rep3_set1_001.nd2	3
Kc IF_pMT-eGFP_CID Cy2 GFP Cy3_008.nd2	3	Kc IF_pMT-Cap-H2-eGFP_CID Cy2 GFP Cy3_006.nd2	3	Kc IF_pMT-Cap-H2-MBM-eGFP_CID Cy2 GFP Cy3_008.nd2	3	Kc IF_Cid Cy2 and GFP Cy3_Cap-H2-dC2-GFP_ Rep3_setting1_001.nd2	3	Kc IF_Cid Cy2 and GFP Cy3_Cap-H2-MBMdC23-GFP_ Rep3_set1_002.nd2	3
Kc IF_pMT-eGFP_CID Cy2 GFP Cy3_007.nd2	3	Kc IF_pMT-Cap-H2-eGFP_CID Cy2 GFP Cy3_good locali003.nd2	3	Kc IF_pMT-Cap-H2-MBM-eGFP_CID Cy2 GFP Cy3_008.nd2	3	Kc IF_Cid Cy2 and GFP Cy3_Cap-H2-dC2-GFP_ Rep3_setting1_001.nd2	3	Kc IF_Cid Cy2 and GFP Cy3_Cap-H2-MBMdC23-GFP_ Rep3_set1_002.nd2	3
Kc IF_pMT-eGFP_CID Cy2 GFP Cy3_007.nd2	3	Kc IF_pMT-Cap-H2-eGFP_CID Cy2 GFP Cy3_good locali003.nd2	3	Kc IF_pMT-Cap-H2-MBM-eGFP_CID Cy2 GFP Cy3_008.nd2	3	Kc IF_Cid Cy2 and GFP Cy3_Cap-H2-dC2-GFP_ Rep3_setting1_001.nd2	3	Kc IF_Cid Cy2 and GFP Cy3_Cap-H2-MBMdC23-GFP_ Rep3_set1_002.nd2	3
Kc IF_pMT-eGFP_CID Cy2 GFP Cy3_007.nd2	3	Kc IF_pMT-Cap-H2-eGFP_CID Cy2 GFP Cy3_good locali003.nd2	3	Kc IF_pMT-Cap-H2-MBM-eGFP_CID Cy2 GFP Cy3_008.nd2	3	Kc IF_Cid Cy2 and GFP Cy3_Cap-H2-dC2-GFP_ Rep3_setting1_006.nd2	3	Kc IF_Cid Cy2 and GFP Cy3_Cap-H2-MBMdC23-GFP_ Rep3_set1_003.nd2	3
Kc IF_pMT-eGFP_CID Cy2 GFP Cy3_006.nd2	3	Kc IF_pMT-Cap-H2-eGFP_CID Cy2 GFP Cy3_good locali003.nd2	3	Kc IF_pMT-Cap-H2-MBM-eGFP_CID Cy2 GFP Cy3_008.nd2	3	Kc IF_Cid Cy2 and GFP Cy3_Cap-H2-dC2-GFP_ Rep3_setting1_006.nd2	3	Kc IF_Cid Cy2 and GFP Cy3_Cap-H2-MBMdC23-GFP_ Rep3_set1_003.nd2	3
Kc IF_pMT-eGFP_CID Cy2 GFP Cy3_006.nd2	3	Kc IF_pMT-Cap-H2-eGFP_CID Cy2 GFP Cy3_008.nd2	3	Kc IF_pMT-Cap-H2-MBM-eGFP_CID Cy2 GFP Cy3_005.nd2	3	Kc IF_Cid Cy2 and GFP Cy3_Cap-H2-dC2-GFP_ Rep3_setting1_006.nd2	3	Kc IF_Cid Cy2 and GFP Cy3_Cap-H2-MBMdC23-GFP_ Rep3_set1_004.nd2	3
Kc IF_pMT-eGFP_CID Cy2 GFP Cy3_006.nd2	3	Kc IF_pMT-Cap-H2-eGFP_CID Cy2 GFP Cy3_008.nd2	3	Kc IF_pMT-Cap-H2-MBM-eGFP_CID Cy2 GFP Cy3_005.nd2	3	Kc IF_Cid Cy2 and GFP Cy3_Cap-H2-dC2-GFP_ Rep3_setting1_006.nd2	3	Kc IF_Cid Cy2 and GFP Cy3_Cap-H2-MBMdC23-GFP_ Rep3_set1_004.nd2	3
Kc IF_pMT-eGFP_CID Cy2 GFP Cy3_006.nd2	3	Kc IF_pMT-Cap-H2-eGFP_CID Cy2 GFP Cy3_008.nd2	3	Kc IF_pMT-Cap-H2-MBM-eGFP_CID Cy2 GFP Cy3_005.nd2	3	3-25-14_Kc IF_CID Cy2_GFP_Cy5_007.nd2	3	Kc IF_Cid Cy2 and GFP Cy3_Cap-H2-MBMdC23-GFP_ Rep3_set1_004.nd2	3
Kc IF_pMT-eGFP_CID Cy2 GFP Cy3_005.nd2	3	Kc IF_pMT-Cap-H2-eGFP_CID Cy2 GFP Cy3_008.nd2	3	Kc IF_pMT-Cap-H2-MBM-eGFP_CID Cy2 GFP Cy3_005.nd2	3	3-25-14_Kc IF_CID Cy2_GFP_Cy5_002.nd2	3	Kc IF_Cid Cy2 and GFP Cy3_Cap-H2-MBMdC23-GFP_ Rep3_set1_004.nd2	3
Kc IF_pMT-eGFP_CID Cy2 GFP Cy3_005.nd2	3	3-27-14_Kc IF_Cap-H2-eGFP_CID Cy2_GFP_Cy5_004.nd2	3	Kc IF_pMT-Cap-H2-MBM-eGFP_CID Cy2 GFP Cy3_005.nd2	3	3-25-14_Kc IF_CID Cy2_GFP_Cy5_003.nd2	3	Kc IF_Cid Cy2 and GFP Cy3_Cap-H2-MBMdC23-GFP_ Rep3_set1_004.nd2	3
Kc IF_pMT-eGFP_CID Cy2 GFP Cy3_005.nd2	3	3-27-14_Kc IF_Cap-H2-eGFP_CID Cy2_GFP_Cy5_004.nd2	3	Kc IF_pMT-Cap-H2-MBM-eGFP_CID Cy2 GFP Cy3_005.nd2	3	3-25-14_Kc IF_CID Cy2_GFP_Cy5_002.nd2	3	Kc IF_Cid Cy2 and GFP Cy3_Cap-H2-MBMdC23-GFP_ Rep3_set1_004.nd2	3
Kc IF_pMT-eGFP_CID Cy2 GFP Cy3_005.nd2	3	3-27-14_Kc IF_Cap-H2-eGFP_CID Cy2_GFP_Cy5_004.nd2	3	Kc IF_pMT-Cap-H2-MBM-eGFP_CID Cy2 GFP Cy3_005.nd2	3	3-25-14_Kc IF_CID Cy2_GFP_Cy5_003.nd2	3	Kc IF_Cid Cy2 and GFP Cy3_Cap-H2-MBMdC23-GFP_ Rep3_set2_001.nd2	3
Kc IF_pMT-eGFP_CID Cy2 GFP Cy3_005.nd2	3	3-27-14_Kc IF_Cap-H2-eGFP_CID Cy2_GFP_Cy5_004.nd2	3	Kc IF_pMT-Cap-H2-MBM-eGFP_CID Cy2 GFP Cy3_005.nd2	3	3-25-14_Kc IF_CID Cy2_GFP_Cy5_008.nd2	3	Kc IF_Cid Cy2 and GFP Cy3_Cap-H2-MBMdC23-GFP_ Rep3_set2_001.nd2	3
Kc IF_pMT-eGFP_CID Cy2 GFP Cy3_005.nd2	3	3-27-14_Kc IF_Cap-H2-eGFP_CID Cy2_GFP_Cy5_005.nd2	3	Kc IF_pMT-Cap-H2-MBM-eGFP_CID Cy2 GFP Cy3_005.nd2	3	3-25-14_Kc IF_CID Cy2_GFP_Cy5_008.nd2	3	Kc IF_Cid Cy2 and GFP Cy3_Cap-H2-MBMdC23-GFP_ Rep3_set2_001.nd2	3
Kc IF_pMT-eGFP_CID Cy2 GFP Cy3_005.nd2	3	3-27-14_Kc IF_Cap-H2-eGFP_CID Cy2_GFP_Cy5_005.nd2	3	Kc IF_pMT-Cap-H2-MBM-eGFP_CID Cy2 GFP Cy3_005.nd2	3	3-25-14_Kc IF_Cap-h2-dC23-eGFP_CID Cy2_GFP_Cy5_locali1002.nd2	3	Kc IF_Cid Cy2 and GFP Cy3_Cap-H2-MBMdC23-GFP_ Rep3_set2_001.nd2	3
Kc IF_pMT-eGFP_CID Cy2 GFP Cy3_005.nd2	3	3-27-14_Kc IF_Cap-H2-eGFP_CID Cy2_GFP_Cy5_005.nd2	3	Kc IF_pMT-Cap-H2-MBM-eGFP_CID Cy2 GFP Cy3_005.nd2	3	3-25-14_Kc IF_CID Cy2_GFP_Cy5_004.nd2	3	Kc IF_Cid Cy2 and GFP Cy3_Cap-H2-MBMdC23-GFP_ Rep3_set2_001.nd2	3
Kc IF_pMT-eGFP_CID Cy2 GFP Cy3_005.nd2	3	3-27-14_Kc IF_Cap-H2-eGFP_CID Cy2_GFP_Cy5_006.nd2	3	Kc IF_pMT-Cap-H2-MBM-eGFP_CID Cy2 GFP Cy3_005.nd2	3	3-25-14_Kc IF_CID Cy2_GFP_Cy5_008.nd2	3	Kc IF_Cid Cy2 and GFP Cy3_Cap-H2-MBMdC23-GFP_ Rep3_set2_001.nd2	3
Kc IF_pMT-eGFP_CID Cy2 GFP Cy3_005.nd2	3	3-27-14_Kc IF_Cap-H2-eGFP_CID Cy2_GFP_Cy5_006.nd2	3	Kc IF_pMT-Cap-H2-MBM-eGFP_CID Cy2 GFP Cy3_006.nd2	3	Kc IF_pMT-Cap-H2-dC23-eGFP_CID Cy2 GFP Cy3_003.nd2	3	Kc IF_Cid Cy2 and GFP Cy3_Cap-H2-MBMdC23-GFP_ Rep3_set2_002.nd2	3
Kc IF_pMT-eGFP_CID Cy2 GFP Cy3_004.nd2	3	3-27-14_Kc IF_Cap-H2-eGFP_CID Cy2_GFP_Cy5_007.nd2	3	Kc IF_pMT-Cap-H2-MBM-eGFP_CID Cy2 GFP Cy3_006.nd2	3	Kc IF_pMT-Cap-H2-dC23-eGFP_CID Cy2 GFP Cy3_003.nd2	3	Kc IF_Cid Cy2 and GFP Cy3_Cap-H2-MBMdC23-GFP_ Rep3_set2_002.nd2	3
Kc IF_pMT-eGFP_CID Cy2 GFP Cy3_004.nd2	3	3-27-14_Kc IF_Cap-H2-eGFP_CID Cy2_GFP_Cy5_007.nd2	3	Kc IF_pMT-Cap-H2-MBM-eGFP_CID Cy2 GFP Cy3_007.nd2	3	Kc IF_pMT-Cap-H2-dC23-eGFP_CID Cy2 GFP Cy3_009.nd2	3	Kc IF_Cid Cy2 and GFP Cy3_Cap-H2-MBMdC23-GFP_ Rep3_set2_002.nd2	3
Kc IF_pMT-eGFP_CID Cy2 GFP Cy3_004.nd2	3	3-27-14_Kc IF_Cap-H2-eGFP_CID Cy2_GFP_Cy5_007.nd2	3	Kc IF_pMT-Cap-H2-MBM-eGFP_CID Cy2 GFP Cy3_007.nd2	3	Kc IF_pMT-Cap-H2-dC23-eGFP_CID Cy2 GFP Cy3_001.nd2	3	Kc IF_Cid Cy2 and GFP Cy3_Cap-H2-MBMdC23-GFP_ Rep3_set2_003.nd2	3
Kc IF_pMT-eGFP_CID Cy2 GFP Cy3_004.nd2	3	3-27-14_Kc IF_Cap-H2-eGFP_CID Cy2_GFP_Cy5_008.nd2	3	Kc IF_pMT-Cap-H2-MBM-eGFP_CID Cy2 GFP Cy3_007.nd2	3	Kc IF_pMT-Cap-H2-dC23-eGFP_CID Cy2 GFP Cy3_good locali001.nd2	3	Kc IF_Cid Cy2 and GFP Cy3_Cap-H2-MBMdC23-GFP_ Rep3_set2_003.nd2	3
3-27-14_Kc IF_pMT-eGFP_CID Cy2_GFP_Cy5_004.nd2	3	3-27-14_Kc IF_Cap-H2-eGFP_CID Cy2_GFP_Cy5_008.nd2	3	Kc IF_pMT-Cap-H2-MBM-eGFP_CID Cy2 GFP Cy3_007.nd2	3	Kc IF_pMT-Cap-H2-dC23-eGFP_CID Cy2 GFP Cy3_001.nd2	3	Kc IF_Cid Cy2 and GFP Cy3_Cap-H2-MBMdC23-GFP_ Rep3_set2_003.nd2	3
3-27-14_Kc IF_pMT-eGFP_CID Cy2_GFP_Cy5_004.nd2	3	3-27-14_Kc IF_Cap-H2-eGFP_CID Cy2_GFP_Cy5_008.nd2	3	Kc IF_pMT-Cap-H2-MBM-eGFP_CID Cy2 GFP Cy3_007.nd2	3	Kc IF_pMT-Cap-H2-dC23-eGFP_CID Cy2 GFP Cy3_007.nd2	3	Kc IF_Cid Cy2 and GFP Cy3_Cap-H2-MBMdC23-GFP_ Rep3_set2_004.nd2	3
3-27-14_Kc IF_pMT-eGFP_CID Cy2_GFP_Cy5_004.nd2	3	3-27-14_Kc IF_Cap-H2-eGFP_CID Cy2_GFP_Cy5_008.nd2	3	Kc IF_pMT-Cap-H2-MBM-eGFP_CID Cy2 GFP Cy3_002.nd2	3	Kc IF_pMT-Cap-H2-dC23-eGFP_CID Cy2 GFP Cy3_good locali001.nd2	3	Kc IF_Cid Cy2 and GFP Cy3_Cap-H2-MBMdC23-GFP_ Rep3_set2_004.nd2	3
3-27-14_Kc IF_pMT-eGFP_CID Cy2_GFP_Cy5_004.nd2	3	3-27-14_Kc IF_Cap-H2-eGFP_CID Cy2_GFP_Cy5_locali1007.nd2	3	Kc IF_pMT-Cap-H2-MBM-eGFP_CID Cy2 GFP Cy3_002.nd2	3	Kc IF_pMT-Cap-H2-dC23-eGFP_CID Cy2 GFP Cy3_006.nd2	3	Kc IF_Cid Cy2 and GFP Cy3_Cap-H2-MBMdC23-GFP_ Rep3_set2_005.nd2	3
3-27-14_Kc IF_pMT-eGFP_CID Cy2_GFP_Cy5_004.nd2	3	3-27-14_Kc IF_Cap-H2-eGFP_CID Cy2_GFP_Cy5_locali1007.nd2	3	Kc IF_pMT-Cap-H2-MBM-eGFP_CID Cy2 GFP Cy3_002.nd2	3	Kc IF_pMT-Cap-H2-dC23-eGFP_CID Cy2 GFP Cy3_009.nd2	3	Kc IF_Cid Cy2 and GFP Cy3_Cap-H2-MBMdC23-GFP_ Rep3_set2_005.nd2	3
3-27-14_Kc IF_pMT-eGFP_CID Cy2_GFP_Cy5_004.nd2	3	3-27-14_Kc IF_Cap-H2-eGFP_CID Cy2_GFP_Cy5_locali1007.nd2	3	Kc IF_pMT-Cap-H2-MBM-eGFP_CID Cy2 GFP Cy3_002.nd2	3	Kc IF_pMT-Cap-H2-dC23-eGFP_CID Cy2 GFP Cy3_good locali002.nd2	3	Kc IF_Cid Cy2 and GFP Cy3_Cap-H2-MBMdC23-GFP_ Rep3_set2_005.nd2	3
3-27-14_Kc IF_pMT-eGFP_CID Cy2_GFP_Cy5_004.nd2	3	3-25-14_Kc IF_Cap-h2-eGFP_CID Cy2_GFP_Cy5_locali1006.nd2	3	Kc IF_pMT-Cap-H2-MBM-eGFP_CID Cy2 GFP Cy3_002.nd2	3	Kc IF_Cid Cy2 and GFP Cy3_Cap-H2-dC2-GFP_ Rep3_setting1_006.nd2	4	Kc IF_Cid Cy2 and GFP Cy3_Cap-H2-MBMdC23-GFP_ Rep3_set2_005.nd2	3
3-27-14_Kc IF_pMT-eGFP_CID Cy2_GFP_Cy5_004.nd2	3	3-27-14_Kc IF_Cap-H2-eGFP_CID Cy2_GFP_Cy5_002.nd2	3	Kc IF_pMT-Cap-H2-MBM-eGFP_CID Cy2 GFP Cy3_002.nd2	3	Kc IF_Cid Cy2 and GFP Cy3_Cap-H2-dC2-GFP_ Rep3_setting1_006.nd2	4	Kc IF_Cid Cy2 and GFP Cy3_Cap-H2-MBMdC23-GFP_ Rep3_set2_006.nd2	3
3-27-14_Kc IF_pMT-eGFP_CID Cy2_GFP_Cy5_004.nd2	3	3-27-14_Kc IF_Cap-H2-eGFP_CID Cy2_GFP_Cy5_002.nd2	3	Kc IF_pMT-Cap-H2-MBM-eGFP_CID Cy2 GFP Cy3_002.nd2	3	Kc IF_Cid Cy2 and GFP Cy3_Cap-H2-dC2-GFP_ Rep3_setting1_006.nd2	4	Kc IF_Cid Cy2 and GFP Cy3_Cap-H2-MBMdC23-GFP_ Rep3_set2_006.nd2	3
3-27-14_Kc IF_pMT-eGFP_CID Cy2_GFP_Cy5_005.nd2	3	3-27-14_Kc IF_Cap-H2-eGFP_CID Cy2_GFP_Cy5_002.nd2	3	Kc IF_pMT-Cap-H2-MBM-eGFP_CID Cy2 GFP Cy3_002.nd2	3	Kc IF_Cid Cy2 and GFP Cy3_Cap-H2-dC2-GFP_ Rep3_setting1_006.nd2	4	Kc IF_Cid Cy2 and GFP Cy3_Cap-H2-MBMdC23-GFP_ Rep3_set2_006.nd2	3
3-27-14_Kc IF_pMT-eGFP_CID Cy2_GFP_Cy5_005.nd2	3	3-27-14_Kc IF_Cap-H2-eGFP_CID Cy2_GFP_Cy5_003.nd2	3	Kc IF_pMT-Cap-H2-MBM-eGFP_CID Cy2 GFP Cy3_002.nd2	3	Kc IF_Cid Cy2 and GFP Cy3_Cap-H2-dC2-GFP_ Rep3_setting1_006.nd2	4	Kc IF_Cid Cy2 and GFP Cy3_Cap-H2-MBMdC23-GFP_ Rep3_set2_006.nd2	3
3-27-14_Kc IF_pMT-eGFP_CID Cy2_GFP_Cy5_005.nd2	3	Kc IF_pMT-Cap-H2-eGFP_CID Cy2 GFP Cy3_004.nd2	4	Kc IF_pMT-Cap-H2-MBM-eGFP_CID Cy2 GFP Cy3_002.nd2	3	Kc IF_Cid Cy2 and GFP Cy3_Cap-H2-dC2-GFP_ Rep3_setting1_007.nd2	4	Kc IF_Cid Cy2 and GFP Cy3_Cap-H2-MBMdC23-GFP_ Rep3_set2_006.nd2	3
3-27-14_Kc IF_pMT-eGFP_CID Cy2_GFP_Cy5_006.nd2	3	Kc IF_pMT-Cap-H2-eGFP_CID Cy2 GFP Cy3_004.nd2	4	Kc IF_pMT-Cap-H2-MBM-eGFP_CID Cy2 GFP Cy3_003.nd2	3	Kc IF_Cid Cy2 and GFP Cy3_Cap-H2-dC2-GFP_ Rep3_setting1_007.nd2	4	Kc IF_Cid Cy2 and GFP Cy3_Cap-H2-MBMdC23-GFP_ Rep2_set1_001.nd2	3
3-27-14_Kc IF_pMT-eGFP_CID Cy2_GFP_Cy5_006.nd2	3	Kc IF_pMT-Cap-H2-eGFP_CID Cy2 GFP Cy3_004.nd2	4	Kc IF_pMT-Cap-H2-MBM-eGFP_CID Cy2 GFP Cy3_good locali.nd2	3	Kc IF_Cid Cy2 and GFP Cy3_Cap-H2-dC2-GFP_ Rep3_setting1_007.nd2	4	Kc IF_Cid Cy2 and GFP Cy3_Cap-H2-MBMdC23-GFP_ Rep2_set1_001.nd2	3
3-27-14_Kc IF_pMT-eGFP_CID Cy2_GFP_Cy5_006.nd2	3	Kc IF_pMT-Cap-H2-eGFP_CID Cy2 GFP Cy3_004.nd2	4	Kc IF_pMT-Cap-H2-MBM-eGFP_CID Cy2 GFP Cy3_good locali.nd2	3	Kc IF_Cid Cy2 and GFP Cy3_Cap-H2-dC2-GFP_ Rep3_setting1_008.nd2	4	Kc IF_Cid Cy2 and GFP Cy3_Cap-H2-MBMdC23-GFP_ Rep2_set1_001.nd2	3
3-27-14_Kc IF_pMT-eGFP_CID Cy2_GFP_Cy5_007.nd2	3	Kc IF_pMT-Cap-H2-eGFP_CID Cy2 GFP Cy3_004.nd2	4	Kc IF_pMT-Cap-H2-MBM-eGFP_CID Cy2 GFP Cy3_good locali.nd2	3	Kc IF_Cid Cy2 and GFP Cy3_Cap-H2-dC2-GFP_ Rep3_setting1_008.nd2	4	Kc IF_Cid Cy2 and GFP Cy3_Cap-H2-MBMdC23-GFP_ Rep2_set1_001.nd2	3
3-27-14_Kc IF_pMT-eGFP_CID Cy2_GFP_Cy5_007.nd2	3	Kc IF_pMT-Cap-H2-eGFP_CID Cy2 GFP Cy3_004.nd2	4	Kc IF_pMT-Cap-H2-MBM-eGFP_CID Cy2 GFP Cy3_good locali.nd2	3	Kc IF_Cid Cy2 and GFP Cy3_Cap-H2-dC2-GFP_ Rep3_setting1_008.nd2	4	Kc IF_Cid Cy2 and GFP Cy3_Cap-H2-MBMdC23-GFP_ Rep2_set1_001.nd2	3
3-27-14_Kc IF_pMT-eGFP_CID Cy2_GFP_Cy5_007.nd2	3	Kc IF_pMT-Cap-H2-eGFP_CID Cy2 GFP Cy3_003.nd2	4	Kc IF_pMT-Cap-H2-MBM-eGFP_CID Cy2 GFP Cy3_good locali.nd2	3	Kc IF_Cid Cy2 and GFP Cy3_Cap-H2-dC2-GFP_ Rep3_setting1_001.nd2	4	Kc IF_Cid Cy2 and GFP Cy3_Cap-H2-MBMdC23-GFP_ Rep2_set1_001.nd2	3
3-27-14_Kc IF_pMT-eGFP_CID Cy2_GFP_Cy5_008.nd2	3	Kc IF_pMT-Cap-H2-eGFP_CID Cy2 GFP Cy3_003.nd2	4	3-27-14_Kc IF_Cap-H2-MBM-eGFP_CID Cy2_GFP_Cy5_002.nd2	3	Kc IF_Cid Cy2 and GFP Cy3_Cap-H2-dC2-GFP_ Rep3_setting1_001.nd2	4	Kc IF_Cid Cy2 and GFP Cy3_Cap-H2-MBMdC23-GFP_ Rep2_set1_004.nd2	3
3-27-14_Kc IF_pMT-eGFP_CID Cy2_GFP_Cy5_008.nd2	3	Kc IF_pMT-Cap-H2-eGFP_CID Cy2 GFP Cy3_003.nd2	4	3-27-14_Kc IF_Cap-H2-MBM-eGFP_CID Cy2_GFP_Cy5_002.nd2	3	Kc IF_Cid Cy2 and GFP Cy3_Cap-H2-dC2-GFP_ Rep3_setting1_001.nd2	4	Kc IF_Cid Cy2 and GFP Cy3_Cap-H2-MBMdC23-GFP_ Rep2_set1_004.nd2	3
3-27-14_Kc IF_pMT-eGFP_CID Cy2_GFP_Cy5_008.nd2	3	Kc IF_pMT-Cap-H2-eGFP_CID Cy2 GFP Cy3_003.nd2	4	3-27-14_Kc IF_Cap-H2-MBM-eGFP_CID Cy2_GFP_Cy5_003.nd2	3	Kc IF_Cid Cy2 and GFP Cy3_Cap-H2-dC2-GFP_ Rep3_setting1_001.nd2	4	Kc IF_Cid Cy2 and GFP Cy3_Cap-H2-MBMdC23-GFP_ Rep2_set1_004.nd2	3
3-27-14_Kc IF_pMT-eGFP_CID Cy2_GFP_Cy5_001.nd2	3	Kc IF_pMT-Cap-H2-eGFP_CID Cy2 GFP Cy3_002.nd2	4	3-27-14_Kc IF_Cap-H2-MBM-eGFP_CID Cy2_GFP_Cy5_003.nd2	3	Kc IF_Cid Cy2 and GFP Cy3_Cap-H2-dC2-GFP_ Rep3_setting1_001.nd2	4	Kc IF_Cid Cy2 and GFP Cy3_Cap-H2-MBMdC23-GFP_ Rep2_set1_004.nd2	3
3-27-14_Kc IF_pMT-eGFP_CID Cy2_GFP_Cy5_001.nd2	3	Kc IF_pMT-Cap-H2-eGFP_CID Cy2 GFP Cy3_002.nd2	4	3-27-14_Kc IF_Cap-H2-MBM-eGFP_CID Cy2_GFP_Cy5_003.nd2	3	Kc IF_Cid Cy2 and GFP Cy3_Cap-H2-dC2-GFP_ Rep3_setting1_001.nd2	4	Kc IF_Cid Cy2 and GFP Cy3_Cap-H2-MBMdC23-GFP_ Rep2_set1_005.nd2	3
3-27-14_Kc IF_pMT-eGFP_CID Cy2_GFP_Cy5_001.nd2	3	Kc IF_pMT-Cap-H2-eGFP_CID Cy2 GFP Cy3_002.nd2	4	3-27-14_Kc IF_Cap-H2-MBM-eGFP_CID Cy2_GFP_Cy5_003.nd2	3	Kc IF_Cid Cy2 and GFP Cy3_Cap-H2-dC23-GFP_ Rep3_set2_001.nd2	4	Kc IF_Cid Cy2 and GFP Cy3_Cap-H2-MBMdC23-GFP_ Rep2_set1_005.nd2	3
3-27-14_Kc IF_pMT-eGFP_CID Cy2_GFP_Cy5_002.nd2	3	Kc IF_pMT-Cap-H2-eGFP_CID Cy2 GFP Cy3_002.nd2	4	3-27-14_Kc IF_Cap-H2-MBM-eGFP_CID Cy2_GFP_Cy5_003.nd2	3	Kc IF_Cid Cy2 and GFP Cy3_Cap-H2-dC23-GFP_ Rep3_set2_001.nd2	4	Kc IF_Cid Cy2 and GFP Cy3_Cap-H2-MBMdC23-GFP_ Rep2_set1_005.nd2	3
3-27-14_Kc IF_pMT-eGFP_CID Cy2_GFP_Cy5_002.nd2	3	Kc IF_pMT-Cap-H2-eGFP_CID Cy2 GFP Cy3_002.nd2	4	3-27-14_Kc IF_Cap-H2-MBM-eGFP_CID Cy2_GFP_Cy5_004.nd2	3	Kc IF_Cid Cy2 and GFP Cy3_Cap-H2-dC23-GFP_ Rep3_set2_002.nd2	4	Kc IF_Cid Cy2 and GFP Cy3_Cap-H2-MBMdC23-GFP_ Rep2_set2_001.nd2	3
3-27-14_Kc IF_pMT-eGFP_CID Cy2_GFP_Cy5_002.nd2	3	Kc IF_pMT-Cap-H2-eGFP_CID Cy2 GFP Cy3_002.nd2	4	3-27-14_Kc IF_Cap-H2-MBM-eGFP_CID Cy2_GFP_Cy5_004.nd2	3	Kc IF_Cid Cy2 and GFP Cy3_Cap-H2-dC23-GFP_ Rep3_set2_002.nd2	4	Kc IF_Cid Cy2 and GFP Cy3_Cap-H2-MBMdC23-GFP_ Rep2_set2_001.nd2	3
3-27-14_Kc IF_pMT-eGFP_CID Cy2_GFP_Cy5_002.nd2	3	Kc IF_pMT-Cap-H2-eGFP_CID Cy2 GFP Cy3_002.nd2	4	3-27-14_Kc IF_Cap-H2-MBM-eGFP_CID Cy2_GFP_Cy5_004.nd2	3	Kc IF_Cid Cy2 and GFP Cy3_Cap-H2-dC23-GFP_ Rep3_set2_002.nd2	4	Kc IF_Cid Cy2 and GFP Cy3_Cap-H2-MBMdC23-GFP_ Rep2_set2_001.nd2	3
3-27-14_Kc IF_pMT-eGFP_CID Cy2_GFP_Cy5_002.nd2	3	Kc IF_pMT-Cap-H2-eGFP_CID Cy2 GFP Cy3_002.nd2	4	3-27-14_Kc IF_Cap-H2-MBM-eGFP_CID Cy2_GFP_Cy5_004.nd2	3	Kc IF_Cid Cy2 and GFP Cy3_Cap-H2-dC23-GFP_ Rep3_set2_002.nd2	4	Kc IF_Cid Cy2 and GFP Cy3_Cap-H2-MBMdC23-GFP_ Rep2_set2_001.nd2	3
3-27-14_Kc IF_pMT-eGFP_CID Cy2_GFP_Cy5_002.nd2	3	Kc IF_pMT-Cap-H2-eGFP_CID Cy2 GFP Cy3_002.nd2	4	3-27-14_Kc IF_Cap-H2-MBM-eGFP_CID Cy2_GFP_Cy5_005.nd2	3	Kc IF_Cid Cy2 and GFP Cy3_Cap-H2-dC23-GFP_ Rep3_set2_003.nd2	4	Kc IF_Cid Cy2 and GFP Cy3_Cap-H2-MBMdC23-GFP_ Rep2_set2_001.nd2	3
3-27-14_Kc IF_pMT-eGFP_CID Cy2_GFP_Cy5_003.nd2	3	Kc IF_pMT-Cap-H2-eGFP_CID Cy2 GFP Cy3_002.nd2	4	3-27-14_Kc IF_Cap-H2-MBM-eGFP_CID Cy2_GFP_Cy5_005.nd2	3	Kc IF_Cid Cy2 and GFP Cy3_Cap-H2-dC23-GFP_ Rep3_set2_003.nd2	4	Kc IF_Cid Cy2 and GFP Cy3_Cap-H2-MBMdC23-GFP_ Rep2_set2_002.nd2	3
3-27-14_Kc IF_pMT-eGFP_CID Cy2_GFP_Cy5_003.nd2	3	Kc IF_pMT-Cap-H2-eGFP_CID Cy2 GFP Cy3_001.nd2	4	3-27-14_Kc IF_Cap-H2-MBM-eGFP_CID Cy2_GFP_Cy5_005.nd2	3	Kc IF_Cid Cy2 and GFP Cy3_Cap-H2-dC23-GFP_ Rep3_set2_003.nd2	4	Kc IF_Cid Cy2 and GFP Cy3_Cap-H2-MBMdC23-GFP_ Rep2_set2_003.nd2	3
3-27-14_Kc IF_pMT-eGFP_CID Cy2_GFP_Cy5_003.nd2	3	Kc IF_pMT-Cap-H2-eGFP_CID Cy2 GFP Cy3_001.nd2	4	3-27-14_Kc IF_Cap-H2-MBM-eGFP_CID Cy2_GFP_Cy5_005.nd2	3	Kc IF_Cid Cy2 and GFP Cy3_Cap-H2-dC23-GFP_ Rep3_set2_003.nd2	4	Kc IF_Cid Cy2 and GFP Cy3_Cap-H2-MBMdC23-GFP_ Rep2_set2_003.nd2	3
3-27-14_Kc IF_pMT-eGFP_CID Cy2_GFP_Cy5_003.nd2	3	Kc IF_pMT-Cap-H2-eGFP_CID Cy2 GFP Cy3_001.nd2	4	3-27-14_Kc IF_Cap-H2-MBM-eGFP_CID Cy2_GFP_Cy5_005.nd2	3	Kc IF_Cid Cy2 and GFP Cy3_Cap-H2-dC23-GFP_ Rep3_set2_004.nd2	4	Kc IF_Cid Cy2 and GFP Cy3_Cap-H2-MBMdC23-GFP_ Rep2_set2_003.nd2	3
3-27-14_Kc IF_pMT-eGFP_CID Cy2_GFP_Cy5_003.nd2	3	Kc IF_pMT-Cap-H2-eGFP_CID Cy2 GFP Cy3_001.nd2	4	3-27-14_Kc IF_Cap-H2-MBM-eGFP_CID Cy2_GFP_Cy5_006.nd2	3	Kc IF_Cid Cy2 and GFP Cy3_Cap-H2-dC23-GFP_ Rep3_set2_004.nd2	4	Kc IF_Cid Cy2 and GFP Cy3_Cap-H2-MBMdC23-GFP_ Rep2_set2_004.nd2	3
3-27-14_Kc IF_pMT-eGFP_CID Cy2_GFP_Cy5_003.nd2	3	Kc IF_pMT-Cap-H2-eGFP_CID Cy2 GFP Cy3_001.nd2	4	3-27-14_Kc IF_Cap-H2-MBM-eGFP_CID Cy2_GFP_Cy5_006.nd2	3	Kc IF_Cid Cy2 and GFP Cy3_Cap-H2-dC23-GFP_ Rep3_set2_004.nd2	4	Kc IF_Cid Cy2 and GFP Cy3_Cap-H2-MBMdC23-GFP_ Rep2_set2_004.nd2	3
3-27-14_Kc IF_pMT-eGFP_CID Cy2_GFP_Cy5_003.nd2	3	Kc IF_pMT-Cap-H2-eGFP_CID Cy2 GFP Cy3_001.nd2	4	3-27-14_Kc IF_Cap-H2-MBM-eGFP_CID Cy2_GFP_Cy5_006.nd2	3	Kc IF_Cid Cy2 and GFP Cy3_Cap-H2-dC23-GFP_ Rep3_set2_004.nd2	4	Kc IF_Cid Cy2 and GFP Cy3_Cap-H2-MBMdC23-GFP_ Rep2_set2_004.nd2	3
3-25-14_Kc IF_pMT-eGFP_CID Cy2_GFP_Cy5_locali1007.nd2	3	Kc IF_pMT-Cap-H2-eGFP_CID Cy2 GFP Cy3_001.nd2	4	3-27-14_Kc IF_Cap-H2-MBM-eGFP_CID Cy2_GFP_Cy5_006.nd2	3	Kc IF_Cid Cy2 and GFP Cy3_Cap-H2-dC23-GFP_ Rep3_set2_005.nd2	4	Kc IF_Cid Cy2 and GFP Cy3_Cap-H2-MBMdC23-GFP_ Rep2_set2_005.nd2	3
3-25-14_Kc IF_pMT-eGFP_CID Cy2_GFP_Cy5_locali1007.nd2	3	Kc IF_pMT-Cap-H2-eGFP_CID Cy2 GFP Cy3_001.nd2	4	3-27-14_Kc IF_Cap-H2-MBM-eGFP_CID Cy2_GFP_Cy5_006.nd2	3	Kc IF_Cid Cy2 and GFP Cy3_Cap-H2-dC23-GFP_ Rep3_set2_005.nd2	4	Kc IF_Cid Cy2 and GFP Cy3_Cap-H2-MBMdC23-GFP_ Rep2_set2_006.nd2	3
3-25-14_Kc IF_pMT-eGFP_CID Cy2_GFP_Cy5_locali1007.nd2	3	Kc IF_pMT-Cap-H2-eGFP_CID Cy2 GFP Cy3_005.nd2	4	3-27-14_Kc IF_Cap-H2-MBM-eGFP_CID Cy2_GFP_Cy5_006.nd2	3	Kc IF_Cid Cy2 and GFP Cy3_Cap-H2-dC23-GFP_ Rep3_set2_005.nd2	4	Kc IF_Cid Cy2 and GFP Cy3_Cap-H2-MBMdC23-GFP_ Rep2_set2_006.nd2	3
3-25-14_Kc IF_pMT-eGFP_CID Cy2_GFP_Cy5_locali1007.nd2	3	Kc IF_pMT-Cap-H2-eGFP_CID Cy2 GFP Cy3_005.nd2	4	3-27-14_Kc IF_Cap-H2-MBM-eGFP_CID Cy2_GFP_Cy5_006.nd2	3	Kc IF_Cid Cy2 and GFP Cy3_Cap-H2-dC23-GFP_ Rep3_set2_005.nd2	4	Kc IF_Cid Cy2 and GFP Cy3_Cap-H2-MBMdC23-GFP_ Rep2_set2_006.nd2	3
3-25-14_Kc IF_pMT-eGFP_CID Cy2_GFP_Cy5_locali1007.nd2	3	Kc IF_pMT-Cap-H2-eGFP_CID Cy2 GFP Cy3_005.nd2	4	3-27-14_Kc IF_Cap-H2-MBM-eGFP_CID Cy2_GFP_Cy5_007.nd2	3	Kc IF_Cid Cy2 and GFP Cy3_Cap-H2-dC23-GFP_ Rep3_set2_005.nd2	4	Kc IF_Cid Cy2 and GFP Cy3_Cap-H2-MBMdC23-GFP_ Rep2_set2_006.nd2	3
3-25-14_Kc IF_pMT-eGFP_CID Cy2_GFP_Cy5_locali1007.nd2	3	Kc IF_pMT-Cap-H2-eGFP_CID Cy2 GFP Cy3_005.nd2	4	3-27-14_Kc IF_Cap-H2-MBM-eGFP_CID Cy2_GFP_Cy5_007.nd2	3	Kc IF_Cid Cy2 and GFP Cy3_Cap-H2-dC23-GFP_ Rep3_set2_006.nd2	4	Kc IF_Cid Cy2 and GFP Cy3_Cap-H2-MBMdC23-GFP_ Rep2_set2_007.nd2	3
3-25-14_Kc IF_pMT-eGFP_CID Cy2_GFP_Cy5_locali1007.nd2	3	Kc IF_pMT-Cap-H2-eGFP_CID Cy2 GFP Cy3_005.nd2	4	3-27-14_Kc IF_Cap-H2-MBM-eGFP_CID Cy2_GFP_Cy5_007.nd2	3	Kc IF_Cid Cy2 and GFP Cy3_Cap-H2-dC23-GFP_ Rep3_set2_007.nd2	4	Kc IF_Cid Cy2 and GFP Cy3_Cap-H2-MBMdC23-GFP_ Rep2_set2_007.nd2	3
3-27-14_Kc IF_pMT-eGFP_CID Cy2_GFP_Cy5_003.nd2	3	Kc IF_pMT-Cap-H2-eGFP_CID Cy2 GFP Cy3_005.nd2	4	3-27-14_Kc IF_Cap-H2-MBM-eGFP_CID Cy2_GFP_Cy5_007.nd2	3	Kc IF_Cid Cy2 and GFP Cy3_Cap-H2-dC23-GFP_ Rep3_set2_007.nd2	4	Kc IF_Cid Cy2 and GFP Cy3_Cap-H2-MBMdC23-GFP_ Rep2_set2_008.nd2	3
3-27-14_Kc IF_pMT-eGFP_CID Cy2_GFP_Cy5_003.nd2	3	Kc IF_pMT-Cap-H2-eGFP_CID Cy2 GFP Cy3_007.nd2	4	3-27-14_Kc IF_Cap-H2-MBM-eGFP_CID Cy2_GFP_Cy5_008.nd2	3	Kc IF_Cid Cy2 and GFP Cy3_Cap-H2-dC23-GFP_ Rep3_set2_008.nd2	4	Kc IF_Cid Cy2 and GFP Cy3_Cap-H2-MBMdC23-GFP_ Rep2_set2_008.nd2	3
3-27-14_Kc IF_pMT-eGFP_CID Cy2_GFP_Cy5_006.nd2	3	Kc IF_pMT-Cap-H2-eGFP_CID Cy2 GFP Cy3_007.nd2	4	3-27-14_Kc IF_Cap-H2-MBM-eGFP_CID Cy2_GFP_Cy5_008.nd2	3	Kc IF_Cid Cy2 and GFP Cy3_Cap-H2-dC23-GFP_ Rep3_set2_008.nd2	4	3-25-14_Kc IF_Cap-h2-MBM-dC23-eGFP_CID Cy2_GFP_Cy5_001.nd2	4
3-27-14_Kc IF_pMT-eGFP_CID Cy2_GFP_Cy5_002.nd2	3	Kc IF_pMT-Cap-H2-eGFP_CID Cy2 GFP Cy3_007.nd2	4	3-27-14_Kc IF_Cap-H2-MBM-eGFP_CID Cy2_GFP_Cy5_008.nd2	3	Kc IF_Cid Cy2 and GFP Cy3_Cap-H2-dC23-GFP_ Rep3_set2_008.nd2	4	3-25-14_Kc IF_Cap-h2-MBM-dC23-eGFP_CID Cy2_GFP_Cy5_001.nd2	4
Kc IF_pMT-eGFP_CID Cy2 GFP Cy3_003.nd2	4	Kc IF_pMT-Cap-H2-eGFP_CID Cy2 GFP Cy3_007.nd2	4	3-25-14_Kc IF_Cap-h2-MBM-eGFP_CID Cy2_GFP_Cy5_locali1004.nd2	3	Kc IF_Cid Cy2 and GFP Cy3_Cap-H2-dC2-GFP_ Rep3_setting1_001.nd2	4	3-25-14_Kc IF_Cap-h2-MBM-dC23-eGFP_CID Cy2_GFP_Cy5_002.nd2	4
Kc IF_pMT-eGFP_CID Cy2 GFP Cy3_003.nd2	4	Kc IF_pMT-Cap-H2-eGFP_CID Cy2 GFP Cy3_007.nd2	4	3-25-14_Kc IF_Cap-h2-MBM-eGFP_CID Cy2_GFP_Cy5_locali1004.nd2	3	Kc IF_Cid Cy2 and GFP Cy3_Cap-H2-dC2-GFP_ Rep3_setting1_001.nd2	4	3-25-14_Kc IF_Cap-h2-MBM-dC23-eGFP_CID Cy2_GFP_Cy5_002.nd2	4
Kc IF_pMT-eGFP_CID Cy2 GFP Cy3_003.nd2	4	Kc IF_pMT-Cap-H2-eGFP_CID Cy2 GFP Cy3_007.nd2	4	3-25-14_Kc IF_Cap-h2-MBM-eGFP_CID Cy2_GFP_Cy5_locali1004.nd2	3	Kc IF_Cid Cy2 and GFP Cy3_Cap-H2-dC2-GFP_ Rep3_setting1_006.nd2	4	3-25-14_Kc IF_Cap-h2-MBM-dC23-eGFP_CID Cy2_GFP_Cy5_004.nd2	4
Kc IF_pMT-eGFP_CID Cy2 GFP Cy3_003.nd2	4	Kc IF_pMT-Cap-H2-eGFP_CID Cy2 GFP Cy3_006.nd2	4	3-25-14_Kc IF_Cap-h2-MBM-eGFP_CID Cy2_GFP_Cy5_locali1005.nd2	3	Kc IF_Cid Cy2 and GFP Cy3_Cap-H2-dC2-GFP_ Rep3_setting1_006.nd2	4	3-25-14_Kc IF_Cap-h2-MBM-dC23-eGFP_CID Cy2_GFP_Cy5_002.nd2	4
Kc IF_pMT-eGFP_CID Cy2 GFP Cy3_003.nd2	4	Kc IF_pMT-Cap-H2-eGFP_CID Cy2 GFP Cy3_006.nd2	4	3-25-14_Kc IF_Cap-h2-MBM-eGFP_CID Cy2_GFP_Cy5_locali1005.nd2	3	3-25-14_Kc IF_Cap-h2-dC23-eGFP_CID Cy2_GFP_Cy5_locali1002.nd2	4	3-25-14_Kc IF_Cap-h2-MBM-dC23-eGFP_CID Cy2_GFP_Cy5_002.nd2	4
Kc IF_pMT-eGFP_CID Cy2 GFP Cy3_003.nd2	4	Kc IF_pMT-Cap-H2-eGFP_CID Cy2 GFP Cy3_006.nd2	4	3-25-14_Kc IF_Cap-h2-MBM-eGFP_CID Cy2_GFP_Cy5_locali1005.nd2	3	3-25-14_Kc IF_CID Cy2_GFP_Cy5_001.nd2	4	3-25-14_Kc IF_Cap-h2-MBM-dC23-eGFP_CID Cy2_GFP_Cy5_005.nd2	4
Kc IF_pMT-eGFP_CID Cy2 GFP Cy3_003.nd2	4	Kc IF_pMT-Cap-H2-eGFP_CID Cy2 GFP Cy3_006.nd2	4	3-27-14_Kc IF_Cap-H2-MBM-eGFP_CID Cy2_GFP_Cy5_001.nd2	3	3-25-14_Kc IF_CID Cy2_GFP_Cy5_005.nd2	4	3-25-14_Kc IF_Cap-h2-MBM-dC23-eGFP_CID Cy2_GFP_Cy5_006.nd2	4
Kc IF_pMT-eGFP_CID Cy2 GFP Cy3_003.nd2	4	Kc IF_pMT-Cap-H2-eGFP_CID Cy2 GFP Cy3_good locali003.nd2	4	3-27-14_Kc IF_Cap-H2-MBM-eGFP_CID Cy2_GFP_Cy5_001.nd2	3	3-25-14_Kc IF_CID Cy2_GFP_Cy5_007.nd2	4	3-25-14_Kc IF_Cap-h2-MBM-dC23-eGFP_CID Cy2_GFP_Cy5_001.nd2	4
Kc IF_pMT-eGFP_CID Cy2 GFP Cy3_002.nd2	4	Kc IF_pMT-Cap-H2-eGFP_CID Cy2 GFP Cy3_good locali003.nd2	4	3-27-14_Kc IF_Cap-H2-MBM-eGFP_CID Cy2_GFP_Cy5_001.nd2	3	3-25-14_Kc IF_CID Cy2_GFP_Cy5_002.nd2	4	3-25-14_Kc IF_Cap-h2-MBM-dC23-eGFP_CID Cy2_GFP_Cy5_002.nd2	4
Kc IF_pMT-eGFP_CID Cy2 GFP Cy3_002.nd2	4	Kc IF_pMT-Cap-H2-eGFP_CID Cy2 GFP Cy3_good locali003.nd2	4	Kc IF_pMT-Cap-H2-MBM-eGFP_CID Cy2 GFP Cy3_001.nd2	4	3-25-14_Kc IF_CID Cy2_GFP_Cy5_007.nd2	4	3-25-14_Kc IF_Cap-h2-MBM-dC23-eGFP_CID Cy2_GFP_Cy5_005.nd2	4
Kc IF_pMT-eGFP_CID Cy2 GFP Cy3_002.nd2	4	Kc IF_pMT-Cap-H2-eGFP_CID Cy2 GFP Cy3_good locali003.nd2	4	Kc IF_pMT-Cap-H2-MBM-eGFP_CID Cy2 GFP Cy3_001.nd2	4	3-25-14_Kc IF_CID Cy2_GFP_Cy5_002.nd2	4	3-25-14_Kc IF_Cap-h2-MBM-dC23-eGFP_CID Cy2_GFP_Cy5_008.nd2	4
Kc IF_pMT-eGFP_CID Cy2 GFP Cy3_002.nd2	4	Kc IF_pMT-Cap-H2-eGFP_CID Cy2 GFP Cy3_good locali003.nd2	4	Kc IF_pMT-Cap-H2-MBM-eGFP_CID Cy2 GFP Cy3_009.nd2	4	3-25-14_Kc IF_CID Cy2_GFP_Cy5_007.nd2	4	3-25-14_Kc IF_Cap-h2-MBM-dC23-eGFP_CID Cy2_GFP_Cy5_007.nd2	4
Kc IF_pMT-eGFP_CID Cy2 GFP Cy3_002.nd2	4	Kc IF_pMT-Cap-H2-eGFP_CID Cy2 GFP Cy3_008.nd2	4	Kc IF_pMT-Cap-H2-MBM-eGFP_CID Cy2 GFP Cy3_009.nd2	4	3-25-14_Kc IF_Cap-h2-dC23-eGFP_CID Cy2_GFP_Cy5_locali1002.nd2	4	3-25-14_Kc IF_Cap-h2-MBM-dC23-eGFP_CID Cy2_GFP_Cy5_006.nd2	4
Kc IF_pMT-eGFP_CID Cy2 GFP Cy3_002.nd2	4	Kc IF_pMT-Cap-H2-eGFP_CID Cy2 GFP Cy3_008.nd2	4	Kc IF_pMT-Cap-H2-MBM-eGFP_CID Cy2 GFP Cy3_009.nd2	4	3-25-14_Kc IF_CID Cy2_GFP_Cy5_008.nd2	4	3-25-14_Kc IF_Cap-h2-MBM-dC23-eGFP_CID Cy2_GFP_Cy5_006.nd2	4
Kc IF_pMT-eGFP_CID Cy2 GFP Cy3_001.nd2	4	Kc IF_pMT-Cap-H2-eGFP_CID Cy2 GFP Cy3_008.nd2	4	Kc IF_pMT-Cap-H2-MBM-eGFP_CID Cy2 GFP Cy3_009.nd2	4	3-25-14_Kc IF_CID Cy2_GFP_Cy5_005.nd2	4	3-25-14_Kc IF_Cap-h2-MBM-dC23-eGFP_CID Cy2_GFP_Cy5_006.nd2	4
Kc IF_pMT-eGFP_CID Cy2 GFP Cy3_001.nd2	4	Kc IF_pMT-Cap-H2-eGFP_CID Cy2 GFP Cy3_008.nd2	4	Kc IF_pMT-Cap-H2-MBM-eGFP_CID Cy2 GFP Cy3_009.nd2	4	3-25-14_Kc IF_CID Cy2_GFP_Cy5_008.nd2	4	3-25-14_Kc IF_Cap-h2-MBM-dC23-eGFP_CID Cy2_GFP_Cy5_002.nd2	4
Kc IF_pMT-eGFP_CID Cy2 GFP Cy3_001.nd2	4	Kc IF_pMT-Cap-H2-eGFP_CID Cy2 GFP Cy3_008.nd2	4	Kc IF_pMT-Cap-H2-MBM-eGFP_CID Cy2 GFP Cy3_004.nd2	4	3-25-14_Kc IF_CID Cy2_GFP_Cy5_002.nd2	4	3-25-14_Kc IF_Cap-h2-MBM-dC23-eGFP_CID Cy2_GFP_Cy5_003.nd2	4
Kc IF_pMT-eGFP_CID Cy2 GFP Cy3_001.nd2	4	3-27-14_Kc IF_Cap-H2-eGFP_CID Cy2_GFP_Cy5_004.nd2	4	Kc IF_pMT-Cap-H2-MBM-eGFP_CID Cy2 GFP Cy3_004.nd2	4	3-25-14_Kc IF_Cap-h2-dC23-eGFP_CID Cy2_GFP_Cy5_locali1001.nd2	4	3-25-14_Kc IF_Cap-h2-MBM-dC23-eGFP_CID Cy2_GFP_Cy5_007.nd2	4
Kc IF_pMT-eGFP_CID Cy2 GFP Cy3_001.nd2	4	3-27-14_Kc IF_Cap-H2-eGFP_CID Cy2_GFP_Cy5_004.nd2	4	Kc IF_pMT-Cap-H2-MBM-eGFP_CID Cy2 GFP Cy3_004.nd2	4	3-25-14_Kc IF_Cap-h2-dC23-eGFP_CID Cy2_GFP_Cy5_locali1001.nd2	4	3-25-14_Kc IF_Cap-h2-MBM-dC23-eGFP_CID Cy2_GFP_Cy5_004.nd2	4
Kc IF_pMT-eGFP_CID Cy2 GFP Cy3_001.nd2	4	3-27-14_Kc IF_Cap-H2-eGFP_CID Cy2_GFP_Cy5_004.nd2	4	Kc IF_pMT-Cap-H2-MBM-eGFP_CID Cy2 GFP Cy3_004.nd2	4	3-25-14_Kc IF_CID Cy2_GFP_Cy5_007.nd2	4	3-25-14_Kc IF_Cap-h2-MBM-dC23-eGFP_CID Cy2_GFP_Cy5_005.nd2	4
Kc IF_pMT-eGFP_CID Cy2 GFP Cy3_001.nd2	4	3-27-14_Kc IF_Cap-H2-eGFP_CID Cy2_GFP_Cy5_004.nd2	4	Kc IF_pMT-Cap-H2-MBM-eGFP_CID Cy2 GFP Cy3_004.nd2	4	Kc IF_pMT-Cap-H2-dC23-eGFP_CID Cy2 GFP Cy3_001.nd2	4	3-25-14_Kc IF_Cap-h2-MBM-dC23-eGFP_CID Cy2_GFP_Cy5_003.nd2	4
Kc IF_pMT-eGFP_CID Cy2 GFP Cy3_good locali004.nd2	4	3-27-14_Kc IF_Cap-H2-eGFP_CID Cy2_GFP_Cy5_005.nd2	4	Kc IF_pMT-Cap-H2-MBM-eGFP_CID Cy2 GFP Cy3_004.nd2	4	Kc IF_pMT-Cap-H2-dC23-eGFP_CID Cy2 GFP Cy3_003.nd2	4	3-25-14_Kc IF_Cap-h2-MBM-dC23-eGFP_CID Cy2_GFP_Cy5_001.nd2	4
Kc IF_pMT-eGFP_CID Cy2 GFP Cy3_good locali004.nd2	4	3-27-14_Kc IF_Cap-H2-eGFP_CID Cy2_GFP_Cy5_005.nd2	4	Kc IF_pMT-Cap-H2-MBM-eGFP_CID Cy2 GFP Cy3_004.nd2	4	Kc IF_pMT-Cap-H2-dC23-eGFP_CID Cy2 GFP Cy3_007.nd2	4	3-25-14_Kc IF_Cap-h2-MBM-dC23-eGFP_CID Cy2_GFP_Cy5_004.nd2	4
Kc IF_pMT-eGFP_CID Cy2 GFP Cy3_good locali004.nd2	4	3-27-14_Kc IF_Cap-H2-eGFP_CID Cy2_GFP_Cy5_005.nd2	4	Kc IF_pMT-Cap-H2-MBM-eGFP_CID Cy2 GFP Cy3_004.nd2	4	Kc IF_pMT-Cap-H2-dC23-eGFP_CID Cy2 GFP Cy3_good locali001.nd2	4	3-25-14_Kc IF_Cap-h2-MBM-dC23-eGFP_CID Cy2_GFP_Cy5_004.nd2	4
Kc IF_pMT-eGFP_CID Cy2 GFP Cy3_008.nd2	4	3-27-14_Kc IF_Cap-H2-eGFP_CID Cy2_GFP_Cy5_006.nd2	4	Kc IF_pMT-Cap-H2-MBM-eGFP_CID Cy2 GFP Cy3_008.nd2	4	Kc IF_pMT-Cap-H2-dC23-eGFP_CID Cy2 GFP Cy3_002.nd2	4	3-25-14_Kc IF_Cap-h2-MBM-dC23-eGFP_CID Cy2_GFP_Cy5_007.nd2	4
Kc IF_pMT-eGFP_CID Cy2 GFP Cy3_008.nd2	4	3-27-14_Kc IF_Cap-H2-eGFP_CID Cy2_GFP_Cy5_006.nd2	4	Kc IF_pMT-Cap-H2-MBM-eGFP_CID Cy2 GFP Cy3_008.nd2	4	Kc IF_pMT-Cap-H2-dC23-eGFP_CID Cy2 GFP Cy3_good locali001.nd2	4	3-25-14_Kc IF_Cap-h2-MBM-dC23-eGFP_CID Cy2_GFP_Cy5_008.nd2	4
Kc IF_pMT-eGFP_CID Cy2 GFP Cy3_008.nd2	4	3-27-14_Kc IF_Cap-H2-eGFP_CID Cy2_GFP_Cy5_006.nd2	4	Kc IF_pMT-Cap-H2-MBM-eGFP_CID Cy2 GFP Cy3_008.nd2	4	Kc IF_pMT-Cap-H2-dC23-eGFP_CID Cy2 GFP Cy3_003.nd2	4	3-25-14_Kc IF_Cap-h2-MBM-dC23-eGFP_CID Cy2_GFP_Cy5_007.nd2	4
Kc IF_pMT-eGFP_CID Cy2 GFP Cy3_007.nd2	4	3-27-14_Kc IF_Cap-H2-eGFP_CID Cy2_GFP_Cy5_006.nd2	4	Kc IF_pMT-Cap-H2-MBM-eGFP_CID Cy2 GFP Cy3_008.nd2	4	Kc IF_pMT-Cap-H2-dC23-eGFP_CID Cy2 GFP Cy3_003.nd2	4	Kc IF_Cid Cy2 and GFP Cy3_Cap-H2-MBMdC23-GFP_ Rep3_set1_002.nd2	4
Kc IF_pMT-eGFP_CID Cy2 GFP Cy3_007.nd2	4	3-27-14_Kc IF_Cap-H2-eGFP_CID Cy2_GFP_Cy5_006.nd2	4	Kc IF_pMT-Cap-H2-MBM-eGFP_CID Cy2 GFP Cy3_008.nd2	4	Kc IF_pMT-Cap-H2-dC23-eGFP_CID Cy2 GFP Cy3_008.nd2	4	Kc IF_Cid Cy2 and GFP Cy3_Cap-H2-MBMdC23-GFP_ Rep3_set1_001.nd2	4
Kc IF_pMT-eGFP_CID Cy2 GFP Cy3_007.nd2	4	3-27-14_Kc IF_Cap-H2-eGFP_CID Cy2_GFP_Cy5_006.nd2	4	Kc IF_pMT-Cap-H2-MBM-eGFP_CID Cy2 GFP Cy3_008.nd2	4	Kc IF_pMT-Cap-H2-dC23-eGFP_CID Cy2 GFP Cy3_001.nd2	4	Kc IF_Cid Cy2 and GFP Cy3_Cap-H2-MBMdC23-GFP_ Rep3_set1_001.nd2	4
Kc IF_pMT-eGFP_CID Cy2 GFP Cy3_007.nd2	4	3-27-14_Kc IF_Cap-H2-eGFP_CID Cy2_GFP_Cy5_006.nd2	4	Kc IF_pMT-Cap-H2-MBM-eGFP_CID Cy2 GFP Cy3_008.nd2	4	Kc IF_pMT-Cap-H2-dC23-eGFP_CID Cy2 GFP Cy3_005.nd2	4	Kc IF_Cid Cy2 and GFP Cy3_Cap-H2-MBMdC23-GFP_ Rep3_set1_001.nd2	4
Kc IF_pMT-eGFP_CID Cy2 GFP Cy3_007.nd2	4	3-27-14_Kc IF_Cap-H2-eGFP_CID Cy2_GFP_Cy5_007.nd2	4	Kc IF_pMT-Cap-H2-MBM-eGFP_CID Cy2 GFP Cy3_005.nd2	4	Kc IF_pMT-Cap-H2-dC23-eGFP_CID Cy2 GFP Cy3_002.nd2	4	Kc IF_Cid Cy2 and GFP Cy3_Cap-H2-MBMdC23-GFP_ Rep3_set1_001.nd2	4
Kc IF_pMT-eGFP_CID Cy2 GFP Cy3_007.nd2	4	3-27-14_Kc IF_Cap-H2-eGFP_CID Cy2_GFP_Cy5_007.nd2	4	Kc IF_pMT-Cap-H2-MBM-eGFP_CID Cy2 GFP Cy3_005.nd2	4	Kc IF_pMT-Cap-H2-dC23-eGFP_CID Cy2 GFP Cy3_002.nd2	4	Kc IF_Cid Cy2 and GFP Cy3_Cap-H2-MBMdC23-GFP_ Rep3_set1_001.nd2	4
Kc IF_pMT-eGFP_CID Cy2 GFP Cy3_007.nd2	4	3-27-14_Kc IF_Cap-H2-eGFP_CID Cy2_GFP_Cy5_007.nd2	4	Kc IF_pMT-Cap-H2-MBM-eGFP_CID Cy2 GFP Cy3_005.nd2	4	Kc IF_pMT-Cap-H2-dC23-eGFP_CID Cy2 GFP Cy3_good locali001.nd2	4	Kc IF_Cid Cy2 and GFP Cy3_Cap-H2-MBMdC23-GFP_ Rep3_set1_002.nd2	4
Kc IF_pMT-eGFP_CID Cy2 GFP Cy3_006.nd2	4	3-27-14_Kc IF_Cap-H2-eGFP_CID Cy2_GFP_Cy5_007.nd2	4	Kc IF_pMT-Cap-H2-MBM-eGFP_CID Cy2 GFP Cy3_005.nd2	4	Kc IF_pMT-Cap-H2-dC23-eGFP_CID Cy2 GFP Cy3_007.nd2	4	Kc IF_Cid Cy2 and GFP Cy3_Cap-H2-MBMdC23-GFP_ Rep3_set1_002.nd2	4
Kc IF_pMT-eGFP_CID Cy2 GFP Cy3_006.nd2	4	3-27-14_Kc IF_Cap-H2-eGFP_CID Cy2_GFP_Cy5_007.nd2	4	Kc IF_pMT-Cap-H2-MBM-eGFP_CID Cy2 GFP Cy3_005.nd2	4	Kc IF_pMT-Cap-H2-dC23-eGFP_CID Cy2 GFP Cy3_008.nd2	4	Kc IF_Cid Cy2 and GFP Cy3_Cap-H2-MBMdC23-GFP_ Rep3_set1_003.nd2	4
Kc IF_pMT-eGFP_CID Cy2 GFP Cy3_006.nd2	4	3-27-14_Kc IF_Cap-H2-eGFP_CID Cy2_GFP_Cy5_007.nd2	4	Kc IF_pMT-Cap-H2-MBM-eGFP_CID Cy2 GFP Cy3_005.nd2	4	Kc IF_pMT-Cap-H2-dC23-eGFP_CID Cy2 GFP Cy3_good locali001.nd2	4	Kc IF_Cid Cy2 and GFP Cy3_Cap-H2-MBMdC23-GFP_ Rep3_set1_003.nd2	4
Kc IF_pMT-eGFP_CID Cy2 GFP Cy3_006.nd2	4	3-27-14_Kc IF_Cap-H2-eGFP_CID Cy2_GFP_Cy5_007.nd2	4	Kc IF_pMT-Cap-H2-MBM-eGFP_CID Cy2 GFP Cy3_005.nd2	4	Kc IF_pMT-Cap-H2-dC23-eGFP_CID Cy2 GFP Cy3_002.nd2	4	Kc IF_Cid Cy2 and GFP Cy3_Cap-H2-MBMdC23-GFP_ Rep3_set1_003.nd2	4
Kc IF_pMT-eGFP_CID Cy2 GFP Cy3_006.nd2	4	3-27-14_Kc IF_Cap-H2-eGFP_CID Cy2_GFP_Cy5_007.nd2	4	Kc IF_pMT-Cap-H2-MBM-eGFP_CID Cy2 GFP Cy3_007.nd2	4	Kc IF_pMT-Cap-H2-dC23-eGFP_CID Cy2 GFP Cy3_good locali002.nd2	4	Kc IF_Cid Cy2 and GFP Cy3_Cap-H2-MBMdC23-GFP_ Rep3_set1_003.nd2	4
Kc IF_pMT-eGFP_CID Cy2 GFP Cy3_006.nd2	4	3-27-14_Kc IF_Cap-H2-eGFP_CID Cy2_GFP_Cy5_007.nd2	4	Kc IF_pMT-Cap-H2-MBM-eGFP_CID Cy2 GFP Cy3_007.nd2	4	Kc IF_pMT-Cap-H2-dC23-eGFP_CID Cy2 GFP Cy3_005.nd2	4	Kc IF_Cid Cy2 and GFP Cy3_Cap-H2-MBMdC23-GFP_ Rep3_set1_004.nd2	4
Kc IF_pMT-eGFP_CID Cy2 GFP Cy3_006.nd2	4	3-27-14_Kc IF_Cap-H2-eGFP_CID Cy2_GFP_Cy5_008.nd2	4	Kc IF_pMT-Cap-H2-MBM-eGFP_CID Cy2 GFP Cy3_007.nd2	4	Kc IF_pMT-Cap-H2-dC23-eGFP_CID Cy2 GFP Cy3_002.nd2	4	Kc IF_Cid Cy2 and GFP Cy3_Cap-H2-MBMdC23-GFP_ Rep3_set2_001.nd2	4
Kc IF_pMT-eGFP_CID Cy2 GFP Cy3_006.nd2	4	3-27-14_Kc IF_Cap-H2-eGFP_CID Cy2_GFP_Cy5_008.nd2	4	Kc IF_pMT-Cap-H2-MBM-eGFP_CID Cy2 GFP Cy3_007.nd2	4	Kc IF_pMT-Cap-H2-dC23-eGFP_CID Cy2 GFP Cy3_008.nd2	4	Kc IF_Cid Cy2 and GFP Cy3_Cap-H2-MBMdC23-GFP_ Rep3_set2_001.nd2	4
Kc IF_pMT-eGFP_CID Cy2 GFP Cy3_006.nd2	4	3-27-14_Kc IF_Cap-H2-eGFP_CID Cy2_GFP_Cy5_008.nd2	4	Kc IF_pMT-Cap-H2-MBM-eGFP_CID Cy2 GFP Cy3_007.nd2	4	Kc IF_pMT-Cap-H2-dC23-eGFP_CID Cy2 GFP Cy3_005.nd2	4	Kc IF_Cid Cy2 and GFP Cy3_Cap-H2-MBMdC23-GFP_ Rep3_set2_001.nd2	4
Kc IF_pMT-eGFP_CID Cy2 GFP Cy3_005.nd2	4	3-27-14_Kc IF_Cap-H2-eGFP_CID Cy2_GFP_Cy5_008.nd2	4	Kc IF_pMT-Cap-H2-MBM-eGFP_CID Cy2 GFP Cy3_007.nd2	4	Kc IF_pMT-Cap-H2-dC23-eGFP_CID Cy2 GFP Cy3_007.nd2	4	Kc IF_Cid Cy2 and GFP Cy3_Cap-H2-MBMdC23-GFP_ Rep3_set2_001.nd2	4
Kc IF_pMT-eGFP_CID Cy2 GFP Cy3_005.nd2	4	3-27-14_Kc IF_Cap-H2-eGFP_CID Cy2_GFP_Cy5_locali1007.nd2	4	Kc IF_pMT-Cap-H2-MBM-eGFP_CID Cy2 GFP Cy3_007.nd2	4	Kc IF_pMT-Cap-H2-dC23-eGFP_CID Cy2 GFP Cy3_002.nd2	4	Kc IF_Cid Cy2 and GFP Cy3_Cap-H2-MBMdC23-GFP_ Rep3_set2_001.nd2	4
Kc IF_pMT-eGFP_CID Cy2 GFP Cy3_005.nd2	4	3-27-14_Kc IF_Cap-H2-eGFP_CID Cy2_GFP_Cy5_locali1007.nd2	4	Kc IF_pMT-Cap-H2-MBM-eGFP_CID Cy2 GFP Cy3_007.nd2	4	Kc IF_pMT-Cap-H2-dC23-eGFP_CID Cy2 GFP Cy3_003.nd2	4	Kc IF_Cid Cy2 and GFP Cy3_Cap-H2-MBMdC23-GFP_ Rep3_set2_002.nd2	4
Kc IF_pMT-eGFP_CID Cy2 GFP Cy3_005.nd2	4	3-27-14_Kc IF_Cap-H2-eGFP_CID Cy2_GFP_Cy5_locali1007.nd2	4	Kc IF_pMT-Cap-H2-MBM-eGFP_CID Cy2 GFP Cy3_002.nd2	4	Kc IF_pMT-Cap-H2-dC23-eGFP_CID Cy2 GFP Cy3_007.nd2	4	Kc IF_Cid Cy2 and GFP Cy3_Cap-H2-MBMdC23-GFP_ Rep3_set2_002.nd2	4
Kc IF_pMT-eGFP_CID Cy2 GFP Cy3_005.nd2	4	3-27-14_Kc IF_Cap-H2-eGFP_CID Cy2_GFP_Cy5_locali1007.nd2	4	Kc IF_pMT-Cap-H2-MBM-eGFP_CID Cy2 GFP Cy3_002.nd2	4	Kc IF_pMT-Cap-H2-dC23-eGFP_CID Cy2 GFP Cy3_004.nd2	4	Kc IF_Cid Cy2 and GFP Cy3_Cap-H2-MBMdC23-GFP_ Rep3_set2_002.nd2	4
Kc IF_pMT-eGFP_CID Cy2 GFP Cy3_005.nd2	4	3-25-14_Kc IF_Cap-h2-eGFP_CID Cy2_GFP_Cy5_locali1006.nd2	4	Kc IF_pMT-Cap-H2-MBM-eGFP_CID Cy2 GFP Cy3_002.nd2	4	Kc IF_pMT-Cap-H2-dC23-eGFP_CID Cy2 GFP Cy3_001.nd2	4	Kc IF_Cid Cy2 and GFP Cy3_Cap-H2-MBMdC23-GFP_ Rep3_set2_002.nd2	4
Kc IF_pMT-eGFP_CID Cy2 GFP Cy3_005.nd2	4	3-25-14_Kc IF_Cap-h2-eGFP_CID Cy2_GFP_Cy5_locali1006.nd2	4	Kc IF_pMT-Cap-H2-MBM-eGFP_CID Cy2 GFP Cy3_003.nd2	4	Kc IF_pMT-Cap-H2-dC23-eGFP_CID Cy2 GFP Cy3_good locali001.nd2	4	Kc IF_Cid Cy2 and GFP Cy3_Cap-H2-MBMdC23-GFP_ Rep3_set2_002.nd2	4
Kc IF_pMT-eGFP_CID Cy2 GFP Cy3_005.nd2	4	3-25-14_Kc IF_Cap-h2-eGFP_CID Cy2_GFP_Cy5_locali1006.nd2	4	Kc IF_pMT-Cap-H2-MBM-eGFP_CID Cy2 GFP Cy3_003.nd2	4	Kc IF_pMT-Cap-H2-dC23-eGFP_CID Cy2 GFP Cy3_008.nd2	4	Kc IF_Cid Cy2 and GFP Cy3_Cap-H2-MBMdC23-GFP_ Rep3_set2_002.nd2	4
Kc IF_pMT-eGFP_CID Cy2 GFP Cy3_005.nd2	4	3-25-14_Kc IF_Cap-h2-eGFP_CID Cy2_GFP_Cy5_locali1006.nd2	4	Kc IF_pMT-Cap-H2-MBM-eGFP_CID Cy2 GFP Cy3_good locali.nd2	4	Kc IF_Cid Cy2 and GFP Cy3_Cap-H2-dC2-GFP_ Rep3_setting1_006.nd2	5	Kc IF_Cid Cy2 and GFP Cy3_Cap-H2-MBMdC23-GFP_ Rep3_set2_002.nd2	4
Kc IF_pMT-eGFP_CID Cy2 GFP Cy3_005.nd2	4	3-27-14_Kc IF_Cap-H2-eGFP_CID Cy2_GFP_Cy5_002.nd2	4	Kc IF_pMT-Cap-H2-MBM-eGFP_CID Cy2 GFP Cy3_good locali.nd2	4	Kc IF_Cid Cy2 and GFP Cy3_Cap-H2-dC2-GFP_ Rep3_setting1_006.nd2	5	Kc IF_Cid Cy2 and GFP Cy3_Cap-H2-MBMdC23-GFP_ Rep3_set2_003.nd2	4
Kc IF_pMT-eGFP_CID Cy2 GFP Cy3_005.nd2	4	3-27-14_Kc IF_Cap-H2-eGFP_CID Cy2_GFP_Cy5_003.nd2	4	Kc IF_pMT-Cap-H2-MBM-eGFP_CID Cy2 GFP Cy3_good locali.nd2	4	Kc IF_Cid Cy2 and GFP Cy3_Cap-H2-dC2-GFP_ Rep3_setting1_006.nd2	5	Kc IF_Cid Cy2 and GFP Cy3_Cap-H2-MBMdC23-GFP_ Rep3_set2_003.nd2	4
Kc IF_pMT-eGFP_CID Cy2 GFP Cy3_005.nd2	4	3-27-14_Kc IF_Cap-H2-eGFP_CID Cy2_GFP_Cy5_003.nd2	4	Kc IF_pMT-Cap-H2-MBM-eGFP_CID Cy2 GFP Cy3_good locali.nd2	4	Kc IF_Cid Cy2 and GFP Cy3_Cap-H2-dC2-GFP_ Rep3_setting1_006.nd2	5	Kc IF_Cid Cy2 and GFP Cy3_Cap-H2-MBMdC23-GFP_ Rep3_set2_003.nd2	4
Kc IF_pMT-eGFP_CID Cy2 GFP Cy3_004.nd2	4	3-27-14_Kc IF_Cap-H2-eGFP_CID Cy2_GFP_Cy5_003.nd2	4	Kc IF_pMT-Cap-H2-MBM-eGFP_CID Cy2 GFP Cy3_good locali.nd2	4	Kc IF_Cid Cy2 and GFP Cy3_Cap-H2-dC2-GFP_ Rep3_setting1_008.nd2	5	Kc IF_Cid Cy2 and GFP Cy3_Cap-H2-MBMdC23-GFP_ Rep3_set2_003.nd2	4
Kc IF_pMT-eGFP_CID Cy2 GFP Cy3_004.nd2	4	3-27-14_Kc IF_Cap-H2-eGFP_CID Cy2_GFP_Cy5_003.nd2	4	Kc IF_pMT-Cap-H2-MBM-eGFP_CID Cy2 GFP Cy3_good locali.nd2	4	Kc IF_Cid Cy2 and GFP Cy3_Cap-H2-dC2-GFP_ Rep3_setting1_008.nd2	5	Kc IF_Cid Cy2 and GFP Cy3_Cap-H2-MBMdC23-GFP_ Rep3_set2_003.nd2	4
Kc IF_pMT-eGFP_CID Cy2 GFP Cy3_004.nd2	4	3-27-14_Kc IF_Cap-H2-eGFP_CID Cy2_GFP_Cy5_003.nd2	4	Kc IF_pMT-Cap-H2-MBM-eGFP_CID Cy2 GFP Cy3_good locali.nd2	4	Kc IF_Cid Cy2 and GFP Cy3_Cap-H2-dC2-GFP_ Rep3_setting1_008.nd2	5	Kc IF_Cid Cy2 and GFP Cy3_Cap-H2-MBMdC23-GFP_ Rep3_set2_003.nd2	4
3-27-14_Kc IF_pMT-eGFP_CID Cy2_GFP_Cy5_004.nd2	4	3-27-14_Kc IF_Cap-H2-eGFP_CID Cy2_GFP_Cy5_003.nd2	4	Kc IF_pMT-Cap-H2-MBM-eGFP_CID Cy2 GFP Cy3_good locali.nd2	4	Kc IF_Cid Cy2 and GFP Cy3_Cap-H2-dC2-GFP_ Rep3_setting1_008.nd2	5	Kc IF_Cid Cy2 and GFP Cy3_Cap-H2-MBMdC23-GFP_ Rep3_set2_003.nd2	4
3-27-14_Kc IF_pMT-eGFP_CID Cy2_GFP_Cy5_005.nd2	4	Kc IF_pMT-Cap-H2-eGFP_CID Cy2 GFP Cy3_004.nd2	5	3-27-14_Kc IF_Cap-H2-MBM-eGFP_CID Cy2_GFP_Cy5_002.nd2	4	Kc IF_Cid Cy2 and GFP Cy3_Cap-H2-dC23-GFP_ Rep3_set2_001.nd2	5	Kc IF_Cid Cy2 and GFP Cy3_Cap-H2-MBMdC23-GFP_ Rep3_set2_004.nd2	4
3-27-14_Kc IF_pMT-eGFP_CID Cy2_GFP_Cy5_005.nd2	4	Kc IF_pMT-Cap-H2-eGFP_CID Cy2 GFP Cy3_004.nd2	5	3-27-14_Kc IF_Cap-H2-MBM-eGFP_CID Cy2_GFP_Cy5_002.nd2	4	Kc IF_Cid Cy2 and GFP Cy3_Cap-H2-dC23-GFP_ Rep3_set2_002.nd2	5	Kc IF_Cid Cy2 and GFP Cy3_Cap-H2-MBMdC23-GFP_ Rep3_set2_004.nd2	4
3-27-14_Kc IF_pMT-eGFP_CID Cy2_GFP_Cy5_005.nd2	4	Kc IF_pMT-Cap-H2-eGFP_CID Cy2 GFP Cy3_004.nd2	5	3-27-14_Kc IF_Cap-H2-MBM-eGFP_CID Cy2_GFP_Cy5_002.nd2	4	Kc IF_Cid Cy2 and GFP Cy3_Cap-H2-dC23-GFP_ Rep3_set2_002.nd2	5	Kc IF_Cid Cy2 and GFP Cy3_Cap-H2-MBMdC23-GFP_ Rep3_set2_004.nd2	4
3-27-14_Kc IF_pMT-eGFP_CID Cy2_GFP_Cy5_005.nd2	4	Kc IF_pMT-Cap-H2-eGFP_CID Cy2 GFP Cy3_003.nd2	5	3-27-14_Kc IF_Cap-H2-MBM-eGFP_CID Cy2_GFP_Cy5_003.nd2	4	Kc IF_Cid Cy2 and GFP Cy3_Cap-H2-dC23-GFP_ Rep3_set2_002.nd2	5	Kc IF_Cid Cy2 and GFP Cy3_Cap-H2-MBMdC23-GFP_ Rep3_set2_004.nd2	4
3-27-14_Kc IF_pMT-eGFP_CID Cy2_GFP_Cy5_005.nd2	4	Kc IF_pMT-Cap-H2-eGFP_CID Cy2 GFP Cy3_003.nd2	5	3-27-14_Kc IF_Cap-H2-MBM-eGFP_CID Cy2_GFP_Cy5_003.nd2	4	Kc IF_Cid Cy2 and GFP Cy3_Cap-H2-dC23-GFP_ Rep3_set2_002.nd2	5	Kc IF_Cid Cy2 and GFP Cy3_Cap-H2-MBMdC23-GFP_ Rep3_set2_004.nd2	4
3-27-14_Kc IF_pMT-eGFP_CID Cy2_GFP_Cy5_006.nd2	4	Kc IF_pMT-Cap-H2-eGFP_CID Cy2 GFP Cy3_003.nd2	5	3-27-14_Kc IF_Cap-H2-MBM-eGFP_CID Cy2_GFP_Cy5_003.nd2	4	Kc IF_Cid Cy2 and GFP Cy3_Cap-H2-dC23-GFP_ Rep3_set2_004.nd2	5	Kc IF_Cid Cy2 and GFP Cy3_Cap-H2-MBMdC23-GFP_ Rep3_set2_005.nd2	4
3-27-14_Kc IF_pMT-eGFP_CID Cy2_GFP_Cy5_006.nd2	4	Kc IF_pMT-Cap-H2-eGFP_CID Cy2 GFP Cy3_003.nd2	5	3-27-14_Kc IF_Cap-H2-MBM-eGFP_CID Cy2_GFP_Cy5_003.nd2	4	Kc IF_Cid Cy2 and GFP Cy3_Cap-H2-dC23-GFP_ Rep3_set2_004.nd2	5	Kc IF_Cid Cy2 and GFP Cy3_Cap-H2-MBMdC23-GFP_ Rep3_set2_005.nd2	4
3-27-14_Kc IF_pMT-eGFP_CID Cy2_GFP_Cy5_006.nd2	4	Kc IF_pMT-Cap-H2-eGFP_CID Cy2 GFP Cy3_003.nd2	5	3-27-14_Kc IF_Cap-H2-MBM-eGFP_CID Cy2_GFP_Cy5_003.nd2	4	Kc IF_Cid Cy2 and GFP Cy3_Cap-H2-dC23-GFP_ Rep3_set2_004.nd2	5	Kc IF_Cid Cy2 and GFP Cy3_Cap-H2-MBMdC23-GFP_ Rep3_set2_005.nd2	4
3-27-14_Kc IF_pMT-eGFP_CID Cy2_GFP_Cy5_006.nd2	4	Kc IF_pMT-Cap-H2-eGFP_CID Cy2 GFP Cy3_003.nd2	5	3-27-14_Kc IF_Cap-H2-MBM-eGFP_CID Cy2_GFP_Cy5_004.nd2	4	Kc IF_Cid Cy2 and GFP Cy3_Cap-H2-dC23-GFP_ Rep3_set2_006.nd2	5	Kc IF_Cid Cy2 and GFP Cy3_Cap-H2-MBMdC23-GFP_ Rep3_set2_005.nd2	4
3-27-14_Kc IF_pMT-eGFP_CID Cy2_GFP_Cy5_006.nd2	4	Kc IF_pMT-Cap-H2-eGFP_CID Cy2 GFP Cy3_003.nd2	5	3-27-14_Kc IF_Cap-H2-MBM-eGFP_CID Cy2_GFP_Cy5_004.nd2	4	Kc IF_Cid Cy2 and GFP Cy3_Cap-H2-dC23-GFP_ Rep3_set2_007.nd2	5	Kc IF_Cid Cy2 and GFP Cy3_Cap-H2-MBMdC23-GFP_ Rep3_set2_006.nd2	4
3-27-14_Kc IF_pMT-eGFP_CID Cy2_GFP_Cy5_006.nd2	4	Kc IF_pMT-Cap-H2-eGFP_CID Cy2 GFP Cy3_003.nd2	5	3-27-14_Kc IF_Cap-H2-MBM-eGFP_CID Cy2_GFP_Cy5_004.nd2	4	Kc IF_Cid Cy2 and GFP Cy3_Cap-H2-dC23-GFP_ Rep3_set2_007.nd2	5	Kc IF_Cid Cy2 and GFP Cy3_Cap-H2-MBMdC23-GFP_ Rep3_set2_006.nd2	4
3-27-14_Kc IF_pMT-eGFP_CID Cy2_GFP_Cy5_006.nd2	4	Kc IF_pMT-Cap-H2-eGFP_CID Cy2 GFP Cy3_002.nd2	5	3-27-14_Kc IF_Cap-H2-MBM-eGFP_CID Cy2_GFP_Cy5_004.nd2	4	Kc IF_Cid Cy2 and GFP Cy3_Cap-H2-dC23-GFP_ Rep3_set2_008.nd2	5	Kc IF_Cid Cy2 and GFP Cy3_Cap-H2-MBMdC23-GFP_ Rep3_set2_006.nd2	4
3-27-14_Kc IF_pMT-eGFP_CID Cy2_GFP_Cy5_007.nd2	4	Kc IF_pMT-Cap-H2-eGFP_CID Cy2 GFP Cy3_002.nd2	5	3-27-14_Kc IF_Cap-H2-MBM-eGFP_CID Cy2_GFP_Cy5_005.nd2	4	Kc IF_Cid Cy2 and GFP Cy3_Cap-H2-dC23-GFP_ Rep3_set2_008.nd2	5	Kc IF_Cid Cy2 and GFP Cy3_Cap-H2-MBMdC23-GFP_ Rep2_set1_001.nd2	4
3-27-14_Kc IF_pMT-eGFP_CID Cy2_GFP_Cy5_007.nd2	4	Kc IF_pMT-Cap-H2-eGFP_CID Cy2 GFP Cy3_002.nd2	5	3-27-14_Kc IF_Cap-H2-MBM-eGFP_CID Cy2_GFP_Cy5_005.nd2	4	Kc IF_Cid Cy2 and GFP Cy3_Cap-H2-dC2-GFP_ Rep3_setting1_001.nd2	5	Kc IF_Cid Cy2 and GFP Cy3_Cap-H2-MBMdC23-GFP_ Rep2_set1_001.nd2	4
3-27-14_Kc IF_pMT-eGFP_CID Cy2_GFP_Cy5_007.nd2	4	Kc IF_pMT-Cap-H2-eGFP_CID Cy2 GFP Cy3_002.nd2	5	3-27-14_Kc IF_Cap-H2-MBM-eGFP_CID Cy2_GFP_Cy5_005.nd2	4	Kc IF_Cid Cy2 and GFP Cy3_Cap-H2-dC2-GFP_ Rep3_setting1_006.nd2	5	Kc IF_Cid Cy2 and GFP Cy3_Cap-H2-MBMdC23-GFP_ Rep2_set1_001.nd2	4
3-27-14_Kc IF_pMT-eGFP_CID Cy2_GFP_Cy5_008.nd2	4	Kc IF_pMT-Cap-H2-eGFP_CID Cy2 GFP Cy3_002.nd2	5	3-27-14_Kc IF_Cap-H2-MBM-eGFP_CID Cy2_GFP_Cy5_006.nd2	4	Kc IF_Cid Cy2 and GFP Cy3_Cap-H2-dC2-GFP_ Rep3_setting1_006.nd2	5	Kc IF_Cid Cy2 and GFP Cy3_Cap-H2-MBMdC23-GFP_ Rep2_set1_002.nd2	4
3-27-14_Kc IF_pMT-eGFP_CID Cy2_GFP_Cy5_008.nd2	4	Kc IF_pMT-Cap-H2-eGFP_CID Cy2 GFP Cy3_002.nd2	5	3-27-14_Kc IF_Cap-H2-MBM-eGFP_CID Cy2_GFP_Cy5_006.nd2	4	Kc IF_Cid Cy2 and GFP Cy3_Cap-H2-dC2-GFP_ Rep3_setting1_006.nd2	5	Kc IF_Cid Cy2 and GFP Cy3_Cap-H2-MBMdC23-GFP_ Rep2_set1_002.nd2	4
3-27-14_Kc IF_pMT-eGFP_CID Cy2_GFP_Cy5_008.nd2	4	Kc IF_pMT-Cap-H2-eGFP_CID Cy2 GFP Cy3_002.nd2	5	3-27-14_Kc IF_Cap-H2-MBM-eGFP_CID Cy2_GFP_Cy5_006.nd2	4	3-25-14_Kc IF_Cap-h2-dC23-eGFP_CID Cy2_GFP_Cy5_locali1002.nd2	5	Kc IF_Cid Cy2 and GFP Cy3_Cap-H2-MBMdC23-GFP_ Rep2_set1_002.nd2	4
3-27-14_Kc IF_pMT-eGFP_CID Cy2_GFP_Cy5_008.nd2	4	Kc IF_pMT-Cap-H2-eGFP_CID Cy2 GFP Cy3_001.nd2	5	3-27-14_Kc IF_Cap-H2-MBM-eGFP_CID Cy2_GFP_Cy5_006.nd2	4	3-25-14_Kc IF_CID Cy2_GFP_Cy5_003.nd2	5	Kc IF_Cid Cy2 and GFP Cy3_Cap-H2-MBMdC23-GFP_ Rep2_set1_003.nd2	4
3-27-14_Kc IF_pMT-eGFP_CID Cy2_GFP_Cy5_008.nd2	4	Kc IF_pMT-Cap-H2-eGFP_CID Cy2 GFP Cy3_005.nd2	5	3-27-14_Kc IF_Cap-H2-MBM-eGFP_CID Cy2_GFP_Cy5_006.nd2	4	3-25-14_Kc IF_CID Cy2_GFP_Cy5_001.nd2	5	Kc IF_Cid Cy2 and GFP Cy3_Cap-H2-MBMdC23-GFP_ Rep2_set1_003.nd2	4
3-27-14_Kc IF_pMT-eGFP_CID Cy2_GFP_Cy5_001.nd2	4	Kc IF_pMT-Cap-H2-eGFP_CID Cy2 GFP Cy3_005.nd2	5	3-27-14_Kc IF_Cap-H2-MBM-eGFP_CID Cy2_GFP_Cy5_006.nd2	4	3-25-14_Kc IF_CID Cy2_GFP_Cy5_008.nd2	5	Kc IF_Cid Cy2 and GFP Cy3_Cap-H2-MBMdC23-GFP_ Rep2_set1_003.nd2	4
3-27-14_Kc IF_pMT-eGFP_CID Cy2_GFP_Cy5_001.nd2	4	Kc IF_pMT-Cap-H2-eGFP_CID Cy2 GFP Cy3_005.nd2	5	3-27-14_Kc IF_Cap-H2-MBM-eGFP_CID Cy2_GFP_Cy5_006.nd2	4	3-25-14_Kc IF_CID Cy2_GFP_Cy5_008.nd2	5	Kc IF_Cid Cy2 and GFP Cy3_Cap-H2-MBMdC23-GFP_ Rep2_set1_003.nd2	4
3-27-14_Kc IF_pMT-eGFP_CID Cy2_GFP_Cy5_001.nd2	4	Kc IF_pMT-Cap-H2-eGFP_CID Cy2 GFP Cy3_005.nd2	5	3-27-14_Kc IF_Cap-H2-MBM-eGFP_CID Cy2_GFP_Cy5_006.nd2	4	3-25-14_Kc IF_CID Cy2_GFP_Cy5_006.nd2	5	Kc IF_Cid Cy2 and GFP Cy3_Cap-H2-MBMdC23-GFP_ Rep2_set1_003.nd2	4
3-27-14_Kc IF_pMT-eGFP_CID Cy2_GFP_Cy5_001.nd2	4	Kc IF_pMT-Cap-H2-eGFP_CID Cy2 GFP Cy3_007.nd2	5	3-27-14_Kc IF_Cap-H2-MBM-eGFP_CID Cy2_GFP_Cy5_007.nd2	4	3-25-14_Kc IF_CID Cy2_GFP_Cy5_008.nd2	5	Kc IF_Cid Cy2 and GFP Cy3_Cap-H2-MBMdC23-GFP_ Rep2_set1_003.nd2	4
3-27-14_Kc IF_pMT-eGFP_CID Cy2_GFP_Cy5_001.nd2	4	Kc IF_pMT-Cap-H2-eGFP_CID Cy2 GFP Cy3_007.nd2	5	3-27-14_Kc IF_Cap-H2-MBM-eGFP_CID Cy2_GFP_Cy5_007.nd2	4	3-25-14_Kc IF_CID Cy2_GFP_Cy5_004.nd2	5	Kc IF_Cid Cy2 and GFP Cy3_Cap-H2-MBMdC23-GFP_ Rep2_set1_003.nd2	4
3-27-14_Kc IF_pMT-eGFP_CID Cy2_GFP_Cy5_001.nd2	4	Kc IF_pMT-Cap-H2-eGFP_CID Cy2 GFP Cy3_007.nd2	5	3-27-14_Kc IF_Cap-H2-MBM-eGFP_CID Cy2_GFP_Cy5_007.nd2	4	3-25-14_Kc IF_CID Cy2_GFP_Cy5_002.nd2	5	Kc IF_Cid Cy2 and GFP Cy3_Cap-H2-MBMdC23-GFP_ Rep2_set1_004.nd2	4
3-27-14_Kc IF_pMT-eGFP_CID Cy2_GFP_Cy5_001.nd2	4	Kc IF_pMT-Cap-H2-eGFP_CID Cy2 GFP Cy3_007.nd2	5	3-27-14_Kc IF_Cap-H2-MBM-eGFP_CID Cy2_GFP_Cy5_007.nd2	4	3-25-14_Kc IF_CID Cy2_GFP_Cy5_002.nd2	5	Kc IF_Cid Cy2 and GFP Cy3_Cap-H2-MBMdC23-GFP_ Rep2_set1_004.nd2	4
3-27-14_Kc IF_pMT-eGFP_CID Cy2_GFP_Cy5_001.nd2	4	Kc IF_pMT-Cap-H2-eGFP_CID Cy2 GFP Cy3_007.nd2	5	3-27-14_Kc IF_Cap-H2-MBM-eGFP_CID Cy2_GFP_Cy5_008.nd2	4	3-25-14_Kc IF_CID Cy2_GFP_Cy5_006.nd2	5	Kc IF_Cid Cy2 and GFP Cy3_Cap-H2-MBMdC23-GFP_ Rep2_set1_004.nd2	4
3-27-14_Kc IF_pMT-eGFP_CID Cy2_GFP_Cy5_002.nd2	4	Kc IF_pMT-Cap-H2-eGFP_CID Cy2 GFP Cy3_006.nd2	5	3-27-14_Kc IF_Cap-H2-MBM-eGFP_CID Cy2_GFP_Cy5_008.nd2	4	3-25-14_Kc IF_CID Cy2_GFP_Cy5_006.nd2	5	Kc IF_Cid Cy2 and GFP Cy3_Cap-H2-MBMdC23-GFP_ Rep2_set1_005.nd2	4
3-27-14_Kc IF_pMT-eGFP_CID Cy2_GFP_Cy5_002.nd2	4	Kc IF_pMT-Cap-H2-eGFP_CID Cy2 GFP Cy3_006.nd2	5	3-27-14_Kc IF_Cap-H2-MBM-eGFP_CID Cy2_GFP_Cy5_008.nd2	4	3-25-14_Kc IF_Cap-h2-dC23-eGFP_CID Cy2_GFP_Cy5_locali1002.nd2	5	Kc IF_Cid Cy2 and GFP Cy3_Cap-H2-MBMdC23-GFP_ Rep2_set2_001.nd2	4
3-27-14_Kc IF_pMT-eGFP_CID Cy2_GFP_Cy5_002.nd2	4	Kc IF_pMT-Cap-H2-eGFP_CID Cy2 GFP Cy3_006.nd2	5	3-25-14_Kc IF_Cap-h2-MBM-eGFP_CID Cy2_GFP_Cy5_locali1004.nd2	4	3-25-14_Kc IF_CID Cy2_GFP_Cy5_007.nd2	5	Kc IF_Cid Cy2 and GFP Cy3_Cap-H2-MBMdC23-GFP_ Rep2_set2_001.nd2	4
3-27-14_Kc IF_pMT-eGFP_CID Cy2_GFP_Cy5_002.nd2	4	Kc IF_pMT-Cap-H2-eGFP_CID Cy2 GFP Cy3_good locali003.nd2	5	3-25-14_Kc IF_Cap-h2-MBM-eGFP_CID Cy2_GFP_Cy5_locali1004.nd2	4	3-25-14_Kc IF_CID Cy2_GFP_Cy5_008.nd2	5	Kc IF_Cid Cy2 and GFP Cy3_Cap-H2-MBMdC23-GFP_ Rep2_set2_002.nd2	4
3-27-14_Kc IF_pMT-eGFP_CID Cy2_GFP_Cy5_003.nd2	4	Kc IF_pMT-Cap-H2-eGFP_CID Cy2 GFP Cy3_008.nd2	5	3-25-14_Kc IF_Cap-h2-MBM-eGFP_CID Cy2_GFP_Cy5_locali1005.nd2	4	3-25-14_Kc IF_Cap-h2-dC23-eGFP_CID Cy2_GFP_Cy5_locali1002.nd2	5	Kc IF_Cid Cy2 and GFP Cy3_Cap-H2-MBMdC23-GFP_ Rep2_set2_002.nd2	4
3-27-14_Kc IF_pMT-eGFP_CID Cy2_GFP_Cy5_003.nd2	4	Kc IF_pMT-Cap-H2-eGFP_CID Cy2 GFP Cy3_008.nd2	5	3-25-14_Kc IF_Cap-h2-MBM-eGFP_CID Cy2_GFP_Cy5_locali1005.nd2	4	3-25-14_Kc IF_CID Cy2_GFP_Cy5_005.nd2	5	Kc IF_Cid Cy2 and GFP Cy3_Cap-H2-MBMdC23-GFP_ Rep2_set2_003.nd2	4
3-27-14_Kc IF_pMT-eGFP_CID Cy2_GFP_Cy5_003.nd2	4	Kc IF_pMT-Cap-H2-eGFP_CID Cy2 GFP Cy3_008.nd2	5	3-25-14_Kc IF_Cap-h2-MBM-eGFP_CID Cy2_GFP_Cy5_locali1005.nd2	4	3-25-14_Kc IF_CID Cy2_GFP_Cy5_007.nd2	5	Kc IF_Cid Cy2 and GFP Cy3_Cap-H2-MBMdC23-GFP_ Rep2_set2_003.nd2	4
3-25-14_Kc IF_pMT-eGFP_CID Cy2_GFP_Cy5_locali1007.nd2	4	Kc IF_pMT-Cap-H2-eGFP_CID Cy2 GFP Cy3_008.nd2	5	3-27-14_Kc IF_Cap-H2-MBM-eGFP_CID Cy2_GFP_Cy5_001.nd2	4	3-25-14_Kc IF_CID Cy2_GFP_Cy5_003.nd2	5	Kc IF_Cid Cy2 and GFP Cy3_Cap-H2-MBMdC23-GFP_ Rep2_set2_003.nd2	4
3-25-14_Kc IF_pMT-eGFP_CID Cy2_GFP_Cy5_locali1007.nd2	4	Kc IF_pMT-Cap-H2-eGFP_CID Cy2 GFP Cy3_008.nd2	5	3-27-14_Kc IF_Cap-H2-MBM-eGFP_CID Cy2_GFP_Cy5_001.nd2	4	3-25-14_Kc IF_Cap-h2-dC23-eGFP_CID Cy2_GFP_Cy5_locali1001.nd2	5	Kc IF_Cid Cy2 and GFP Cy3_Cap-H2-MBMdC23-GFP_ Rep2_set2_003.nd2	4
3-27-14_Kc IF_pMT-eGFP_CID Cy2_GFP_Cy5_004.nd2	4	Kc IF_pMT-Cap-H2-eGFP_CID Cy2 GFP Cy3_008.nd2	5	3-27-14_Kc IF_Cap-H2-MBM-eGFP_CID Cy2_GFP_Cy5_001.nd2	4	3-25-14_Kc IF_CID Cy2_GFP_Cy5_005.nd2	5	Kc IF_Cid Cy2 and GFP Cy3_Cap-H2-MBMdC23-GFP_ Rep2_set2_003.nd2	4
3-27-14_Kc IF_pMT-eGFP_CID Cy2_GFP_Cy5_002.nd2	4	Kc IF_pMT-Cap-H2-eGFP_CID Cy2 GFP Cy3_008.nd2	5	3-27-14_Kc IF_Cap-H2-MBM-eGFP_CID Cy2_GFP_Cy5_001.nd2	4	3-25-14_Kc IF_CID Cy2_GFP_Cy5_006.nd2	5	Kc IF_Cid Cy2 and GFP Cy3_Cap-H2-MBMdC23-GFP_ Rep2_set2_003.nd2	4
3-27-14_Kc IF_pMT-eGFP_CID Cy2_GFP_Cy5_002.nd2	4	3-27-14_Kc IF_Cap-H2-eGFP_CID Cy2_GFP_Cy5_004.nd2	5	Kc IF_pMT-Cap-H2-MBM-eGFP_CID Cy2 GFP Cy3_001.nd2	5	3-25-14_Kc IF_CID Cy2_GFP_Cy5_001.nd2	5	Kc IF_Cid Cy2 and GFP Cy3_Cap-H2-MBMdC23-GFP_ Rep2_set2_004.nd2	4
3-27-14_Kc IF_pMT-eGFP_CID Cy2_GFP_Cy5_008.nd2	4	3-27-14_Kc IF_Cap-H2-eGFP_CID Cy2_GFP_Cy5_004.nd2	5	Kc IF_pMT-Cap-H2-MBM-eGFP_CID Cy2 GFP Cy3_001.nd2	5	3-25-14_Kc IF_CID Cy2_GFP_Cy5_003.nd2	5	Kc IF_Cid Cy2 and GFP Cy3_Cap-H2-MBMdC23-GFP_ Rep2_set2_004.nd2	4
Kc IF_pMT-eGFP_CID Cy2 GFP Cy3_003.nd2	5	3-27-14_Kc IF_Cap-H2-eGFP_CID Cy2_GFP_Cy5_004.nd2	5	Kc IF_pMT-Cap-H2-MBM-eGFP_CID Cy2 GFP Cy3_001.nd2	5	3-25-14_Kc IF_CID Cy2_GFP_Cy5_008.nd2	5	Kc IF_Cid Cy2 and GFP Cy3_Cap-H2-MBMdC23-GFP_ Rep2_set2_004.nd2	4
Kc IF_pMT-eGFP_CID Cy2 GFP Cy3_003.nd2	5	3-27-14_Kc IF_Cap-H2-eGFP_CID Cy2_GFP_Cy5_004.nd2	5	Kc IF_pMT-Cap-H2-MBM-eGFP_CID Cy2 GFP Cy3_001.nd2	5	3-25-14_Kc IF_CID Cy2_GFP_Cy5_008.nd2	5	Kc IF_Cid Cy2 and GFP Cy3_Cap-H2-MBMdC23-GFP_ Rep2_set2_004.nd2	4
Kc IF_pMT-eGFP_CID Cy2 GFP Cy3_003.nd2	5	3-27-14_Kc IF_Cap-H2-eGFP_CID Cy2_GFP_Cy5_004.nd2	5	Kc IF_pMT-Cap-H2-MBM-eGFP_CID Cy2 GFP Cy3_001.nd2	5	3-25-14_Kc IF_CID Cy2_GFP_Cy5_006.nd2	5	Kc IF_Cid Cy2 and GFP Cy3_Cap-H2-MBMdC23-GFP_ Rep2_set2_004.nd2	4
Kc IF_pMT-eGFP_CID Cy2 GFP Cy3_003.nd2	5	3-27-14_Kc IF_Cap-H2-eGFP_CID Cy2_GFP_Cy5_005.nd2	5	Kc IF_pMT-Cap-H2-MBM-eGFP_CID Cy2 GFP Cy3_009.nd2	5	3-25-14_Kc IF_CID Cy2_GFP_Cy5_002.nd2	5	Kc IF_Cid Cy2 and GFP Cy3_Cap-H2-MBMdC23-GFP_ Rep2_set2_005.nd2	4
Kc IF_pMT-eGFP_CID Cy2 GFP Cy3_002.nd2	5	3-27-14_Kc IF_Cap-H2-eGFP_CID Cy2_GFP_Cy5_005.nd2	5	Kc IF_pMT-Cap-H2-MBM-eGFP_CID Cy2 GFP Cy3_009.nd2	5	3-25-14_Kc IF_CID Cy2_GFP_Cy5_006.nd2	5	Kc IF_Cid Cy2 and GFP Cy3_Cap-H2-MBMdC23-GFP_ Rep2_set2_005.nd2	4
Kc IF_pMT-eGFP_CID Cy2 GFP Cy3_002.nd2	5	3-27-14_Kc IF_Cap-H2-eGFP_CID Cy2_GFP_Cy5_005.nd2	5	Kc IF_pMT-Cap-H2-MBM-eGFP_CID Cy2 GFP Cy3_009.nd2	5	3-25-14_Kc IF_Cap-h2-dC23-eGFP_CID Cy2_GFP_Cy5_locali1002.nd2	5	Kc IF_Cid Cy2 and GFP Cy3_Cap-H2-MBMdC23-GFP_ Rep2_set2_005.nd2	4
Kc IF_pMT-eGFP_CID Cy2 GFP Cy3_001.nd2	5	3-27-14_Kc IF_Cap-H2-eGFP_CID Cy2_GFP_Cy5_005.nd2	5	Kc IF_pMT-Cap-H2-MBM-eGFP_CID Cy2 GFP Cy3_009.nd2	5	3-25-14_Kc IF_Cap-h2-dC23-eGFP_CID Cy2_GFP_Cy5_locali1002.nd2	5	Kc IF_Cid Cy2 and GFP Cy3_Cap-H2-MBMdC23-GFP_ Rep2_set2_005.nd2	4
Kc IF_pMT-eGFP_CID Cy2 GFP Cy3_001.nd2	5	3-27-14_Kc IF_Cap-H2-eGFP_CID Cy2_GFP_Cy5_005.nd2	5	Kc IF_pMT-Cap-H2-MBM-eGFP_CID Cy2 GFP Cy3_009.nd2	5	3-25-14_Kc IF_Cap-h2-dC23-eGFP_CID Cy2_GFP_Cy5_locali1001.nd2	5	Kc IF_Cid Cy2 and GFP Cy3_Cap-H2-MBMdC23-GFP_ Rep2_set2_005.nd2	4
Kc IF_pMT-eGFP_CID Cy2 GFP Cy3_001.nd2	5	3-27-14_Kc IF_Cap-H2-eGFP_CID Cy2_GFP_Cy5_005.nd2	5	Kc IF_pMT-Cap-H2-MBM-eGFP_CID Cy2 GFP Cy3_009.nd2	5	3-25-14_Kc IF_CID Cy2_GFP_Cy5_001.nd2	5	Kc IF_Cid Cy2 and GFP Cy3_Cap-H2-MBMdC23-GFP_ Rep2_set2_006.nd2	4
Kc IF_pMT-eGFP_CID Cy2 GFP Cy3_001.nd2	5	3-27-14_Kc IF_Cap-H2-eGFP_CID Cy2_GFP_Cy5_005.nd2	5	Kc IF_pMT-Cap-H2-MBM-eGFP_CID Cy2 GFP Cy3_009.nd2	5	3-25-14_Kc IF_CID Cy2_GFP_Cy5_005.nd2	5	Kc IF_Cid Cy2 and GFP Cy3_Cap-H2-MBMdC23-GFP_ Rep2_set2_006.nd2	4
Kc IF_pMT-eGFP_CID Cy2 GFP Cy3_good locali004.nd2	5	3-27-14_Kc IF_Cap-H2-eGFP_CID Cy2_GFP_Cy5_006.nd2	5	Kc IF_pMT-Cap-H2-MBM-eGFP_CID Cy2 GFP Cy3_009.nd2	5	3-25-14_Kc IF_Cap-h2-dC23-eGFP_CID Cy2_GFP_Cy5_locali1001.nd2	5	Kc IF_Cid Cy2 and GFP Cy3_Cap-H2-MBMdC23-GFP_ Rep2_set2_007.nd2	4
Kc IF_pMT-eGFP_CID Cy2 GFP Cy3_good locali004.nd2	5	3-27-14_Kc IF_Cap-H2-eGFP_CID Cy2_GFP_Cy5_006.nd2	5	Kc IF_pMT-Cap-H2-MBM-eGFP_CID Cy2 GFP Cy3_009.nd2	5	3-25-14_Kc IF_CID Cy2_GFP_Cy5_007.nd2	5	Kc IF_Cid Cy2 and GFP Cy3_Cap-H2-MBMdC23-GFP_ Rep2_set2_008.nd2	4
Kc IF_pMT-eGFP_CID Cy2 GFP Cy3_008.nd2	5	3-27-14_Kc IF_Cap-H2-eGFP_CID Cy2_GFP_Cy5_006.nd2	5	Kc IF_pMT-Cap-H2-MBM-eGFP_CID Cy2 GFP Cy3_009.nd2	5	3-25-14_Kc IF_Cap-h2-dC23-eGFP_CID Cy2_GFP_Cy5_locali1002.nd2	5	Kc IF_Cid Cy2 and GFP Cy3_Cap-H2-MBMdC23-GFP_ Rep2_set2_008.nd2	4
Kc IF_pMT-eGFP_CID Cy2 GFP Cy3_008.nd2	5	3-27-14_Kc IF_Cap-H2-eGFP_CID Cy2_GFP_Cy5_006.nd2	5	Kc IF_pMT-Cap-H2-MBM-eGFP_CID Cy2 GFP Cy3_004.nd2	5	3-25-14_Kc IF_Cap-h2-dC23-eGFP_CID Cy2_GFP_Cy5_locali1002.nd2	5	Kc IF_Cid Cy2 and GFP Cy3_Cap-H2-MBMdC23-GFP_ Rep2_set2_008.nd2	4
Kc IF_pMT-eGFP_CID Cy2 GFP Cy3_008.nd2	5	3-27-14_Kc IF_Cap-H2-eGFP_CID Cy2_GFP_Cy5_006.nd2	5	Kc IF_pMT-Cap-H2-MBM-eGFP_CID Cy2 GFP Cy3_004.nd2	5	3-25-14_Kc IF_CID Cy2_GFP_Cy5_008.nd2	5	Kc IF_Cid Cy2 and GFP Cy3_Cap-H2-MBMdC23-GFP_ Rep2_set2_008.nd2	4
Kc IF_pMT-eGFP_CID Cy2 GFP Cy3_008.nd2	5	3-27-14_Kc IF_Cap-H2-eGFP_CID Cy2_GFP_Cy5_006.nd2	5	Kc IF_pMT-Cap-H2-MBM-eGFP_CID Cy2 GFP Cy3_004.nd2	5	3-25-14_Kc IF_CID Cy2_GFP_Cy5_007.nd2	5	3-25-14_Kc IF_Cap-h2-MBM-dC23-eGFP_CID Cy2_GFP_Cy5_004.nd2	5
Kc IF_pMT-eGFP_CID Cy2 GFP Cy3_008.nd2	5	3-27-14_Kc IF_Cap-H2-eGFP_CID Cy2_GFP_Cy5_006.nd2	5	Kc IF_pMT-Cap-H2-MBM-eGFP_CID Cy2 GFP Cy3_008.nd2	5	3-25-14_Kc IF_CID Cy2_GFP_Cy5_003.nd2	5	3-25-14_Kc IF_Cap-h2-MBM-dC23-eGFP_CID Cy2_GFP_Cy5_008.nd2	5
Kc IF_pMT-eGFP_CID Cy2 GFP Cy3_008.nd2	5	3-27-14_Kc IF_Cap-H2-eGFP_CID Cy2_GFP_Cy5_007.nd2	5	Kc IF_pMT-Cap-H2-MBM-eGFP_CID Cy2 GFP Cy3_005.nd2	5	Kc IF_pMT-Cap-H2-dC23-eGFP_CID Cy2 GFP Cy3_good locali001.nd2	5	3-25-14_Kc IF_Cap-h2-MBM-dC23-eGFP_CID Cy2_GFP_Cy5_007.nd2	5
Kc IF_pMT-eGFP_CID Cy2 GFP Cy3_008.nd2	5	3-27-14_Kc IF_Cap-H2-eGFP_CID Cy2_GFP_Cy5_007.nd2	5	Kc IF_pMT-Cap-H2-MBM-eGFP_CID Cy2 GFP Cy3_005.nd2	5	Kc IF_pMT-Cap-H2-dC23-eGFP_CID Cy2 GFP Cy3_009.nd2	5	3-25-14_Kc IF_Cap-h2-MBM-dC23-eGFP_CID Cy2_GFP_Cy5_004.nd2	5
Kc IF_pMT-eGFP_CID Cy2 GFP Cy3_007.nd2	5	3-27-14_Kc IF_Cap-H2-eGFP_CID Cy2_GFP_Cy5_007.nd2	5	Kc IF_pMT-Cap-H2-MBM-eGFP_CID Cy2 GFP Cy3_006.nd2	5	Kc IF_pMT-Cap-H2-dC23-eGFP_CID Cy2 GFP Cy3_009.nd2	5	3-25-14_Kc IF_Cap-h2-MBM-dC23-eGFP_CID Cy2_GFP_Cy5_003.nd2	5
Kc IF_pMT-eGFP_CID Cy2 GFP Cy3_007.nd2	5	3-27-14_Kc IF_Cap-H2-eGFP_CID Cy2_GFP_Cy5_008.nd2	5	Kc IF_pMT-Cap-H2-MBM-eGFP_CID Cy2 GFP Cy3_006.nd2	5	Kc IF_pMT-Cap-H2-dC23-eGFP_CID Cy2 GFP Cy3_005.nd2	5	3-25-14_Kc IF_Cap-h2-MBM-dC23-eGFP_CID Cy2_GFP_Cy5_008.nd2	5
Kc IF_pMT-eGFP_CID Cy2 GFP Cy3_007.nd2	5	3-27-14_Kc IF_Cap-H2-eGFP_CID Cy2_GFP_Cy5_008.nd2	5	Kc IF_pMT-Cap-H2-MBM-eGFP_CID Cy2 GFP Cy3_007.nd2	5	Kc IF_pMT-Cap-H2-dC23-eGFP_CID Cy2 GFP Cy3_003.nd2	5	3-25-14_Kc IF_Cap-h2-MBdC23-eGFP_CID Cy2_GFP_Cy5_locali1003.nd2	5
Kc IF_pMT-eGFP_CID Cy2 GFP Cy3_007.nd2	5	3-27-14_Kc IF_Cap-H2-eGFP_CID Cy2_GFP_Cy5_008.nd2	5	Kc IF_pMT-Cap-H2-MBM-eGFP_CID Cy2 GFP Cy3_002.nd2	5	Kc IF_pMT-Cap-H2-dC23-eGFP_CID Cy2 GFP Cy3_004.nd2	5	3-25-14_Kc IF_Cap-h2-MBM-dC23-eGFP_CID Cy2_GFP_Cy5_008.nd2	5
Kc IF_pMT-eGFP_CID Cy2 GFP Cy3_006.nd2	5	3-27-14_Kc IF_Cap-H2-eGFP_CID Cy2_GFP_Cy5_locali1007.nd2	5	Kc IF_pMT-Cap-H2-MBM-eGFP_CID Cy2 GFP Cy3_003.nd2	5	Kc IF_pMT-Cap-H2-dC23-eGFP_CID Cy2 GFP Cy3_007.nd2	5	3-25-14_Kc IF_Cap-h2-MBM-dC23-eGFP_CID Cy2_GFP_Cy5_001.nd2	5
Kc IF_pMT-eGFP_CID Cy2 GFP Cy3_006.nd2	5	3-27-14_Kc IF_Cap-H2-eGFP_CID Cy2_GFP_Cy5_locali1007.nd2	5	Kc IF_pMT-Cap-H2-MBM-eGFP_CID Cy2 GFP Cy3_003.nd2	5	Kc IF_pMT-Cap-H2-dC23-eGFP_CID Cy2 GFP Cy3_006.nd2	5	3-25-14_Kc IF_Cap-h2-MBM-dC23-eGFP_CID Cy2_GFP_Cy5_005.nd2	5
Kc IF_pMT-eGFP_CID Cy2 GFP Cy3_006.nd2	5	3-27-14_Kc IF_Cap-H2-eGFP_CID Cy2_GFP_Cy5_locali1007.nd2	5	Kc IF_pMT-Cap-H2-MBM-eGFP_CID Cy2 GFP Cy3_good locali.nd2	5	Kc IF_pMT-Cap-H2-dC23-eGFP_CID Cy2 GFP Cy3_001.nd2	5	3-25-14_Kc IF_Cap-h2-MBM-dC23-eGFP_CID Cy2_GFP_Cy5_002.nd2	5
Kc IF_pMT-eGFP_CID Cy2 GFP Cy3_006.nd2	5	3-27-14_Kc IF_Cap-H2-eGFP_CID Cy2_GFP_Cy5_locali1007.nd2	5	Kc IF_pMT-Cap-H2-MBM-eGFP_CID Cy2 GFP Cy3_good locali.nd2	5	Kc IF_pMT-Cap-H2-dC23-eGFP_CID Cy2 GFP Cy3_009.nd2	5	3-25-14_Kc IF_Cap-h2-MBM-dC23-eGFP_CID Cy2_GFP_Cy5_001.nd2	5
Kc IF_pMT-eGFP_CID Cy2 GFP Cy3_006.nd2	5	3-25-14_Kc IF_Cap-h2-eGFP_CID Cy2_GFP_Cy5_locali1006.nd2	5	Kc IF_pMT-Cap-H2-MBM-eGFP_CID Cy2 GFP Cy3_good locali.nd2	5	Kc IF_pMT-Cap-H2-dC23-eGFP_CID Cy2 GFP Cy3_008.nd2	5	3-25-14_Kc IF_Cap-h2-MBM-dC23-eGFP_CID Cy2_GFP_Cy5_002.nd2	5
Kc IF_pMT-eGFP_CID Cy2 GFP Cy3_005.nd2	5	3-25-14_Kc IF_Cap-h2-eGFP_CID Cy2_GFP_Cy5_locali1006.nd2	5	3-27-14_Kc IF_Cap-H2-MBM-eGFP_CID Cy2_GFP_Cy5_002.nd2	5	Kc IF_pMT-Cap-H2-dC23-eGFP_CID Cy2 GFP Cy3_003.nd2	5	3-25-14_Kc IF_Cap-h2-MBM-dC23-eGFP_CID Cy2_GFP_Cy5_001.nd2	5
Kc IF_pMT-eGFP_CID Cy2 GFP Cy3_005.nd2	5	3-27-14_Kc IF_Cap-H2-eGFP_CID Cy2_GFP_Cy5_002.nd2	5	3-27-14_Kc IF_Cap-H2-MBM-eGFP_CID Cy2_GFP_Cy5_002.nd2	5	Kc IF_pMT-Cap-H2-dC23-eGFP_CID Cy2 GFP Cy3_002.nd2	5	3-25-14_Kc IF_Cap-h2-MBM-dC23-eGFP_CID Cy2_GFP_Cy5_003.nd2	5
Kc IF_pMT-eGFP_CID Cy2 GFP Cy3_004.nd2	5	3-27-14_Kc IF_Cap-H2-eGFP_CID Cy2_GFP_Cy5_002.nd2	5	3-27-14_Kc IF_Cap-H2-MBM-eGFP_CID Cy2_GFP_Cy5_002.nd2	5	Kc IF_pMT-Cap-H2-dC23-eGFP_CID Cy2 GFP Cy3_006.nd2	5	3-25-14_Kc IF_Cap-h2-MBM-dC23-eGFP_CID Cy2_GFP_Cy5_004.nd2	5
Kc IF_pMT-eGFP_CID Cy2 GFP Cy3_004.nd2	5	3-27-14_Kc IF_Cap-H2-eGFP_CID Cy2_GFP_Cy5_002.nd2	5	3-27-14_Kc IF_Cap-H2-MBM-eGFP_CID Cy2_GFP_Cy5_003.nd2	5	Kc IF_pMT-Cap-H2-dC23-eGFP_CID Cy2 GFP Cy3_004.nd2	5	3-25-14_Kc IF_Cap-h2-MBM-dC23-eGFP_CID Cy2_GFP_Cy5_001.nd2	5
3-27-14_Kc IF_pMT-eGFP_CID Cy2_GFP_Cy5_004.nd2	5	3-27-14_Kc IF_Cap-H2-eGFP_CID Cy2_GFP_Cy5_002.nd2	5	3-27-14_Kc IF_Cap-H2-MBM-eGFP_CID Cy2_GFP_Cy5_003.nd2	5	Kc IF_pMT-Cap-H2-dC23-eGFP_CID Cy2 GFP Cy3_005.nd2	5	3-25-14_Kc IF_Cap-h2-MBM-dC23-eGFP_CID Cy2_GFP_Cy5_001.nd2	5
3-27-14_Kc IF_pMT-eGFP_CID Cy2_GFP_Cy5_004.nd2	5	3-27-14_Kc IF_Cap-H2-eGFP_CID Cy2_GFP_Cy5_003.nd2	5	3-27-14_Kc IF_Cap-H2-MBM-eGFP_CID Cy2_GFP_Cy5_003.nd2	5	Kc IF_pMT-Cap-H2-dC23-eGFP_CID Cy2 GFP Cy3_008.nd2	5	3-25-14_Kc IF_Cap-h2-MBM-dC23-eGFP_CID Cy2_GFP_Cy5_002.nd2	5
3-27-14_Kc IF_pMT-eGFP_CID Cy2_GFP_Cy5_005.nd2	5	3-27-14_Kc IF_Cap-H2-eGFP_CID Cy2_GFP_Cy5_003.nd2	5	3-27-14_Kc IF_Cap-H2-MBM-eGFP_CID Cy2_GFP_Cy5_004.nd2	5	Kc IF_pMT-Cap-H2-dC23-eGFP_CID Cy2 GFP Cy3_002.nd2	5	3-25-14_Kc IF_Cap-h2-MBM-dC23-eGFP_CID Cy2_GFP_Cy5_008.nd2	5
3-27-14_Kc IF_pMT-eGFP_CID Cy2_GFP_Cy5_005.nd2	5	3-27-14_Kc IF_Cap-H2-eGFP_CID Cy2_GFP_Cy5_003.nd2	5	3-27-14_Kc IF_Cap-H2-MBM-eGFP_CID Cy2_GFP_Cy5_004.nd2	5	Kc IF_pMT-Cap-H2-dC23-eGFP_CID Cy2 GFP Cy3_002.nd2	5	3-25-14_Kc IF_Cap-h2-MBM-dC23-eGFP_CID Cy2_GFP_Cy5_002.nd2	5
3-27-14_Kc IF_pMT-eGFP_CID Cy2_GFP_Cy5_005.nd2	5	3-27-14_Kc IF_Cap-H2-eGFP_CID Cy2_GFP_Cy5_003.nd2	5	3-27-14_Kc IF_Cap-H2-MBM-eGFP_CID Cy2_GFP_Cy5_004.nd2	5	Kc IF_pMT-Cap-H2-dC23-eGFP_CID Cy2 GFP Cy3_004.nd2	5	3-25-14_Kc IF_Cap-h2-MBM-dC23-eGFP_CID Cy2_GFP_Cy5_008.nd2	5
3-27-14_Kc IF_pMT-eGFP_CID Cy2_GFP_Cy5_005.nd2	5	3-27-14_Kc IF_Cap-H2-eGFP_CID Cy2_GFP_Cy5_003.nd2	5	3-27-14_Kc IF_Cap-H2-MBM-eGFP_CID Cy2_GFP_Cy5_004.nd2	5	Kc IF_pMT-Cap-H2-dC23-eGFP_CID Cy2 GFP Cy3_008.nd2	5	3-25-14_Kc IF_Cap-h2-MBM-dC23-eGFP_CID Cy2_GFP_Cy5_001.nd2	5
3-27-14_Kc IF_pMT-eGFP_CID Cy2_GFP_Cy5_005.nd2	5	3-27-14_Kc IF_Cap-H2-eGFP_CID Cy2_GFP_Cy5_003.nd2	5	3-27-14_Kc IF_Cap-H2-MBM-eGFP_CID Cy2_GFP_Cy5_004.nd2	5	Kc IF_pMT-Cap-H2-dC23-eGFP_CID Cy2 GFP Cy3_002.nd2	5	3-25-14_Kc IF_Cap-h2-MBM-dC23-eGFP_CID Cy2_GFP_Cy5_004.nd2	5
3-27-14_Kc IF_pMT-eGFP_CID Cy2_GFP_Cy5_006.nd2	5	3-27-14_Kc IF_Cap-H2-eGFP_CID Cy2_GFP_Cy5_003.nd2	5	3-27-14_Kc IF_Cap-H2-MBM-eGFP_CID Cy2_GFP_Cy5_004.nd2	5	Kc IF_pMT-Cap-H2-dC23-eGFP_CID Cy2 GFP Cy3_002.nd2	5	3-25-14_Kc IF_Cap-h2-MBM-dC23-eGFP_CID Cy2_GFP_Cy5_002.nd2	5
3-27-14_Kc IF_pMT-eGFP_CID Cy2_GFP_Cy5_006.nd2	5	Kc IF_pMT-Cap-H2-eGFP_CID Cy2 GFP Cy3_004.nd2	6	3-27-14_Kc IF_Cap-H2-MBM-eGFP_CID Cy2_GFP_Cy5_005.nd2	5	Kc IF_pMT-Cap-H2-dC23-eGFP_CID Cy2 GFP Cy3_good locali002.nd2	5	3-25-14_Kc IF_Cap-h2-MBM-dC23-eGFP_CID Cy2_GFP_Cy5_001.nd2	5
3-27-14_Kc IF_pMT-eGFP_CID Cy2_GFP_Cy5_006.nd2	5	Kc IF_pMT-Cap-H2-eGFP_CID Cy2 GFP Cy3_004.nd2	6	3-27-14_Kc IF_Cap-H2-MBM-eGFP_CID Cy2_GFP_Cy5_006.nd2	5	Kc IF_pMT-Cap-H2-dC23-eGFP_CID Cy2 GFP Cy3_001.nd2	5	3-25-14_Kc IF_Cap-h2-MBM-dC23-eGFP_CID Cy2_GFP_Cy5_006.nd2	5
3-27-14_Kc IF_pMT-eGFP_CID Cy2_GFP_Cy5_007.nd2	5	Kc IF_pMT-Cap-H2-eGFP_CID Cy2 GFP Cy3_004.nd2	6	3-27-14_Kc IF_Cap-H2-MBM-eGFP_CID Cy2_GFP_Cy5_006.nd2	5	Kc IF_pMT-Cap-H2-dC23-eGFP_CID Cy2 GFP Cy3_good locali001.nd2	5	3-25-14_Kc IF_Cap-h2-MBM-dC23-eGFP_CID Cy2_GFP_Cy5_001.nd2	5
3-27-14_Kc IF_pMT-eGFP_CID Cy2_GFP_Cy5_007.nd2	5	Kc IF_pMT-Cap-H2-eGFP_CID Cy2 GFP Cy3_003.nd2	6	3-27-14_Kc IF_Cap-H2-MBM-eGFP_CID Cy2_GFP_Cy5_006.nd2	5	Kc IF_pMT-Cap-H2-dC23-eGFP_CID Cy2 GFP Cy3_good locali001.nd2	5	3-25-14_Kc IF_Cap-h2-MBM-dC23-eGFP_CID Cy2_GFP_Cy5_008.nd2	5
3-27-14_Kc IF_pMT-eGFP_CID Cy2_GFP_Cy5_007.nd2	5	Kc IF_pMT-Cap-H2-eGFP_CID Cy2 GFP Cy3_003.nd2	6	3-27-14_Kc IF_Cap-H2-MBM-eGFP_CID Cy2_GFP_Cy5_006.nd2	5	Kc IF_pMT-Cap-H2-dC23-eGFP_CID Cy2 GFP Cy3_001.nd2	5	3-25-14_Kc IF_Cap-h2-MBM-dC23-eGFP_CID Cy2_GFP_Cy5_004.nd2	5
3-27-14_Kc IF_pMT-eGFP_CID Cy2_GFP_Cy5_007.nd2	5	Kc IF_pMT-Cap-H2-eGFP_CID Cy2 GFP Cy3_003.nd2	6	3-27-14_Kc IF_Cap-H2-MBM-eGFP_CID Cy2_GFP_Cy5_007.nd2	5	Kc IF_pMT-Cap-H2-dC23-eGFP_CID Cy2 GFP Cy3_008.nd2	5	3-25-14_Kc IF_Cap-h2-MBM-dC23-eGFP_CID Cy2_GFP_Cy5_005.nd2	5
3-27-14_Kc IF_pMT-eGFP_CID Cy2_GFP_Cy5_008.nd2	5	Kc IF_pMT-Cap-H2-eGFP_CID Cy2 GFP Cy3_003.nd2	6	3-27-14_Kc IF_Cap-H2-MBM-eGFP_CID Cy2_GFP_Cy5_007.nd2	5	Kc IF_Cid Cy2 and GFP Cy3_Cap-H2-dC2-GFP_ Rep3_setting1_007.nd2	6	3-25-14_Kc IF_Cap-h2-MBM-dC23-eGFP_CID Cy2_GFP_Cy5_007.nd2	5
3-27-14_Kc IF_pMT-eGFP_CID Cy2_GFP_Cy5_008.nd2	5	Kc IF_pMT-Cap-H2-eGFP_CID Cy2 GFP Cy3_002.nd2	6	3-27-14_Kc IF_Cap-H2-MBM-eGFP_CID Cy2_GFP_Cy5_007.nd2	5	Kc IF_Cid Cy2 and GFP Cy3_Cap-H2-dC2-GFP_ Rep3_setting1_008.nd2	6	3-25-14_Kc IF_Cap-h2-MBM-dC23-eGFP_CID Cy2_GFP_Cy5_004.nd2	5
3-27-14_Kc IF_pMT-eGFP_CID Cy2_GFP_Cy5_008.nd2	5	Kc IF_pMT-Cap-H2-eGFP_CID Cy2 GFP Cy3_002.nd2	6	3-27-14_Kc IF_Cap-H2-MBM-eGFP_CID Cy2_GFP_Cy5_007.nd2	5	Kc IF_Cid Cy2 and GFP Cy3_Cap-H2-dC2-GFP_ Rep3_setting1_001.nd2	6	3-25-14_Kc IF_Cap-h2-MBM-dC23-eGFP_CID Cy2_GFP_Cy5_006.nd2	5
3-27-14_Kc IF_pMT-eGFP_CID Cy2_GFP_Cy5_001.nd2	5	Kc IF_pMT-Cap-H2-eGFP_CID Cy2 GFP Cy3_002.nd2	6	3-27-14_Kc IF_Cap-H2-MBM-eGFP_CID Cy2_GFP_Cy5_007.nd2	5	Kc IF_Cid Cy2 and GFP Cy3_Cap-H2-dC2-GFP_ Rep3_setting1_001.nd2	6	3-25-14_Kc IF_Cap-h2-MBM-dC23-eGFP_CID Cy2_GFP_Cy5_004.nd2	5
3-27-14_Kc IF_pMT-eGFP_CID Cy2_GFP_Cy5_001.nd2	5	Kc IF_pMT-Cap-H2-eGFP_CID Cy2 GFP Cy3_002.nd2	6	3-27-14_Kc IF_Cap-H2-MBM-eGFP_CID Cy2_GFP_Cy5_007.nd2	5	Kc IF_Cid Cy2 and GFP Cy3_Cap-H2-dC2-GFP_ Rep3_setting1_001.nd2	6	Kc IF_Cid Cy2 and GFP Cy3_Cap-H2-MBMdC23-GFP_ Rep3_set1_001.nd2	5
3-27-14_Kc IF_pMT-eGFP_CID Cy2_GFP_Cy5_001.nd2	5	Kc IF_pMT-Cap-H2-eGFP_CID Cy2 GFP Cy3_002.nd2	6	3-27-14_Kc IF_Cap-H2-MBM-eGFP_CID Cy2_GFP_Cy5_008.nd2	5	Kc IF_Cid Cy2 and GFP Cy3_Cap-H2-dC23-GFP_ Rep3_set2_001.nd2	6	Kc IF_Cid Cy2 and GFP Cy3_Cap-H2-MBMdC23-GFP_ Rep3_set1_001.nd2	5
3-27-14_Kc IF_pMT-eGFP_CID Cy2_GFP_Cy5_002.nd2	5	Kc IF_pMT-Cap-H2-eGFP_CID Cy2 GFP Cy3_002.nd2	6	3-27-14_Kc IF_Cap-H2-MBM-eGFP_CID Cy2_GFP_Cy5_008.nd2	5	Kc IF_Cid Cy2 and GFP Cy3_Cap-H2-dC23-GFP_ Rep3_set2_003.nd2	6	Kc IF_Cid Cy2 and GFP Cy3_Cap-H2-MBMdC23-GFP_ Rep3_set1_001.nd2	5
3-27-14_Kc IF_pMT-eGFP_CID Cy2_GFP_Cy5_003.nd2	5	Kc IF_pMT-Cap-H2-eGFP_CID Cy2 GFP Cy3_002.nd2	6	3-27-14_Kc IF_Cap-H2-MBM-eGFP_CID Cy2_GFP_Cy5_008.nd2	5	Kc IF_Cid Cy2 and GFP Cy3_Cap-H2-dC23-GFP_ Rep3_set2_003.nd2	6	Kc IF_Cid Cy2 and GFP Cy3_Cap-H2-MBMdC23-GFP_ Rep3_set1_002.nd2	5
Kc IF_pMT-eGFP_CID Cy2 GFP Cy3_003.nd2	6	Kc IF_pMT-Cap-H2-eGFP_CID Cy2 GFP Cy3_001.nd2	6	3-25-14_Kc IF_Cap-h2-MBM-eGFP_CID Cy2_GFP_Cy5_locali1004.nd2	5	Kc IF_Cid Cy2 and GFP Cy3_Cap-H2-dC23-GFP_ Rep3_set2_004.nd2	6	Kc IF_Cid Cy2 and GFP Cy3_Cap-H2-MBMdC23-GFP_ Rep3_set1_002.nd2	5
Kc IF_pMT-eGFP_CID Cy2 GFP Cy3_002.nd2	6	Kc IF_pMT-Cap-H2-eGFP_CID Cy2 GFP Cy3_001.nd2	6	3-25-14_Kc IF_Cap-h2-MBM-eGFP_CID Cy2_GFP_Cy5_locali1004.nd2	5	Kc IF_Cid Cy2 and GFP Cy3_Cap-H2-dC23-GFP_ Rep3_set2_008.nd2	6	Kc IF_Cid Cy2 and GFP Cy3_Cap-H2-MBMdC23-GFP_ Rep3_set1_002.nd2	5
Kc IF_pMT-eGFP_CID Cy2 GFP Cy3_good locali004.nd2	6	Kc IF_pMT-Cap-H2-eGFP_CID Cy2 GFP Cy3_005.nd2	6	3-25-14_Kc IF_Cap-h2-MBM-eGFP_CID Cy2_GFP_Cy5_locali1004.nd2	5	Kc IF_Cid Cy2 and GFP Cy3_Cap-H2-dC2-GFP_ Rep3_setting1_001.nd2	6	Kc IF_Cid Cy2 and GFP Cy3_Cap-H2-MBMdC23-GFP_ Rep3_set1_002.nd2	5
Kc IF_pMT-eGFP_CID Cy2 GFP Cy3_good locali004.nd2	6	Kc IF_pMT-Cap-H2-eGFP_CID Cy2 GFP Cy3_005.nd2	6	3-25-14_Kc IF_Cap-h2-MBM-eGFP_CID Cy2_GFP_Cy5_locali1004.nd2	5	Kc IF_Cid Cy2 and GFP Cy3_Cap-H2-dC2-GFP_ Rep3_setting1_001.nd2	6	Kc IF_Cid Cy2 and GFP Cy3_Cap-H2-MBMdC23-GFP_ Rep3_set1_003.nd2	5
Kc IF_pMT-eGFP_CID Cy2 GFP Cy3_good locali004.nd2	6	Kc IF_pMT-Cap-H2-eGFP_CID Cy2 GFP Cy3_005.nd2	6	3-25-14_Kc IF_Cap-h2-MBM-eGFP_CID Cy2_GFP_Cy5_locali1004.nd2	5	Kc IF_Cid Cy2 and GFP Cy3_Cap-H2-dC2-GFP_ Rep3_setting1_001.nd2	6	Kc IF_Cid Cy2 and GFP Cy3_Cap-H2-MBMdC23-GFP_ Rep3_set1_003.nd2	5
Kc IF_pMT-eGFP_CID Cy2 GFP Cy3_007.nd2	6	Kc IF_pMT-Cap-H2-eGFP_CID Cy2 GFP Cy3_005.nd2	6	3-25-14_Kc IF_Cap-h2-MBM-eGFP_CID Cy2_GFP_Cy5_locali1005.nd2	5	3-25-14_Kc IF_CID Cy2_GFP_Cy5_001.nd2	6	Kc IF_Cid Cy2 and GFP Cy3_Cap-H2-MBMdC23-GFP_ Rep3_set1_003.nd2	5
Kc IF_pMT-eGFP_CID Cy2 GFP Cy3_007.nd2	6	Kc IF_pMT-Cap-H2-eGFP_CID Cy2 GFP Cy3_005.nd2	6	3-27-14_Kc IF_Cap-H2-MBM-eGFP_CID Cy2_GFP_Cy5_001.nd2	5	3-25-14_Kc IF_CID Cy2_GFP_Cy5_007.nd2	6	Kc IF_Cid Cy2 and GFP Cy3_Cap-H2-MBMdC23-GFP_ Rep3_set1_003.nd2	5
Kc IF_pMT-eGFP_CID Cy2 GFP Cy3_007.nd2	6	Kc IF_pMT-Cap-H2-eGFP_CID Cy2 GFP Cy3_005.nd2	6	3-27-14_Kc IF_Cap-H2-MBM-eGFP_CID Cy2_GFP_Cy5_001.nd2	5	3-25-14_Kc IF_CID Cy2_GFP_Cy5_005.nd2	6	Kc IF_Cid Cy2 and GFP Cy3_Cap-H2-MBMdC23-GFP_ Rep3_set1_003.nd2	5
Kc IF_pMT-eGFP_CID Cy2 GFP Cy3_005.nd2	6	Kc IF_pMT-Cap-H2-eGFP_CID Cy2 GFP Cy3_007.nd2	6	Kc IF_pMT-Cap-H2-MBM-eGFP_CID Cy2 GFP Cy3_001.nd2	6	3-25-14_Kc IF_Cap-h2-dC23-eGFP_CID Cy2_GFP_Cy5_locali1002.nd2	6	Kc IF_Cid Cy2 and GFP Cy3_Cap-H2-MBMdC23-GFP_ Rep3_set1_004.nd2	5
Kc IF_pMT-eGFP_CID Cy2 GFP Cy3_005.nd2	6	Kc IF_pMT-Cap-H2-eGFP_CID Cy2 GFP Cy3_006.nd2	6	Kc IF_pMT-Cap-H2-MBM-eGFP_CID Cy2 GFP Cy3_001.nd2	6	3-25-14_Kc IF_CID Cy2_GFP_Cy5_008.nd2	6	Kc IF_Cid Cy2 and GFP Cy3_Cap-H2-MBMdC23-GFP_ Rep3_set2_001.nd2	5
3-27-14_Kc IF_pMT-eGFP_CID Cy2_GFP_Cy5_004.nd2	6	Kc IF_pMT-Cap-H2-eGFP_CID Cy2 GFP Cy3_006.nd2	6	Kc IF_pMT-Cap-H2-MBM-eGFP_CID Cy2 GFP Cy3_001.nd2	6	3-25-14_Kc IF_CID Cy2_GFP_Cy5_007.nd2	6	Kc IF_Cid Cy2 and GFP Cy3_Cap-H2-MBMdC23-GFP_ Rep3_set2_001.nd2	5
3-27-14_Kc IF_pMT-eGFP_CID Cy2_GFP_Cy5_004.nd2	6	Kc IF_pMT-Cap-H2-eGFP_CID Cy2 GFP Cy3_006.nd2	6	Kc IF_pMT-Cap-H2-MBM-eGFP_CID Cy2 GFP Cy3_009.nd2	6	3-25-14_Kc IF_CID Cy2_GFP_Cy5_003.nd2	6	Kc IF_Cid Cy2 and GFP Cy3_Cap-H2-MBMdC23-GFP_ Rep3_set2_002.nd2	5
3-27-14_Kc IF_pMT-eGFP_CID Cy2_GFP_Cy5_005.nd2	6	Kc IF_pMT-Cap-H2-eGFP_CID Cy2 GFP Cy3_006.nd2	6	Kc IF_pMT-Cap-H2-MBM-eGFP_CID Cy2 GFP Cy3_009.nd2	6	3-25-14_Kc IF_CID Cy2_GFP_Cy5_008.nd2	6	Kc IF_Cid Cy2 and GFP Cy3_Cap-H2-MBMdC23-GFP_ Rep3_set2_002.nd2	5
3-27-14_Kc IF_pMT-eGFP_CID Cy2_GFP_Cy5_005.nd2	6	Kc IF_pMT-Cap-H2-eGFP_CID Cy2 GFP Cy3_good locali003.nd2	6	Kc IF_pMT-Cap-H2-MBM-eGFP_CID Cy2 GFP Cy3_009.nd2	6	3-25-14_Kc IF_CID Cy2_GFP_Cy5_006.nd2	6	Kc IF_Cid Cy2 and GFP Cy3_Cap-H2-MBMdC23-GFP_ Rep3_set2_003.nd2	5
3-27-14_Kc IF_pMT-eGFP_CID Cy2_GFP_Cy5_006.nd2	6	Kc IF_pMT-Cap-H2-eGFP_CID Cy2 GFP Cy3_good locali003.nd2	6	Kc IF_pMT-Cap-H2-MBM-eGFP_CID Cy2 GFP Cy3_004.nd2	6	3-25-14_Kc IF_CID Cy2_GFP_Cy5_004.nd2	6	Kc IF_Cid Cy2 and GFP Cy3_Cap-H2-MBMdC23-GFP_ Rep3_set2_004.nd2	5
3-27-14_Kc IF_pMT-eGFP_CID Cy2_GFP_Cy5_006.nd2	6	Kc IF_pMT-Cap-H2-eGFP_CID Cy2 GFP Cy3_008.nd2	6	Kc IF_pMT-Cap-H2-MBM-eGFP_CID Cy2 GFP Cy3_004.nd2	6	3-25-14_Kc IF_CID Cy2_GFP_Cy5_002.nd2	6	Kc IF_Cid Cy2 and GFP Cy3_Cap-H2-MBMdC23-GFP_ Rep3_set2_004.nd2	5
3-27-14_Kc IF_pMT-eGFP_CID Cy2_GFP_Cy5_006.nd2	6	Kc IF_pMT-Cap-H2-eGFP_CID Cy2 GFP Cy3_008.nd2	6	Kc IF_pMT-Cap-H2-MBM-eGFP_CID Cy2 GFP Cy3_004.nd2	6	3-25-14_Kc IF_CID Cy2_GFP_Cy5_004.nd2	6	Kc IF_Cid Cy2 and GFP Cy3_Cap-H2-MBMdC23-GFP_ Rep3_set2_004.nd2	5
3-27-14_Kc IF_pMT-eGFP_CID Cy2_GFP_Cy5_007.nd2	6	Kc IF_pMT-Cap-H2-eGFP_CID Cy2 GFP Cy3_008.nd2	6	Kc IF_pMT-Cap-H2-MBM-eGFP_CID Cy2 GFP Cy3_008.nd2	6	3-25-14_Kc IF_CID Cy2_GFP_Cy5_005.nd2	6	Kc IF_Cid Cy2 and GFP Cy3_Cap-H2-MBMdC23-GFP_ Rep3_set2_005.nd2	5
3-27-14_Kc IF_pMT-eGFP_CID Cy2_GFP_Cy5_007.nd2	6	3-27-14_Kc IF_Cap-H2-eGFP_CID Cy2_GFP_Cy5_004.nd2	6	Kc IF_pMT-Cap-H2-MBM-eGFP_CID Cy2 GFP Cy3_008.nd2	6	3-25-14_Kc IF_CID Cy2_GFP_Cy5_004.nd2	6	Kc IF_Cid Cy2 and GFP Cy3_Cap-H2-MBMdC23-GFP_ Rep3_set2_005.nd2	5
3-27-14_Kc IF_pMT-eGFP_CID Cy2_GFP_Cy5_007.nd2	6	3-27-14_Kc IF_Cap-H2-eGFP_CID Cy2_GFP_Cy5_004.nd2	6	Kc IF_pMT-Cap-H2-MBM-eGFP_CID Cy2 GFP Cy3_005.nd2	6	3-25-14_Kc IF_CID Cy2_GFP_Cy5_002.nd2	6	Kc IF_Cid Cy2 and GFP Cy3_Cap-H2-MBMdC23-GFP_ Rep3_set2_005.nd2	5
3-27-14_Kc IF_pMT-eGFP_CID Cy2_GFP_Cy5_001.nd2	6	3-27-14_Kc IF_Cap-H2-eGFP_CID Cy2_GFP_Cy5_005.nd2	6	Kc IF_pMT-Cap-H2-MBM-eGFP_CID Cy2 GFP Cy3_005.nd2	6	3-25-14_Kc IF_CID Cy2_GFP_Cy5_007.nd2	6	Kc IF_Cid Cy2 and GFP Cy3_Cap-H2-MBMdC23-GFP_ Rep3_set2_006.nd2	5
3-27-14_Kc IF_pMT-eGFP_CID Cy2_GFP_Cy5_002.nd2	6	3-27-14_Kc IF_Cap-H2-eGFP_CID Cy2_GFP_Cy5_005.nd2	6	Kc IF_pMT-Cap-H2-MBM-eGFP_CID Cy2 GFP Cy3_005.nd2	6	3-25-14_Kc IF_CID Cy2_GFP_Cy5_004.nd2	6	Kc IF_Cid Cy2 and GFP Cy3_Cap-H2-MBMdC23-GFP_ Rep3_set2_006.nd2	5
3-27-14_Kc IF_pMT-eGFP_CID Cy2_GFP_Cy5_003.nd2	6	3-27-14_Kc IF_Cap-H2-eGFP_CID Cy2_GFP_Cy5_006.nd2	6	Kc IF_pMT-Cap-H2-MBM-eGFP_CID Cy2 GFP Cy3_005.nd2	6	3-25-14_Kc IF_CID Cy2_GFP_Cy5_008.nd2	6	Kc IF_Cid Cy2 and GFP Cy3_Cap-H2-MBMdC23-GFP_ Rep3_set2_006.nd2	5
3-27-14_Kc IF_pMT-eGFP_CID Cy2_GFP_Cy5_004.nd2	6	3-27-14_Kc IF_Cap-H2-eGFP_CID Cy2_GFP_Cy5_006.nd2	6	Kc IF_pMT-Cap-H2-MBM-eGFP_CID Cy2 GFP Cy3_005.nd2	6	3-25-14_Kc IF_CID Cy2_GFP_Cy5_006.nd2	6	Kc IF_Cid Cy2 and GFP Cy3_Cap-H2-MBMdC23-GFP_ Rep2_set1_001.nd2	5
Kc IF_pMT-eGFP_CID Cy2 GFP Cy3_001.nd2	7	3-27-14_Kc IF_Cap-H2-eGFP_CID Cy2_GFP_Cy5_007.nd2	6	Kc IF_pMT-Cap-H2-MBM-eGFP_CID Cy2 GFP Cy3_005.nd2	6	3-25-14_Kc IF_CID Cy2_GFP_Cy5_001.nd2	6	Kc IF_Cid Cy2 and GFP Cy3_Cap-H2-MBMdC23-GFP_ Rep2_set1_002.nd2	5
Kc IF_pMT-eGFP_CID Cy2 GFP Cy3_006.nd2	7	3-27-14_Kc IF_Cap-H2-eGFP_CID Cy2_GFP_Cy5_007.nd2	6	Kc IF_pMT-Cap-H2-MBM-eGFP_CID Cy2 GFP Cy3_006.nd2	6	3-25-14_Kc IF_CID Cy2_GFP_Cy5_007.nd2	6	Kc IF_Cid Cy2 and GFP Cy3_Cap-H2-MBMdC23-GFP_ Rep2_set1_002.nd2	5
Kc IF_pMT-eGFP_CID Cy2 GFP Cy3_004.nd2	7	3-27-14_Kc IF_Cap-H2-eGFP_CID Cy2_GFP_Cy5_007.nd2	6	Kc IF_pMT-Cap-H2-MBM-eGFP_CID Cy2 GFP Cy3_007.nd2	6	3-25-14_Kc IF_CID Cy2_GFP_Cy5_006.nd2	6	Kc IF_Cid Cy2 and GFP Cy3_Cap-H2-MBMdC23-GFP_ Rep2_set1_002.nd2	5
3-27-14_Kc IF_pMT-eGFP_CID Cy2_GFP_Cy5_006.nd2	7	3-27-14_Kc IF_Cap-H2-eGFP_CID Cy2_GFP_Cy5_008.nd2	6	Kc IF_pMT-Cap-H2-MBM-eGFP_CID Cy2 GFP Cy3_007.nd2	6	3-25-14_Kc IF_Cap-h2-dC23-eGFP_CID Cy2_GFP_Cy5_locali1001.nd2	6	Kc IF_Cid Cy2 and GFP Cy3_Cap-H2-MBMdC23-GFP_ Rep2_set1_002.nd2	5
3-27-14_Kc IF_pMT-eGFP_CID Cy2_GFP_Cy5_008.nd2	7	3-27-14_Kc IF_Cap-H2-eGFP_CID Cy2_GFP_Cy5_008.nd2	6	Kc IF_pMT-Cap-H2-MBM-eGFP_CID Cy2 GFP Cy3_002.nd2	6	3-25-14_Kc IF_CID Cy2_GFP_Cy5_008.nd2	6	Kc IF_Cid Cy2 and GFP Cy3_Cap-H2-MBMdC23-GFP_ Rep2_set1_004.nd2	5
3-27-14_Kc IF_pMT-eGFP_CID Cy2_GFP_Cy5_002.nd2	7	3-27-14_Kc IF_Cap-H2-eGFP_CID Cy2_GFP_Cy5_locali1007.nd2	6	Kc IF_pMT-Cap-H2-MBM-eGFP_CID Cy2 GFP Cy3_002.nd2	6	3-25-14_Kc IF_CID Cy2_GFP_Cy5_006.nd2	6	Kc IF_Cid Cy2 and GFP Cy3_Cap-H2-MBMdC23-GFP_ Rep2_set2_001.nd2	5
Kc IF_pMT-eGFP_CID Cy2 GFP Cy3_006.nd2	8	3-27-14_Kc IF_Cap-H2-eGFP_CID Cy2_GFP_Cy5_locali1007.nd2	6	Kc IF_pMT-Cap-H2-MBM-eGFP_CID Cy2 GFP Cy3_003.nd2	6	Kc IF_pMT-Cap-H2-dC23-eGFP_CID Cy2 GFP Cy3_008.nd2	6	Kc IF_Cid Cy2 and GFP Cy3_Cap-H2-MBMdC23-GFP_ Rep2_set2_003.nd2	5
3-27-14_Kc IF_pMT-eGFP_CID Cy2_GFP_Cy5_005.nd2	8	3-25-14_Kc IF_Cap-h2-eGFP_CID Cy2_GFP_Cy5_locali1006.nd2	6	Kc IF_pMT-Cap-H2-MBM-eGFP_CID Cy2 GFP Cy3_003.nd2	6	Kc IF_pMT-Cap-H2-dC23-eGFP_CID Cy2 GFP Cy3_002.nd2	6	Kc IF_Cid Cy2 and GFP Cy3_Cap-H2-MBMdC23-GFP_ Rep2_set2_003.nd2	5
Kc IF_pMT-eGFP_CID Cy2 GFP Cy3_003.nd2	9	3-25-14_Kc IF_Cap-h2-eGFP_CID Cy2_GFP_Cy5_locali1006.nd2	6	3-27-14_Kc IF_Cap-H2-MBM-eGFP_CID Cy2_GFP_Cy5_002.nd2	6	Kc IF_pMT-Cap-H2-dC23-eGFP_CID Cy2 GFP Cy3_001.nd2	6	Kc IF_Cid Cy2 and GFP Cy3_Cap-H2-MBMdC23-GFP_ Rep2_set2_003.nd2	5
		3-27-14_Kc IF_Cap-H2-eGFP_CID Cy2_GFP_Cy5_002.nd2	6	3-27-14_Kc IF_Cap-H2-MBM-eGFP_CID Cy2_GFP_Cy5_003.nd2	6	Kc IF_pMT-Cap-H2-dC23-eGFP_CID Cy2 GFP Cy3_good locali002.nd2	6	Kc IF_Cid Cy2 and GFP Cy3_Cap-H2-MBMdC23-GFP_ Rep2_set2_004.nd2	5
Total number of cells	Average number of Cid spots	3-27-14_Kc IF_Cap-H2-eGFP_CID Cy2_GFP_Cy5_003.nd2	6	3-27-14_Kc IF_Cap-H2-MBM-eGFP_CID Cy2_GFP_Cy5_004.nd2	6	Kc IF_pMT-Cap-H2-dC23-eGFP_CID Cy2 GFP Cy3_good locali002.nd2	6	Kc IF_Cid Cy2 and GFP Cy3_Cap-H2-MBMdC23-GFP_ Rep2_set2_005.nd2	5
320	3.82812	3-27-14_Kc IF_Cap-H2-eGFP_CID Cy2_GFP_Cy5_003.nd2	6	3-27-14_Kc IF_Cap-H2-MBM-eGFP_CID Cy2_GFP_Cy5_005.nd2	6	Kc IF_pMT-Cap-H2-dC23-eGFP_CID Cy2 GFP Cy3_006.nd2	6	Kc IF_Cid Cy2 and GFP Cy3_Cap-H2-MBMdC23-GFP_ Rep2_set2_006.nd2	5
		3-27-14_Kc IF_Cap-H2-eGFP_CID Cy2_GFP_Cy5_003.nd2	6	3-27-14_Kc IF_Cap-H2-MBM-eGFP_CID Cy2_GFP_Cy5_005.nd2	6	Kc IF_pMT-Cap-H2-dC23-eGFP_CID Cy2 GFP Cy3_009.nd2	6	Kc IF_Cid Cy2 and GFP Cy3_Cap-H2-MBMdC23-GFP_ Rep2_set2_006.nd2	5
		Kc IF_pMT-Cap-H2-eGFP_CID Cy2 GFP Cy3_003.nd2	7	3-27-14_Kc IF_Cap-H2-MBM-eGFP_CID Cy2_GFP_Cy5_005.nd2	6	Kc IF_pMT-Cap-H2-dC23-eGFP_CID Cy2 GFP Cy3_005.nd2	6	Kc IF_Cid Cy2 and GFP Cy3_Cap-H2-MBMdC23-GFP_ Rep2_set2_006.nd2	5
		Kc IF_pMT-Cap-H2-eGFP_CID Cy2 GFP Cy3_003.nd2	7	3-27-14_Kc IF_Cap-H2-MBM-eGFP_CID Cy2_GFP_Cy5_007.nd2	6	Kc IF_pMT-Cap-H2-dC23-eGFP_CID Cy2 GFP Cy3_009.nd2	6	Kc IF_Cid Cy2 and GFP Cy3_Cap-H2-MBMdC23-GFP_ Rep2_set2_007.nd2	5
		Kc IF_pMT-Cap-H2-eGFP_CID Cy2 GFP Cy3_003.nd2	7	3-27-14_Kc IF_Cap-H2-MBM-eGFP_CID Cy2_GFP_Cy5_007.nd2	6	Kc IF_pMT-Cap-H2-dC23-eGFP_CID Cy2 GFP Cy3_003.nd2	6	Kc IF_Cid Cy2 and GFP Cy3_Cap-H2-MBMdC23-GFP_ Rep2_set2_007.nd2	5
		Kc IF_pMT-Cap-H2-eGFP_CID Cy2 GFP Cy3_002.nd2	7	3-27-14_Kc IF_Cap-H2-MBM-eGFP_CID Cy2_GFP_Cy5_007.nd2	6	Kc IF_pMT-Cap-H2-dC23-eGFP_CID Cy2 GFP Cy3_007.nd2	6	Kc IF_Cid Cy2 and GFP Cy3_Cap-H2-MBMdC23-GFP_ Rep2_set2_008.nd2	5
		Kc IF_pMT-Cap-H2-eGFP_CID Cy2 GFP Cy3_002.nd2	7	3-27-14_Kc IF_Cap-H2-MBM-eGFP_CID Cy2_GFP_Cy5_007.nd2	6	Kc IF_pMT-Cap-H2-dC23-eGFP_CID Cy2 GFP Cy3_002.nd2	6	Kc IF_Cid Cy2 and GFP Cy3_Cap-H2-MBMdC23-GFP_ Rep2_set2_008.nd2	5
		Kc IF_pMT-Cap-H2-eGFP_CID Cy2 GFP Cy3_001.nd2	7	3-27-14_Kc IF_Cap-H2-MBM-eGFP_CID Cy2_GFP_Cy5_008.nd2	6	Kc IF_pMT-Cap-H2-dC23-eGFP_CID Cy2 GFP Cy3_009.nd2	6	3-25-14_Kc IF_Cap-h2-MBM-dC23-eGFP_CID Cy2_GFP_Cy5_002.nd2	6
		Kc IF_pMT-Cap-H2-eGFP_CID Cy2 GFP Cy3_006.nd2	7	3-25-14_Kc IF_Cap-h2-MBM-eGFP_CID Cy2_GFP_Cy5_locali1004.nd2	6	Kc IF_pMT-Cap-H2-dC23-eGFP_CID Cy2 GFP Cy3_009.nd2	6	3-25-14_Kc IF_Cap-h2-MBM-dC23-eGFP_CID Cy2_GFP_Cy5_006.nd2	6
		Kc IF_pMT-Cap-H2-eGFP_CID Cy2 GFP Cy3_006.nd2	7	3-25-14_Kc IF_Cap-h2-MBM-eGFP_CID Cy2_GFP_Cy5_locali1004.nd2	6	Kc IF_pMT-Cap-H2-dC23-eGFP_CID Cy2 GFP Cy3_003.nd2	6	3-25-14_Kc IF_Cap-h2-MBM-dC23-eGFP_CID Cy2_GFP_Cy5_001.nd2	6
		Kc IF_pMT-Cap-H2-eGFP_CID Cy2 GFP Cy3_good locali003.nd2	7	Kc IF_pMT-Cap-H2-MBM-eGFP_CID Cy2 GFP Cy3_004.nd2	7	Kc IF_pMT-Cap-H2-dC23-eGFP_CID Cy2 GFP Cy3_007.nd2	6	3-25-14_Kc IF_Cap-h2-MBM-dC23-eGFP_CID Cy2_GFP_Cy5_006.nd2	6
		Kc IF_pMT-Cap-H2-eGFP_CID Cy2 GFP Cy3_008.nd2	7	Kc IF_pMT-Cap-H2-MBM-eGFP_CID Cy2 GFP Cy3_006.nd2	7	Kc IF_pMT-Cap-H2-dC23-eGFP_CID Cy2 GFP Cy3_009.nd2	6	3-25-14_Kc IF_Cap-h2-MBM-dC23-eGFP_CID Cy2_GFP_Cy5_003.nd2	6
		Kc IF_pMT-Cap-H2-eGFP_CID Cy2 GFP Cy3_008.nd2	7	Kc IF_pMT-Cap-H2-MBM-eGFP_CID Cy2 GFP Cy3_002.nd2	7	Kc IF_pMT-Cap-H2-dC23-eGFP_CID Cy2 GFP Cy3_good locali001.nd2	6	3-25-14_Kc IF_Cap-h2-MBM-dC23-eGFP_CID Cy2_GFP_Cy5_006.nd2	6
		Kc IF_pMT-Cap-H2-eGFP_CID Cy2 GFP Cy3_008.nd2	7	Kc IF_pMT-Cap-H2-MBM-eGFP_CID Cy2 GFP Cy3_003.nd2	7	Kc IF_pMT-Cap-H2-dC23-eGFP_CID Cy2 GFP Cy3_009.nd2	6	3-25-14_Kc IF_Cap-h2-MBM-dC23-eGFP_CID Cy2_GFP_Cy5_006.nd2	6
		3-27-14_Kc IF_Cap-H2-eGFP_CID Cy2_GFP_Cy5_005.nd2	7	3-27-14_Kc IF_Cap-H2-MBM-eGFP_CID Cy2_GFP_Cy5_003.nd2	7	Kc IF_pMT-Cap-H2-dC23-eGFP_CID Cy2 GFP Cy3_003.nd2	6	3-25-14_Kc IF_Cap-h2-MBM-dC23-eGFP_CID Cy2_GFP_Cy5_002.nd2	6
		3-27-14_Kc IF_Cap-H2-eGFP_CID Cy2_GFP_Cy5_006.nd2	7	3-27-14_Kc IF_Cap-H2-MBM-eGFP_CID Cy2_GFP_Cy5_008.nd2	7	Kc IF_pMT-Cap-H2-dC23-eGFP_CID Cy2 GFP Cy3_006.nd2	6	3-25-14_Kc IF_Cap-h2-MBM-dC23-eGFP_CID Cy2_GFP_Cy5_003.nd2	6
		3-27-14_Kc IF_Cap-H2-eGFP_CID Cy2_GFP_Cy5_006.nd2	7	3-27-14_Kc IF_Cap-H2-MBM-eGFP_CID Cy2_GFP_Cy5_008.nd2	7	Kc IF_pMT-Cap-H2-dC23-eGFP_CID Cy2 GFP Cy3_002.nd2	6	3-25-14_Kc IF_Cap-h2-MBM-dC23-eGFP_CID Cy2_GFP_Cy5_002.nd2	6
		3-27-14_Kc IF_Cap-H2-eGFP_CID Cy2_GFP_Cy5_007.nd2	7	3-25-14_Kc IF_Cap-h2-MBM-eGFP_CID Cy2_GFP_Cy5_locali1004.nd2	7	Kc IF_pMT-Cap-H2-dC23-eGFP_CID Cy2 GFP Cy3_009.nd2	6	3-25-14_Kc IF_Cap-h2-MBM-dC23-eGFP_CID Cy2_GFP_Cy5_007.nd2	6
		3-25-14_Kc IF_Cap-h2-eGFP_CID Cy2_GFP_Cy5_locali1006.nd2	7	3-25-14_Kc IF_Cap-h2-MBM-eGFP_CID Cy2_GFP_Cy5_locali1004.nd2	7	Kc IF_pMT-Cap-H2-dC23-eGFP_CID Cy2 GFP Cy3_004.nd2	6	3-25-14_Kc IF_Cap-h2-MBM-dC23-eGFP_CID Cy2_GFP_Cy5_003.nd2	6
		3-27-14_Kc IF_Cap-H2-eGFP_CID Cy2_GFP_Cy5_002.nd2	7	3-25-14_Kc IF_Cap-h2-MBM-eGFP_CID Cy2_GFP_Cy5_locali1004.nd2	7	Kc IF_pMT-Cap-H2-dC23-eGFP_CID Cy2 GFP Cy3_004.nd2	6	3-25-14_Kc IF_Cap-h2-MBM-dC23-eGFP_CID Cy2_GFP_Cy5_001.nd2	6
		3-27-14_Kc IF_Cap-H2-eGFP_CID Cy2_GFP_Cy5_002.nd2	7	3-25-14_Kc IF_Cap-h2-MBM-eGFP_CID Cy2_GFP_Cy5_locali1004.nd2	7	Kc IF_Cid Cy2 and GFP Cy3_Cap-H2-dC2-GFP_ Rep3_setting1_007.nd2	7	3-25-14_Kc IF_Cap-h2-MBM-dC23-eGFP_CID Cy2_GFP_Cy5_003.nd2	6
		3-27-14_Kc IF_Cap-H2-eGFP_CID Cy2_GFP_Cy5_003.nd2	7	Kc IF_pMT-Cap-H2-MBM-eGFP_CID Cy2 GFP Cy3_001.nd2	8	Kc IF_Cid Cy2 and GFP Cy3_Cap-H2-dC23-GFP_ Rep3_set2_001.nd2	7	3-25-14_Kc IF_Cap-h2-MBM-dC23-eGFP_CID Cy2_GFP_Cy5_001.nd2	6
		Kc IF_pMT-Cap-H2-eGFP_CID Cy2 GFP Cy3_003.nd2	8	Kc IF_pMT-Cap-H2-MBM-eGFP_CID Cy2 GFP Cy3_001.nd2	8	Kc IF_Cid Cy2 and GFP Cy3_Cap-H2-dC23-GFP_ Rep3_set2_002.nd2	7	3-25-14_Kc IF_Cap-h2-MBM-dC23-eGFP_CID Cy2_GFP_Cy5_006.nd2	6
		Kc IF_pMT-Cap-H2-eGFP_CID Cy2 GFP Cy3_003.nd2	8	Kc IF_pMT-Cap-H2-MBM-eGFP_CID Cy2 GFP Cy3_004.nd2	8	3-25-14_Kc IF_CID Cy2_GFP_Cy5_006.nd2	7	3-25-14_Kc IF_Cap-h2-MBM-dC23-eGFP_CID Cy2_GFP_Cy5_005.nd2	6
		Kc IF_pMT-Cap-H2-eGFP_CID Cy2 GFP Cy3_002.nd2	8	Kc IF_pMT-Cap-H2-MBM-eGFP_CID Cy2 GFP Cy3_004.nd2	8	3-25-14_Kc IF_CID Cy2_GFP_Cy5_001.nd2	7	3-25-14_Kc IF_Cap-h2-MBM-dC23-eGFP_CID Cy2_GFP_Cy5_007.nd2	6
		Kc IF_pMT-Cap-H2-eGFP_CID Cy2 GFP Cy3_002.nd2	8	Kc IF_pMT-Cap-H2-MBM-eGFP_CID Cy2 GFP Cy3_008.nd2	8	3-25-14_Kc IF_CID Cy2_GFP_Cy5_005.nd2	7	3-25-14_Kc IF_Cap-h2-MBM-dC23-eGFP_CID Cy2_GFP_Cy5_004.nd2	6
		Kc IF_pMT-Cap-H2-eGFP_CID Cy2 GFP Cy3_001.nd2	8	Kc IF_pMT-Cap-H2-MBM-eGFP_CID Cy2 GFP Cy3_002.nd2	8	3-25-14_Kc IF_CID Cy2_GFP_Cy5_008.nd2	7	3-25-14_Kc IF_Cap-h2-MBM-dC23-eGFP_CID Cy2_GFP_Cy5_007.nd2	6
		Kc IF_pMT-Cap-H2-eGFP_CID Cy2 GFP Cy3_007.nd2	8	Kc IF_pMT-Cap-H2-MBM-eGFP_CID Cy2 GFP Cy3_003.nd2	8	3-25-14_Kc IF_Cap-h2-dC23-eGFP_CID Cy2_GFP_Cy5_locali1001.nd2	7	3-25-14_Kc IF_Cap-h2-MBM-dC23-eGFP_CID Cy2_GFP_Cy5_008.nd2	6
		Kc IF_pMT-Cap-H2-eGFP_CID Cy2 GFP Cy3_007.nd2	8	Kc IF_pMT-Cap-H2-MBM-eGFP_CID Cy2 GFP Cy3_003.nd2	8	3-25-14_Kc IF_CID Cy2_GFP_Cy5_004.nd2	7	3-25-14_Kc IF_Cap-h2-MBM-dC23-eGFP_CID Cy2_GFP_Cy5_003.nd2	6
		Kc IF_pMT-Cap-H2-eGFP_CID Cy2 GFP Cy3_007.nd2	8	Kc IF_pMT-Cap-H2-MBM-eGFP_CID Cy2 GFP Cy3_003.nd2	8	3-25-14_Kc IF_CID Cy2_GFP_Cy5_007.nd2	7	3-25-14_Kc IF_Cap-h2-MBM-dC23-eGFP_CID Cy2_GFP_Cy5_006.nd2	6
		Kc IF_pMT-Cap-H2-eGFP_CID Cy2 GFP Cy3_good locali003.nd2	8	3-27-14_Kc IF_Cap-H2-MBM-eGFP_CID Cy2_GFP_Cy5_003.nd2	8	3-25-14_Kc IF_CID Cy2_GFP_Cy5_007.nd2	7	3-25-14_Kc IF_Cap-h2-MBM-dC23-eGFP_CID Cy2_GFP_Cy5_002.nd2	6
		Kc IF_pMT-Cap-H2-eGFP_CID Cy2 GFP Cy3_008.nd2	8	3-25-14_Kc IF_Cap-h2-MBM-eGFP_CID Cy2_GFP_Cy5_locali1005.nd2	8	3-25-14_Kc IF_CID Cy2_GFP_Cy5_003.nd2	7	3-25-14_Kc IF_Cap-h2-MBM-dC23-eGFP_CID Cy2_GFP_Cy5_006.nd2	6
		3-27-14_Kc IF_Cap-H2-eGFP_CID Cy2_GFP_Cy5_005.nd2	8	3-27-14_Kc IF_Cap-H2-MBM-eGFP_CID Cy2_GFP_Cy5_001.nd2	8	3-25-14_Kc IF_CID Cy2_GFP_Cy5_001.nd2	7	3-25-14_Kc IF_Cap-h2-MBM-dC23-eGFP_CID Cy2_GFP_Cy5_004.nd2	6
		3-27-14_Kc IF_Cap-H2-eGFP_CID Cy2_GFP_Cy5_006.nd2	8	3-27-14_Kc IF_Cap-H2-MBM-eGFP_CID Cy2_GFP_Cy5_001.nd2	8	3-25-14_Kc IF_CID Cy2_GFP_Cy5_006.nd2	7	3-25-14_Kc IF_Cap-h2-MBM-dC23-eGFP_CID Cy2_GFP_Cy5_003.nd2	6
		3-27-14_Kc IF_Cap-H2-eGFP_CID Cy2_GFP_Cy5_006.nd2	8	Kc IF_pMT-Cap-H2-MBM-eGFP_CID Cy2 GFP Cy3_001.nd2	9	3-25-14_Kc IF_CID Cy2_GFP_Cy5_007.nd2	7	Kc IF_Cid Cy2 and GFP Cy3_Cap-H2-MBMdC23-GFP_ Rep3_set1_003.nd2	6
		3-27-14_Kc IF_Cap-H2-eGFP_CID Cy2_GFP_Cy5_007.nd2	8	Kc IF_pMT-Cap-H2-MBM-eGFP_CID Cy2 GFP Cy3_001.nd2	9	3-25-14_Kc IF_Cap-h2-dC23-eGFP_CID Cy2_GFP_Cy5_locali1002.nd2	7	Kc IF_Cid Cy2 and GFP Cy3_Cap-H2-MBMdC23-GFP_ Rep3_set2_002.nd2	6
		3-27-14_Kc IF_Cap-H2-eGFP_CID Cy2_GFP_Cy5_002.nd2	8	Kc IF_pMT-Cap-H2-MBM-eGFP_CID Cy2 GFP Cy3_001.nd2	9	3-25-14_Kc IF_CID Cy2_GFP_Cy5_007.nd2	7	Kc IF_Cid Cy2 and GFP Cy3_Cap-H2-MBMdC23-GFP_ Rep3_set2_003.nd2	6
		3-27-14_Kc IF_Cap-H2-eGFP_CID Cy2_GFP_Cy5_003.nd2	8	Kc IF_pMT-Cap-H2-MBM-eGFP_CID Cy2 GFP Cy3_004.nd2	9	3-25-14_Kc IF_CID Cy2_GFP_Cy5_002.nd2	7	Kc IF_Cid Cy2 and GFP Cy3_Cap-H2-MBMdC23-GFP_ Rep3_set2_004.nd2	6
		Kc IF_pMT-Cap-H2-eGFP_CID Cy2 GFP Cy3_002.nd2	9	Kc IF_pMT-Cap-H2-MBM-eGFP_CID Cy2 GFP Cy3_004.nd2	9	3-25-14_Kc IF_CID Cy2_GFP_Cy5_006.nd2	7	Kc IF_Cid Cy2 and GFP Cy3_Cap-H2-MBMdC23-GFP_ Rep3_set2_005.nd2	6
		Kc IF_pMT-Cap-H2-eGFP_CID Cy2 GFP Cy3_good locali003.nd2	9	Kc IF_pMT-Cap-H2-MBM-eGFP_CID Cy2 GFP Cy3_006.nd2	9	3-25-14_Kc IF_CID Cy2_GFP_Cy5_006.nd2	7	Kc IF_Cid Cy2 and GFP Cy3_Cap-H2-MBMdC23-GFP_ Rep3_set2_006.nd2	6
		Kc IF_pMT-Cap-H2-eGFP_CID Cy2 GFP Cy3_008.nd2	9	Kc IF_pMT-Cap-H2-MBM-eGFP_CID Cy2 GFP Cy3_003.nd2	9	3-25-14_Kc IF_Cap-h2-dC23-eGFP_CID Cy2_GFP_Cy5_locali1001.nd2	7	Kc IF_Cid Cy2 and GFP Cy3_Cap-H2-MBMdC23-GFP_ Rep2_set1_003.nd2	6
		Kc IF_pMT-Cap-H2-eGFP_CID Cy2 GFP Cy3_008.nd2	9	3-27-14_Kc IF_Cap-H2-MBM-eGFP_CID Cy2_GFP_Cy5_004.nd2	9	3-25-14_Kc IF_CID Cy2_GFP_Cy5_005.nd2	7	Kc IF_Cid Cy2 and GFP Cy3_Cap-H2-MBMdC23-GFP_ Rep2_set1_003.nd2	6
		Kc IF_pMT-Cap-H2-eGFP_CID Cy2 GFP Cy3_008.nd2	9	Kc IF_pMT-Cap-H2-MBM-eGFP_CID Cy2 GFP Cy3_001.nd2	10	3-25-14_Kc IF_CID Cy2_GFP_Cy5_007.nd2	7	Kc IF_Cid Cy2 and GFP Cy3_Cap-H2-MBMdC23-GFP_ Rep2_set1_003.nd2	6
		3-27-14_Kc IF_Cap-H2-eGFP_CID Cy2_GFP_Cy5_008.nd2	9	3-27-14_Kc IF_Cap-H2-MBM-eGFP_CID Cy2_GFP_Cy5_003.nd2	11	Kc IF_pMT-Cap-H2-dC23-eGFP_CID Cy2 GFP Cy3_007.nd2	7	Kc IF_Cid Cy2 and GFP Cy3_Cap-H2-MBMdC23-GFP_ Rep2_set2_004.nd2	6
		3-27-14_Kc IF_Cap-H2-eGFP_CID Cy2_GFP_Cy5_002.nd2	9	3-27-14_Kc IF_Cap-H2-MBM-eGFP_CID Cy2_GFP_Cy5_002.nd2	12	Kc IF_pMT-Cap-H2-dC23-eGFP_CID Cy2 GFP Cy3_004.nd2	7	Kc IF_Cid Cy2 and GFP Cy3_Cap-H2-MBMdC23-GFP_ Rep2_set2_005.nd2	6
		3-27-14_Kc IF_Cap-H2-eGFP_CID Cy2_GFP_Cy5_002.nd2	9	3-25-14_Kc IF_Cap-h2-MBM-eGFP_CID Cy2_GFP_Cy5_locali1004.nd2	12	Kc IF_pMT-Cap-H2-dC23-eGFP_CID Cy2 GFP Cy3_good locali002.nd2	7	Kc IF_Cid Cy2 and GFP Cy3_Cap-H2-MBMdC23-GFP_ Rep2_set2_006.nd2	6
		3-27-14_Kc IF_Cap-H2-eGFP_CID Cy2_GFP_Cy5_003.nd2	9	3-25-14_Kc IF_Cap-h2-MBM-eGFP_CID Cy2_GFP_Cy5_locali1004.nd2	12	Kc IF_pMT-Cap-H2-dC23-eGFP_CID Cy2 GFP Cy3_001.nd2	7	Kc IF_Cid Cy2 and GFP Cy3_Cap-H2-MBMdC23-GFP_ Rep2_set2_007.nd2	6
		Kc IF_pMT-Cap-H2-eGFP_CID Cy2 GFP Cy3_008.nd2	13	3-27-14_Kc IF_Cap-H2-MBM-eGFP_CID Cy2_GFP_Cy5_002.nd2	13	Kc IF_pMT-Cap-H2-dC23-eGFP_CID Cy2 GFP Cy3_004.nd2	7	Kc IF_Cid Cy2 and GFP Cy3_Cap-H2-MBMdC23-GFP_ Rep2_set2_007.nd2	6
						Kc IF_pMT-Cap-H2-dC23-eGFP_CID Cy2 GFP Cy3_006.nd2	7	Kc IF_Cid Cy2 and GFP Cy3_Cap-H2-MBMdC23-GFP_ Rep2_set2_007.nd2	6
		Total number of cells	Average number of Cid spots			Kc IF_pMT-Cap-H2-dC23-eGFP_CID Cy2 GFP Cy3_008.nd2	7	Kc IF_Cid Cy2 and GFP Cy3_Cap-H2-MBMdC23-GFP_ Rep2_set2_008.nd2	6
		370	4.6	Total number of cells	Average number of Cid spots	Kc IF_pMT-Cap-H2-dC23-eGFP_CID Cy2 GFP Cy3_005.nd2	7	Kc IF_Cid Cy2 and GFP Cy3_Cap-H2-MBMdC23-GFP_ Rep2_set2_008.nd2	6
				370	4.28108	Kc IF_pMT-Cap-H2-dC23-eGFP_CID Cy2 GFP Cy3_009.nd2	7	Kc IF_Cid Cy2 and GFP Cy3_Cap-H2-MBMdC23-GFP_ Rep2_set2_008.nd2	6
						Kc IF_pMT-Cap-H2-dC23-eGFP_CID Cy2 GFP Cy3_003.nd2	7	3-25-14_Kc IF_Cap-h2-MBM-dC23-eGFP_CID Cy2_GFP_Cy5_004.nd2	7
						Kc IF_pMT-Cap-H2-dC23-eGFP_CID Cy2 GFP Cy3_004.nd2	7	3-25-14_Kc IF_Cap-h2-MBM-dC23-eGFP_CID Cy2_GFP_Cy5_001.nd2	7
						Kc IF_pMT-Cap-H2-dC23-eGFP_CID Cy2 GFP Cy3_008.nd2	7	3-25-14_Kc IF_Cap-h2-MBM-dC23-eGFP_CID Cy2_GFP_Cy5_003.nd2	7
						Kc IF_pMT-Cap-H2-dC23-eGFP_CID Cy2 GFP Cy3_001.nd2	7	3-25-14_Kc IF_Cap-h2-MBM-dC23-eGFP_CID Cy2_GFP_Cy5_002.nd2	7
						Kc IF_pMT-Cap-H2-dC23-eGFP_CID Cy2 GFP Cy3_009.nd2	7	3-25-14_Kc IF_Cap-h2-MBM-dC23-eGFP_CID Cy2_GFP_Cy5_002.nd2	7
						Kc IF_pMT-Cap-H2-dC23-eGFP_CID Cy2 GFP Cy3_003.nd2	7	3-25-14_Kc IF_Cap-h2-MBM-dC23-eGFP_CID Cy2_GFP_Cy5_007.nd2	7
						Kc IF_Cid Cy2 and GFP Cy3_Cap-H2-dC2-GFP_ Rep3_setting1_001.nd2	8	3-25-14_Kc IF_Cap-h2-MBM-dC23-eGFP_CID Cy2_GFP_Cy5_003.nd2	7
						3-25-14_Kc IF_CID Cy2_GFP_Cy5_002.nd2	8	3-25-14_Kc IF_Cap-h2-MBM-dC23-eGFP_CID Cy2_GFP_Cy5_006.nd2	7
						3-25-14_Kc IF_CID Cy2_GFP_Cy5_002.nd2	8	3-25-14_Kc IF_Cap-h2-MBM-dC23-eGFP_CID Cy2_GFP_Cy5_003.nd2	7
						3-25-14_Kc IF_CID Cy2_GFP_Cy5_008.nd2	8	3-25-14_Kc IF_Cap-h2-MBM-dC23-eGFP_CID Cy2_GFP_Cy5_004.nd2	7
						3-25-14_Kc IF_CID Cy2_GFP_Cy5_005.nd2	8	3-25-14_Kc IF_Cap-h2-MBM-dC23-eGFP_CID Cy2_GFP_Cy5_002.nd2	7
						3-25-14_Kc IF_CID Cy2_GFP_Cy5_005.nd2	8	3-25-14_Kc IF_Cap-h2-MBM-dC23-eGFP_CID Cy2_GFP_Cy5_008.nd2	7
						3-25-14_Kc IF_CID Cy2_GFP_Cy5_007.nd2	8	3-25-14_Kc IF_Cap-h2-MBM-dC23-eGFP_CID Cy2_GFP_Cy5_008.nd2	7
						3-25-14_Kc IF_CID Cy2_GFP_Cy5_003.nd2	8	3-25-14_Kc IF_Cap-h2-MBM-dC23-eGFP_CID Cy2_GFP_Cy5_003.nd2	7
						3-25-14_Kc IF_CID Cy2_GFP_Cy5_001.nd2	8	3-25-14_Kc IF_Cap-h2-MBM-dC23-eGFP_CID Cy2_GFP_Cy5_003.nd2	7
						Kc IF_pMT-Cap-H2-dC23-eGFP_CID Cy2 GFP Cy3_003.nd2	8	3-25-14_Kc IF_Cap-h2-MBdC23-eGFP_CID Cy2_GFP_Cy5_locali1003.nd2	7
						Kc IF_pMT-Cap-H2-dC23-eGFP_CID Cy2 GFP Cy3_009.nd2	8	3-25-14_Kc IF_Cap-h2-MBM-dC23-eGFP_CID Cy2_GFP_Cy5_002.nd2	7
						Kc IF_pMT-Cap-H2-dC23-eGFP_CID Cy2 GFP Cy3_003.nd2	8	3-25-14_Kc IF_Cap-h2-MBM-dC23-eGFP_CID Cy2_GFP_Cy5_008.nd2	7
						Kc IF_pMT-Cap-H2-dC23-eGFP_CID Cy2 GFP Cy3_006.nd2	8	3-25-14_Kc IF_Cap-h2-MBM-dC23-eGFP_CID Cy2_GFP_Cy5_002.nd2	7
						Kc IF_pMT-Cap-H2-dC23-eGFP_CID Cy2 GFP Cy3_004.nd2	8	3-25-14_Kc IF_Cap-h2-MBM-dC23-eGFP_CID Cy2_GFP_Cy5_001.nd2	7
						Kc IF_pMT-Cap-H2-dC23-eGFP_CID Cy2 GFP Cy3_005.nd2	8	Kc IF_Cid Cy2 and GFP Cy3_Cap-H2-MBMdC23-GFP_ Rep3_set1_002.nd2	7
						Kc IF_pMT-Cap-H2-dC23-eGFP_CID Cy2 GFP Cy3_005.nd2	8	Kc IF_Cid Cy2 and GFP Cy3_Cap-H2-MBMdC23-GFP_ Rep3_set1_004.nd2	7
						Kc IF_pMT-Cap-H2-dC23-eGFP_CID Cy2 GFP Cy3_005.nd2	8	Kc IF_Cid Cy2 and GFP Cy3_Cap-H2-MBMdC23-GFP_ Rep2_set1_004.nd2	7
						Kc IF_pMT-Cap-H2-dC23-eGFP_CID Cy2 GFP Cy3_009.nd2	8	Kc IF_Cid Cy2 and GFP Cy3_Cap-H2-MBMdC23-GFP_ Rep2_set2_005.nd2	7
						Kc IF_pMT-Cap-H2-dC23-eGFP_CID Cy2 GFP Cy3_004.nd2	8	3-25-14_Kc IF_Cap-h2-MBM-dC23-eGFP_CID Cy2_GFP_Cy5_004.nd2	8
						Kc IF_pMT-Cap-H2-dC23-eGFP_CID Cy2 GFP Cy3_009.nd2	8	3-25-14_Kc IF_Cap-h2-MBM-dC23-eGFP_CID Cy2_GFP_Cy5_005.nd2	8
						Kc IF_pMT-Cap-H2-dC23-eGFP_CID Cy2 GFP Cy3_003.nd2	8	3-25-14_Kc IF_Cap-h2-MBM-dC23-eGFP_CID Cy2_GFP_Cy5_008.nd2	8
						Kc IF_pMT-Cap-H2-dC23-eGFP_CID Cy2 GFP Cy3_009.nd2	8	3-25-14_Kc IF_Cap-h2-MBM-dC23-eGFP_CID Cy2_GFP_Cy5_003.nd2	8
						Kc IF_Cid Cy2 and GFP Cy3_Cap-H2-dC2-GFP_ Rep3_setting1_001.nd2	9	3-25-14_Kc IF_Cap-h2-MBM-dC23-eGFP_CID Cy2_GFP_Cy5_008.nd2	8
						3-25-14_Kc IF_CID Cy2_GFP_Cy5_008.nd2	9	3-25-14_Kc IF_Cap-h2-MBM-dC23-eGFP_CID Cy2_GFP_Cy5_locali1.nd2	8
						3-25-14_Kc IF_CID Cy2_GFP_Cy5_003.nd2	9	3-25-14_Kc IF_Cap-h2-MBdC23-eGFP_CID Cy2_GFP_Cy5_locali1003.nd2	8
						3-25-14_Kc IF_CID Cy2_GFP_Cy5_007.nd2	9	3-25-14_Kc IF_Cap-h2-MBM-dC23-eGFP_CID Cy2_GFP_Cy5_008.nd2	9
						Kc IF_pMT-Cap-H2-dC23-eGFP_CID Cy2 GFP Cy3_003.nd2	9	3-25-14_Kc IF_Cap-h2-MBM-dC23-eGFP_CID Cy2_GFP_Cy5_005.nd2	9
						Kc IF_pMT-Cap-H2-dC23-eGFP_CID Cy2 GFP Cy3_005.nd2	9	3-25-14_Kc IF_Cap-h2-MBM-dC23-eGFP_CID Cy2_GFP_Cy5_005.nd2	9
						Kc IF_pMT-Cap-H2-dC23-eGFP_CID Cy2 GFP Cy3_009.nd2	9	3-25-14_Kc IF_Cap-h2-MBM-dC23-eGFP_CID Cy2_GFP_Cy5_003.nd2	10
						3-25-14_Kc IF_CID Cy2_GFP_Cy5_006.nd2	10	3-25-14_Kc IF_Cap-h2-MBM-dC23-eGFP_CID Cy2_GFP_Cy5_007.nd2	10
						3-25-14_Kc IF_CID Cy2_GFP_Cy5_002.nd2	10	3-25-14_Kc IF_Cap-h2-MBM-dC23-eGFP_CID Cy2_GFP_Cy5_005.nd2	10
						Kc IF_pMT-Cap-H2-dC23-eGFP_CID Cy2 GFP Cy3_008.nd2	10	3-25-14_Kc IF_Cap-h2-MBM-dC23-eGFP_CID Cy2_GFP_Cy5_locali1.nd2	10
						Kc IF_pMT-Cap-H2-dC23-eGFP_CID Cy2 GFP Cy3_006.nd2	10	Kc IF_Cid Cy2 and GFP Cy3_Cap-H2-MBMdC23-GFP_ Rep2_set1_002.nd2	10
						3-25-14_Kc IF_CID Cy2_GFP_Cy5_001.nd2	11	3-25-14_Kc IF_Cap-h2-MBM-dC23-eGFP_CID Cy2_GFP_Cy5_003.nd2	11
						3-25-14_Kc IF_CID Cy2_GFP_Cy5_007.nd2	11	3-25-14_Kc IF_Cap-h2-MBM-dC23-eGFP_CID Cy2_GFP_Cy5_004.nd2	11
						Kc IF_pMT-Cap-H2-dC23-eGFP_CID Cy2 GFP Cy3_006.nd2	12	3-25-14_Kc IF_Cap-h2-MBM-dC23-eGFP_CID Cy2_GFP_Cy5_004.nd2	12
						3-25-14_Kc IF_CID Cy2_GFP_Cy5_007.nd2	13	3-25-14_Kc IF_Cap-h2-MBM-dC23-eGFP_CID Cy2_GFP_Cy5_006.nd2	12
						Kc IF_pMT-Cap-H2-dC23-eGFP_CID Cy2 GFP Cy3_006.nd2	13	Kc IF_Cid Cy2 and GFP Cy3_Cap-H2-MBMdC23-GFP_ Rep2_set1_002.nd2	12
						Total number of cells	Average number of Cid spots	Total number of cells	Average number of Cid spots
						417	4.94258	417	4.41388

## Sheet: Figure 6F pairing counts
pMT-EGFP 2L (green)		pMT-EGFP X (red)		pMT-Cap-H2-EGFP 2L (green)		pMT-Cap-H2-EGFP X (red)		Cap-H2-MBM-EGFP 2L (green)		pMT-Cap-H2-MBM-EGFP X (red)		pMT-Cap-H2-dC23-EGFP 2L (green)		pMT-Cap-H2-dC23-EGFP X (red)		pMT-Cap-H2-MBM-dC23-EGFP 2L (green)		pMT-Cap-H2-MBM-dC23-EGFP X (red)
Source Image	# of FISH spots	Source Image	# of FISH spots	Source Image	# of FISH spots	Source Image	# of FISH spots	Source Image	# of FISH spots	Source Image	# of FISH spots	Source Image	# of FISH spots	Source Image	# of FISH spots	Source Image	# of FISH spots	Source Image	# of FISH spots
Kc cell FISH_2L 488 and X Cy3_pMT-eGFP.002.nd2	1	Kc cell FISH_2L 488 and X Cy3_pMT-eGFP.005.nd2	1	Kc cell FISH_2L 488 and X Cy3_pMT-Cap-H2-eGFP.011.nd2	2	Kc cell FISH_2L 488 and X Cy3_pMT-Cap-H2-eGFP.010.nd2	2	Kc cell FISH_2L 488 and X Cy3_pMT-Cap-H2-MBM-eGFP.003.nd2	2	Kc cell FISH_2L 488 and X Cy3_pMT-Cap-H2-MBM-eGFP.007.nd2	1	Kc cell FISH_2L 488 and X Cy3_pMT-Cap-H2-dC23-eGFP.003.nd2	2	Kc cell FISH_2L 488 and X Cy3_pMT-Cap-H2-dC23-eGFP.006.nd2	3	Kc FISH_X and 2L_CapH2-MBM-dC23-eGFP_100x_512setting2_003.nd2	1	Kc FISH_X and 2L_CapH2-MBM-dC23-eGFP_100x_512setting2_007.nd2	2
Kc cell FISH_2L 488 and X Cy3_pMT-eGFP.001.nd2	1	Kc cell FISH_2L 488 and X Cy3_pMT-eGFP.001.nd2	1	Kc cell FISH_2L 488 and X Cy3_pMT-Cap-H2-eGFP.009.nd2	2	Kc cell FISH_2L 488 and X Cy3_pMT-Cap-H2-eGFP.010.nd2	1	Kc cell FISH_2L 488 and X Cy3_pMT-Cap-H2-MBM-eGFP.004.nd2	1	Kc cell FISH_2L 488 and X Cy3_pMT-Cap-H2-MBM-eGFP.003.nd2	2	Kc cell FISH_2L 488 and X Cy3_pMT-Cap-H2-dC23-eGFP.004.nd2	2	Kc cell FISH_2L 488 and X Cy3_pMT-Cap-H2-dC23-eGFP.002.nd2	1	Kc FISH_X and 2L_CapH2-MBM-dC23-eGFP_100x_512setting2_005.nd2	2	Kc FISH_X and 2L_CapH2-MBM-dC23-eGFP_100x_512setting2_007.nd2	2
Kc cell FISH_2L 488 and X Cy3_pMT-eGFP.005.nd2	2	Kc cell FISH_2L 488 and X Cy3_pMT-eGFP.007.nd2	1	Kc cell FISH_2L 488 and X Cy3_pMT-Cap-H2-eGFP.014.nd2	4	Kc cell FISH_2L 488 and X Cy3_pMT-Cap-H2-eGFP.011.nd2	1	Kc cell FISH_2L 488 and X Cy3_pMT-Cap-H2-MBM-eGFP.004.nd2	1	Kc cell FISH_2L 488 and X Cy3_pMT-Cap-H2-MBM-eGFP.003.nd2	1	Kc cell FISH_2L 488 and X Cy3_pMT-Cap-H2-dC23-eGFP.002.nd2	3	Kc cell FISH_2L 488 and X Cy3_pMT-Cap-H2-dC23-eGFP.003.nd2	1	Kc FISH_X and 2L_CapH2-MBM-dC23-eGFP_100x_512setting2_005.nd2	1	Kc FISH_X and 2L_CapH2-MBM-dC23-eGFP_100x_512setting2_003.nd2	1
Kc cell FISH_2L 488 and X Cy3_pMT-eGFP.004.nd2	1	Kc cell FISH_2L 488 and X Cy3_pMT-eGFP.004.nd2	1	Kc cell FISH_2L 488 and X Cy3_pMT-Cap-H2-eGFP.011.nd2	2	Kc cell FISH_2L 488 and X Cy3_pMT-Cap-H2-eGFP.011.nd2	2	Kc cell FISH_2L 488 and X Cy3_pMT-Cap-H2-MBM-eGFP.002.nd2	2	Kc cell FISH_2L 488 and X Cy3_pMT-Cap-H2-MBM-eGFP.002.nd2	2	Kc cell FISH_2L 488 and X Cy3_pMT-Cap-H2-dC23-eGFP.006.nd2	1	Kc cell FISH_2L 488 and X Cy3_pMT-Cap-H2-dC23-eGFP.007.nd2	1	Kc FISH_X and 2L_CapH2-MBM-dC23-eGFP_100x_512setting2_002.nd2	2	Kc FISH_X and 2L_CapH2-MBM-dC23-eGFP_100x_512setting2_001.nd2	1
Kc cell FISH_2L 488 and X Cy3_pMT-eGFP.007.nd2	1	Kc cell FISH_2L 488 and X Cy3_pMT-eGFP.006.nd2	1	Kc cell FISH_2L 488 and X Cy3_pMT-Cap-H2-eGFP.013.nd2	2	Kc cell FISH_2L 488 and X Cy3_pMT-Cap-H2-eGFP.010.nd2	1	Kc cell FISH_2L 488 and X Cy3_pMT-Cap-H2-MBM-eGFP.003.nd2	1	Kc cell FISH_2L 488 and X Cy3_pMT-Cap-H2-MBM-eGFP.005.nd2	1	Kc cell FISH_2L 488 and X Cy3_pMT-Cap-H2-dC23-eGFP.005.nd2	1	Kc cell FISH_2L 488 and X Cy3_pMT-Cap-H2-dC23-eGFP.002.nd2	1	Kc FISH_X and 2L_CapH2-MBM-dC23-eGFP_100x_512setting2_003.nd2	1	Kc FISH_X and 2L_CapH2-MBM-dC23-eGFP_100x_512setting2_007.nd2	3
Kc cell FISH_2L 488 and X Cy3_pMT-eGFP.003.nd2	1	Kc cell FISH_2L 488 and X Cy3_pMT-eGFP.006.nd2	1	Kc cell FISH_2L 488 and X Cy3_pMT-Cap-H2-eGFP.010.nd2	1	Kc cell FISH_2L 488 and X Cy3_pMT-Cap-H2-eGFP.012.nd2	1	Kc cell FISH_2L 488 and X Cy3_pMT-Cap-H2-MBM-eGFP.003.nd2	1	Kc cell FISH_2L 488 and X Cy3_pMT-Cap-H2-MBM-eGFP.007.nd2	1	Kc cell FISH_2L 488 and X Cy3_pMT-Cap-H2-dC23-eGFP.001.nd2	1	Kc cell FISH_2L 488 and X Cy3_pMT-Cap-H2-dC23-eGFP.003.nd2	1	Kc FISH_X and 2L_CapH2-MBM-dC23-eGFP_100x_512setting2_001.nd2	2	Kc FISH_X and 2L_CapH2-MBM-dC23-eGFP_100x_512setting2_005.nd2	3
Kc cell FISH_2L 488 and X Cy3_pMT-eGFP.007.nd2	1	Kc cell FISH_2L 488 and X Cy3_pMT-eGFP.005.nd2	1	Kc cell FISH_2L 488 and X Cy3_pMT-Cap-H2-eGFP.014.nd2	1	Kc cell FISH_2L 488 and X Cy3_pMT-Cap-H2-eGFP.011.nd2	1	Kc cell FISH_2L 488 and X Cy3_pMT-Cap-H2-MBM-eGFP.004.nd2	1	Kc cell FISH_2L 488 and X Cy3_pMT-Cap-H2-MBM-eGFP.006.nd2	2	Kc cell FISH_2L 488 and X Cy3_pMT-Cap-H2-dC23-eGFP.001.nd2	1	Kc cell FISH_2L 488 and X Cy3_pMT-Cap-H2-dC23-eGFP.002.nd2	1	Kc FISH_X and 2L_CapH2-MBM-dC23-eGFP_100x_512setting2_007.nd2	1	Kc FISH_X and 2L_CapH2-MBM-dC23-eGFP_100x_512setting2_001.nd2	3
Kc cell FISH_2L 488 and X Cy3_pMT-eGFP.001.nd2	2	Kc cell FISH_2L 488 and X Cy3_pMT-eGFP.006.nd2	1	Kc cell FISH_2L 488 and X Cy3_pMT-Cap-H2-eGFP.009.nd2	2	Kc cell FISH_2L 488 and X Cy3_pMT-Cap-H2-eGFP.009.nd2	2	Kc cell FISH_2L 488 and X Cy3_pMT-Cap-H2-MBM-eGFP.007.nd2	1	Kc cell FISH_2L 488 and X Cy3_pMT-Cap-H2-MBM-eGFP.005.nd2	2	Kc cell FISH_2L 488 and X Cy3_pMT-Cap-H2-dC23-eGFP.005.nd2	2	Kc cell FISH_2L 488 and X Cy3_pMT-Cap-H2-dC23-eGFP.002.nd2	1	Kc FISH_X and 2L_CapH2-MBM-dC23-eGFP_100x_512setting2_004.nd2	1	Kc FISH_X and 2L_CapH2-MBM-dC23-eGFP_100x_512setting2_002.nd2	1
Kc cell FISH_2L 488 and X Cy3_pMT-eGFP.007.nd2	1	Kc cell FISH_2L 488 and X Cy3_pMT-eGFP.004.nd2	1	Kc cell FISH_2L 488 and X Cy3_pMT-Cap-H2-eGFP.010.nd2	2	Kc cell FISH_2L 488 and X Cy3_pMT-Cap-H2-eGFP.009.nd2	2	Kc cell FISH_2L 488 and X Cy3_pMT-Cap-H2-MBM-eGFP.003.nd2	3	Kc cell FISH_2L 488 and X Cy3_pMT-Cap-H2-MBM-eGFP.007.nd2	2	Kc cell FISH_2L 488 and X Cy3_pMT-Cap-H2-dC23-eGFP.002.nd2	1	Kc cell FISH_2L 488 and X Cy3_pMT-Cap-H2-dC23-eGFP.001.nd2	1	Kc FISH_X and 2L_CapH2-MBM-dC23-eGFP_100x_512setting2_006.nd2	2	Kc FISH_X and 2L_CapH2-MBM-dC23-eGFP_100x_512setting2_001.nd2	2
Kc cell FISH_2L 488 and X Cy3_pMT-eGFP.002.nd2	1	Kc cell FISH_2L 488 and X Cy3_pMT-eGFP.005.nd2	1	Kc cell FISH_2L 488 and X Cy3_pMT-Cap-H2-eGFP.008.nd2	1	Kc cell FISH_2L 488 and X Cy3_pMT-Cap-H2-eGFP.013.nd2	1	Kc cell FISH_2L 488 and X Cy3_pMT-Cap-H2-MBM-eGFP.005.nd2	1	Kc cell FISH_2L 488 and X Cy3_pMT-Cap-H2-MBM-eGFP.003.nd2	2	Kc cell FISH_2L 488 and X Cy3_pMT-Cap-H2-dC23-eGFP.007.nd2	2	Kc cell FISH_2L 488 and X Cy3_pMT-Cap-H2-dC23-eGFP.002.nd2	2	Kc FISH_X and 2L_CapH2-MBM-dC23-eGFP_100x_512setting2_004.nd2	1	Kc FISH_X and 2L_CapH2-MBM-dC23-eGFP_100x_512setting2_007.nd2	1
Kc cell FISH_2L 488 and X Cy3_pMT-eGFP.004.nd2	1	Kc cell FISH_2L 488 and X Cy3_pMT-eGFP.001.nd2	1	Kc cell FISH_2L 488 and X Cy3_pMT-Cap-H2-eGFP.008.nd2	2	Kc cell FISH_2L 488 and X Cy3_pMT-Cap-H2-eGFP.009.nd2	1	Kc cell FISH_2L 488 and X Cy3_pMT-Cap-H2-MBM-eGFP.007.nd2	1	Kc cell FISH_2L 488 and X Cy3_pMT-Cap-H2-MBM-eGFP.003.nd2	1	Kc cell FISH_2L 488 and X Cy3_pMT-Cap-H2-dC23-eGFP.002.nd2	1	Kc cell FISH_2L 488 and X Cy3_pMT-Cap-H2-dC23-eGFP.005.nd2	1	Kc FISH_X and 2L_CapH2-MBM-dC23-eGFP_100x_512setting2_003.nd2	1	Kc FISH_X and 2L_CapH2-MBM-dC23-eGFP_100x_512setting2_002.nd2	1
Kc cell FISH_2L 488 and X Cy3_pMT-eGFP.002.nd2	1	Kc cell FISH_2L 488 and X Cy3_pMT-eGFP.004.nd2	1	Kc cell FISH_2L 488 and X Cy3_pMT-Cap-H2-eGFP.010.nd2	1	Kc cell FISH_2L 488 and X Cy3_pMT-Cap-H2-eGFP.010.nd2	2	Kc cell FISH_2L 488 and X Cy3_pMT-Cap-H2-MBM-eGFP.003.nd2	1	Kc cell FISH_2L 488 and X Cy3_pMT-Cap-H2-MBM-eGFP.003.nd2	2	Kc cell FISH_2L 488 and X Cy3_pMT-Cap-H2-dC23-eGFP.006.nd2	2	Kc cell FISH_2L 488 and X Cy3_pMT-Cap-H2-dC23-eGFP.002.nd2	3	Kc FISH_X and 2L_CapH2-MBM-dC23-eGFP_100x_512setting2_006.nd2	2	Kc FISH_X and 2L_CapH2-MBM-dC23-eGFP_100x_512setting2_007.nd2	1
Kc cell FISH_2L 488 and X Cy3_pMT-eGFP.006.nd2	2	Kc cell FISH_2L 488 and X Cy3_pMT-eGFP.002.nd2	1	Kc cell FISH_2L 488 and X Cy3_pMT-Cap-H2-eGFP.010.nd2	2	Kc cell FISH_2L 488 and X Cy3_pMT-Cap-H2-eGFP.011.nd2	2	Kc cell FISH_2L 488 and X Cy3_pMT-Cap-H2-MBM-eGFP.006.nd2	2	Kc cell FISH_2L 488 and X Cy3_pMT-Cap-H2-MBM-eGFP.006.nd2	2	Kc cell FISH_2L 488 and X Cy3_pMT-Cap-H2-dC23-eGFP.001.nd2	1	Kc cell FISH_2L 488 and X Cy3_pMT-Cap-H2-dC23-eGFP.005.nd2	2	Kc FISH_X and 2L_CapH2-MBM-dC23-eGFP_100x_512setting2_002.nd2	1	Kc FISH_X and 2L_CapH2-MBM-dC23-eGFP_100x_512setting2_003.nd2	1
Kc cell FISH_2L 488 and X Cy3_pMT-eGFP.006.nd2	1	Kc cell FISH_2L 488 and X Cy3_pMT-eGFP.005.nd2	1	Kc cell FISH_2L 488 and X Cy3_pMT-Cap-H2-eGFP.013.nd2	2	Kc cell FISH_2L 488 and X Cy3_pMT-Cap-H2-eGFP.009.nd2	1	Kc cell FISH_2L 488 and X Cy3_pMT-Cap-H2-MBM-eGFP.006.nd2	1	Kc cell FISH_2L 488 and X Cy3_pMT-Cap-H2-MBM-eGFP.006.nd2	1	Kc cell FISH_2L 488 and X Cy3_pMT-Cap-H2-dC23-eGFP.005.nd2	1	Kc cell FISH_2L 488 and X Cy3_pMT-Cap-H2-dC23-eGFP.006.nd2	3	Kc FISH_X and 2L_CapH2-MBM-dC23-eGFP_100x_512setting2_002.nd2	2	Kc FISH_X and 2L_CapH2-MBM-dC23-eGFP_100x_512setting2_003.nd2	1
Kc cell FISH_2L 488 and X Cy3_pMT-eGFP.002.nd2	1	Kc cell FISH_2L 488 and X Cy3_pMT-eGFP.005.nd2	2	Kc cell FISH_2L 488 and X Cy3_pMT-Cap-H2-eGFP.009.nd2	2	Kc cell FISH_2L 488 and X Cy3_pMT-Cap-H2-eGFP.011.nd2	1	Kc cell FISH_2L 488 and X Cy3_pMT-Cap-H2-MBM-eGFP.002.nd2	1	Kc cell FISH_2L 488 and X Cy3_pMT-Cap-H2-MBM-eGFP.001.nd2	2	Kc cell FISH_2L 488 and X Cy3_pMT-Cap-H2-dC23-eGFP.005.nd2	2	Kc cell FISH_2L 488 and X Cy3_pMT-Cap-H2-dC23-eGFP.003.nd2	3	Kc FISH_X and 2L_CapH2-MBM-dC23-eGFP_100x_512setting2_003.nd2	1	Kc FISH_X and 2L_CapH2-MBM-dC23-eGFP_100x_512setting2_001.nd2	1
Kc cell FISH_2L 488 and X Cy3_pMT-eGFP.003.nd2	1	Kc cell FISH_2L 488 and X Cy3_pMT-eGFP.007.nd2	1	Kc cell FISH_2L 488 and X Cy3_pMT-Cap-H2-eGFP.009.nd2	1	Kc cell FISH_2L 488 and X Cy3_pMT-Cap-H2-eGFP.008.nd2	2	Kc cell FISH_2L 488 and X Cy3_pMT-Cap-H2-MBM-eGFP.003.nd2	1	Kc cell FISH_2L 488 and X Cy3_pMT-Cap-H2-MBM-eGFP.001.nd2	2	Kc cell FISH_2L 488 and X Cy3_pMT-Cap-H2-dC23-eGFP.004.nd2	2	Kc cell FISH_2L 488 and X Cy3_pMT-Cap-H2-dC23-eGFP.005.nd2	2	Kc FISH_X and 2L_CapH2-MBM-dC23-eGFP_100x_512setting2_004.nd2	1	Kc FISH_X and 2L_CapH2-MBM-dC23-eGFP_100x_512setting2_007.nd2	1
Kc cell FISH_2L 488 and X Cy3_pMT-eGFP.005.nd2	1	Kc cell FISH_2L 488 and X Cy3_pMT-eGFP.001.nd2	1	Kc cell FISH_2L 488 and X Cy3_pMT-Cap-H2-eGFP.011.nd2	4	Kc cell FISH_2L 488 and X Cy3_pMT-Cap-H2-eGFP.008.nd2	2	Kc cell FISH_2L 488 and X Cy3_pMT-Cap-H2-MBM-eGFP.004.nd2	1	Kc cell FISH_2L 488 and X Cy3_pMT-Cap-H2-MBM-eGFP.004.nd2	3	Kc cell FISH_2L 488 and X Cy3_pMT-Cap-H2-dC23-eGFP.005.nd2	2	Kc cell FISH_2L 488 and X Cy3_pMT-Cap-H2-dC23-eGFP.002.nd2	2	Kc FISH_X and 2L_CapH2-MBM-dC23-eGFP_100x_512setting2_007.nd2	3	Kc FISH_X and 2L_CapH2-MBM-dC23-eGFP_100x_512setting2_001.nd2	1
Kc cell FISH_2L 488 and X Cy3_pMT-eGFP.005.nd2	1	Kc cell FISH_2L 488 and X Cy3_pMT-eGFP.004.nd2	1	Kc cell FISH_2L 488 and X Cy3_pMT-Cap-H2-eGFP.013.nd2	4	Kc cell FISH_2L 488 and X Cy3_pMT-Cap-H2-eGFP.014.nd2	4	Kc cell FISH_2L 488 and X Cy3_pMT-Cap-H2-MBM-eGFP.002.nd2	2	Kc cell FISH_2L 488 and X Cy3_pMT-Cap-H2-MBM-eGFP.001.nd2	2	Kc cell FISH_2L 488 and X Cy3_pMT-Cap-H2-dC23-eGFP.003.nd2	2	Kc cell FISH_2L 488 and X Cy3_pMT-Cap-H2-dC23-eGFP.005.nd2	2	Kc FISH_X and 2L_CapH2-MBM-dC23-eGFP_100x_512setting2_004.nd2	1	Kc FISH_X and 2L_CapH2-MBM-dC23-eGFP_100x_512setting2_002.nd2	2
Kc cell FISH_2L 488 and X Cy3_pMT-eGFP.006.nd2	1	Kc cell FISH_2L 488 and X Cy3_pMT-eGFP.007.nd2	2	Kc cell FISH_2L 488 and X Cy3_pMT-Cap-H2-eGFP.008.nd2	3	Kc cell FISH_2L 488 and X Cy3_pMT-Cap-H2-eGFP.013.nd2	4	Kc cell FISH_2L 488 and X Cy3_pMT-Cap-H2-MBM-eGFP.007.nd2	2	Kc cell FISH_2L 488 and X Cy3_pMT-Cap-H2-MBM-eGFP.003.nd2	1	Kc cell FISH_2L 488 and X Cy3_pMT-Cap-H2-dC23-eGFP.007.nd2	3	Kc cell FISH_2L 488 and X Cy3_pMT-Cap-H2-dC23-eGFP.002.nd2	2	Kc FISH_X and 2L_CapH2-MBM-dC23-eGFP_100x_512setting2_005.nd2	1	Kc FISH_X and 2L_CapH2-MBM-dC23-eGFP_100x_512setting2_004.nd2	1
Kc cell FISH_2L 488 and X Cy3_pMT-eGFP.004.nd2	2	Kc cell FISH_2L 488 and X Cy3_pMT-eGFP.001.nd2	1	Kc cell FISH_2L 488 and X Cy3_pMT-Cap-H2-eGFP.008.nd2	2	Kc cell FISH_2L 488 and X Cy3_pMT-Cap-H2-eGFP.011.nd2	3	Kc cell FISH_2L 488 and X Cy3_pMT-Cap-H2-MBM-eGFP.007.nd2	2	Kc cell FISH_2L 488 and X Cy3_pMT-Cap-H2-MBM-eGFP.002.nd2	1	Kc cell FISH_2L 488 and X Cy3_pMT-Cap-H2-dC23-eGFP.006.nd2	1	Kc cell FISH_2L 488 and X Cy3_pMT-Cap-H2-dC23-eGFP.007.nd2	2	Kc FISH_X and 2L_CapH2-MBM-dC23-eGFP_100x_512setting2_005.nd2	1	Kc FISH_X and 2L_CapH2-MBM-dC23-eGFP_100x_512setting2_001.nd2	3
Kc cell FISH_2L 488 and X Cy3_pMT-eGFP.002.nd2	1	Kc cell FISH_2L 488 and X Cy3_pMT-eGFP.007.nd2	1	Kc cell FISH_2L 488 and X Cy3_pMT-Cap-H2-eGFP.009.nd2	1	Kc cell FISH_2L 488 and X Cy3_pMT-Cap-H2-eGFP.009.nd2	1	Kc cell FISH_2L 488 and X Cy3_pMT-Cap-H2-MBM-eGFP.006.nd2	1	Kc cell FISH_2L 488 and X Cy3_pMT-Cap-H2-MBM-eGFP.006.nd2	1	Kc cell FISH_2L 488 and X Cy3_pMT-Cap-H2-dC23-eGFP.002.nd2	2	Kc cell FISH_2L 488 and X Cy3_pMT-Cap-H2-dC23-eGFP.004.nd2	1	Kc FISH_X and 2L_CapH2-MBM-dC23-eGFP_100x_512setting2_002.nd2	1	Kc FISH_X and 2L_CapH2-MBM-dC23-eGFP_100x_512setting2_005.nd2	1
Kc cell FISH_2L 488 and X Cy3_pMT-eGFP.004.nd2	2	Kc cell FISH_2L 488 and X Cy3_pMT-eGFP.006.nd2	1	Kc cell FISH_2L 488 and X Cy3_pMT-Cap-H2-eGFP.013.nd2	2	Kc cell FISH_2L 488 and X Cy3_pMT-Cap-H2-eGFP.009.nd2	1	Kc cell FISH_2L 488 and X Cy3_pMT-Cap-H2-MBM-eGFP.006.nd2	1	Kc cell FISH_2L 488 and X Cy3_pMT-Cap-H2-MBM-eGFP.004.nd2	1	Kc cell FISH_2L 488 and X Cy3_pMT-Cap-H2-dC23-eGFP.007.nd2	3	Kc cell FISH_2L 488 and X Cy3_pMT-Cap-H2-dC23-eGFP.004.nd2	5	Kc FISH_X and 2L_CapH2-MBM-dC23-eGFP_100x_512setting2_004.nd2	1	Kc FISH_X and 2L_CapH2-MBM-dC23-eGFP_100x_512setting2_004.nd2	2
Kc cell FISH_2L 488 and X Cy3_pMT-eGFP.004.nd2	1	Kc cell FISH_2L 488 and X Cy3_pMT-eGFP.001.nd2	2	Kc cell FISH_2L 488 and X Cy3_pMT-Cap-H2-eGFP.009.nd2	3	Kc cell FISH_2L 488 and X Cy3_pMT-Cap-H2-eGFP.014.nd2	1	Kc cell FISH_2L 488 and X Cy3_pMT-Cap-H2-MBM-eGFP.004.nd2	1	Kc cell FISH_2L 488 and X Cy3_pMT-Cap-H2-MBM-eGFP.003.nd2	1	Kc cell FISH_2L 488 and X Cy3_pMT-Cap-H2-dC23-eGFP.002.nd2	3	Kc cell FISH_2L 488 and X Cy3_pMT-Cap-H2-dC23-eGFP.006.nd2	2	Kc FISH_X and 2L_CapH2-MBM-dC23-eGFP_100x_512setting2_002.nd2	3	Kc FISH_X and 2L_CapH2-MBM-dC23-eGFP_100x_512setting2_006.nd2	2
Kc cell FISH_2L 488 and X Cy3_pMT-eGFP.007.nd2	1	Kc cell FISH_2L 488 and X Cy3_pMT-eGFP.007.nd2	1	Kc cell FISH_2L 488 and X Cy3_pMT-Cap-H2-eGFP.010.nd2	2	Kc cell FISH_2L 488 and X Cy3_pMT-Cap-H2-eGFP.011.nd2	3	Kc cell FISH_2L 488 and X Cy3_pMT-Cap-H2-MBM-eGFP.001.nd2	1	Kc cell FISH_2L 488 and X Cy3_pMT-Cap-H2-MBM-eGFP.001.nd2	2	Kc cell FISH_2L 488 and X Cy3_pMT-Cap-H2-dC23-eGFP.005.nd2	1	Kc cell FISH_2L 488 and X Cy3_pMT-Cap-H2-dC23-eGFP.004.nd2	3	Kc FISH_X and 2L_CapH2-MBM-dC23-eGFP_100x_512setting2_004.nd2	2	Kc FISH_X and 2L_CapH2-MBM-dC23-eGFP_100x_512setting2_003.nd2	1
Kc cell FISH_2L 488 and X Cy3_pMT-eGFP.003.nd2	1	Kc cell FISH_2L 488 and X Cy3_pMT-eGFP.004.nd2	2	Kc cell FISH_2L 488 and X Cy3_pMT-Cap-H2-eGFP.011.nd2	1	Kc cell FISH_2L 488 and X Cy3_pMT-Cap-H2-eGFP.011.nd2	1	Kc cell FISH_2L 488 and X Cy3_pMT-Cap-H2-MBM-eGFP.001.nd2	1	Kc cell FISH_2L 488 and X Cy3_pMT-Cap-H2-MBM-eGFP.003.nd2	2	Kc cell FISH_2L 488 and X Cy3_pMT-Cap-H2-dC23-eGFP.004.nd2	1	Kc cell FISH_2L 488 and X Cy3_pMT-Cap-H2-dC23-eGFP.002.nd2	3	Kc FISH_X and 2L_CapH2-MBM-dC23-eGFP_100x_512setting2_005.nd2	1	Kc FISH_X and 2L_CapH2-MBM-dC23-eGFP_100x_512setting2_004.nd2	2
Kc cell FISH_2L 488 and X Cy3_pMT-eGFP.007.nd2	2	Kc cell FISH_2L 488 and X Cy3_pMT-eGFP.001.nd2	1	Kc cell FISH_2L 488 and X Cy3_pMT-Cap-H2-eGFP.012.nd2	1	Kc cell FISH_2L 488 and X Cy3_pMT-Cap-H2-eGFP.014.nd2	1	Kc cell FISH_2L 488 and X Cy3_pMT-Cap-H2-MBM-eGFP.004.nd2	1	Kc cell FISH_2L 488 and X Cy3_pMT-Cap-H2-MBM-eGFP.007.nd2	1	Kc cell FISH_2L 488 and X Cy3_pMT-Cap-H2-dC23-eGFP.005.nd2	2	Kc cell FISH_2L 488 and X Cy3_pMT-Cap-H2-dC23-eGFP.002.nd2	3	Kc FISH_X and 2L_CapH2-MBM-dC23-eGFP_100x_512setting2_002.nd2	2	Kc FISH_X and 2L_CapH2-MBM-dC23-eGFP_100x_512setting2_003.nd2	1
Kc cell FISH_2L 488 and X Cy3_pMT-eGFP.006.nd2	1	Kc cell FISH_2L 488 and X Cy3_pMT-eGFP.007.nd2	1	Kc cell FISH_2L 488 and X Cy3_pMT-Cap-H2-eGFP.008.nd2	1	Kc cell FISH_2L 488 and X Cy3_pMT-Cap-H2-eGFP.009.nd2	1	Kc cell FISH_2L 488 and X Cy3_pMT-Cap-H2-MBM-eGFP.001.nd2	2	Kc cell FISH_2L 488 and X Cy3_pMT-Cap-H2-MBM-eGFP.002.nd2	2	Kc cell FISH_2L 488 and X Cy3_pMT-Cap-H2-dC23-eGFP.003.nd2	2	Kc cell FISH_2L 488 and X Cy3_pMT-Cap-H2-dC23-eGFP.001.nd2	1	Kc FISH_X and 2L_CapH2-MBM-dC23-eGFP_100x_512setting2_001.nd2	2	Kc FISH_X and 2L_CapH2-MBM-dC23-eGFP_100x_512setting2_003.nd2	3
Kc cell FISH_2L 488 and X Cy3_pMT-eGFP.003.nd2	1	Kc cell FISH_2L 488 and X Cy3_pMT-eGFP.004.nd2	1	Kc cell FISH_2L 488 and X Cy3_pMT-Cap-H2-eGFP.014.nd2	1	Kc cell FISH_2L 488 and X Cy3_pMT-Cap-H2-eGFP.008.nd2	2	Kc cell FISH_2L 488 and X Cy3_pMT-Cap-H2-MBM-eGFP.007.nd2	1	Kc cell FISH_2L 488 and X Cy3_pMT-Cap-H2-MBM-eGFP.003.nd2	1	Kc cell FISH_2L 488 and X Cy3_pMT-Cap-H2-dC23-eGFP.001.nd2	3	Kc cell FISH_2L 488 and X Cy3_pMT-Cap-H2-dC23-eGFP.004.nd2	2	Kc FISH_X and 2L_CapH2-MBM-dC23-eGFP_100x_512setting2_007.nd2	1	Kc FISH_X and 2L_CapH2-MBM-dC23-eGFP_100x_512setting2_004.nd2	1
Kc cell FISH_2L 488 and X Cy3_pMT-eGFP.005.nd2	1	Kc cell FISH_2L 488 and X Cy3_pMT-eGFP.002.nd2	1	Kc cell FISH_2L 488 and X Cy3_pMT-Cap-H2-eGFP.014.nd2	2	Kc cell FISH_2L 488 and X Cy3_pMT-Cap-H2-eGFP.010.nd2	1	Kc cell FISH_2L 488 and X Cy3_pMT-Cap-H2-MBM-eGFP.003.nd2	2	Kc cell FISH_2L 488 and X Cy3_pMT-Cap-H2-MBM-eGFP.004.nd2	2	Kc cell FISH_2L 488 and X Cy3_pMT-Cap-H2-dC23-eGFP.001.nd2	2	Kc cell FISH_2L 488 and X Cy3_pMT-Cap-H2-dC23-eGFP.003.nd2	2	Kc FISH_X and 2L_CapH2-MBM-dC23-eGFP_100x_512setting2_003.nd2	1	Kc FISH_X and 2L_CapH2-MBM-dC23-eGFP_100x_512setting2_003.nd2	2
Kc cell FISH_2L 488 and X Cy3_pMT-eGFP.002.nd2	1	Kc cell FISH_2L 488 and X Cy3_pMT-eGFP.001.nd2	1	Kc cell FISH_2L 488 and X Cy3_pMT-Cap-H2-eGFP.011.nd2	1	Kc cell FISH_2L 488 and X Cy3_pMT-Cap-H2-eGFP.009.nd2	2	Kc cell FISH_2L 488 and X Cy3_pMT-Cap-H2-MBM-eGFP.006.nd2	3	Kc cell FISH_2L 488 and X Cy3_pMT-Cap-H2-MBM-eGFP.001.nd2	2	Kc cell FISH_2L 488 and X Cy3_pMT-Cap-H2-dC23-eGFP.001.nd2	3	Kc cell FISH_2L 488 and X Cy3_pMT-Cap-H2-dC23-eGFP.005.nd2	2	Kc FISH_X and 2L_CapH2-MBM-dC23-eGFP_100x_512setting2_006.nd2	3	Kc FISH_X and 2L_CapH2-MBM-dC23-eGFP_100x_512setting2_006.nd2	1
Kc cell FISH_2L 488 and X Cy3_pMT-eGFP.002.nd2	1	Kc cell FISH_2L 488 and X Cy3_pMT-eGFP.007.nd2	2	Kc cell FISH_2L 488 and X Cy3_pMT-Cap-H2-eGFP.008.nd2	1	Kc cell FISH_2L 488 and X Cy3_pMT-Cap-H2-eGFP.013.nd2	2	Kc cell FISH_2L 488 and X Cy3_pMT-Cap-H2-MBM-eGFP.003.nd2	3	Kc cell FISH_2L 488 and X Cy3_pMT-Cap-H2-MBM-eGFP.005.nd2	2	Kc cell FISH_2L 488 and X Cy3_pMT-Cap-H2-dC23-eGFP.006.nd2	1	Kc cell FISH_2L 488 and X Cy3_pMT-Cap-H2-dC23-eGFP.007.nd2	1	Kc FISH_X and 2L_CapH2-MBM-dC23-eGFP_100x_512setting2_005.nd2	3	Kc FISH_X and 2L_CapH2-MBM-dC23-eGFP_100x_512setting2_007.nd2	2
Kc cell FISH_2L 488 and X Cy3_pMT-eGFP.001.nd2	3	Kc cell FISH_2L 488 and X Cy3_pMT-eGFP.007.nd2	1	Kc cell FISH_2L 488 and X Cy3_pMT-Cap-H2-eGFP.008.nd2	2	Kc cell FISH_2L 488 and X Cy3_pMT-Cap-H2-eGFP.008.nd2	2	Kc cell FISH_2L 488 and X Cy3_pMT-Cap-H2-MBM-eGFP.001.nd2	1	Kc cell FISH_2L 488 and X Cy3_pMT-Cap-H2-MBM-eGFP.007.nd2	1	Kc cell FISH_2L 488 and X Cy3_pMT-Cap-H2-dC23-eGFP.005.nd2	1	Kc cell FISH_2L 488 and X Cy3_pMT-Cap-H2-dC23-eGFP.005.nd2	1	Kc FISH_X and 2L_CapH2-MBM-dC23-eGFP_100x_512setting2_004.nd2	2	Kc FISH_X and 2L_CapH2-MBM-dC23-eGFP_100x_512setting2_001.nd2	2
Kc cell FISH_2L 488 and X Cy3_pMT-eGFP.002.nd2	1	Kc cell FISH_2L 488 and X Cy3_pMT-eGFP.002.nd2	1	Kc cell FISH_2L 488 and X Cy3_pMT-Cap-H2-eGFP.011.nd2	1	Kc cell FISH_2L 488 and X Cy3_pMT-Cap-H2-eGFP.010.nd2	3	Kc cell FISH_2L 488 and X Cy3_pMT-Cap-H2-MBM-eGFP.006.nd2	1	Kc cell FISH_2L 488 and X Cy3_pMT-Cap-H2-MBM-eGFP.005.nd2	1	Kc cell FISH_2L 488 and X Cy3_pMT-Cap-H2-dC23-eGFP.002.nd2	3	Kc cell FISH_2L 488 and X Cy3_pMT-Cap-H2-dC23-eGFP.001.nd2	1	Kc FISH_X and 2L_CapH2-MBM-dC23-eGFP_100x_512setting2_002.nd2	2	Kc FISH_X and 2L_CapH2-MBM-dC23-eGFP_100x_512setting2_002.nd2	2
Kc cell FISH_2L 488 and X Cy3_pMT-eGFP.004.nd2	1	Kc cell FISH_2L 488 and X Cy3_pMT-eGFP.002.nd2	1	Kc cell FISH_2L 488 and X Cy3_pMT-Cap-H2-eGFP.008.nd2	4	Kc cell FISH_2L 488 and X Cy3_pMT-Cap-H2-eGFP.014.nd2	2	Kc cell FISH_2L 488 and X Cy3_pMT-Cap-H2-MBM-eGFP.001.nd2	1	Kc cell FISH_2L 488 and X Cy3_pMT-Cap-H2-MBM-eGFP.001.nd2	1	Kc cell FISH_2L 488 and X Cy3_pMT-Cap-H2-dC23-eGFP.005.nd2	2	Kc cell FISH_2L 488 and X Cy3_pMT-Cap-H2-dC23-eGFP.005.nd2	2	Kc FISH_X and 2L_CapH2-MBM-dC23-eGFP_100x_512setting2_005.nd2	1	Kc FISH_X and 2L_CapH2-MBM-dC23-eGFP_100x_512setting2_005.nd2	2
Kc cell FISH_2L 488 and X Cy3_pMT-eGFP.002.nd2	1	Kc cell FISH_2L 488 and X Cy3_pMT-eGFP.001.nd2	2	Kc cell FISH_2L 488 and X Cy3_pMT-Cap-H2-eGFP.008.nd2	1	Kc cell FISH_2L 488 and X Cy3_pMT-Cap-H2-eGFP.008.nd2	1	Kc cell FISH_2L 488 and X Cy3_pMT-Cap-H2-MBM-eGFP.005.nd2	2	Kc cell FISH_2L 488 and X Cy3_pMT-Cap-H2-MBM-eGFP.003.nd2	2	Kc cell FISH_2L 488 and X Cy3_pMT-Cap-H2-dC23-eGFP.004.nd2	1	Kc cell FISH_2L 488 and X Cy3_pMT-Cap-H2-dC23-eGFP.006.nd2	1	Kc FISH_X and 2L_CapH2-MBM-dC23-eGFP_100x_512setting2_002.nd2	4	Kc FISH_X and 2L_CapH2-MBM-dC23-eGFP_100x_512setting2_001.nd2	1
Kc cell FISH_2L 488 and X Cy3_pMT-eGFP.003.nd2	1	Kc cell FISH_2L 488 and X Cy3_pMT-eGFP.002.nd2	1	Kc cell FISH_2L 488 and X Cy3_pMT-Cap-H2-eGFP.014.nd2	1	Kc cell FISH_2L 488 and X Cy3_pMT-Cap-H2-eGFP.014.nd2	1	Kc cell FISH_2L 488 and X Cy3_pMT-Cap-H2-MBM-eGFP.002.nd2	2	Kc cell FISH_2L 488 and X Cy3_pMT-Cap-H2-MBM-eGFP.004.nd2	2	Kc cell FISH_2L 488 and X Cy3_pMT-Cap-H2-dC23-eGFP.001.nd2	1	Kc cell FISH_2L 488 and X Cy3_pMT-Cap-H2-dC23-eGFP.002.nd2	1	Kc FISH_X and 2L_CapH2-MBM-dC23-eGFP_100x_512setting2_004.nd2	1	Kc FISH_X and 2L_CapH2-MBM-dC23-eGFP_100x_512setting2_004.nd2	1
Kc cell FISH_2L 488 and X Cy3_pMT-eGFP.007.nd2	2	Kc cell FISH_2L 488 and X Cy3_pMT-eGFP.003.nd2	1	Kc cell FISH_2L 488 and X Cy3_pMT-Cap-H2-eGFP.011.nd2	2	Kc cell FISH_2L 488 and X Cy3_pMT-Cap-H2-eGFP.014.nd2	3	Kc cell FISH_2L 488 and X Cy3_pMT-Cap-H2-MBM-eGFP.005.nd2	2	Kc cell FISH_2L 488 and X Cy3_pMT-Cap-H2-MBM-eGFP.005.nd2	2	Kc cell FISH_2L 488 and X Cy3_pMT-Cap-H2-dC23-eGFP.005.nd2	2	Kc cell FISH_2L 488 and X Cy3_pMT-Cap-H2-dC23-eGFP.007.nd2	2	Kc FISH_X and 2L_CapH2-MBM-dC23-eGFP_100x_512setting2_003.nd2	1	Kc FISH_X and 2L_CapH2-MBM-dC23-eGFP_100x_512setting2_001.nd2	2
Kc cell FISH_2L 488 and X Cy3_pMT-eGFP.001.nd2	1	Kc cell FISH_2L 488 and X Cy3_pMT-eGFP.005.nd2	1	Kc cell FISH_2L 488 and X Cy3_pMT-Cap-H2-eGFP.009.nd2	1	Kc cell FISH_2L 488 and X Cy3_pMT-Cap-H2-eGFP.014.nd2	1	Kc cell FISH_2L 488 and X Cy3_pMT-Cap-H2-MBM-eGFP.006.nd2	2	Kc cell FISH_2L 488 and X Cy3_pMT-Cap-H2-MBM-eGFP.004.nd2	1	Kc cell FISH_2L 488 and X Cy3_pMT-Cap-H2-dC23-eGFP.002.nd2	2	Kc cell FISH_2L 488 and X Cy3_pMT-Cap-H2-dC23-eGFP.005.nd2	2	Kc FISH_X and 2L_CapH2-MBM-dC23-eGFP_100x_512setting2_006.nd2	2	Kc FISH_X and 2L_CapH2-MBM-dC23-eGFP_100x_512setting2_002.nd2	2
Kc cell FISH_2L 488 and X Cy3_pMT-eGFP.002.nd2	1	Kc cell FISH_2L 488 and X Cy3_pMT-eGFP.003.nd2	1	Kc cell FISH_2L 488 and X Cy3_pMT-Cap-H2-eGFP.013.nd2	1	Kc cell FISH_2L 488 and X Cy3_pMT-Cap-H2-eGFP.008.nd2	1	Kc cell FISH_2L 488 and X Cy3_pMT-Cap-H2-MBM-eGFP.004.nd2	1	Kc cell FISH_2L 488 and X Cy3_pMT-Cap-H2-MBM-eGFP.007.nd2	1	Kc cell FISH_2L 488 and X Cy3_pMT-Cap-H2-dC23-eGFP.006.nd2	2	Kc cell FISH_2L 488 and X Cy3_pMT-Cap-H2-dC23-eGFP.002.nd2	2	Kc FISH_X and 2L_CapH2-MBM-dC23-eGFP_100x_512setting2_001.nd2	2	Kc FISH_X and 2L_CapH2-MBM-dC23-eGFP_100x_512setting2_002.nd2	2
Kc cell FISH_2L 488 and X Cy3_pMT-eGFP.006.nd2	1	Kc cell FISH_2L 488 and X Cy3_pMT-eGFP.002.nd2	2	Kc cell FISH_2L 488 and X Cy3_pMT-Cap-H2-eGFP.008.nd2	1	Kc cell FISH_2L 488 and X Cy3_pMT-Cap-H2-eGFP.014.nd2	1	Kc cell FISH_2L 488 and X Cy3_pMT-Cap-H2-MBM-eGFP.003.nd2	1	Kc cell FISH_2L 488 and X Cy3_pMT-Cap-H2-MBM-eGFP.001.nd2	2	Kc cell FISH_2L 488 and X Cy3_pMT-Cap-H2-dC23-eGFP.005.nd2	2	Kc cell FISH_2L 488 and X Cy3_pMT-Cap-H2-dC23-eGFP.005.nd2	1	Kc FISH_X and 2L_CapH2-MBM-dC23-eGFP_100x_512setting2_005.nd2	2	Kc FISH_X and 2L_CapH2-MBM-dC23-eGFP_100x_512setting2_006.nd2	1
Kc cell FISH_2L 488 and X Cy3_pMT-eGFP.004.nd2	1	Kc cell FISH_2L 488 and X Cy3_pMT-eGFP.004.nd2	1	Kc cell FISH_2L 488 and X Cy3_pMT-Cap-H2-eGFP.013.nd2	2	Kc cell FISH_2L 488 and X Cy3_pMT-Cap-H2-eGFP.012.nd2	1	Kc cell FISH_2L 488 and X Cy3_pMT-Cap-H2-MBM-eGFP.001.nd2	1	Kc cell FISH_2L 488 and X Cy3_pMT-Cap-H2-MBM-eGFP.007.nd2	1	Kc cell FISH_2L 488 and X Cy3_pMT-Cap-H2-dC23-eGFP.005.nd2	2	Kc cell FISH_2L 488 and X Cy3_pMT-Cap-H2-dC23-eGFP.005.nd2	2	Kc FISH_X and 2L_CapH2-MBM-dC23-eGFP_100x_512setting2_007.nd2	1	Kc FISH_X and 2L_CapH2-MBM-dC23-eGFP_100x_512setting2_001.nd2	1
Kc cell FISH_2L 488 and X Cy3_pMT-eGFP.001.nd2	1	Kc cell FISH_2L 488 and X Cy3_pMT-eGFP.004.nd2	2	Kc cell FISH_2L 488 and X Cy3_pMT-Cap-H2-eGFP.012.nd2	4	Kc cell FISH_2L 488 and X Cy3_pMT-Cap-H2-eGFP.012.nd2	1	Kc cell FISH_2L 488 and X Cy3_pMT-Cap-H2-MBM-eGFP.006.nd2	1	Kc cell FISH_2L 488 and X Cy3_pMT-Cap-H2-MBM-eGFP.004.nd2	1	Kc cell FISH_2L 488 and X Cy3_pMT-Cap-H2-dC23-eGFP.001.nd2	1	Kc cell FISH_2L 488 and X Cy3_pMT-Cap-H2-dC23-eGFP.001.nd2	2	Kc FISH_X and 2L_CapH2-MBM-dC23-eGFP_100x_512setting2_004.nd2	2	Kc FISH_X and 2L_CapH2-MBM-dC23-eGFP_100x_512setting2_005.nd2	2
Kc cell FISH_2L 488 and X Cy3_pMT-eGFP.007.nd2	1	Kc cell FISH_2L 488 and X Cy3_pMT-eGFP.002.nd2	1	Kc cell FISH_2L 488 and X Cy3_pMT-Cap-H2-eGFP.014.nd2	2	Kc cell FISH_2L 488 and X Cy3_pMT-Cap-H2-eGFP.014.nd2	1	Kc cell FISH_2L 488 and X Cy3_pMT-Cap-H2-MBM-eGFP.002.nd2	1	Kc cell FISH_2L 488 and X Cy3_pMT-Cap-H2-MBM-eGFP.004.nd2	2	Kc cell FISH_2L 488 and X Cy3_pMT-Cap-H2-dC23-eGFP.001.nd2	1	Kc cell FISH_2L 488 and X Cy3_pMT-Cap-H2-dC23-eGFP.002.nd2	1	Kc FISH_X and 2L_CapH2-MBM-dC23-eGFP_100x_512setting2_006.nd2	2	Kc FISH_X and 2L_CapH2-MBM-dC23-eGFP_100x_512setting2_007.nd2	1
Kc cell FISH_2L 488 and X Cy3_pMT-eGFP.003.nd2	1	Kc cell FISH_2L 488 and X Cy3_pMT-eGFP.001.nd2	1	Kc cell FISH_2L 488 and X Cy3_pMT-Cap-H2-eGFP.012.nd2	3	Kc cell FISH_2L 488 and X Cy3_pMT-Cap-H2-eGFP.009.nd2	3	Kc cell FISH_2L 488 and X Cy3_pMT-Cap-H2-MBM-eGFP.003.nd2	1	Kc cell FISH_2L 488 and X Cy3_pMT-Cap-H2-MBM-eGFP.002.nd2	1	Kc cell FISH_2L 488 and X Cy3_pMT-Cap-H2-dC23-eGFP.004.nd2	3	Kc cell FISH_2L 488 and X Cy3_pMT-Cap-H2-dC23-eGFP.006.nd2	1	Kc FISH_X and 2L_CapH2-MBM-dC23-eGFP_100x_512setting2_007.nd2	2	Kc FISH_X and 2L_CapH2-MBM-dC23-eGFP_100x_512setting2_004.nd2	1
Kc cell FISH_2L 488 and X Cy3_pMT-eGFP.006.nd2	1	Kc cell FISH_2L 488 and X Cy3_pMT-eGFP.004.nd2	1	Kc cell FISH_2L 488 and X Cy3_pMT-Cap-H2-eGFP.009.nd2	1	Kc cell FISH_2L 488 and X Cy3_pMT-Cap-H2-eGFP.011.nd2	1	Kc cell FISH_2L 488 and X Cy3_pMT-Cap-H2-MBM-eGFP.001.nd2	1	Kc cell FISH_2L 488 and X Cy3_pMT-Cap-H2-MBM-eGFP.006.nd2	1	Kc cell FISH_2L 488 and X Cy3_pMT-Cap-H2-dC23-eGFP.006.nd2	1	Kc cell FISH_2L 488 and X Cy3_pMT-Cap-H2-dC23-eGFP.002.nd2	1	Kc FISH_X and 2L_CapH2-MBM-dC23-eGFP_100x_512setting2_007.nd2	2	Kc FISH_X and 2L_CapH2-MBM-dC23-eGFP_100x_512setting2_001.nd2	2
Kc cell FISH_2L 488 and X Cy3_pMT-eGFP.007.nd2	2	Kc cell FISH_2L 488 and X Cy3_pMT-eGFP.001.nd2	1	Kc cell FISH_2L 488 and X Cy3_pMT-Cap-H2-eGFP.010.nd2	1	Kc cell FISH_2L 488 and X Cy3_pMT-Cap-H2-eGFP.010.nd2	2	Kc cell FISH_2L 488 and X Cy3_pMT-Cap-H2-MBM-eGFP.006.nd2	1	Kc cell FISH_2L 488 and X Cy3_pMT-Cap-H2-MBM-eGFP.007.nd2	2	Kc cell FISH_2L 488 and X Cy3_pMT-Cap-H2-dC23-eGFP.006.nd2	1	Kc cell FISH_2L 488 and X Cy3_pMT-Cap-H2-dC23-eGFP.005.nd2	1	Kc FISH_X and 2L_CapH2-MBM-dC23-eGFP_100x_512setting2_003.nd2	2	Kc FISH_X and 2L_CapH2-MBM-dC23-eGFP_100x_512setting2_006.nd2	1
Kc cell FISH_2L 488 and X Cy3_pMT-eGFP.002.nd2	1	Kc cell FISH_2L 488 and X Cy3_pMT-eGFP.003.nd2	2	Kc cell FISH_2L 488 and X Cy3_pMT-Cap-H2-eGFP.010.nd2	1	Kc cell FISH_2L 488 and X Cy3_pMT-Cap-H2-eGFP.012.nd2	1	Kc cell FISH_2L 488 and X Cy3_pMT-Cap-H2-MBM-eGFP.001.nd2	2	Kc cell FISH_2L 488 and X Cy3_pMT-Cap-H2-MBM-eGFP.004.nd2	1	Kc cell FISH_2L 488 and X Cy3_pMT-Cap-H2-dC23-eGFP.001.nd2	2	Kc cell FISH_2L 488 and X Cy3_pMT-Cap-H2-dC23-eGFP.005.nd2	1	Kc FISH_X and 2L_CapH2-MBM-dC23-eGFP_100x_512setting2_001.nd2	2	Kc FISH_X and 2L_CapH2-MBM-dC23-eGFP_100x_512setting2_005.nd2	1
Kc cell FISH_2L 488 and X Cy3_pMT-eGFP.007.nd2	1	Kc cell FISH_2L 488 and X Cy3_pMT-eGFP.004.nd2	1	Kc cell FISH_2L 488 and X Cy3_pMT-Cap-H2-eGFP.008.nd2	3	Kc cell FISH_2L 488 and X Cy3_pMT-Cap-H2-eGFP.010.nd2	2	Kc cell FISH_2L 488 and X Cy3_pMT-Cap-H2-MBM-eGFP.002.nd2	1	Kc cell FISH_2L 488 and X Cy3_pMT-Cap-H2-MBM-eGFP.002.nd2	2	Kc cell FISH_2L 488 and X Cy3_pMT-Cap-H2-dC23-eGFP.003.nd2	3	Kc cell FISH_2L 488 and X Cy3_pMT-Cap-H2-dC23-eGFP.002.nd2	2	Kc FISH_X and 2L_CapH2-MBM-dC23-eGFP_100x_512setting2_006.nd2	2	Kc FISH_X and 2L_CapH2-MBM-dC23-eGFP_100x_512setting2_004.nd2	2
Kc cell FISH_2L 488 and X Cy3_pMT-eGFP.006.nd2	1	Kc cell FISH_2L 488 and X Cy3_pMT-eGFP.005.nd2	1	Kc cell FISH_2L 488 and X Cy3_pMT-Cap-H2-eGFP.008.nd2	1	Kc cell FISH_2L 488 and X Cy3_pMT-Cap-H2-eGFP.012.nd2	1	Kc cell FISH_2L 488 and X Cy3_pMT-Cap-H2-MBM-eGFP.002.nd2	2	Kc cell FISH_2L 488 and X Cy3_pMT-Cap-H2-MBM-eGFP.007.nd2	2	Kc cell FISH_2L 488 and X Cy3_pMT-Cap-H2-dC23-eGFP.006.nd2	2	Kc cell FISH_2L 488 and X Cy3_pMT-Cap-H2-dC23-eGFP.006.nd2	2	Kc FISH_X and 2L_CapH2-MBM-dC23-eGFP_100x_512setting2_001.nd2	2	Kc FISH_X and 2L_CapH2-MBM-dC23-eGFP_100x_512setting2_005.nd2	3
Kc cell FISH_2L 488 and X Cy3_pMT-eGFP.003.nd2	1	Kc cell FISH_2L 488 and X Cy3_pMT-eGFP.005.nd2	1	Kc cell FISH_2L 488 and X Cy3_pMT-Cap-H2-eGFP.014.nd2	1	Kc cell FISH_2L 488 and X Cy3_pMT-Cap-H2-eGFP.014.nd2	2	Kc cell FISH_2L 488 and X Cy3_pMT-Cap-H2-MBM-eGFP.007.nd2	1	Kc cell FISH_2L 488 and X Cy3_pMT-Cap-H2-MBM-eGFP.005.nd2	2	Kc cell FISH_2L 488 and X Cy3_pMT-Cap-H2-dC23-eGFP.005.nd2	1	Kc cell FISH_2L 488 and X Cy3_pMT-Cap-H2-dC23-eGFP.004.nd2	1	Kc FISH_X and 2L_CapH2-MBM-dC23-eGFP_100x_512setting2_006.nd2	2	Kc FISH_X and 2L_CapH2-MBM-dC23-eGFP_100x_512setting2_006.nd2	2
Kc FISH_X and 2L_pMT-eGFP_100x_512setting1_010.nd2	2	Kc FISH_X and 2L_pMT-eGFP_100x_512setting1_010.nd2	2	Kc FISH_X and 2L_Cap-H2-eGFP_100x_512setting4_005.nd2	1	Kc FISH_X and 2L_Cap-H2-eGFP_100x_512setting3_001.nd2	3	Kc FISH_X and 2L_Cap-H2-MBM-eGFP_100x_512setting5_004.nd2	2	Kc FISH_X and 2L_Cap-H2-MBM-eGFP_100x_512setting1_001.nd2	1	Kc FISH_X and 2L_CapH2-dC23-eGFP_100x_setting2_003.nd2	2	Kc FISH_X and 2L_CapH2-dC23-eGFP_100x_512setting2_011.nd2	2	Kc FISH_x Cy3_2L 488_dC23-MBMrep1_condition2_006.nd2	1	Kc FISH_x Cy3_2L 488_dC23-MBMrep1_condition1_002.nd2	2
Kc FISH_X and 2L_pMT-eGFP_100x_512setting1_010.nd2	3	Kc FISH_X and 2L_pMT-eGFP_100x_512setting1_010.nd2	2	Kc FISH_X and 2L_Cap-H2-eGFP_100x_512setting3_001.nd2	3	Kc FISH_X and 2L_Cap-H2-eGFP_100x_512setting2_006.nd2	1	Kc FISH_X and 2L_Cap-H2-MBM-eGFP_100x_512setting5_002.nd2	2	Kc FISH_X and 2L_Cap-H2-MBM-eGFP_100x_512setting5_003.nd2	1	Kc FISH_X and 2L_CapH2-dC23-eGFP_100x_setting3_004.nd2	3	Kc FISH_X and 2L_CapH2-dC23-eGFP_100x_setting2_003.nd2	1	Kc FISH_x Cy3_2L 488_dC23-MBMrep1_condition2_007.nd2	2	Kc FISH_x Cy3_2L 488_dC23-MBMrep1_condition2_004.nd2	2
Kc FISH_X and 2L_pMT-eGFP_100x_512setting1_010.nd2	1	Kc FISH_X and 2L_pMT-eGFP_100x_512setting1_010.nd2	2	Kc FISH_X and 2L_Cap-H2-eGFP_100x_512setting3_003.nd2	1	Kc FISH_X and 2L_Cap-H2-eGFP_100x_512setting3_001.nd2	2	Kc FISH_X and 2L_Cap-H2-MBM-eGFP_100x_512setting5_004.nd2	1	Kc FISH_X and 2L_Cap-H2-MBM-eGFP_100x_512setting5_006.nd2	1	Kc FISH_X and 2L_CapH2-dC23-eGFP_100x_512_007.nd2	2	Kc FISH_X and 2L_CapH2-dC23-eGFP_100x_512setting2_010.nd2	2	Kc FISH_x Cy3_2L 488_dC23-MBMrep1_condition2_007.nd2	1	Kc FISH_x Cy3_2L 488_dC23-MBMrep1_condition2_008.nd2	1
Kc FISH_X and 2L_pMT-eGFP_100x_512setting1_010.nd2	1	Kc FISH_X and 2L_pMT-eGFP_100x_512setting1_010.nd2	2	Kc FISH_X and 2L_Cap-H2-eGFP_100x_512setting4_004.nd2	2	Kc FISH_X and 2L_Cap-H2-eGFP_100x_512setting4_004.nd2	3	Kc FISH_X and 2L_Cap-H2-MBM-eGFP_100x_512setting5_004.nd2	1	Kc FISH_X and 2L_Cap-H2-MBM-eGFP_100x_512setting5_004.nd2	2	Kc FISH_X and 2L_CapH2-dC23-eGFP_100x_512setting2_011.nd2	3	Kc FISH_X and 2L_CapH2-dC23-eGFP_100x_512_007.nd2	1	Kc FISH_x Cy3_2L 488_dC23-MBMrep1_condition2_003.nd2	1	Kc FISH_x Cy3_2L 488_dC23-MBMrep1_condition1_001.nd2	3
Kc FISH_X and 2L_pMT-eGFP_100x_512setting3_011.nd2	1	Kc FISH_X and 2L_pMT-eGFP_100x_512setting1_010.nd2	1	Kc FISH_X and 2L_Cap-H2-eGFP_100x_512setting3_002.nd2	1	Kc FISH_X and 2L_Cap-H2-eGFP_100x_512setting2_007.nd2	1	Kc FISH_X and 2L_Cap-H2-MBM-eGFP_100x_512setting5_004.nd2	2	Kc FISH_X and 2L_Cap-H2-MBM-eGFP_100x_512setting5_005.nd2	1	Kc FISH_X and 2L_CapH2-dC23-eGFP_100x_setting3_004.nd2	2	Kc FISH_X and 2L_CapH2-dC23-eGFP_100x_512setting2_011.nd2	2	Kc FISH_x Cy3_2L 488_dC23-MBMrep1_condition2_006.nd2	1	Kc FISH_x Cy3_2L 488_dC23-MBMrep1_condition2_009.nd2	2
Kc FISH_X and 2L_pMT-eGFP_100x_512setting2_008.nd2	1	Kc FISH_X and 2L_pMT-eGFP_100x_512setting1_010.nd2	2	Kc FISH_X and 2L_Cap-H2-eGFP_100x_512setting3_003.nd2	1	Kc FISH_X and 2L_Cap-H2-eGFP_100x_512setting4_005.nd2	2	Kc FISH_X and 2L_Cap-H2-MBM-eGFP_100x_512setting5_002.nd2	2	Kc FISH_X and 2L_Cap-H2-MBM-eGFP_100x_512setting5_006.nd2	1	Kc FISH_X and 2L_CapH2-dC23-eGFP_100x_setting3_004.nd2	3	Kc FISH_X and 2L_CapH2-dC23-eGFP_100x_512_007.nd2	3	Kc FISH_x Cy3_2L 488_dC23-MBMrep1_condition1_002.nd2	1	Kc FISH_x Cy3_2L 488_dC23-MBMrep1_condition2_005.nd2	2
Kc FISH_X and 2L_pMT-eGFP_100x_512setting3_011.nd2	1	Kc FISH_X and 2L_pMT-eGFP_100x_512setting1_010.nd2	3	Kc FISH_X and 2L_Cap-H2-eGFP_100x_512setting4_005.nd2	1	Kc FISH_X and 2L_Cap-H2-eGFP_100x_512setting2_006.nd2	2	Kc FISH_X and 2L_Cap-H2-MBM-eGFP_100x_512setting1_001.nd2	2	Kc FISH_X and 2L_Cap-H2-MBM-eGFP_100x_512setting1_001.nd2	2	Kc FISH_X and 2L_CapH2-dC23-eGFP_100x_setting3_004.nd2	1	Kc FISH_X and 2L_CapH2-dC23-eGFP_100x_setting1_002.nd2	2	Kc FISH_x Cy3_2L 488_dC23-MBMrep1_condition2_007.nd2	1	Kc FISH_x Cy3_2L 488_dC23-MBMrep1_condition1_001.nd2	2
Kc FISH_X and 2L_pMT-eGFP_100x_512setting3_011.nd2	4	Kc FISH_X and 2L_pMT-eGFP_100x_512setting1_010.nd2	2	Kc FISH_X and 2L_Cap-H2-eGFP_100x_512setting3_001.nd2	2	Kc FISH_X and 2L_Cap-H2-eGFP_100x_512setting3_003.nd2	2	Kc FISH_X and 2L_Cap-H2-MBM-eGFP_100x_512setting5_006.nd2	2	Kc FISH_X and 2L_Cap-H2-MBM-eGFP_100x_512setting5_002.nd2	1	Kc FISH_X and 2L_CapH2-dC23-eGFP_100x_512_007.nd2	2	Kc FISH_X and 2L_CapH2-dC23-eGFP_100x_512setting2_011.nd2	1	Kc FISH_x Cy3_2L 488_dC23-MBMrep1_condition2_008.nd2	2	Kc FISH_x Cy3_2L 488_dC23-MBMrep1_condition1_001.nd2	1
Kc FISH_X and 2L_pMT-eGFP_100x_512setting2_009.nd2	2	Kc FISH_X and 2L_pMT-eGFP_100x_512setting1_010.nd2	2	Kc FISH_X and 2L_Cap-H2-eGFP_100x_512setting4_004.nd2	2	Kc FISH_X and 2L_Cap-H2-eGFP_100x_512setting3_002.nd2	2	Kc FISH_X and 2L_Cap-H2-MBM-eGFP_100x_512setting5_002.nd2	2	Kc FISH_X and 2L_Cap-H2-MBM-eGFP_100x_512setting5_006.nd2	1	Kc FISH_X and 2L_CapH2-dC23-eGFP_100x_setting3_006.nd2	2	Kc FISH_X and 2L_CapH2-dC23-eGFP_100x_512_009.nd2	3	Kc FISH_x Cy3_2L 488_dC23-MBMrep1_condition2_009.nd2	2	Kc FISH_x Cy3_2L 488_dC23-MBMrep1_condition2_005.nd2	1
Kc FISH_X and 2L_pMT-eGFP_100x_512setting1_010.nd2	1	Kc FISH_X and 2L_pMT-eGFP_100x_512setting1_010.nd2	2	Kc FISH_X and 2L_Cap-H2-eGFP_100x_512setting4_005.nd2	2	Kc FISH_X and 2L_Cap-H2-eGFP_100x_512setting3_002.nd2	1	Kc FISH_X and 2L_Cap-H2-MBM-eGFP_100x_512setting5_003.nd2	1	Kc FISH_X and 2L_Cap-H2-MBM-eGFP_100x_512setting5_003.nd2	2	Kc FISH_X and 2L_CapH2-dC23-eGFP_100x_512setting2_010.nd2	1	Kc FISH_X and 2L_CapH2-dC23-eGFP_100x_512_008.nd2	3	Kc FISH_x Cy3_2L 488_dC23-MBMrep1_condition2_008.nd2	1	Kc FISH_x Cy3_2L 488_dC23-MBMrep1_condition1_001.nd2	1
Kc FISH_X and 2L_pMT-eGFP_100x_512setting1_010.nd2	1	Kc FISH_X and 2L_pMT-eGFP_100x_512setting1_010.nd2	2	Kc FISH_X and 2L_Cap-H2-eGFP_100x_512setting2_007.nd2	1	Kc FISH_X and 2L_Cap-H2-eGFP_100x_512setting2_007.nd2	2	Kc FISH_X and 2L_Cap-H2-MBM-eGFP_100x_512setting5_002.nd2	2	Kc FISH_X and 2L_Cap-H2-MBM-eGFP_100x_512setting5_006.nd2	2	Kc FISH_X and 2L_CapH2-dC23-eGFP_100x_setting3_005.nd2	2	Kc FISH_X and 2L_CapH2-dC23-eGFP_100x_512_008.nd2	2	Kc FISH_x Cy3_2L 488_dC23-MBMrep1_condition2_008.nd2	1	Kc FISH_x Cy3_2L 488_dC23-MBMrep1_condition2_008.nd2	1
Kc FISH_X and 2L_pMT-eGFP_100x_512setting3_011.nd2	2	Kc FISH_X and 2L_pMT-eGFP_100x_512setting2_009.nd2	1	Kc FISH_X and 2L_Cap-H2-eGFP_100x_512setting4_005.nd2	1	Kc FISH_X and 2L_Cap-H2-eGFP_100x_512setting4_005.nd2	2	Kc FISH_X and 2L_Cap-H2-MBM-eGFP_100x_512setting5_003.nd2	1	Kc FISH_X and 2L_Cap-H2-MBM-eGFP_100x_512setting5_002.nd2	2	Kc FISH_X and 2L_CapH2-dC23-eGFP_100x_setting1_002.nd2	2	Kc FISH_X and 2L_CapH2-dC23-eGFP_100x_setting3_004.nd2	3	Kc FISH_x Cy3_2L 488_dC23-MBMrep1_condition2_006.nd2	2	Kc FISH_x Cy3_2L 488_dC23-MBMrep1_condition2_006.nd2	2
Kc FISH_X and 2L_pMT-eGFP_100x_512setting3_011.nd2	3	Kc FISH_X and 2L_pMT-eGFP_100x_512setting2_009.nd2	1	Kc FISH_X and 2L_Cap-H2-eGFP_100x_512setting4_004.nd2	2	Kc FISH_X and 2L_Cap-H2-eGFP_100x_512setting3_003.nd2	2	Kc FISH_X and 2L_Cap-H2-MBM-eGFP_100x_512setting5_006.nd2	1	Kc FISH_X and 2L_Cap-H2-MBM-eGFP_100x_512setting5_003.nd2	2	Kc FISH_X and 2L_CapH2-dC23-eGFP_100x_512_009.nd2	2	Kc FISH_X and 2L_CapH2-dC23-eGFP_100x_512_007.nd2	2	Kc FISH_x Cy3_2L 488_dC23-MBMrep1_condition1_002.nd2	2	Kc FISH_x Cy3_2L 488_dC23-MBMrep1_condition2_009.nd2	1
Kc FISH_X and 2L_pMT-eGFP_100x_512setting2_008.nd2	2	Kc FISH_X and 2L_pMT-eGFP_100x_512setting2_009.nd2	2	Kc FISH_X and 2L_Cap-H2-eGFP_100x_512setting4_004.nd2	3	Kc FISH_X and 2L_Cap-H2-eGFP_100x_512setting3_002.nd2	3	Kc FISH_X and 2L_Cap-H2-MBM-eGFP_100x_512setting5_006.nd2	2	Kc FISH_X and 2L_Cap-H2-MBM-eGFP_100x_512setting1_001.nd2	2	Kc FISH_X and 2L_CapH2-dC23-eGFP_100x_setting1_002.nd2	3	Kc FISH_X and 2L_CapH2-dC23-eGFP_100x_512setting2_011.nd2	2	Kc FISH_x Cy3_2L 488_dC23-MBMrep1_condition2_008.nd2	1	Kc FISH_x Cy3_2L 488_dC23-MBMrep1_condition2_004.nd2	1
Kc FISH_X and 2L_pMT-eGFP_100x_512setting2_008.nd2	1	Kc FISH_X and 2L_pMT-eGFP_100x_512setting2_009.nd2	2	Kc FISH_X and 2L_Cap-H2-eGFP_100x_512setting2_007.nd2	1	Kc FISH_X and 2L_Cap-H2-eGFP_100x_512setting2_006.nd2	3	Kc FISH_X and 2L_Cap-H2-MBM-eGFP_100x_512setting1_001.nd2	1	Kc FISH_X and 2L_Cap-H2-MBM-eGFP_100x_512setting5_004.nd2	2	Kc FISH_X and 2L_CapH2-dC23-eGFP_100x_512_008.nd2	1	Kc FISH_X and 2L_CapH2-dC23-eGFP_100x_512setting2_010.nd2	3	Kc FISH_x Cy3_2L 488_dC23-MBMrep1_condition2_009.nd2	2	Kc FISH_x Cy3_2L 488_dC23-MBMrep1_condition2_005.nd2	2
Kc FISH_X and 2L_pMT-eGFP_100x_512setting3_011.nd2	1	Kc FISH_X and 2L_pMT-eGFP_100x_512setting2_009.nd2	1	Kc FISH_X and 2L_Cap-H2-eGFP_100x_512setting4_005.nd2	2	Kc FISH_X and 2L_Cap-H2-eGFP_100x_512setting3_002.nd2	2	Kc FISH_X and 2L_Cap-H2-MBM-eGFP_100x_512setting5_004.nd2	1	Kc FISH_X and 2L_Cap-H2-MBM-eGFP_100x_512setting5_003.nd2	3	Kc FISH_X and 2L_CapH2-dC23-eGFP_100x_512_008.nd2	1	Kc FISH_X and 2L_CapH2-dC23-eGFP_100x_512_008.nd2	2	Kc FISH_x Cy3_2L 488_dC23-MBMrep1_condition1_001.nd2	2	Kc FISH_x Cy3_2L 488_dC23-MBMrep1_condition2_006.nd2	2
Kc FISH_X and 2L_pMT-eGFP_100x_512setting2_008.nd2	3	Kc FISH_X and 2L_pMT-eGFP_100x_512setting2_009.nd2	1	Kc FISH_X and 2L_Cap-H2-eGFP_100x_512setting2_006.nd2	1	Kc FISH_X and 2L_Cap-H2-eGFP_100x_512setting3_001.nd2	2	Kc FISH_X and 2L_Cap-H2-MBM-eGFP_100x_512setting5_003.nd2	1	Kc FISH_X and 2L_Cap-H2-MBM-eGFP_100x_512setting5_005.nd2	2	Kc FISH_X and 2L_CapH2-dC23-eGFP_100x_setting2_003.nd2	1	Kc FISH_X and 2L_CapH2-dC23-eGFP_100x_512_007.nd2	2	Kc FISH_x Cy3_2L 488_dC23-MBMrep1_condition2_007.nd2	1	Kc FISH_x Cy3_2L 488_dC23-MBMrep1_condition2_005.nd2	2
Kc FISH_X and 2L_pMT-eGFP_100x_512setting3_011.nd2	1	Kc FISH_X and 2L_pMT-eGFP_100x_512setting2_009.nd2	2	Kc FISH_X and 2L_Cap-H2-eGFP_100x_512setting3_003.nd2	1	Kc FISH_X and 2L_Cap-H2-eGFP_100x_512setting3_003.nd2	2	Kc FISH_X and 2L_Cap-H2-MBM-eGFP_100x_512setting1_001.nd2	2	Kc FISH_X and 2L_Cap-H2-MBM-eGFP_100x_512setting5_002.nd2	2	Kc FISH_X and 2L_CapH2-dC23-eGFP_100x_512setting2_011.nd2	1	Kc FISH_X and 2L_CapH2-dC23-eGFP_100x_512_009.nd2	1	Kc FISH_x Cy3_2L 488_dC23-MBMrep1_condition2_004.nd2	1	Kc FISH_x Cy3_2L 488_dC23-MBMrep1_condition2_005.nd2	1
Kc FISH_X and 2L_pMT-eGFP_100x_512setting2_009.nd2	2	Kc FISH_X and 2L_pMT-eGFP_100x_512setting2_009.nd2	1	Kc FISH_X and 2L_Cap-H2-eGFP_100x_512setting3_002.nd2	1	Kc FISH_X and 2L_Cap-H2-eGFP_100x_512setting4_005.nd2	3	Kc FISH_X and 2L_Cap-H2-MBM-eGFP_100x_512setting5_006.nd2	2	Kc FISH_X and 2L_Cap-H2-MBM-eGFP_100x_512setting5_005.nd2	2	Kc FISH_X and 2L_CapH2-dC23-eGFP_100x_setting3_004.nd2	2	Kc FISH_X and 2L_CapH2-dC23-eGFP_100x_setting2_003.nd2	2	Kc FISH_x Cy3_2L 488_dC23-MBMrep1_condition2_008.nd2	2	Kc FISH_x Cy3_2L 488_dC23-MBMrep1_condition2_005.nd2	1
Kc FISH_X and 2L_pMT-eGFP_100x_512setting2_009.nd2	2	Kc FISH_X and 2L_pMT-eGFP_100x_512setting2_009.nd2	2	Kc FISH_X and 2L_Cap-H2-eGFP_100x_512setting3_003.nd2	2	Kc FISH_X and 2L_Cap-H2-eGFP_100x_512setting4_004.nd2	2	Kc FISH_X and 2L_Cap-H2-MBM-eGFP_100x_512setting5_006.nd2	2	Kc FISH_X and 2L_Cap-H2-MBM-eGFP_100x_512setting1_001.nd2	1	Kc FISH_X and 2L_CapH2-dC23-eGFP_100x_512setting2_011.nd2	3	Kc FISH_X and 2L_CapH2-dC23-eGFP_100x_setting3_004.nd2	2	Kc FISH_x Cy3_2L 488_dC23-MBMrep1_condition1_001.nd2	2	Kc FISH_x Cy3_2L 488_dC23-MBMrep1_condition2_004.nd2	2
Kc FISH_X and 2L_pMT-eGFP_100x_512setting2_009.nd2	1	Kc FISH_X and 2L_pMT-eGFP_100x_512setting2_009.nd2	1	Kc FISH_X and 2L_Cap-H2-eGFP_100x_512setting3_003.nd2	2	Kc FISH_X and 2L_Cap-H2-eGFP_100x_512setting2_006.nd2	1	Kc FISH_X and 2L_Cap-H2-MBM-eGFP_100x_512setting5_003.nd2	1	Kc FISH_X and 2L_Cap-H2-MBM-eGFP_100x_512setting1_001.nd2	2	Kc FISH_X and 2L_CapH2-dC23-eGFP_100x_setting1_002.nd2	3	Kc FISH_X and 2L_CapH2-dC23-eGFP_100x_512setting2_010.nd2	2	Kc FISH_x Cy3_2L 488_dC23-MBMrep1_condition1_002.nd2	1	Kc FISH_x Cy3_2L 488_dC23-MBMrep1_condition2_007.nd2	2
Kc FISH_X and 2L_pMT-eGFP_100x_512setting2_009.nd2	1	Kc FISH_X and 2L_pMT-eGFP_100x_512setting2_009.nd2	2	Kc FISH_X and 2L_Cap-H2-eGFP_100x_512setting2_006.nd2	2	Kc FISH_X and 2L_Cap-H2-eGFP_100x_512setting3_001.nd2	1	Kc FISH_X and 2L_Cap-H2-MBM-eGFP_100x_512setting5_002.nd2	1	Kc FISH_X and 2L_Cap-H2-MBM-eGFP_100x_512setting5_006.nd2	1	Kc FISH_X and 2L_CapH2-dC23-eGFP_100x_setting2_003.nd2	1	Kc FISH_X and 2L_CapH2-dC23-eGFP_100x_512setting2_010.nd2	4	Kc FISH_x Cy3_2L 488_dC23-MBMrep1_condition2_009.nd2	2	Kc FISH_x Cy3_2L 488_dC23-MBMrep1_condition1_001.nd2	2
Kc FISH_X and 2L_pMT-eGFP_100x_512setting1_010.nd2	2	Kc FISH_X and 2L_pMT-eGFP_100x_512setting2_008.nd2	2	Kc FISH_X and 2L_Cap-H2-eGFP_100x_512setting4_004.nd2	1	Kc FISH_X and 2L_Cap-H2-eGFP_100x_512setting4_005.nd2	2	Kc FISH_X and 2L_Cap-H2-MBM-eGFP_100x_512setting5_006.nd2	2	Kc FISH_X and 2L_Cap-H2-MBM-eGFP_100x_512setting5_004.nd2	2	Kc FISH_X and 2L_CapH2-dC23-eGFP_100x_512setting2_010.nd2	3	Kc FISH_X and 2L_CapH2-dC23-eGFP_100x_setting2_003.nd2	3	Kc FISH_x Cy3_2L 488_dC23-MBMrep1_condition2_008.nd2	1	Kc FISH_x Cy3_2L 488_dC23-MBMrep1_condition2_007.nd2	2
Kc FISH_X and 2L_pMT-eGFP_100x_512setting3_011.nd2	1	Kc FISH_X and 2L_pMT-eGFP_100x_512setting2_008.nd2	1	Kc FISH_X and 2L_Cap-H2-eGFP_100x_512setting3_002.nd2	2	Kc FISH_X and 2L_Cap-H2-eGFP_100x_512setting3_003.nd2	3	Kc FISH_X and 2L_Cap-H2-MBM-eGFP_100x_512setting5_003.nd2	1	Kc FISH_X and 2L_Cap-H2-MBM-eGFP_100x_512setting5_006.nd2	2	Kc FISH_X and 2L_CapH2-dC23-eGFP_100x_setting2_003.nd2	1	Kc FISH_X and 2L_CapH2-dC23-eGFP_100x_512_009.nd2	1	Kc FISH_x Cy3_2L 488_dC23-MBMrep1_condition2_003.nd2	2	Kc FISH_x Cy3_2L 488_dC23-MBMrep1_condition2_003.nd2	1
Kc FISH_X and 2L_pMT-eGFP_100x_512setting3_011.nd2	1	Kc FISH_X and 2L_pMT-eGFP_100x_512setting2_008.nd2	1	Kc FISH_X and 2L_Cap-H2-eGFP_100x_512setting3_003.nd2	1	Kc FISH_X and 2L_Cap-H2-eGFP_100x_512setting3_001.nd2	2	Kc FISH_X and 2L_Cap-H2-MBM-eGFP_100x_512setting5_002.nd2	1	Kc FISH_X and 2L_Cap-H2-MBM-eGFP_100x_512setting5_005.nd2	1	Kc FISH_X and 2L_CapH2-dC23-eGFP_100x_setting3_004.nd2	2	Kc FISH_X and 2L_CapH2-dC23-eGFP_100x_512setting2_011.nd2	1	Kc FISH_x Cy3_2L 488_dC23-MBMrep1_condition2_008.nd2	1	Kc FISH_x Cy3_2L 488_dC23-MBMrep1_condition2_008.nd2	1
Kc FISH_X and 2L_pMT-eGFP_100x_512setting2_009.nd2	2	Kc FISH_X and 2L_pMT-eGFP_100x_512setting2_008.nd2	1	Kc FISH_X and 2L_Cap-H2-eGFP_100x_512setting3_002.nd2	1	Kc FISH_X and 2L_Cap-H2-eGFP_100x_512setting3_003.nd2	2	Kc FISH_X and 2L_Cap-H2-MBM-eGFP_100x_512setting5_005.nd2	1	Kc FISH_X and 2L_Cap-H2-MBM-eGFP_100x_512setting5_002.nd2	1	Kc FISH_X and 2L_CapH2-dC23-eGFP_100x_setting3_006.nd2	3	Kc FISH_X and 2L_CapH2-dC23-eGFP_100x_512setting2_011.nd2	1	Kc FISH_x Cy3_2L 488_dC23-MBMrep1_condition2_007.nd2	1	Kc FISH_x Cy3_2L 488_dC23-MBMrep1_condition2_008.nd2	1
Kc FISH_X and 2L_pMT-eGFP_100x_512setting2_009.nd2	3	Kc FISH_X and 2L_pMT-eGFP_100x_512setting2_008.nd2	2	Kc FISH_X and 2L_Cap-H2-eGFP_100x_512setting3_001.nd2	1	Kc FISH_X and 2L_Cap-H2-eGFP_100x_512setting2_006.nd2	1	Kc FISH_X and 2L_Cap-H2-MBM-eGFP_100x_512setting5_006.nd2	1	Kc FISH_X and 2L_Cap-H2-MBM-eGFP_100x_512setting5_004.nd2	1	Kc FISH_X and 2L_CapH2-dC23-eGFP_100x_512setting2_011.nd2	2	Kc FISH_X and 2L_CapH2-dC23-eGFP_100x_512_009.nd2	1	Kc FISH_x Cy3_2L 488_dC23-MBMrep1_condition2_006.nd2	1	Kc FISH_x Cy3_2L 488_dC23-MBMrep1_condition2_009.nd2	1
Kc FISH_X and 2L_pMT-eGFP_100x_512setting2_009.nd2	1	Kc FISH_X and 2L_pMT-eGFP_100x_512setting2_008.nd2	1	Kc FISH_X and 2L_Cap-H2-eGFP_100x_512setting3_002.nd2	1	Kc FISH_X and 2L_Cap-H2-eGFP_100x_512setting4_005.nd2	2	Kc FISH_X and 2L_Cap-H2-MBM-eGFP_100x_512setting5_003.nd2	1	Kc FISH_X and 2L_Cap-H2-MBM-eGFP_100x_512setting5_004.nd2	1	Kc FISH_X and 2L_CapH2-dC23-eGFP_100x_512_009.nd2	2	Kc FISH_X and 2L_CapH2-dC23-eGFP_100x_setting1_002.nd2	2	Kc FISH_x Cy3_2L 488_dC23-MBMrep1_condition2_005.nd2	1	Kc FISH_x Cy3_2L 488_dC23-MBMrep1_condition2_006.nd2	2
Kc FISH_X and 2L_pMT-eGFP_100x_512setting3_011.nd2	1	Kc FISH_X and 2L_pMT-eGFP_100x_512setting2_008.nd2	2	Kc FISH_X and 2L_Cap-H2-eGFP_100x_512setting2_007.nd2	2	Kc FISH_X and 2L_Cap-H2-eGFP_100x_512setting3_002.nd2	2	Kc FISH_X and 2L_Cap-H2-MBM-eGFP_100x_512setting5_005.nd2	3	Kc FISH_X and 2L_Cap-H2-MBM-eGFP_100x_512setting1_001.nd2	2	Kc FISH_X and 2L_CapH2-dC23-eGFP_100x_setting2_003.nd2	2	Kc FISH_X and 2L_CapH2-dC23-eGFP_100x_512_009.nd2	3	Kc FISH_x Cy3_2L 488_dC23-MBMrep1_condition2_009.nd2	1	Kc FISH_x Cy3_2L 488_dC23-MBMrep1_condition2_004.nd2	2
Kc FISH_X and 2L_pMT-eGFP_100x_512setting2_009.nd2	2	Kc FISH_X and 2L_pMT-eGFP_100x_512setting2_008.nd2	1	Kc FISH_X and 2L_Cap-H2-eGFP_100x_512setting2_007.nd2	2	Kc FISH_X and 2L_Cap-H2-eGFP_100x_512setting2_006.nd2	2	Kc FISH_X and 2L_Cap-H2-MBM-eGFP_100x_512setting5_003.nd2	2	Kc FISH_X and 2L_Cap-H2-MBM-eGFP_100x_512setting5_005.nd2	2	Kc FISH_X and 2L_CapH2-dC23-eGFP_100x_512_007.nd2	2	Kc FISH_X and 2L_CapH2-dC23-eGFP_100x_setting3_004.nd2	2	Kc FISH_x Cy3_2L 488_dC23-MBMrep1_condition2_004.nd2	2	Kc FISH_x Cy3_2L 488_dC23-MBMrep1_condition2_003.nd2	3
Kc FISH_X and 2L_pMT-eGFP_100x_512setting3_011.nd2	1	Kc FISH_X and 2L_pMT-eGFP_100x_512setting2_008.nd2	1	Kc FISH_X and 2L_Cap-H2-eGFP_100x_512setting3_003.nd2	2	Kc FISH_X and 2L_Cap-H2-eGFP_100x_512setting4_004.nd2	2	Kc FISH_X and 2L_Cap-H2-MBM-eGFP_100x_512setting5_006.nd2	2	Kc FISH_X and 2L_Cap-H2-MBM-eGFP_100x_512setting5_002.nd2	2	Kc FISH_X and 2L_CapH2-dC23-eGFP_100x_512setting2_011.nd2	2	Kc FISH_X and 2L_CapH2-dC23-eGFP_100x_setting2_003.nd2	1	Kc FISH_x Cy3_2L 488_dC23-MBMrep1_condition2_003.nd2	2	Kc FISH_x Cy3_2L 488_dC23-MBMrep1_condition2_006.nd2	1
Kc FISH_X and 2L_pMT-eGFP_100x_512setting2_009.nd2	2	Kc FISH_X and 2L_pMT-eGFP_100x_512setting2_008.nd2	2	Kc FISH_X and 2L_Cap-H2-eGFP_100x_512setting4_005.nd2	2	Kc FISH_X and 2L_Cap-H2-eGFP_100x_512setting4_004.nd2	2	Kc FISH_X and 2L_Cap-H2-MBM-eGFP_100x_512setting5_003.nd2	3	Kc FISH_X and 2L_Cap-H2-MBM-eGFP_100x_512setting5_003.nd2	2	Kc FISH_X and 2L_CapH2-dC23-eGFP_100x_setting2_003.nd2	2	Kc FISH_X and 2L_CapH2-dC23-eGFP_100x_setting3_005.nd2	2	Kc FISH_x Cy3_2L 488_dC23-MBMrep1_condition1_001.nd2	2	Kc FISH_x Cy3_2L 488_dC23-MBMrep1_condition2_003.nd2	1
Kc FISH_X and 2L_pMT-eGFP_100x_512setting1_010.nd2	2	Kc FISH_X and 2L_pMT-eGFP_100x_512setting3_011.nd2	1	Kc FISH_X and 2L_Cap-H2-eGFP_100x_512setting3_002.nd2	2	Kc FISH_X and 2L_Cap-H2-eGFP_100x_512setting3_003.nd2	1	Kc FISH_X and 2L_Cap-H2-MBM-eGFP_100x_512setting1_001.nd2	1	Kc FISH_X and 2L_Cap-H2-MBM-eGFP_100x_512setting5_003.nd2	3	Kc FISH_X and 2L_CapH2-dC23-eGFP_100x_512setting2_011.nd2	1	Kc FISH_X and 2L_CapH2-dC23-eGFP_100x_setting3_006.nd2	3	Kc FISH_x Cy3_2L 488_dC23-MBMrep1_condition2_007.nd2	2	Kc FISH_x Cy3_2L 488_dC23-MBMrep1_condition1_001.nd2	2
Kc FISH_X and 2L_pMT-eGFP_100x_512setting1_010.nd2	2	Kc FISH_X and 2L_pMT-eGFP_100x_512setting3_011.nd2	2	Kc FISH_X and 2L_Cap-H2-eGFP_100x_512setting2_007.nd2	1	Kc FISH_X and 2L_Cap-H2-eGFP_100x_512setting2_007.nd2	1	Kc FISH_X and 2L_Cap-H2-MBM-eGFP_100x_512setting5_004.nd2	2	Kc FISH_X and 2L_Cap-H2-MBM-eGFP_100x_512setting1_001.nd2	2	Kc FISH_X and 2L_CapH2-dC23-eGFP_100x_setting3_004.nd2	2	Kc FISH_X and 2L_CapH2-dC23-eGFP_100x_512_007.nd2	1	Kc FISH_x Cy3_2L 488_dC23-MBMrep1_condition2_008.nd2	2	Kc FISH_x Cy3_2L 488_dC23-MBMrep1_condition2_005.nd2	2
Kc FISH_X and 2L_pMT-eGFP_100x_512setting1_010.nd2	1	Kc FISH_X and 2L_pMT-eGFP_100x_512setting3_011.nd2	1	Kc FISH_X and 2L_Cap-H2-eGFP_100x_512setting3_001.nd2	1	Kc FISH_X and 2L_Cap-H2-eGFP_100x_512setting3_002.nd2	2	Kc FISH_X and 2L_Cap-H2-MBM-eGFP_100x_512setting5_004.nd2	1	Kc FISH_X and 2L_Cap-H2-MBM-eGFP_100x_512setting1_001.nd2	1	Kc FISH_X and 2L_CapH2-dC23-eGFP_100x_512_007.nd2	2	Kc FISH_X and 2L_CapH2-dC23-eGFP_100x_512_008.nd2	1	Kc FISH_x Cy3_2L 488_dC23-MBMrep1_condition2_004.nd2	2	Kc FISH_x Cy3_2L 488_dC23-MBMrep1_condition2_007.nd2	1
Kc FISH_X and 2L_pMT-eGFP_100x_512setting2_008.nd2	2	Kc FISH_X and 2L_pMT-eGFP_100x_512setting3_011.nd2	1	Kc FISH_X and 2L_Cap-H2-eGFP_100x_512setting3_002.nd2	1	Kc FISH_X and 2L_Cap-H2-eGFP_100x_512setting3_003.nd2	2	Kc FISH_X and 2L_Cap-H2-MBM-eGFP_100x_512setting5_004.nd2	2	Kc FISH_X and 2L_Cap-H2-MBM-eGFP_100x_512setting5_006.nd2	1	Kc FISH_X and 2L_CapH2-dC23-eGFP_100x_512setting2_011.nd2	2	Kc FISH_X and 2L_CapH2-dC23-eGFP_100x_setting3_006.nd2	2	Kc FISH_x Cy3_2L 488_dC23-MBMrep1_condition2_008.nd2	2	Kc FISH_x Cy3_2L 488_dC23-MBMrep1_condition2_008.nd2	2
Kc FISH_X and 2L_pMT-eGFP_100x_512setting1_010.nd2	2	Kc FISH_X and 2L_pMT-eGFP_100x_512setting3_011.nd2	1	Kc FISH_X and 2L_Cap-H2-eGFP_100x_512setting4_005.nd2	1	Kc FISH_X and 2L_Cap-H2-eGFP_100x_512setting2_006.nd2	2	Kc FISH_X and 2L_Cap-H2-MBM-eGFP_100x_512setting5_004.nd2	2	Kc FISH_X and 2L_Cap-H2-MBM-eGFP_100x_512setting1_001.nd2	2	Kc FISH_X and 2L_CapH2-dC23-eGFP_100x_512_008.nd2	1	Kc FISH_X and 2L_CapH2-dC23-eGFP_100x_setting3_004.nd2	1	Kc FISH_x Cy3_2L 488_dC23-MBMrep1_condition2_006.nd2	1	Kc FISH_x Cy3_2L 488_dC23-MBMrep1_condition1_002.nd2	2
Kc FISH_X and 2L_pMT-eGFP_100x_512setting2_009.nd2	1	Kc FISH_X and 2L_pMT-eGFP_100x_512setting3_011.nd2	3	Kc FISH_X and 2L_Cap-H2-eGFP_100x_512setting4_004.nd2	1	Kc FISH_X and 2L_Cap-H2-eGFP_100x_512setting2_007.nd2	1	Kc FISH_X and 2L_Cap-H2-MBM-eGFP_100x_512setting5_003.nd2	1	Kc FISH_X and 2L_Cap-H2-MBM-eGFP_100x_512setting5_005.nd2	1	Kc FISH_X and 2L_CapH2-dC23-eGFP_100x_setting1_002.nd2	1	Kc FISH_X and 2L_CapH2-dC23-eGFP_100x_setting2_003.nd2	3	Kc FISH_x Cy3_2L 488_dC23-MBMrep1_condition2_009.nd2	2	Kc FISH_x Cy3_2L 488_dC23-MBMrep1_condition2_005.nd2	2
Kc FISH_X and 2L_pMT-eGFP_100x_512setting3_011.nd2	1	Kc FISH_X and 2L_pMT-eGFP_100x_512setting3_011.nd2	3	Kc FISH_X and 2L_Cap-H2-eGFP_100x_512setting2_007.nd2	4	Kc FISH_X and 2L_Cap-H2-eGFP_100x_512setting4_005.nd2	3	Kc FISH_X and 2L_Cap-H2-MBM-eGFP_100x_512setting5_006.nd2	1	Kc FISH_X and 2L_Cap-H2-MBM-eGFP_100x_512setting5_006.nd2	1	Kc FISH_X and 2L_CapH2-dC23-eGFP_100x_setting2_003.nd2	2	Kc FISH_X and 2L_CapH2-dC23-eGFP_100x_setting3_004.nd2	2	Kc FISH_x Cy3_2L 488_dC23-MBMrep1_condition2_006.nd2	3	Kc FISH_x Cy3_2L 488_dC23-MBMrep1_condition2_008.nd2	1
Kc FISH_X and 2L_pMT-eGFP_100x_512setting1_010.nd2	1	Kc FISH_X and 2L_pMT-eGFP_100x_512setting3_011.nd2	2	Kc FISH_X and 2L_Cap-H2-eGFP_100x_512setting3_001.nd2	3	Kc FISH_X and 2L_Cap-H2-eGFP_100x_512setting4_004.nd2	1	Kc FISH_X and 2L_Cap-H2-MBM-eGFP_100x_512setting5_006.nd2	2	Kc FISH_X and 2L_Cap-H2-MBM-eGFP_100x_512setting5_002.nd2	2	Kc FISH_X and 2L_CapH2-dC23-eGFP_100x_setting3_005.nd2	2	Kc FISH_X and 2L_CapH2-dC23-eGFP_100x_setting2_003.nd2	2	Kc FISH_x Cy3_2L 488_dC23-MBMrep1_condition2_006.nd2	2	Kc FISH_x Cy3_2L 488_dC23-MBMrep1_condition2_008.nd2	1
Kc FISH_X and 2L_pMT-eGFP_100x_512setting3_011.nd2	1	Kc FISH_X and 2L_pMT-eGFP_100x_512setting3_011.nd2	1	Kc FISH_X and 2L_Cap-H2-eGFP_100x_512setting2_006.nd2	2	Kc FISH_X and 2L_Cap-H2-eGFP_100x_512setting3_001.nd2	1	Kc FISH_X and 2L_Cap-H2-MBM-eGFP_100x_512setting5_002.nd2	1	Kc FISH_X and 2L_Cap-H2-MBM-eGFP_100x_512setting5_004.nd2	1	Kc FISH_X and 2L_CapH2-dC23-eGFP_100x_512_007.nd2	1	Kc FISH_X and 2L_CapH2-dC23-eGFP_100x_512_009.nd2	1	Kc FISH_x Cy3_2L 488_dC23-MBMrep1_condition2_008.nd2	2	Kc FISH_x Cy3_2L 488_dC23-MBMrep1_condition1_002.nd2	3
Kc FISH_X and 2L_pMT-eGFP_100x_512setting3_011.nd2	2	Kc FISH_X and 2L_pMT-eGFP_100x_512setting3_011.nd2	1	Kc FISH_X and 2L_Cap-H2-eGFP_100x_512setting4_004.nd2	1	Kc FISH_X and 2L_Cap-H2-eGFP_100x_512setting3_003.nd2	1	Kc FISH_X and 2L_Cap-H2-MBM-eGFP_100x_512setting5_002.nd2	1	Kc FISH_X and 2L_Cap-H2-MBM-eGFP_100x_512setting5_006.nd2	1	Kc FISH_X and 2L_CapH2-dC23-eGFP_100x_setting3_004.nd2	1	Kc FISH_X and 2L_CapH2-dC23-eGFP_100x_setting3_004.nd2	1	Kc FISH_x Cy3_2L 488_dC23-MBMrep1_condition2_005.nd2	2	Kc FISH_x Cy3_2L 488_dC23-MBMrep1_condition2_009.nd2	1
Kc FISH_X and 2L_pMT-eGFP_100x_512setting2_009.nd2	2	Kc FISH_X and 2L_pMT-eGFP_100x_512setting3_011.nd2	3	Kc FISH_X and 2L_Cap-H2-eGFP_100x_512setting4_005.nd2	1	Kc FISH_X and 2L_Cap-H2-eGFP_100x_512setting4_004.nd2	2	Kc FISH_X and 2L_Cap-H2-MBM-eGFP_100x_512setting5_005.nd2	1	Kc FISH_X and 2L_Cap-H2-MBM-eGFP_100x_512setting5_005.nd2	1	Kc FISH_X and 2L_CapH2-dC23-eGFP_100x_512setting2_011.nd2	3	Kc FISH_X and 2L_CapH2-dC23-eGFP_100x_512_008.nd2	1	Kc FISH_x Cy3_2L 488_dC23-MBMrep1_condition2_008.nd2	2	Kc FISH_x Cy3_2L 488_dC23-MBMrep1_condition2_006.nd2	1
Kc FISH_X and 2L_pMT-eGFP_100x_512setting2_008.nd2	2	Kc FISH_X and 2L_pMT-eGFP_100x_512setting3_011.nd2	1	Kc FISH_X and 2L_Cap-H2-eGFP_100x_512setting4_005.nd2	3	Kc FISH_X and 2L_Cap-H2-eGFP_100x_512setting2_006.nd2	2	Kc FISH_X and 2L_Cap-H2-MBM-eGFP_100x_512setting5_005.nd2	2	Kc FISH_X and 2L_Cap-H2-MBM-eGFP_100x_512setting5_006.nd2	2	Kc FISH_X and 2L_CapH2-dC23-eGFP_100x_setting3_005.nd2	2	Kc FISH_X and 2L_CapH2-dC23-eGFP_100x_512setting2_010.nd2	2	Kc FISH_x Cy3_2L 488_dC23-MBMrep1_condition2_005.nd2	1	Kc FISH_x Cy3_2L 488_dC23-MBMrep1_condition2_003.nd2	2
Kc FISH_X and 2L_pMT-eGFP_100x_512setting1_010.nd2	2	Kc FISH_X and 2L_pMT-eGFP_100x_512setting3_011.nd2	1	Kc FISH_X and 2L_Cap-H2-eGFP_100x_512setting3_001.nd2	1	Kc FISH_X and 2L_Cap-H2-eGFP_100x_512setting2_006.nd2	3	Kc FISH_X and 2L_Cap-H2-MBM-eGFP_100x_512setting5_006.nd2	2	Kc FISH_X and 2L_Cap-H2-MBM-eGFP_100x_512setting5_003.nd2	1	Kc FISH_X and 2L_CapH2-dC23-eGFP_100x_setting3_004.nd2	2	Kc FISH_X and 2L_CapH2-dC23-eGFP_100x_512setting2_011.nd2	2	Kc FISH_x Cy3_2L 488_dC23-MBMrep1_condition2_007.nd2	2	Kc FISH_x Cy3_2L 488_dC23-MBMrep1_condition2_008.nd2	1
Kc FISH_X and 2L_pMT-eGFP_100x_512setting1_010.nd2	2	Kc FISH_X and 2L_pMT-eGFP_100x_512setting3_011.nd2	1	Kc FISH_X and 2L_Cap-H2-eGFP_100x_512setting3_001.nd2	1	Kc FISH_X and 2L_Cap-H2-eGFP_100x_512setting4_005.nd2	1	Kc FISH_X and 2L_Cap-H2-MBM-eGFP_100x_512setting5_002.nd2	1	Kc FISH_X and 2L_Cap-H2-MBM-eGFP_100x_512setting5_003.nd2	1	Kc FISH_X and 2L_CapH2-dC23-eGFP_100x_512setting2_010.nd2	4	Kc FISH_X and 2L_CapH2-dC23-eGFP_100x_512_009.nd2	2	Kc FISH_x Cy3_2L 488_dC23-MBMrep1_condition2_004.nd2	2	Kc FISH_x Cy3_2L 488_dC23-MBMrep1_condition2_005.nd2	2
Kc FISH_X and 2L_pMT-eGFP_100x_512setting1_010.nd2	2	Kc FISH_X and 2L_pMT-eGFP_100x_512setting3_011.nd2	3	Kc FISH_X and 2L_Cap-H2-eGFP_100x_512setting3_003.nd2	3	Kc FISH_X and 2L_Cap-H2-eGFP_100x_512setting4_005.nd2	1	Kc FISH_X and 2L_Cap-H2-MBM-eGFP_100x_512setting5_003.nd2	2	Kc FISH_X and 2L_Cap-H2-MBM-eGFP_100x_512setting1_001.nd2	2	Kc FISH_X and 2L_CapH2-dC23-eGFP_100x_setting2_003.nd2	1	Kc FISH_X and 2L_CapH2-dC23-eGFP_100x_512_009.nd2	2	Kc FISH_x Cy3_2L 488_dC23-MBMrep1_condition2_005.nd2	1	Kc FISH_x Cy3_2L 488_dC23-MBMrep1_condition2_006.nd2	3
Kc FISH_X and 2L_pMT-eGFP_100x_512setting3_011.nd2	1	Kc FISH_x Cy3_2L 488_pMT-GFP_rep3_condition1_005.nd2	2	Kc FISH_X and 2L_Cap-H2-eGFP_100x_512setting3_003.nd2	2	Kc FISH_X and 2L_Cap-H2-eGFP_100x_512setting3_002.nd2	2	Kc FISH_X and 2L_Cap-H2-MBM-eGFP_100x_512setting5_002.nd2	1	Kc FISH_X and 2L_Cap-H2-MBM-eGFP_100x_512setting5_004.nd2	1	Kc FISH_X and 2L_CapH2-dC23-eGFP_100x_setting3_004.nd2	1	Kc FISH_X and 2L_CapH2-dC23-eGFP_100x_512setting2_010.nd2	1	Kc FISH_x Cy3_2L 488_dC23-MBMrep1_condition2_009.nd2	1	Kc FISH_x Cy3_2L 488_dC23-MBMrep1_condition2_009.nd2	1
Kc FISH_X and 2L_pMT-eGFP_100x_512setting1_010.nd2	1	Kc FISH_x Cy3_2L 488_pMT-GFP_rep3_condition1_005.nd2	1	Kc FISH_X and 2L_Cap-H2-eGFP_100x_512setting2_006.nd2	3	Kc FISH_X and 2L_Cap-H2-eGFP_100x_512setting2_006.nd2	3	Kc FISH_X and 2L_Cap-H2-MBM-eGFP_100x_512setting5_004.nd2	2	Kc FISH_X and 2L_Cap-H2-MBM-eGFP_100x_512setting5_002.nd2	2	Kc FISH_X and 2L_CapH2-dC23-eGFP_100x_512setting2_011.nd2	3	Kc FISH_X and 2L_CapH2-dC23-eGFP_100x_setting1_002.nd2	1	Kc FISH_x Cy3_2L 488_dC23-MBMrep1_condition2_009.nd2	1	Kc FISH_x Cy3_2L 488_dC23-MBMrep1_condition2_007.nd2	1
Kc FISH_X and 2L_pMT-eGFP_100x_512setting2_008.nd2	2	Kc FISH_x Cy3_2L 488_pMT-GFP_rep3_condition1_005.nd2	1	Kc FISH_X and 2L_Cap-H2-eGFP_100x_512setting4_004.nd2	2	Kc FISH_X and 2L_Cap-H2-eGFP_100x_512setting3_003.nd2	1	Kc FISH_X and 2L_Cap-H2-MBM-eGFP_100x_512setting5_003.nd2	2	Kc FISH_X and 2L_Cap-H2-MBM-eGFP_100x_512setting5_005.nd2	2	Kc FISH_X and 2L_CapH2-dC23-eGFP_100x_setting3_006.nd2	2	Kc FISH_X and 2L_CapH2-dC23-eGFP_100x_setting3_005.nd2	1	Kc FISH_x Cy3_2L 488_dC23-MBMrep1_condition1_001.nd2	1	Kc FISH_x Cy3_2L 488_dC23-MBMrep1_condition2_009.nd2	2
Kc FISH_x Cy3_2L 488_pMT-GFP_rep3_condition1_006.nd2	2	Kc FISH_x Cy3_2L 488_pMT-GFP_rep3_condition1_005.nd2	2	Kc FISH_x Cy3_2L 488_Cap-H2-GFP_rep3_condition1_002.nd2	3	Kc FISH_x Cy3_2L 488_Cap-H2-GFP_rep3_condition1_001.nd2	1	Kc FISH_x Cy3_2L 488_MBM_rep3_condition1_003.nd2	1	Kc FISH_x Cy3_2L 488_MBM_rep3_condition1_002.nd2	1	Kc FISH_x Cy3_2L 488_dC23rep3_condition2_007.nd2	2	Kc FISH_x Cy3_2L 488_dC23rep3_condition2_003.nd2	2	Kc FISH_x Cy3_2L 488_dC23-MBMrep3_condition1_001.nd2	1	Kc FISH_x Cy3_2L 488_dC23-MBMrep3_condition1_004.nd2	1
Kc FISH_x Cy3_2L 488_pMT-GFP_rep3_condition1_006.nd2	1	Kc FISH_x Cy3_2L 488_pMT-GFP_rep3_condition1_005.nd2	2	Kc FISH_x Cy3_2L 488_Cap-H2-GFP_rep3_condition1_002.nd2	2	Kc FISH_x Cy3_2L 488_Cap-H2-GFP_rep3_condition1_001.nd2	1	Kc FISH_x Cy3_2L 488_MBM_rep3_condition1_003.nd2	2	Kc FISH_x Cy3_2L 488_MBM_rep3_condition1_002.nd2	1	Kc FISH_x Cy3_2L 488_dC23rep3_condition2_004.nd2	1	Kc FISH_x Cy3_2L 488_dC23rep3_condition1_002.nd2	1	Kc FISH_x Cy3_2L 488_dC23-MBMrep3_condition1_009.nd2	2	Kc FISH_x Cy3_2L 488_dC23-MBMrep3_condition1_004.nd2	2
Kc FISH_x Cy3_2L 488_pMT-GFP_rep3_condition1_006.nd2	1	Kc FISH_x Cy3_2L 488_pMT-GFP_rep3_condition1_005.nd2	2	Kc FISH_x Cy3_2L 488_Cap-H2-GFP_rep3_condition1_002.nd2	1	Kc FISH_x Cy3_2L 488_Cap-H2-GFP_rep3_condition1_005.nd2	1	Kc FISH_x Cy3_2L 488_MBM_rep3_condition1_003.nd2	1	Kc FISH_x Cy3_2L 488_MBM_rep3_condition1_002.nd2	1	Kc FISH_x Cy3_2L 488_dC23rep3_condition2_007.nd2	2	Kc FISH_x Cy3_2L 488_dC23rep3_condition1_002.nd2	1	Kc FISH_x Cy3_2L 488_dC23-MBMrep3_condition1_007.nd2	1	Kc FISH_x Cy3_2L 488_dC23-MBMrep3_condition1_005.nd2	1
Kc FISH_x Cy3_2L 488_pMT-GFP_rep3_condition1_006.nd2	2	Kc FISH_x Cy3_2L 488_pMT-GFP_rep3_condition1_005.nd2	1	Kc FISH_x Cy3_2L 488_Cap-H2-GFP_rep3_condition1_002.nd2	2	Kc FISH_x Cy3_2L 488_Cap-H2-GFP_rep3_condition1_005.nd2	2	Kc FISH_x Cy3_2L 488_MBM_rep3_condition1_003.nd2	2	Kc FISH_x Cy3_2L 488_MBM_rep3_condition1_002.nd2	1	Kc FISH_x Cy3_2L 488_dC23rep3_condition2_004.nd2	4	Kc FISH_x Cy3_2L 488_dC23rep3_condition2_007.nd2	2	Kc FISH_x Cy3_2L 488_dC23-MBMrep3_condition1_003.nd2	2	Kc FISH_x Cy3_2L 488_dC23-MBMrep3_condition1_003.nd2	2
Kc FISH_x Cy3_2L 488_pMT-GFP_rep3_condition1_006.nd2	1	Kc FISH_x Cy3_2L 488_pMT-GFP_rep3_condition1_006.nd2	1	Kc FISH_x Cy3_2L 488_Cap-H2-GFP_rep3_condition1_002.nd2	1	Kc FISH_x Cy3_2L 488_Cap-H2-GFP_rep3_condition1_001.nd2	1	Kc FISH_x Cy3_2L 488_MBM_rep3_condition1_003.nd2	1	Kc FISH_x Cy3_2L 488_MBM_rep3_condition1_002.nd2	2	Kc FISH_x Cy3_2L 488_dC23rep3_condition1_002.nd2	1	Kc FISH_x Cy3_2L 488_dC23rep3_condition2_005.nd2	2	Kc FISH_x Cy3_2L 488_dC23-MBMrep3_condition1_004.nd2	2	Kc FISH_x Cy3_2L 488_dC23-MBMrep3_condition1_003.nd2	1
Kc FISH_x Cy3_2L 488_pMT-GFP_rep3_condition1_007.nd2	1	Kc FISH_x Cy3_2L 488_pMT-GFP_rep3_condition1_006.nd2	1	Kc FISH_x Cy3_2L 488_Cap-H2-GFP_rep3_condition1_002.nd2	3	Kc FISH_x Cy3_2L 488_Cap-H2-GFP_rep3_condition1_004.nd2	1	Kc FISH_x Cy3_2L 488_MBM_rep3_condition1_003.nd2	1	Kc FISH_x Cy3_2L 488_MBM_rep3_condition1_002.nd2	1	Kc FISH_x Cy3_2L 488_dC23rep3_condition2_005.nd2	1	Kc FISH_x Cy3_2L 488_dC23rep3_condition2_004.nd2	1	Kc FISH_x Cy3_2L 488_dC23-MBMrep3_condition1_005.nd2	2	Kc FISH_x Cy3_2L 488_dC23-MBMrep3_condition1_004.nd2	2
Kc FISH_x Cy3_2L 488_pMT-GFP_rep3_condition1_007.nd2	1	Kc FISH_x Cy3_2L 488_pMT-GFP_rep3_condition1_006.nd2	1	Kc FISH_x Cy3_2L 488_Cap-H2-GFP_rep3_condition1_003.nd2	2	Kc FISH_x Cy3_2L 488_Cap-H2-GFP_rep3_condition1_001.nd2	2	Kc FISH_x Cy3_2L 488_MBM_rep3_condition1_002.nd2	1	Kc FISH_x Cy3_2L 488_MBM_rep3_condition1_002.nd2	2	Kc FISH_x Cy3_2L 488_dC23rep3_condition2_007.nd2	2	Kc FISH_x Cy3_2L 488_dC23rep3_condition1_001.nd2	3	Kc FISH_x Cy3_2L 488_dC23-MBMrep3_condition1_009.nd2	1	Kc FISH_x Cy3_2L 488_dC23-MBMrep3_condition1_003.nd2	1
Kc FISH_x Cy3_2L 488_pMT-GFP_rep3_condition1_007.nd2	1	Kc FISH_x Cy3_2L 488_pMT-GFP_rep3_condition1_006.nd2	1	Kc FISH_x Cy3_2L 488_Cap-H2-GFP_rep3_condition1_003.nd2	3	Kc FISH_x Cy3_2L 488_Cap-H2-GFP_rep3_condition1_005.nd2	2	Kc FISH_x Cy3_2L 488_MBM_rep3_condition1_002.nd2	1	Kc FISH_x Cy3_2L 488_MBM_rep3_condition1_002.nd2	2	Kc FISH_x Cy3_2L 488_dC23rep3_condition2_006.nd2	1	Kc FISH_x Cy3_2L 488_dC23rep3_condition2_006.nd2	2	Kc FISH_x Cy3_2L 488_dC23-MBMrep3_condition1_008.nd2	2	Kc FISH_x Cy3_2L 488_dC23-MBMrep3_condition1_003.nd2	1
Kc FISH_x Cy3_2L 488_pMT-GFP_rep3_condition1_007.nd2	2	Kc FISH_x Cy3_2L 488_pMT-GFP_rep3_condition1_006.nd2	1	Kc FISH_x Cy3_2L 488_Cap-H2-GFP_rep3_condition1_003.nd2	1	Kc FISH_x Cy3_2L 488_Cap-H2-GFP_rep3_condition1_003.nd2	1	Kc FISH_x Cy3_2L 488_MBM_rep3_condition1_002.nd2	1	Kc FISH_x Cy3_2L 488_MBM_rep3_condition1_001.nd2	2	Kc FISH_x Cy3_2L 488_dC23rep3_condition2_005.nd2	1	Kc FISH_x Cy3_2L 488_dC23rep3_condition1_002.nd2	1	Kc FISH_x Cy3_2L 488_dC23-MBMrep3_condition1_004.nd2	2	Kc FISH_x Cy3_2L 488_dC23-MBMrep3_condition1_002.nd2	2
Kc FISH_x Cy3_2L 488_pMT-GFP_rep3_condition1_007.nd2	1	Kc FISH_x Cy3_2L 488_pMT-GFP_rep3_condition1_007.nd2	1	Kc FISH_x Cy3_2L 488_Cap-H2-GFP_rep3_condition1_003.nd2	2	Kc FISH_x Cy3_2L 488_Cap-H2-GFP_rep3_condition1_001.nd2	2	Kc FISH_x Cy3_2L 488_MBM_rep3_condition1_002.nd2	2	Kc FISH_x Cy3_2L 488_MBM_rep3_condition1_001.nd2	2	Kc FISH_x Cy3_2L 488_dC23rep3_condition1_001.nd2	2	Kc FISH_x Cy3_2L 488_dC23rep3_condition2_006.nd2	1	Kc FISH_x Cy3_2L 488_dC23-MBMrep3_condition1_002.nd2	1	Kc FISH_x Cy3_2L 488_dC23-MBMrep3_condition1_005.nd2	2
Kc FISH_x Cy3_2L 488_pMT-GFP_rep3_condition1_007.nd2	2	Kc FISH_x Cy3_2L 488_pMT-GFP_rep3_condition1_007.nd2	1	Kc FISH_x Cy3_2L 488_Cap-H2-GFP_rep3_condition1_003.nd2	1	Kc FISH_x Cy3_2L 488_Cap-H2-GFP_rep3_condition1_003.nd2	1	Kc FISH_x Cy3_2L 488_MBM_rep3_condition1_002.nd2	1	Kc FISH_x Cy3_2L 488_MBM_rep3_condition1_001.nd2	2	Kc FISH_x Cy3_2L 488_dC23rep3_condition2_006.nd2	1	Kc FISH_x Cy3_2L 488_dC23rep3_condition2_007.nd2	3	Kc FISH_x Cy3_2L 488_dC23-MBMrep3_condition1_007.nd2	1	Kc FISH_x Cy3_2L 488_dC23-MBMrep3_condition1_002.nd2	2
Kc FISH_x Cy3_2L 488_pMT-GFP_rep3_condition1_007.nd2	2	Kc FISH_x Cy3_2L 488_pMT-GFP_rep3_condition1_007.nd2	2	Kc FISH_x Cy3_2L 488_Cap-H2-GFP_rep3_condition1_003.nd2	1	Kc FISH_x Cy3_2L 488_Cap-H2-GFP_rep3_condition1_003.nd2	3	Kc FISH_x Cy3_2L 488_MBM_rep3_condition1_002.nd2	1	Kc FISH_x Cy3_2L 488_MBM_rep3_condition1_001.nd2	2	Kc FISH_x Cy3_2L 488_dC23rep3_condition2_006.nd2	2	Kc FISH_x Cy3_2L 488_dC23rep3_condition2_006.nd2	2	Kc FISH_x Cy3_2L 488_dC23-MBMrep3_condition1_009.nd2	3	Kc FISH_x Cy3_2L 488_dC23-MBMrep3_condition1_003.nd2	1
Kc FISH_x Cy3_2L 488_pMT-GFP_rep3_condition1_008.nd2	1	Kc FISH_x Cy3_2L 488_pMT-GFP_rep3_condition1_007.nd2	2	Kc FISH_x Cy3_2L 488_Cap-H2-GFP_rep3_condition1_003.nd2	2	Kc FISH_x Cy3_2L 488_Cap-H2-GFP_rep3_condition1_004.nd2	2	Kc FISH_x Cy3_2L 488_MBM_rep3_condition1_002.nd2	2	Kc FISH_x Cy3_2L 488_MBM_rep3_condition1_001.nd2	2	Kc FISH_x Cy3_2L 488_dC23rep3_condition1_002.nd2	3	Kc FISH_x Cy3_2L 488_dC23rep3_condition1_001.nd2	1	Kc FISH_x Cy3_2L 488_dC23-MBMrep3_condition1_004.nd2	1	Kc FISH_x Cy3_2L 488_dC23-MBMrep3_condition1_009.nd2	1
Kc FISH_x Cy3_2L 488_pMT-GFP_rep3_condition1_008.nd2	2	Kc FISH_x Cy3_2L 488_pMT-GFP_rep3_condition1_007.nd2	1	Kc FISH_x Cy3_2L 488_Cap-H2-GFP_rep3_condition1_003.nd2	3	Kc FISH_x Cy3_2L 488_Cap-H2-GFP_rep3_condition1_001.nd2	1	Kc FISH_x Cy3_2L 488_MBM_rep3_condition1_002.nd2	2	Kc FISH_x Cy3_2L 488_MBM_rep3_condition1_001.nd2	1	Kc FISH_x Cy3_2L 488_dC23rep3_condition2_006.nd2	2	Kc FISH_x Cy3_2L 488_dC23rep3_condition1_002.nd2	1	Kc FISH_x Cy3_2L 488_dC23-MBMrep3_condition1_007.nd2	2	Kc FISH_x Cy3_2L 488_dC23-MBMrep3_condition1_008.nd2	2
Kc FISH_x Cy3_2L 488_pMT-GFP_rep3_condition1_008.nd2	1	Kc FISH_x Cy3_2L 488_pMT-GFP_rep3_condition1_007.nd2	2	Kc FISH_x Cy3_2L 488_Cap-H2-GFP_rep3_condition1_004.nd2	2	Kc FISH_x Cy3_2L 488_Cap-H2-GFP_rep3_condition1_001.nd2	1	Kc FISH_x Cy3_2L 488_MBM_rep3_condition1_001.nd2	2	Kc FISH_x Cy3_2L 488_MBM_rep3_condition1_001.nd2	2	Kc FISH_x Cy3_2L 488_dC23rep3_condition1_001.nd2	3	Kc FISH_x Cy3_2L 488_dC23rep3_condition1_001.nd2	1	Kc FISH_x Cy3_2L 488_dC23-MBMrep3_condition1_008.nd2	2	Kc FISH_x Cy3_2L 488_dC23-MBMrep3_condition1_001.nd2	1
Kc FISH_x Cy3_2L 488_pMT-GFP_rep3_condition1_008.nd2	1	Kc FISH_x Cy3_2L 488_pMT-GFP_rep3_condition1_007.nd2	1	Kc FISH_x Cy3_2L 488_Cap-H2-GFP_rep3_condition1_004.nd2	1	Kc FISH_x Cy3_2L 488_Cap-H2-GFP_rep3_condition1_004.nd2	2	Kc FISH_x Cy3_2L 488_MBM_rep3_condition1_001.nd2	1	Kc FISH_x Cy3_2L 488_MBM_rep3_condition1_001.nd2	2	Kc FISH_x Cy3_2L 488_dC23rep3_condition1_002.nd2	2	Kc FISH_x Cy3_2L 488_dC23rep3_condition2_005.nd2	3	Kc FISH_x Cy3_2L 488_dC23-MBMrep3_condition1_002.nd2	2	Kc FISH_x Cy3_2L 488_dC23-MBMrep3_condition1_007.nd2	2
Kc FISH_x Cy3_2L 488_pMT-GFP_rep3_condition1_008.nd2	1	Kc FISH_x Cy3_2L 488_pMT-GFP_rep3_condition1_008.nd2	1	Kc FISH_x Cy3_2L 488_Cap-H2-GFP_rep3_condition1_004.nd2	1	Kc FISH_x Cy3_2L 488_Cap-H2-GFP_rep3_condition1_003.nd2	3	Kc FISH_x Cy3_2L 488_MBM_rep3_condition1_001.nd2	1	Kc FISH_x Cy3_2L 488_MBM_rep3_condition1_001.nd2	1	Kc FISH_x Cy3_2L 488_dC23rep3_condition1_002.nd2	1	Kc FISH_x Cy3_2L 488_dC23rep3_condition2_007.nd2	2	Kc FISH_x Cy3_2L 488_dC23-MBMrep3_condition1_004.nd2	2	Kc FISH_x Cy3_2L 488_dC23-MBMrep3_condition1_002.nd2	1
Kc FISH_x Cy3_2L 488_pMT-GFP_rep3_condition1_001.nd2	2	Kc FISH_x Cy3_2L 488_pMT-GFP_rep3_condition1_008.nd2	2	Kc FISH_x Cy3_2L 488_Cap-H2-GFP_rep3_condition1_004.nd2	2	Kc FISH_x Cy3_2L 488_Cap-H2-GFP_rep3_condition1_001.nd2	2	Kc FISH_x Cy3_2L 488_MBM_rep3_condition1_001.nd2	1	Kc FISH_x Cy3_2L 488_MBM_rep3_condition1_006.nd2	2	Kc FISH_x Cy3_2L 488_dC23rep3_condition2_007.nd2	1	Kc FISH_x Cy3_2L 488_dC23rep3_condition2_004.nd2	2	Kc FISH_x Cy3_2L 488_dC23-MBMrep3_condition1_007.nd2	1	Kc FISH_x Cy3_2L 488_dC23-MBMrep3_condition1_005.nd2	1
Kc FISH_x Cy3_2L 488_pMT-GFP_rep3_condition1_001.nd2	2	Kc FISH_x Cy3_2L 488_pMT-GFP_rep3_condition1_008.nd2	2	Kc FISH_x Cy3_2L 488_Cap-H2-GFP_rep3_condition1_004.nd2	1	Kc FISH_x Cy3_2L 488_Cap-H2-GFP_rep3_condition1_001.nd2	1	Kc FISH_x Cy3_2L 488_MBM_rep3_condition1_001.nd2	1	Kc FISH_x Cy3_2L 488_MBM_rep3_condition1_006.nd2	1	Kc FISH_x Cy3_2L 488_dC23rep3_condition2_003.nd2	4	Kc FISH_x Cy3_2L 488_dC23rep3_condition1_002.nd2	1	Kc FISH_x Cy3_2L 488_dC23-MBMrep3_condition1_009.nd2	2	Kc FISH_x Cy3_2L 488_dC23-MBMrep3_condition1_005.nd2	2
Kc FISH_x Cy3_2L 488_pMT-GFP_rep3_condition1_001.nd2	2	Kc FISH_x Cy3_2L 488_pMT-GFP_rep3_condition1_008.nd2	2	Kc FISH_x Cy3_2L 488_Cap-H2-GFP_rep3_condition1_004.nd2	2	Kc FISH_x Cy3_2L 488_Cap-H2-GFP_rep3_condition1_001.nd2	1	Kc FISH_x Cy3_2L 488_MBM_rep3_condition1_001.nd2	2	Kc FISH_x Cy3_2L 488_MBM_rep3_condition1_006.nd2	1	Kc FISH_x Cy3_2L 488_dC23rep3_condition2_003.nd2	3	Kc FISH_x Cy3_2L 488_dC23rep3_condition2_003.nd2	1	Kc FISH_x Cy3_2L 488_dC23-MBMrep3_condition1_008.nd2	1	Kc FISH_x Cy3_2L 488_dC23-MBMrep3_condition1_001.nd2	1
Kc FISH_x Cy3_2L 488_pMT-GFP_rep3_condition1_001.nd2	1	Kc FISH_x Cy3_2L 488_pMT-GFP_rep3_condition1_008.nd2	1	Kc FISH_x Cy3_2L 488_Cap-H2-GFP_rep3_condition1_004.nd2	1	Kc FISH_x Cy3_2L 488_Cap-H2-GFP_rep3_condition1_005.nd2	2	Kc FISH_x Cy3_2L 488_MBM_rep3_condition1_001.nd2	1	Kc FISH_x Cy3_2L 488_MBM_rep3_condition1_006.nd2	1	Kc FISH_x Cy3_2L 488_dC23rep3_condition2_005.nd2	1	Kc FISH_x Cy3_2L 488_dC23rep3_condition2_005.nd2	4	Kc FISH_x Cy3_2L 488_dC23-MBMrep3_condition1_005.nd2	2	Kc FISH_x Cy3_2L 488_dC23-MBMrep3_condition1_001.nd2	2
Kc FISH_x Cy3_2L 488_pMT-GFP_rep3_condition1_001.nd2	1	Kc FISH_x Cy3_2L 488_pMT-GFP_rep3_condition1_001.nd2	2	Kc FISH_x Cy3_2L 488_Cap-H2-GFP_rep3_condition1_004.nd2	1	Kc FISH_x Cy3_2L 488_Cap-H2-GFP_rep3_condition1_001.nd2	1	Kc FISH_x Cy3_2L 488_MBM_rep3_condition1_001.nd2	1	Kc FISH_x Cy3_2L 488_MBM_rep3_condition1_006.nd2	2	Kc FISH_x Cy3_2L 488_dC23rep3_condition2_007.nd2	2	Kc FISH_x Cy3_2L 488_dC23rep3_condition1_002.nd2	3	Kc FISH_x Cy3_2L 488_dC23-MBMrep3_condition1_004.nd2	1	Kc FISH_x Cy3_2L 488_dC23-MBMrep3_condition1_009.nd2	1
Kc FISH_x Cy3_2L 488_pMT-GFP_rep3_condition1_002.nd2	1	Kc FISH_x Cy3_2L 488_pMT-GFP_rep3_condition1_001.nd2	1	Kc FISH_x Cy3_2L 488_Cap-H2-GFP_rep3_condition1_005.nd2	4	Kc FISH_x Cy3_2L 488_Cap-H2-GFP_rep3_condition1_002.nd2	2	Kc FISH_x Cy3_2L 488_MBM_rep3_condition1_001.nd2	1	Kc FISH_x Cy3_2L 488_MBM_rep3_condition1_006.nd2	1	Kc FISH_x Cy3_2L 488_dC23rep3_condition2_005.nd2	3	Kc FISH_x Cy3_2L 488_dC23rep3_condition1_001.nd2	2	Kc FISH_x Cy3_2L 488_dC23-MBMrep3_condition1_005.nd2	2	Kc FISH_x Cy3_2L 488_dC23-MBMrep3_condition1_005.nd2	1
Kc FISH_x Cy3_2L 488_pMT-GFP_rep3_condition1_002.nd2	1	Kc FISH_x Cy3_2L 488_pMT-GFP_rep3_condition1_001.nd2	2	Kc FISH_x Cy3_2L 488_Cap-H2-GFP_rep3_condition1_005.nd2	1	Kc FISH_x Cy3_2L 488_Cap-H2-GFP_rep3_condition1_001.nd2	2	Kc FISH_x Cy3_2L 488_MBM_rep3_condition1_001.nd2	1	Kc FISH_x Cy3_2L 488_MBM_rep3_condition1_006.nd2	2	Kc FISH_x Cy3_2L 488_dC23rep3_condition2_003.nd2	1	Kc FISH_x Cy3_2L 488_dC23rep3_condition1_001.nd2	3	Kc FISH_x Cy3_2L 488_dC23-MBMrep3_condition1_004.nd2	2	Kc FISH_x Cy3_2L 488_dC23-MBMrep3_condition1_008.nd2	2
Kc FISH_x Cy3_2L 488_pMT-GFP_rep3_condition1_002.nd2	2	Kc FISH_x Cy3_2L 488_pMT-GFP_rep3_condition1_001.nd2	1	Kc FISH_x Cy3_2L 488_Cap-H2-GFP_rep3_condition1_005.nd2	1	Kc FISH_x Cy3_2L 488_Cap-H2-GFP_rep3_condition1_005.nd2	2	Kc FISH_x Cy3_2L 488_MBM_rep3_condition1_006.nd2	2	Kc FISH_x Cy3_2L 488_MBM_rep3_condition1_006.nd2	2	Kc FISH_x Cy3_2L 488_dC23rep3_condition2_004.nd2	1	Kc FISH_x Cy3_2L 488_dC23rep3_condition1_002.nd2	1	Kc FISH_x Cy3_2L 488_dC23-MBMrep3_condition1_003.nd2	1	Kc FISH_x Cy3_2L 488_dC23-MBMrep3_condition1_001.nd2	2
Kc FISH_x Cy3_2L 488_pMT-GFP_rep3_condition1_002.nd2	2	Kc FISH_x Cy3_2L 488_pMT-GFP_rep3_condition1_001.nd2	1	Kc FISH_x Cy3_2L 488_Cap-H2-GFP_rep3_condition1_005.nd2	2	Kc FISH_x Cy3_2L 488_Cap-H2-GFP_rep3_condition1_004.nd2	2	Kc FISH_x Cy3_2L 488_MBM_rep3_condition1_006.nd2	2	Kc FISH_x Cy3_2L 488_MBM_rep3_condition1_005.nd2	1	Kc FISH_x Cy3_2L 488_dC23rep3_condition2_005.nd2	2	Kc FISH_x Cy3_2L 488_dC23rep3_condition2_007.nd2	2	Kc FISH_x Cy3_2L 488_dC23-MBMrep3_condition1_005.nd2	1	Kc FISH_x Cy3_2L 488_dC23-MBMrep3_condition1_001.nd2	2
Kc FISH_x Cy3_2L 488_pMT-GFP_rep3_condition1_002.nd2	1	Kc FISH_x Cy3_2L 488_pMT-GFP_rep3_condition1_001.nd2	1	Kc FISH_x Cy3_2L 488_Cap-H2-GFP_rep3_condition1_005.nd2	1	Kc FISH_x Cy3_2L 488_Cap-H2-GFP_rep3_condition1_001.nd2	1	Kc FISH_x Cy3_2L 488_MBM_rep3_condition1_006.nd2	3	Kc FISH_x Cy3_2L 488_MBM_rep3_condition1_005.nd2	1	Kc FISH_x Cy3_2L 488_dC23rep3_condition1_002.nd2	2	Kc FISH_x Cy3_2L 488_dC23rep3_condition2_007.nd2	2	Kc FISH_x Cy3_2L 488_dC23-MBMrep3_condition1_001.nd2	3	Kc FISH_x Cy3_2L 488_dC23-MBMrep3_condition1_003.nd2	2
Kc FISH_x Cy3_2L 488_pMT-GFP_rep3_condition1_002.nd2	1	Kc FISH_x Cy3_2L 488_pMT-GFP_rep3_condition1_002.nd2	2	Kc FISH_x Cy3_2L 488_Cap-H2-GFP_rep3_condition1_005.nd2	1	Kc FISH_x Cy3_2L 488_Cap-H2-GFP_rep3_condition1_003.nd2	2	Kc FISH_x Cy3_2L 488_MBM_rep3_condition1_006.nd2	1	Kc FISH_x Cy3_2L 488_MBM_rep3_condition1_005.nd2	1	Kc FISH_x Cy3_2L 488_dC23rep3_condition2_005.nd2	1	Kc FISH_x Cy3_2L 488_dC23rep3_condition2_004.nd2	2	Kc FISH_x Cy3_2L 488_dC23-MBMrep3_condition1_001.nd2	2	Kc FISH_x Cy3_2L 488_dC23-MBMrep3_condition1_008.nd2	1
Kc FISH_x Cy3_2L 488_pMT-GFP_rep3_condition1_003.nd2	2	Kc FISH_x Cy3_2L 488_pMT-GFP_rep3_condition1_002.nd2	2	Kc FISH_x Cy3_2L 488_Cap-H2-GFP_rep3_condition1_005.nd2	1	Kc FISH_x Cy3_2L 488_Cap-H2-GFP_rep3_condition1_002.nd2	1	Kc FISH_x Cy3_2L 488_MBM_rep3_condition1_006.nd2	1	Kc FISH_x Cy3_2L 488_MBM_rep3_condition1_005.nd2	2	Kc FISH_x Cy3_2L 488_dC23rep3_condition1_002.nd2	1	Kc FISH_x Cy3_2L 488_dC23rep3_condition2_003.nd2	4	Kc FISH_x Cy3_2L 488_dC23-MBMrep3_condition1_009.nd2	1	Kc FISH_x Cy3_2L 488_dC23-MBMrep3_condition1_009.nd2	1
Kc FISH_x Cy3_2L 488_pMT-GFP_rep3_condition1_003.nd2	1	Kc FISH_x Cy3_2L 488_pMT-GFP_rep3_condition1_002.nd2	1	Kc FISH_x Cy3_2L 488_Cap-H2-GFP_rep3_condition1_005.nd2	2	Kc FISH_x Cy3_2L 488_Cap-H2-GFP_rep3_condition1_002.nd2	2	Kc FISH_x Cy3_2L 488_MBM_rep3_condition1_006.nd2	1	Kc FISH_x Cy3_2L 488_MBM_rep3_condition1_005.nd2	1	Kc FISH_x Cy3_2L 488_dC23rep3_condition2_006.nd2	2	Kc FISH_x Cy3_2L 488_dC23rep3_condition2_006.nd2	3	Kc FISH_x Cy3_2L 488_dC23-MBMrep3_condition1_002.nd2	2	Kc FISH_x Cy3_2L 488_dC23-MBMrep3_condition1_001.nd2	2
Kc FISH_x Cy3_2L 488_pMT-GFP_rep3_condition1_003.nd2	1	Kc FISH_x Cy3_2L 488_pMT-GFP_rep3_condition1_002.nd2	1	Kc FISH_x Cy3_2L 488_Cap-H2-GFP_rep3_condition1_005.nd2	1	Kc FISH_x Cy3_2L 488_Cap-H2-GFP_rep3_condition1_002.nd2	2	Kc FISH_x Cy3_2L 488_MBM_rep3_condition1_006.nd2	1	Kc FISH_x Cy3_2L 488_MBM_rep3_condition1_005.nd2	1	Kc FISH_x Cy3_2L 488_dC23rep3_condition1_002.nd2	3	Kc FISH_x Cy3_2L 488_dC23rep3_condition2_004.nd2	1	Kc FISH_x Cy3_2L 488_dC23-MBMrep3_condition1_005.nd2	2	Kc FISH_x Cy3_2L 488_dC23-MBMrep3_condition1_003.nd2	2
Kc FISH_x Cy3_2L 488_pMT-GFP_rep3_condition1_003.nd2	1	Kc FISH_x Cy3_2L 488_pMT-GFP_rep3_condition1_002.nd2	1	Kc FISH_x Cy3_2L 488_Cap-H2-GFP_rep3_condition1_001.nd2	2	Kc FISH_x Cy3_2L 488_Cap-H2-GFP_rep3_condition1_004.nd2	1	Kc FISH_x Cy3_2L 488_MBM_rep3_condition1_006.nd2	1	Kc FISH_x Cy3_2L 488_MBM_rep3_condition1_005.nd2	1	Kc FISH_x Cy3_2L 488_dC23rep3_condition2_003.nd2	1	Kc FISH_x Cy3_2L 488_dC23rep3_condition1_001.nd2	3	Kc FISH_x Cy3_2L 488_dC23-MBMrep3_condition1_008.nd2	2	Kc FISH_x Cy3_2L 488_dC23-MBMrep3_condition1_008.nd2	2
Kc FISH_x Cy3_2L 488_pMT-GFP_rep3_condition1_003.nd2	1	Kc FISH_x Cy3_2L 488_pMT-GFP_rep3_condition1_003.nd2	1	Kc FISH_x Cy3_2L 488_Cap-H2-GFP_rep3_condition1_001.nd2	1	Kc FISH_x Cy3_2L 488_Cap-H2-GFP_rep3_condition1_001.nd2	2	Kc FISH_x Cy3_2L 488_MBM_rep3_condition1_005.nd2	1	Kc FISH_x Cy3_2L 488_MBM_rep3_condition1_005.nd2	1	Kc FISH_x Cy3_2L 488_dC23rep3_condition2_007.nd2	3	Kc FISH_x Cy3_2L 488_dC23rep3_condition2_007.nd2	1	Kc FISH_x Cy3_2L 488_dC23-MBMrep3_condition1_005.nd2	2	Kc FISH_x Cy3_2L 488_dC23-MBMrep3_condition1_004.nd2	2
Kc FISH_x Cy3_2L 488_pMT-GFP_rep3_condition1_003.nd2	2	Kc FISH_x Cy3_2L 488_pMT-GFP_rep3_condition1_003.nd2	1	Kc FISH_x Cy3_2L 488_Cap-H2-GFP_rep3_condition1_001.nd2	1	Kc FISH_x Cy3_2L 488_Cap-H2-GFP_rep3_condition1_005.nd2	1	Kc FISH_x Cy3_2L 488_MBM_rep3_condition1_005.nd2	2	Kc FISH_x Cy3_2L 488_MBM_rep3_condition1_004.nd2	2	Kc FISH_x Cy3_2L 488_dC23rep3_condition2_006.nd2	2	Kc FISH_x Cy3_2L 488_dC23rep3_condition2_004.nd2	1	Kc FISH_x Cy3_2L 488_dC23-MBMrep3_condition1_002.nd2	1	Kc FISH_x Cy3_2L 488_dC23-MBMrep3_condition1_001.nd2	1
Kc FISH_x Cy3_2L 488_pMT-GFP_rep3_condition1_003.nd2	1	Kc FISH_x Cy3_2L 488_pMT-GFP_rep3_condition1_003.nd2	1	Kc FISH_x Cy3_2L 488_Cap-H2-GFP_rep3_condition1_001.nd2	1	Kc FISH_x Cy3_2L 488_Cap-H2-GFP_rep3_condition1_005.nd2	1	Kc FISH_x Cy3_2L 488_MBM_rep3_condition1_005.nd2	1	Kc FISH_x Cy3_2L 488_MBM_rep3_condition1_004.nd2	1	Kc FISH_x Cy3_2L 488_dC23rep3_condition2_003.nd2	2	Kc FISH_x Cy3_2L 488_dC23rep3_condition1_002.nd2	1	Kc FISH_x Cy3_2L 488_dC23-MBMrep3_condition1_008.nd2	1	Kc FISH_x Cy3_2L 488_dC23-MBMrep3_condition1_001.nd2	2
Kc FISH_x Cy3_2L 488_pMT-GFP_rep3_condition1_004.nd2	1	Kc FISH_x Cy3_2L 488_pMT-GFP_rep3_condition1_003.nd2	1	Kc FISH_x Cy3_2L 488_Cap-H2-GFP_rep3_condition1_001.nd2	1	Kc FISH_x Cy3_2L 488_Cap-H2-GFP_rep3_condition1_003.nd2	2	Kc FISH_x Cy3_2L 488_MBM_rep3_condition1_005.nd2	2	Kc FISH_x Cy3_2L 488_MBM_rep3_condition1_004.nd2	1	Kc FISH_x Cy3_2L 488_dC23rep3_condition2_005.nd2	2	Kc FISH_x Cy3_2L 488_dC23rep3_condition2_007.nd2	1	Kc FISH_x Cy3_2L 488_dC23-MBMrep3_condition1_002.nd2	1	Kc FISH_x Cy3_2L 488_dC23-MBMrep3_condition1_005.nd2	2
Kc FISH_x Cy3_2L 488_pMT-GFP_rep3_condition1_004.nd2	1	Kc FISH_x Cy3_2L 488_pMT-GFP_rep3_condition1_003.nd2	2	Kc FISH_x Cy3_2L 488_Cap-H2-GFP_rep3_condition1_001.nd2	1	Kc FISH_x Cy3_2L 488_Cap-H2-GFP_rep3_condition1_004.nd2	1	Kc FISH_x Cy3_2L 488_MBM_rep3_condition1_005.nd2	1	Kc FISH_x Cy3_2L 488_MBM_rep3_condition1_004.nd2	1	Kc FISH_x Cy3_2L 488_dC23rep3_condition2_006.nd2	1	Kc FISH_x Cy3_2L 488_dC23rep3_condition1_001.nd2	1	Kc FISH_x Cy3_2L 488_dC23-MBMrep3_condition1_007.nd2	1	Kc FISH_x Cy3_2L 488_dC23-MBMrep3_condition1_007.nd2	2
Kc FISH_x Cy3_2L 488_pMT-GFP_rep3_condition1_004.nd2	1	Kc FISH_x Cy3_2L 488_pMT-GFP_rep3_condition1_003.nd2	1	Kc FISH_x Cy3_2L 488_Cap-H2-GFP_rep3_condition1_001.nd2	2	Kc FISH_x Cy3_2L 488_Cap-H2-GFP_rep3_condition1_001.nd2	2	Kc FISH_x Cy3_2L 488_MBM_rep3_condition1_005.nd2	1	Kc FISH_x Cy3_2L 488_MBM_rep3_condition1_004.nd2	1	Kc FISH_x Cy3_2L 488_dC23rep3_condition2_004.nd2	1	Kc FISH_x Cy3_2L 488_dC23rep3_condition2_007.nd2	1	Kc FISH_x Cy3_2L 488_dC23-MBMrep3_condition1_007.nd2	1	Kc FISH_x Cy3_2L 488_dC23-MBMrep3_condition1_001.nd2	2
Kc FISH_x Cy3_2L 488_pMT-GFP_rep3_condition1_004.nd2	1	Kc FISH_x Cy3_2L 488_pMT-GFP_rep3_condition1_003.nd2	1	Kc FISH_x Cy3_2L 488_Cap-H2-GFP_rep3_condition1_001.nd2	1	Kc FISH_x Cy3_2L 488_Cap-H2-GFP_rep3_condition1_001.nd2	1	Kc FISH_x Cy3_2L 488_MBM_rep3_condition1_005.nd2	1	Kc FISH_x Cy3_2L 488_MBM_rep3_condition1_004.nd2	2	Kc FISH_x Cy3_2L 488_dC23rep3_condition1_001.nd2	2	Kc FISH_x Cy3_2L 488_dC23rep3_condition2_007.nd2	2	Kc FISH_x Cy3_2L 488_dC23-MBMrep3_condition1_001.nd2	2	Kc FISH_x Cy3_2L 488_dC23-MBMrep3_condition1_005.nd2	1
Kc FISH_x Cy3_2L 488_pMT-GFP_rep3_condition1_005.nd2	2	Kc FISH_x Cy3_2L 488_pMT-GFP_rep3_condition1_004.nd2	3	Kc FISH_x Cy3_2L 488_Cap-H2-GFP_rep3_condition1_001.nd2	1	Kc FISH_x Cy3_2L 488_Cap-H2-GFP_rep3_condition1_005.nd2	1	Kc FISH_x Cy3_2L 488_MBM_rep3_condition1_005.nd2	1	Kc FISH_x Cy3_2L 488_MBM_rep3_condition1_004.nd2	1	Kc FISH_x Cy3_2L 488_dC23rep3_condition2_007.nd2	1	Kc FISH_x Cy3_2L 488_dC23rep3_condition2_005.nd2	1	Kc FISH_x Cy3_2L 488_dC23-MBMrep3_condition1_003.nd2	2	Kc FISH_x Cy3_2L 488_dC23-MBMrep3_condition1_007.nd2	2
Kc FISH_x Cy3_2L 488_pMT-GFP_rep3_condition1_005.nd2	1	Kc FISH_x Cy3_2L 488_pMT-GFP_rep3_condition1_004.nd2	1	Kc FISH_x Cy3_2L 488_Cap-H2-GFP_rep3_condition1_001.nd2	2	Kc FISH_x Cy3_2L 488_Cap-H2-GFP_rep3_condition1_002.nd2	1	Kc FISH_x Cy3_2L 488_MBM_rep3_condition1_004.nd2	2	Kc FISH_x Cy3_2L 488_MBM_rep3_condition1_004.nd2	2	Kc FISH_x Cy3_2L 488_dC23rep3_condition2_005.nd2	2	Kc FISH_x Cy3_2L 488_dC23rep3_condition1_001.nd2	2	Kc FISH_x Cy3_2L 488_dC23-MBMrep3_condition1_008.nd2	2	Kc FISH_x Cy3_2L 488_dC23-MBMrep3_condition1_005.nd2	1
Kc FISH_x Cy3_2L 488_pMT-GFP_rep3_condition1_005.nd2	1	Kc FISH_x Cy3_2L 488_pMT-GFP_rep3_condition1_004.nd2	1	Kc FISH_x Cy3_2L 488_Cap-H2-GFP_rep3_condition1_001.nd2	1	Kc FISH_x Cy3_2L 488_Cap-H2-GFP_rep3_condition1_002.nd2	2	Kc FISH_x Cy3_2L 488_MBM_rep3_condition1_004.nd2	2	Kc FISH_x Cy3_2L 488_MBM_rep3_condition1_004.nd2	1	Kc FISH_x Cy3_2L 488_dC23rep3_condition2_004.nd2	1	Kc FISH_x Cy3_2L 488_dC23rep3_condition2_006.nd2	1	Kc FISH_x Cy3_2L 488_dC23-MBMrep3_condition1_007.nd2	1	Kc FISH_x Cy3_2L 488_dC23-MBMrep3_condition1_001.nd2	2
Kc FISH_x Cy3_2L 488_pMT-GFP_rep3_condition1_005.nd2	1	Kc FISH_x Cy3_2L 488_pMT-GFP_rep3_condition1_004.nd2	1	Kc FISH_x Cy3_2L 488_Cap-H2-GFP_rep3_condition1_001.nd2	1	Kc FISH_x Cy3_2L 488_Cap-H2-GFP_rep3_condition1_003.nd2	2	Kc FISH_x Cy3_2L 488_MBM_rep3_condition1_004.nd2	1	Kc FISH_x Cy3_2L 488_MBM_rep3_condition1_004.nd2	1	Kc FISH_x Cy3_2L 488_dC23rep3_condition2_005.nd2	1	Kc FISH_x Cy3_2L 488_dC23rep3_condition2_004.nd2	2	Kc FISH_x Cy3_2L 488_dC23-MBMrep3_condition1_004.nd2	2	Kc FISH_x Cy3_2L 488_dC23-MBMrep3_condition1_009.nd2	2
Kc FISH_x Cy3_2L 488_pMT-GFP_rep3_condition1_005.nd2	1	Kc FISH_x Cy3_2L 488_pMT-GFP_rep3_condition1_004.nd2	1	Kc FISH_x Cy3_2L 488_Cap-H2-GFP_rep3_condition1_001.nd2	1	Kc FISH_x Cy3_2L 488_Cap-H2-GFP_rep3_condition1_001.nd2	2	Kc FISH_x Cy3_2L 488_MBM_rep3_condition1_004.nd2	2	Kc FISH_x Cy3_2L 488_MBM_rep3_condition1_004.nd2	2	Kc FISH_x Cy3_2L 488_dC23rep3_condition1_001.nd2	2	Kc FISH_x Cy3_2L 488_dC23rep3_condition2_005.nd2	1	Kc FISH_x Cy3_2L 488_dC23-MBMrep3_condition1_007.nd2	3	Kc FISH_x Cy3_2L 488_dC23-MBMrep3_condition1_004.nd2	1
Kc FISH_x Cy3_2L 488_pMT-GFP_rep3_condition1_005.nd2	1			Kc FISH_x Cy3_2L 488_Cap-H2-GFP_rep3_condition1_001.nd2	1	Kc FISH_x Cy3_2L 488_Cap-H2-GFP_rep3_condition1_001.nd2	1	Kc FISH_x Cy3_2L 488_MBM_rep3_condition1_004.nd2	1	Kc FISH_x Cy3_2L 488_MBM_rep3_condition1_003.nd2	1	Kc FISH_x Cy3_2L 488_dC23rep3_condition2_004.nd2	3	Kc FISH_x Cy3_2L 488_dC23rep3_condition2_004.nd2	1	Kc FISH_x Cy3_2L 488_dC23-MBMrep3_condition1_007.nd2	3	Kc FISH_x Cy3_2L 488_dC23-MBMrep3_condition1_002.nd2	2
Kc FISH_x Cy3_2L 488_pMT-GFP_rep3_condition1_005.nd2	1			Kc FISH_x Cy3_2L 488_Cap-H2-GFP_rep3_condition1_001.nd2	2	Kc FISH_x Cy3_2L 488_Cap-H2-GFP_rep3_condition1_005.nd2	1	Kc FISH_x Cy3_2L 488_MBM_rep3_condition1_004.nd2	1	Kc FISH_x Cy3_2L 488_MBM_rep3_condition1_003.nd2	1	Kc FISH_x Cy3_2L 488_dC23rep3_condition2_003.nd2	3	Kc FISH_x Cy3_2L 488_dC23rep3_condition1_002.nd2	1	Kc FISH_x Cy3_2L 488_dC23-MBMrep3_condition1_003.nd2	2	Kc FISH_x Cy3_2L 488_dC23-MBMrep3_condition1_007.nd2	1
				Kc FISH_x Cy3_2L 488_Cap-H2-GFP_rep3_condition1_001.nd2	1	Kc FISH_x Cy3_2L 488_Cap-H2-GFP_rep3_condition1_001.nd2	2	Kc FISH_x Cy3_2L 488_MBM_rep3_condition1_004.nd2	1	Kc FISH_x Cy3_2L 488_MBM_rep3_condition1_003.nd2	1	Kc FISH_x Cy3_2L 488_dC23rep3_condition2_003.nd2	4	Kc FISH_x Cy3_2L 488_dC23rep3_condition2_005.nd2	2	Kc FISH_x Cy3_2L 488_dC23-MBMrep3_condition1_007.nd2	1	Kc FISH_x Cy3_2L 488_dC23-MBMrep3_condition1_008.nd2	2
				Kc FISH_x Cy3_2L 488_Cap-H2-GFP_rep3_condition1_001.nd2	3	Kc FISH_x Cy3_2L 488_Cap-H2-GFP_rep3_condition1_004.nd2	1	Kc FISH_x Cy3_2L 488_MBM_rep3_condition1_004.nd2	2	Kc FISH_x Cy3_2L 488_MBM_rep3_condition1_003.nd2	1	Kc FISH_x Cy3_2L 488_dC23rep3_condition2_003.nd2	1	Kc FISH_x Cy3_2L 488_dC23rep3_condition2_006.nd2	1	Kc FISH_x Cy3_2L 488_dC23-MBMrep3_condition1_002.nd2	1	Kc FISH_x Cy3_2L 488_dC23-MBMrep3_condition1_008.nd2	1
						Kc FISH_x Cy3_2L 488_Cap-H2-GFP_rep3_condition1_004.nd2	2	Kc FISH_x Cy3_2L 488_MBM_rep3_condition1_004.nd2	2	Kc FISH_x Cy3_2L 488_MBM_rep3_condition1_003.nd2	2	Kc FISH_x Cy3_2L 488_dC23rep3_condition1_001.nd2	1	Kc FISH_x Cy3_2L 488_dC23rep3_condition2_007.nd2	2	Kc FISH_x Cy3_2L 488_dC23-MBMrep3_condition1_003.nd2	1	Kc FISH_x Cy3_2L 488_dC23-MBMrep3_condition1_002.nd2	2
						Kc FISH_x Cy3_2L 488_Cap-H2-GFP_rep3_condition1_005.nd2	1	Kc FISH_x Cy3_2L 488_MBM_rep3_condition1_004.nd2	2	Kc FISH_x Cy3_2L 488_MBM_rep3_condition1_003.nd2	1	Kc FISH_x Cy3_2L 488_dC23rep3_condition2_005.nd2	1	Kc FISH_x Cy3_2L 488_dC23rep3_condition2_003.nd2	1	Kc FISH_x Cy3_2L 488_dC23-MBMrep3_condition1_008.nd2	1	Kc FISH_x Cy3_2L 488_dC23-MBMrep3_condition1_003.nd2	1
										Kc FISH_x Cy3_2L 488_MBM_rep3_condition1_003.nd2	2	Kc FISH_x Cy3_2L 488_dC23rep3_condition2_005.nd2	2	Kc FISH_x Cy3_2L 488_dC23rep3_condition1_002.nd2	2	Kc FISH_x Cy3_2L 488_dC23-MBMrep3_condition1_001.nd2	1	Kc FISH_x Cy3_2L 488_dC23-MBMrep3_condition1_007.nd2	1
	Average		Average		Average		Average		Average		Average		Average		Average		Average		Average
	1.38356		1.38889		1.68243		1.68667		1.44667		1.51656		1.8543		1.77483		1.61589		1.59603

## Sheet: Figure 7G gumball counts
Category	pMT-eGFP		pMT-Cap-H2-eGFP		pMT-Cap-H2-MBM-eGFP		pMT-Cap-H2-dC23-eGFP		pMT-Cap-H2-MBM-dC23-eGFP
	Number of cells	Percent	Number of cells	Percent	Number of cells	Percent	Number of cells	Percent	Number of cells	Percent
normal	502	94.5386	372	69.9248	463	79.9655	573	60.5069	577	65.8676
gumball	29	5.46139	160	30.0752	116	20.0345	374	39.4931	299	34.1324

## Sheet: Figure 7M compact. measurements
pMT-EGFP	X1-X2 distance (um)	pMT-Cap-H2-EGFP	X1-X2 distance (um)	pMT-Cap-H2-MBM-EGFP	X1-X2 distance (um)	pMT-Cap-H2-dC23-EGFP	X1-X2 distance (um)	pMT-Cap-H2-MBM-dC23-EGFP	X1-X2 distance (um)
Source	Length xyz (um)	Source	Length xyz	Source	Length xyz	Source	Length xyz	Source	Length xyz
9-23-14_KC FISH_MBM consts_pMT-GFP_ probes_set1_016.nd2	2.26	9-23-14_KC FISH_MBM constructs_compaction_X probes_set1_002.nd2	1.7	9-23-14_KC FISH_MBM constructs_cap-h2-MBM_X probes_set1_001.nd2	0.81	9-23-14_KC FISH_MBM constructs_cap-h2-dc23_ probes_set1_007.nd2	3.09	9-23-14_KC FISH_MBM consts_cap-h2-MBM-dc23_ probes_set1_011.nd2	1.37
9-23-14_KC FISH_MBM consts_pMT-GFP_ probes_set1_016.nd2	2.84	9-23-14_KC FISH_MBM constructs_compaction_X probes_set1_002.nd2	1.66	9-23-14_KC FISH_MBM constructs_cap-h2-MBM_X probes_set1_001.nd2	2.02	9-23-14_KC FISH_MBM constructs_cap-h2-dc23_ probes_set1_007.nd2	2.26	9-23-14_KC FISH_MBM consts_cap-h2-MBM-dc23_ probes_set1_011.nd2	1.66
9-23-14_KC FISH_MBM consts_pMT-GFP_ probes_set1_016.nd2	2.26	9-23-14_KC FISH_MBM constructs_compaction_X probes_set1_002.nd2	1.24	9-23-14_KC FISH_MBM constructs_cap-h2-MBM_X probes_set1_001.nd2	2.54	9-23-14_KC FISH_MBM constructs_cap-h2-dc23_ probes_set1_007.nd2	2.2	9-23-14_KC FISH_MBM consts_cap-h2-MBM-dc23_ probes_set1_011.nd2	2.36
9-23-14_KC FISH_MBM consts_pMT-GFP_ probes_set1_016.nd2	1.01	9-23-14_KC FISH_MBM constructs_compaction_X probes_set1_002.nd2	2.68	9-23-14_KC FISH_MBM constructs_cap-h2-MBM_X probes_set1_001.nd2	3.06	9-23-14_KC FISH_MBM constructs_cap-h2-dc23_ probes_set1_007.nd2	2.29	9-23-14_KC FISH_MBM consts_cap-h2-MBM-dc23_ probes_set1_011.nd2	1.89
9-23-14_KC FISH_MBM consts_pMT-GFP_ probes_set1_016.nd2	1.93	9-23-14_KC FISH_MBM constructs_compaction_X probes_set1_002.nd2	0.9	9-23-14_KC FISH_MBM constructs_cap-h2-MBM_X probes_set1_001.nd2	2.49	9-23-14_KC FISH_MBM constructs_cap-h2-dc23_ probes_set1_008.nd2	1.57	9-23-14_KC FISH_MBM consts_cap-h2-MBM-dc23_ probes_set1_011.nd2	1.5
9-23-14_KC FISH_MBM consts_pMT-GFP_ probes_set1_017.nd2	4.69	9-23-14_KC FISH_MBM constructs_compaction_X probes_set1_002.nd2	1.35	9-23-14_KC FISH_MBM constructs_cap-h2-MBM_X probes_set1_001.nd2	2.05	9-23-14_KC FISH_MBM constructs_cap-h2-dc23_ probes_set1_008.nd2	1.27	9-23-14_KC FISH_MBM consts_cap-h2-MBM-dc23_ probes_set1_011.nd2	2.13
9-23-14_KC FISH_MBM consts_pMT-GFP_ probes_set1_017.nd2	1.76	9-23-14_KC FISH_MBM constructs_compaction_X probes_set1_003.nd2	1.13	9-23-14_KC FISH_MBM constructs_cap-h2-MBM_X probes_set1_002.nd2	3.16	9-23-14_KC FISH_MBM constructs_cap-h2-dc23_ probes_set1_008.nd2	1.46	9-23-14_KC FISH_MBM consts_cap-h2-MBM-dc23_ probes_set1_011.nd2	1.76
9-23-14_KC FISH_MBM consts_pMT-GFP_ probes_set1_017.nd2	3.7	9-23-14_KC FISH_MBM constructs_compaction_X probes_set1_003.nd2	0.81	9-23-14_KC FISH_MBM constructs_cap-h2-MBM_X probes_set1_002.nd2	3.33	9-23-14_KC FISH_MBM constructs_cap-h2-dc23_ probes_set1_008.nd2	2.55	9-23-14_KC FISH_MBM consts_cap-h2-MBM-dc23_ probes_set1_011.nd2	1.8
9-23-14_KC FISH_MBM consts_pMT-GFP_ probes_set1_017.nd2	3.04	9-23-14_KC FISH_MBM constructs_compaction_X probes_set1_003.nd2	1.37	9-23-14_KC FISH_MBM constructs_cap-h2-MBM_X probes_set1_002.nd2	1.86	9-23-14_KC FISH_MBM constructs_cap-h2-dc23_ probes_set1_008.nd2	1.58	9-23-14_KC FISH_MBM consts_cap-h2-MBM-dc23_ probes_set1_012.nd2	1.5
9-23-14_KC FISH_MBM consts_pMT-GFP_ probes_set1_017.nd2	2.52	9-23-14_KC FISH_MBM constructs_compaction_X probes_set1_003.nd2	0.92	9-23-14_KC FISH_MBM constructs_cap-h2-MBM_X probes_set1_002.nd2	2.77	9-23-14_KC FISH_MBM constructs_cap-h2-dc23_ probes_set1_008.nd2	1.01	9-23-14_KC FISH_MBM consts_cap-h2-MBM-dc23_ probes_set1_012.nd2	2.16
9-23-14_KC FISH_MBM consts_pMT-GFP_ probes_set1_018.nd2	1.46	9-23-14_KC FISH_MBM constructs_compaction_X probes_set1_003.nd2	1.83	9-23-14_KC FISH_MBM constructs_cap-h2-MBM_X probes_set1_002.nd2	3.26	9-23-14_KC FISH_MBM constructs_cap-h2-dc23_ probes_set1_008.nd2	2.37	9-23-14_KC FISH_MBM consts_cap-h2-MBM-dc23_ probes_set1_012.nd2	3.08
9-23-14_KC FISH_MBM consts_pMT-GFP_ probes_set1_018.nd2	1.24	9-23-14_KC FISH_MBM constructs_compaction_X probes_set1_003.nd2	2.12	9-23-14_KC FISH_MBM constructs_cap-h2-MBM_X probes_set1_002.nd2	3.02	9-23-14_KC FISH_MBM constructs_cap-h2-dc23_ probes_set1_008.nd2	0.99	9-23-14_KC FISH_MBM consts_cap-h2-MBM-dc23_ probes_set1_012.nd2	2.29
9-23-14_KC FISH_MBM consts_pMT-GFP_ probes_set1_018.nd2	1.64	9-23-14_KC FISH_MBM constructs_compaction_X probes_set1_003.nd2	0.9	9-23-14_KC FISH_MBM constructs_cap-h2-MBM_X probes_set1_003.nd2	1.4	9-23-14_KC FISH_MBM constructs_cap-h2-dc23_ probes_set1_008.nd2	1.28	9-23-14_KC FISH_MBM consts_cap-h2-MBM-dc23_ probes_set1_013.nd2	2.12
9-23-14_KC FISH_MBM consts_pMT-GFP_ probes_set1_018.nd2	2.06	9-23-14_KC FISH_MBM constructs_compaction_X probes_set1_004.nd2	1.93	9-23-14_KC FISH_MBM constructs_cap-h2-MBM_X probes_set1_003.nd2	2.29	9-23-14_KC FISH_MBM constructs_cap-h2-dc23_ probes_set1_008.nd2	2.84	9-23-14_KC FISH_MBM consts_cap-h2-MBM-dc23_ probes_set1_013.nd2	2.78
9-23-14_KC FISH_MBM consts_pMT-GFP_ probes_set1_018.nd2	2.09	9-23-14_KC FISH_MBM constructs_compaction_X probes_set1_004.nd2	1.5	9-23-14_KC FISH_MBM constructs_cap-h2-MBM_X probes_set1_003.nd2	3.3	9-23-14_KC FISH_MBM constructs_cap-h2-dc23_ probes_set1_008.nd2	2.57	9-23-14_KC FISH_MBM consts_cap-h2-MBM-dc23_ probes_set1_013.nd2	2.26
9-23-14_KC FISH_MBM consts_pMT-GFP_ probes_set1_019.nd2	1.11	9-23-14_KC FISH_MBM constructs_compaction_X probes_set1_004.nd2	1.41	9-23-14_KC FISH_MBM constructs_cap-h2-MBM_X probes_set1_003.nd2	1.87	9-23-14_KC FISH_MBM constructs_cap-h2-dc23_ probes_set1_008.nd2	3.11	9-23-14_KC FISH_MBM consts_cap-h2-MBM-dc23_ probes_set1_013.nd2	1.84
9-23-14_KC FISH_MBM consts_pMT-GFP_ probes_set1_019.nd2	1.87	9-23-14_KC FISH_MBM constructs_compaction_X probes_set1_004.nd2	2.09	9-23-14_KC FISH_MBM constructs_cap-h2-MBM_X probes_set1_003.nd2	1.53	9-23-14_KC FISH_MBM constructs_cap-h2-dc23_ probes_set1_009.nd2	0.4	9-23-14_KC FISH_MBM consts_cap-h2-MBM-dc23_ probes_set1_013.nd2	1.14
9-23-14_KC FISH_MBM consts_pMT-GFP_ probes_set1_019.nd2	1.04	9-23-14_KC FISH_MBM constructs_compaction_X probes_set1_004.nd2	3.09	9-23-14_KC FISH_MBM constructs_cap-h2-MBM_X probes_set1_003.nd2	1.93	9-23-14_KC FISH_MBM constructs_cap-h2-dc23_ probes_set1_009.nd2	2.82	9-23-14_KC FISH_MBM consts_cap-h2-MBM-dc23_ probes_set1_013.nd2	4.79
9-23-14_KC FISH_MBM consts_pMT-GFP_ probes_set1_019.nd2	2.36	9-23-14_KC FISH_MBM constructs_compaction_X probes_set1_005.nd2	2.28	9-23-14_KC FISH_MBM constructs_cap-h2-MBM_X probes_set1_003.nd2	1.78	9-23-14_KC FISH_MBM constructs_cap-h2-dc23_ probes_set1_009.nd2	2.49	9-23-14_KC FISH_MBM consts_cap-h2-MBM-dc23_ probes_set1_013.nd2	1.77
9-23-14_KC FISH_MBM consts_pMT-GFP_ probes_set1_019.nd2	3.9	9-23-14_KC FISH_MBM constructs_compaction_X probes_set1_005.nd2	1.77	9-23-14_KC FISH_MBM constructs_cap-h2-MBM_X probes_set1_004.nd2	2.23	9-23-14_KC FISH_MBM constructs_cap-h2-dc23_ probes_set1_009.nd2	2.37	9-23-14_KC FISH_MBM consts_cap-h2-MBM-dc23_ probes_set1_013.nd2	1.41
9-23-14_KC FISH_MBM consts_pMT-GFP_ probes_set1_019.nd2	2.24	9-23-14_KC FISH_MBM constructs_compaction_X probes_set1_005.nd2	2.76	9-23-14_KC FISH_MBM constructs_cap-h2-MBM_X probes_set1_004.nd2	2	9-23-14_KC FISH_MBM constructs_cap-h2-dc23_ probes_set1_009.nd2	2.45	9-23-14_KC FISH_MBM consts_cap-h2-MBM-dc23_ probes_set1_014.nd2	2.61
9-23-14_KC FISH_MBM consts_pMT-GFP_ probes_set1_019.nd2	2.72	9-23-14_KC FISH_MBM constructs_compaction_X probes_set1_005.nd2	1.75	9-23-14_KC FISH_MBM constructs_cap-h2-MBM_X probes_set1_004.nd2	1.53	9-23-14_KC FISH_MBM constructs_cap-h2-dc23_ probes_set1_009.nd2	3.25	9-23-14_KC FISH_MBM consts_cap-h2-MBM-dc23_ probes_set1_014.nd2	3.22
9-23-14_KC FISH_MBM consts_pMT-GFP_ probes_set1_020.nd2	1.77	9-23-14_KC FISH_MBM constructs_compaction_X probes_set1_005.nd2	2.54	9-23-14_KC FISH_MBM constructs_cap-h2-MBM_X probes_set1_004.nd2	3	9-23-14_KC FISH_MBM constructs_cap-h2-dc23_ probes_set1_009.nd2	2.46	9-23-14_KC FISH_MBM consts_cap-h2-MBM-dc23_ probes_set1_014.nd2	1.64
9-23-14_KC FISH_MBM consts_pMT-GFP_ probes_set1_020.nd2	2.04	9-23-14_KC FISH_MBM constructs_compaction_X probes_set1_006.nd2	3.25	9-23-14_KC FISH_MBM constructs_cap-h2-MBM_X probes_set1_004.nd2	2.48	9-23-14_KC FISH_MBM constructs_cap-h2-dc23_ probes_set1_009.nd2	2.12	9-23-14_KC FISH_MBM consts_cap-h2-MBM-dc23_ probes_set1_014.nd2	1.26
9-23-14_KC FISH_MBM consts_pMT-GFP_ probes_set1_020.nd2	1.43	9-23-14_KC FISH_MBM constructs_compaction_X probes_set1_006.nd2	2.39	9-23-14_KC FISH_MBM constructs_cap-h2-MBM_X probes_set1_004.nd2	2.21	9-23-14_KC FISH_MBM constructs_cap-h2-dc23_ probes_set1_009.nd2	2.21	9-23-14_KC FISH_MBM consts_cap-h2-MBM-dc23_ probes_set1_014.nd2	4.15
9-23-14_KC FISH_MBM consts_pMT-GFP_ probes_set1_020.nd2	4.27	9-23-14_KC FISH_MBM constructs_compaction_X probes_set1_006.nd2	2.24	9-23-14_KC FISH_MBM constructs_cap-h2-MBM_X probes_set1_005.nd2	2.52	9-23-14_KC FISH_MBM constructs_cap-h2-dc23_ probes_set1_009.nd2	1.98	9-23-14_KC FISH_MBM consts_cap-h2-MBM-dc23_ probes_set1_014.nd2	2.52
9-23-14_KC FISH_MBM consts_pMT-GFP_ probes_set1_020.nd2	2.77	9-23-14_KC FISH_MBM constructs_compaction_X probes_set1_006.nd2	2.66	9-23-14_KC FISH_MBM constructs_cap-h2-MBM_X probes_set1_005.nd2	2.79	9-23-14_KC FISH_MBM constructs_cap-h2-dc23_ probes_set1_009.nd2	2.33	9-23-14_KC FISH_MBM consts_cap-h2-MBM-dc23_ probes_set1_014.nd2	2.05
Kc X chrom compaction FISH_2nd pass_set1_007.nd2	1.79	9-23-14_KC FISH_MBM constructs_compaction_X probes_set1_006.nd2	3.15	9-23-14_KC FISH_MBM constructs_cap-h2-MBM_X probes_set1_005.nd2	2.16	9-23-14_KC FISH_MBM constructs_cap-h2-dc23_ probes_set1_009.nd2	0.97	9-23-14_KC FISH_MBM consts_cap-h2-MBM-dc23_ probes_set1_014.nd2	1.81
Kc X chrom compaction FISH_2nd pass_set1_007.nd2	1.11	9-23-14_KC FISH_MBM constructs_cap-h2-_X probes_set1_006.nd2	3.62	9-23-14_KC FISH_MBM constructs_cap-h2-MBM_X probes_set1_005.nd2	1.13	9-23-14_KC FISH_MBM constructs_cap-h2-dc23_ probes_set1_010.nd2	2.59	9-23-14_KC FISH_MBM consts_cap-h2-MBM-dc23_ probes_set1_014.nd2	4.83
Kc X chrom compaction FISH_2nd pass_set1_007.nd2	1.51	9-23-14_KC FISH_MBM constructs_cap-h2-_X probes_set1_006.nd2	1.12	9-23-14_KC FISH_MBM constructs_cap-h2-MBM_X probes_set1_005.nd2	2.68	9-23-14_KC FISH_MBM constructs_cap-h2-dc23_ probes_set1_010.nd2	1.59	9-23-14_KC FISH_MBM consts_cap-h2-MBM-dc23_ probes_set1_015.nd2	2.38
Kc X chrom compaction FISH_2nd pass_set1_006.nd2	1.79	9-23-14_KC FISH_MBM constructs_cap-h2-_X probes_set1_006.nd2	1.39	9-23-14_KC FISH_MBM constructs_cap-h2-MBM_X probes_set1_005.nd2	1.14	9-23-14_KC FISH_MBM constructs_cap-h2-dc23_ probes_set1_010.nd2	2.39	9-23-14_KC FISH_MBM consts_cap-h2-MBM-dc23_ probes_set1_015.nd2	3.39
Kc X chrom compaction FISH_2nd pass_set1_006.nd2	1.76	9-23-14_KC FISH_MBM constructs_cap-h2-_X probes_set1_006.nd2	1.58	Kc X chrom compaction FISH_2nd pass_set1_001.nd2	0.9	9-23-14_KC FISH_MBM constructs_cap-h2-dc23_ probes_set1_010.nd2	2.98	9-23-14_KC FISH_MBM consts_cap-h2-MBM-dc23_ probes_set1_015.nd2	2.88
Kc X chrom compaction FISH_2nd pass_set1_006.nd2	3.11	9-23-14_KC FISH_MBM constructs_cap-h2-_X probes_set1_006.nd2	1.98	Kc X chrom compaction FISH_2nd pass_set1_001.nd2	0.9	9-23-14_KC FISH_MBM constructs_cap-h2-dc23_ probes_set1_010.nd2	1.07	9-23-14_KC FISH_MBM consts_cap-h2-MBM-dc23_ probes_set1_015.nd2	2.19
Kc X chrom compaction FISH_2nd pass_set1_006.nd2	1.46	Kc X chrom compaction FISH_2nd pass_set1_001.nd2	1.64	Kc X chrom compaction FISH_2nd pass_set1_001.nd2	3.24	9-23-14_KC FISH_MBM constructs_cap-h2-dc23_ probes_set1_010.nd2	1.93	9-23-14_KC FISH_MBM consts_cap-h2-MBM-dc23_ probes_set1_015.nd2	2.16
Kc X chrom compaction FISH_2nd pass_set1_006.nd2	2.61	Kc X chrom compaction FISH_2nd pass_set1_001.nd2	2.3	Kc X chrom compaction FISH_2nd pass_set1_002.nd2	1.64	9-23-14_KC FISH_MBM constructs_cap-h2-dc23_ probes_set1_010.nd2	2.02	9-23-14_KC FISH_MBM consts_cap-h2-MBM-dc23_ probes_set1_015.nd2	1.76
Kc X chrom compaction FISH_2nd pass_set1_005.nd2	1.13	Kc X chrom compaction FISH_2nd pass_set1_001.nd2	0.81	Kc X chrom compaction FISH_2nd pass_set1_002.nd2	3.17	9-23-14_KC FISH_MBM constructs_cap-h2-dc23_ probes_set1_010.nd2	1.9	10-9-14_Kc FISH_Xprobes_rep2_set1_001nd2001.nd2	1.45
Kc X chrom compaction FISH_2nd pass_set1_005.nd2	2.18	Kc X chrom compaction FISH_2nd pass_set1_001.nd2	0.78	Kc X chrom compaction FISH_2nd pass_set1_002.nd2	2.29	9-23-14_KC FISH_MBM constructs_cap-h2-dc23_ probes_set1_010.nd2	2.04	10-9-14_Kc FISH_Xprobes_rep2_set1_001nd2001.nd2	1.57
Kc X chrom compaction FISH_2nd pass_set1_005.nd2	1.93	Kc X chrom compaction FISH_2nd pass_set1_001.nd2	3.91	Kc X chrom compaction FISH_2nd pass_set1_002.nd2	1.47	9-23-14_KC FISH_MBM constructs_cap-h2-dc23_ probes_set1_010.nd2	1.5	10-9-14_Kc FISH_Xprobes_rep2_set1_001nd2001.nd2	1.05
Kc X chrom compaction FISH_2nd pass_set1_005.nd2	1.71	Kc X chrom compaction FISH_2nd pass_set1_001.nd2	0.85	Kc X chrom compaction FISH_2nd pass_set1_002.nd2	1.51	9-23-14_KC FISH_MBM constructs_cap-h2-dc23_ probes_set1_010.nd2	1.26	10-9-14_Kc FISH_Xprobes_rep2_set1_001nd2001.nd2	1.24
Kc X chrom compaction FISH_2nd pass_set1_005.nd2	0.81	Kc X chrom compaction FISH_2nd pass_set1_002.nd2	2.18	Kc X chrom compaction FISH_2nd pass_set1_002.nd2	1.76	9-23-14_KC FISH_MBM constructs_cap-h2-dc23_ probes_set1_010.nd2	1.89	10-9-14_Kc FISH_Xprobes_rep2_set1_001nd2002.nd2	2.39
Kc X chrom compaction FISH_2nd pass_set1_004.nd2	1.4	Kc X chrom compaction FISH_2nd pass_set1_002.nd2	1.32	Kc X chrom compaction FISH_2nd pass_set1_002.nd2	2.56	9-23-14_KC FISH_MBM constructs_cap-h2-dc23_ probes_set1_010.nd2	2.25	10-9-14_Kc FISH_Xprobes_rep2_set1_001nd2002.nd2	1.79
Kc X chrom compaction FISH_2nd pass_set1_004.nd2	1.99	Kc X chrom compaction FISH_2nd pass_set1_002.nd2	1.42	Kc X chrom compaction FISH_2nd pass_set1_003.nd2	2.78	9-23-14_KC FISH_MBM constructs_cap-h2-dc23_ probes_set1_010.nd2	1.61	10-9-14_Kc FISH_Xprobes_rep2_set1_001nd2002.nd2	3
Kc X chrom compaction FISH_2nd pass_set1_003.nd2	1.02	Kc X chrom compaction FISH_2nd pass_set1_002.nd2	1.4	Kc X chrom compaction FISH_2nd pass_set1_003.nd2	0.92	10-9-14_Kc FISH_Xprobes_rep2_set1_001nd2003.nd2	0.92	10-9-14_Kc FISH_Xprobes_rep2_set1_001nd2002.nd2	3.48
Kc X chrom compaction FISH_2nd pass_set1_003.nd2	1.94	Kc X chrom compaction FISH_2nd pass_set1_002.nd2	1.18	Kc X chrom compaction FISH_2nd pass_set1_003.nd2	2.26	10-9-14_Kc FISH_Xprobes_rep2_set1_001nd2003.nd2	1.05	10-9-14_Kc FISH_Xprobes_rep2_set1_001nd2003.nd2	2.2
Kc X chrom compaction FISH_2nd pass_set1_003.nd2	0.73	Kc X chrom compaction FISH_2nd pass_set1_003.nd2	0.82	Kc X chrom compaction FISH_2nd pass_set1_003.nd2	2.03	10-9-14_Kc FISH_Xprobes_rep2_set1_001nd2002.nd2	1.09	10-9-14_Kc FISH_Xprobes_rep2_set1_001nd2003.nd2	3.65
Kc X chrom compaction FISH_2nd pass_set1_003.nd2	2.38	Kc X chrom compaction FISH_2nd pass_set1_003.nd2	1.1	Kc X chrom compaction FISH_2nd pass_set1_003.nd2	1.8	10-9-14_Kc FISH_Xprobes_rep2_set1_001nd2002.nd2	1.28	10-9-14_Kc FISH_Xprobes_rep2_set1_001nd2003.nd2	2.83
Kc X chrom compaction FISH_2nd pass_set1_003.nd2	2.3	Kc X chrom compaction FISH_2nd pass_set1_003.nd2	1.31	Kc X chrom compaction FISH_2nd pass_set1_003.nd2	0.9	Kc X chrom compaction FISH_2nd pass_set1_002.nd2	1.27	10-9-14_Kc FISH_Xprobes_rep2_set1_001nd2003.nd2	1.31
Kc X chrom compaction FISH_2nd pass_set1_003.nd2	2.48	Kc X chrom compaction FISH_2nd pass_set1_003.nd2	0.81	Kc X chrom compaction FISH_2nd pass_set1_004.nd2	2.65	Kc X chrom compaction FISH_2nd pass_set1_002.nd2	2.52	10-9-14_Kc FISH_Xprobes_rep2_set1_001nd2003.nd2	2.96
Kc X chrom compaction FISH_2nd pass_set1_002.nd2	2.84	Kc X chrom compaction FISH_2nd pass_set1_004.nd2	0.68	Kc X chrom compaction FISH_2nd pass_set1_004.nd2	0.95	Kc X chrom compaction FISH_2nd pass_set1_002.nd2	1.48	10-9-14_Kc FISH_Xprobes_rep2_set1_001nd2003.nd2	2.83
Kc X chrom compaction FISH_2nd pass_set1_002.nd2	2.49	Kc X chrom compaction FISH_2nd pass_set1_004.nd2	1.45	Kc X chrom compaction FISH_2nd pass_set1_004.nd2	1.67	Kc X chrom compaction FISH_2nd pass_set1_002.nd2	1.17	10-9-14_Kc FISH_Xprobes_rep2_set1_001nd2003.nd2	2.56
Kc X chrom compaction FISH_2nd pass_set1_002.nd2	1.76	Kc X chrom compaction FISH_2nd pass_set1_004.nd2	1.58	Kc X chrom compaction FISH_2nd pass_set1_004.nd2	1.19	Kc X chrom compaction FISH_2nd pass_set1_002.nd2	1.95	10-9-14_Kc FISH_Xprobes_rep2_set1_001nd2003.nd2	2.84
Kc X chrom compaction FISH_2nd pass_set1_002.nd2	1.89	Kc X chrom compaction FISH_2nd pass_set1_004.nd2	1.93	Kc X chrom compaction FISH_2nd pass_set1_004.nd2	1.17	Kc X chrom compaction FISH_2nd pass_set1_002.nd2	2.2	10-9-14_Kc FISH_Xprobes_rep2_set1_001nd2003.nd2	3.26
Kc X chrom compaction FISH_2nd pass_set1_002.nd2	2.81	Kc X chrom compaction FISH_2nd pass_set1_004.nd2	2.06	Kc X chrom compaction FISH_2nd pass_set1_005.nd2	3.55	Kc X chrom compaction FISH_2nd pass_set1_002.nd2	1.24	10-9-14_Kc FISH_Xprobes_rep2_set1_001nd2003.nd2	2.73
Kc X chrom compaction FISH_2nd pass_set1_002.nd2	3.78	Kc X chrom compaction FISH_2nd pass_set1_004.nd2	2.2	Kc X chrom compaction FISH_2nd pass_set1_005.nd2	2.11	Kc X chrom compaction FISH_2nd pass_set1_002.nd2	1.31	10-9-14_Kc FISH_Xprobes_rep2_set1_001nd2004.nd2	1.3
Kc X chrom compaction FISH_2nd pass_set1_002.nd2	4.12	Kc X chrom compaction FISH_2nd pass_set1_004.nd2	1.67	Kc X chrom compaction FISH_2nd pass_set1_005.nd2	3.59	Kc X chrom compaction FISH_2nd pass_set1_002.nd2	2.07	10-9-14_Kc FISH_Xprobes_rep2_set1_001nd2004.nd2	1.35
Kc X chrom compaction FISH_2nd pass_set1_002.nd2	2.3	Kc X chrom compaction FISH_2nd pass_set1_005.nd2	2.14	Kc X chrom compaction FISH_2nd pass_set1_005.nd2	2.78	Kc X chrom compaction FISH_2nd pass_set1_001.nd2	1.31	10-9-14_Kc FISH_Xprobes_rep2_set1_001nd2004.nd2	1.76
Kc X chrom compaction FISH_2nd pass_set1_001.nd2	3.39	Kc X chrom compaction FISH_2nd pass_set1_005.nd2	1.02	Kc X chrom compaction FISH_2nd pass_set1_005.nd2	2.52	Kc X chrom compaction FISH_2nd pass_set1_001.nd2	1.76	10-9-14_Kc FISH_Xprobes_rep2_set1_001nd2004.nd2	1.81
Kc X chrom compaction FISH_2nd pass_set1_001.nd2	2.76	Kc X chrom compaction FISH_2nd pass_set1_005.nd2	2.13	Kc X chrom compaction FISH_2nd pass_set1_005.nd2	0.93	Kc X chrom compaction FISH_2nd pass_set1_001.nd2	0.83	10-9-14_Kc FISH_Xprobes_rep2_set1_001nd2004.nd2	2.35
Kc X chrom compaction FISH_2nd pass_set1_001.nd2	1.07	Kc X chrom compaction FISH_2nd pass_set1_005.nd2	1.74	Kc X chrom compaction FISH_2nd pass_set1_005.nd2	1.68	Kc X chrom compaction FISH_2nd pass_set1_001.nd2	2.45	10-9-14_Kc FISH_Xprobes_rep2_set1_001nd2004.nd2	2.37
Kc X chrom compaction FISH_2nd pass_set1_001.nd2	3.61	Kc X chrom compaction FISH_2nd pass_set1_005.nd2	1.27	Kc X chrom compaction FISH_2nd pass_set1_005.nd2	2.78	Kc X chrom compaction FISH_2nd pass_set1_001.nd2	2.08	10-9-14_Kc FISH_Xprobes_rep2_set1_001nd2004.nd2	1.24
	Average distance		Average distance		Average distance		Average distance		Average distance
	2.19967		1.74683		2.134		1.88817		2.263

## Sheet: Figure 8D GFP-LacI spots
Cap-H2-EGFPxCap-H2 O/E			Cap-H2-MBM-EGFPxCap-H2 O/E
Source Image	Number of LacI-GFP spots	Average per gland	Source Image	Number of LacI-GFP spots	Average per gland
Replicate 1			Replicate 1
10-2-14_spotsxCap-H2-GFP_s.g._gland 1_set1_001.nd2	4		10-2-14_spotsxCap-H2-MBM-GFP_s.g._gland 2_set1_002.nd2	2
10-2-14_spotsxCap-H2-GFP_s.g._gland 1_set1_001.nd2	6		10-2-14_spotsxCap-H2-MBM-GFP_s.g._gland 2_set1_002.nd2	4
10-2-14_spotsxCap-H2-GFP_s.g._gland 1_set1_001.nd2	6		10-2-14_spotsxCap-H2-MBM-GFP_s.g._gland 2_set1_002.nd2	3
10-2-14_spotsxCap-H2-GFP_s.g._gland 1_set1_001.nd2	7		10-2-14_spotsxCap-H2-MBM-GFP_s.g._gland 2_set1_002.nd2	3
10-2-14_spotsxCap-H2-GFP_s.g._gland 1_set1_001.nd2	9		10-2-14_spotsxCap-H2-MBM-GFP_s.g._gland 2_set1_002.nd2	4	3.2
10-2-14_spotsxCap-H2-GFP_s.g._gland 1_set1_001.nd2	7	6.5	10-2-14_spotsxCap-H2-MBM-GFP_s.g._gland 5_set1_005.nd2	7
10-2-14_spotsxCap-H2-GFP_s.g._gland 4_set1_004.nd2	9		10-2-14_spotsxCap-H2-MBM-GFP_s.g._gland 5_set1_005.nd2	6
10-2-14_spotsxCap-H2-GFP_s.g._gland 4_set1_004.nd2	6		10-2-14_spotsxCap-H2-MBM-GFP_s.g._gland 5_set1_005.nd2	8
10-2-14_spotsxCap-H2-GFP_s.g._gland 4_set1_004.nd2	7		10-2-14_spotsxCap-H2-MBM-GFP_s.g._gland 5_set1_005.nd2	5
10-2-14_spotsxCap-H2-GFP_s.g._gland 4_set1_004.nd2	6		10-2-14_spotsxCap-H2-MBM-GFP_s.g._gland 5_set1_005.nd2	8	6.8
10-2-14_spotsxCap-H2-GFP_s.g._gland 4_set1_004.nd2	2	6	10-2-14_spotsxCap-H2-MBM-GFP_s.g._gland 3_set1_003.nd2	4
10-2-14_spotsxCap-H2-GFP_s.g._gland 2_set1_002.nd2	6		10-2-14_spotsxCap-H2-MBM-GFP_s.g._gland 3_set1_003.nd2	4
10-2-14_spotsxCap-H2-GFP_s.g._gland 2_set1_002.nd2	12		10-2-14_spotsxCap-H2-MBM-GFP_s.g._gland 3_set1_003.nd2	5
10-2-14_spotsxCap-H2-GFP_s.g._gland 2_set1_002.nd2	9		10-2-14_spotsxCap-H2-MBM-GFP_s.g._gland 3_set1_003.nd2	5
10-2-14_spotsxCap-H2-GFP_s.g._gland 2_set1_002.nd2	9		10-2-14_spotsxCap-H2-MBM-GFP_s.g._gland 3_set1_003.nd2	4	4.4
10-2-14_spotsxCap-H2-GFP_s.g._gland 2_set1_002.nd2	9	9	10-2-14_spotsxCap-H2-MBM-GFP_s.g._gland 4_set1_004.nd2	4
10-2-14_spotsxCap-H2-GFP_s.g._gland 3_set1_003.nd2	1		10-2-14_spotsxCap-H2-MBM-GFP_s.g._gland 4_set1_004.nd2	1
10-2-14_spotsxCap-H2-GFP_s.g._gland 3_set1_003.nd2	3		10-2-14_spotsxCap-H2-MBM-GFP_s.g._gland 4_set1_004.nd2	3
10-2-14_spotsxCap-H2-GFP_s.g._gland 3_set1_003.nd2	2		10-2-14_spotsxCap-H2-MBM-GFP_s.g._gland 4_set1_004.nd2	3
10-2-14_spotsxCap-H2-GFP_s.g._gland 3_set1_003.nd2	2		10-2-14_spotsxCap-H2-MBM-GFP_s.g._gland 4_set1_004.nd2	1	2.4
10-2-14_spotsxCap-H2-GFP_s.g._gland 3_set1_003.nd2	1	1.8	10-2-14_spotsxCap-H2-MBM-GFP_s.g._gland 1_set1_001.nd2	4
			10-2-14_spotsxCap-H2-MBM-GFP_s.g._gland 1_set1_001.nd2	3
Replicate 2			10-2-14_spotsxCap-H2-MBM-GFP_s.g._gland 1_set1_001.nd2	2
10-28-14_spotsxCap-H2_s.g._gland 3_set2_004.nd2	5		10-2-14_spotsxCap-H2-MBM-GFP_s.g._gland 1_set1_001.nd2	3
10-28-14_spotsxCap-H2_s.g._gland 3_set2_004.nd2	9		10-2-14_spotsxCap-H2-MBM-GFP_s.g._gland 1_set1_001.nd2	4	3.2
10-28-14_spotsxCap-H2_s.g._gland 3_set2_004.nd2	12
10-28-14_spotsxCap-H2_s.g._gland 3_set2_004.nd2	8
10-28-14_spotsxCap-H2_s.g._gland 3_set2_004.nd2	8	8.4	10-28-14_spotsxCap-H2-MBM0-GPF_s.g._gland 1_set2_007.nd2	1
10-28-14_spotsxCap-H2_s.g._gland 2_set2_003.nd2	14		10-28-14_spotsxCap-H2-MBM0-GPF_s.g._gland 1_set2_007.nd2	4
10-28-14_spotsxCap-H2_s.g._gland 2_set2_003.nd2	10		10-28-14_spotsxCap-H2-MBM0-GPF_s.g._gland 1_set2_007.nd2	3
10-28-14_spotsxCap-H2_s.g._gland 2_set2_003.nd2	10		10-28-14_spotsxCap-H2-MBM0-GPF_s.g._gland 1_set2_007.nd2	1
10-28-14_spotsxCap-H2_s.g._gland 2_set2_003.nd2	11		10-28-14_spotsxCap-H2-MBM0-GPF_s.g._gland 1_set2_007.nd2	4	2.6
10-28-14_spotsxCap-H2_s.g._gland 2_set2_003.nd2	8	10.6	10-28-14_spotsxCap-H2-MBM0-GPF_s.g._gland 2_set2_008.nd2	2
10-28-14_spotsxCap-H2_s.g._gland 1_set1_001.nd2	1		10-28-14_spotsxCap-H2-MBM0-GPF_s.g._gland 2_set2_008.nd2	1
10-28-14_spotsxCap-H2_s.g._gland 1_set1_001.nd2	6		10-28-14_spotsxCap-H2-MBM0-GPF_s.g._gland 2_set2_008.nd2	3
10-28-14_spotsxCap-H2_s.g._gland 1_set1_001.nd2	3		10-28-14_spotsxCap-H2-MBM0-GPF_s.g._gland 2_set2_008.nd2	2
10-28-14_spotsxCap-H2_s.g._gland 1_set1_001.nd2	6		10-28-14_spotsxCap-H2-MBM0-GPF_s.g._gland 2_set2_008.nd2	4	2.4
10-28-14_spotsxCap-H2_s.g._gland 1_set1_001.nd2	1	3.4	10-28-14_spotsxCap-H2-MBM0-GPF_s.g._gland 3_set2_009.nd2	3
10-28-14_spotsxCap-H2_s.g._gland 5_set2_006.nd2	9		10-28-14_spotsxCap-H2-MBM0-GPF_s.g._gland 3_set2_009.nd2	3
10-28-14_spotsxCap-H2_s.g._gland 5_set2_006.nd2	9		10-28-14_spotsxCap-H2-MBM0-GPF_s.g._gland 3_set2_009.nd2	4
10-28-14_spotsxCap-H2_s.g._gland 5_set2_006.nd2	5		10-28-14_spotsxCap-H2-MBM0-GPF_s.g._gland 3_set2_009.nd2	5
10-28-14_spotsxCap-H2_s.g._gland 5_set2_006.nd2	2		10-28-14_spotsxCap-H2-MBM0-GPF_s.g._gland 3_set2_009.nd2	2	3.4
10-28-14_spotsxCap-H2_s.g._gland 5_set2_006.nd2	7	6.4	10-28-14_spotsxCap-H2-MBM0-GPF_s.g._gland 4_set2_010.nd2	1
10-28-14_spotsxCap-H2_s.g._gland 4_set2_005.nd2	7		10-28-14_spotsxCap-H2-MBM0-GPF_s.g._gland 4_set2_010.nd2	3
10-28-14_spotsxCap-H2_s.g._gland 4_set2_005.nd2	6		10-28-14_spotsxCap-H2-MBM0-GPF_s.g._gland 4_set2_010.nd2	2
10-28-14_spotsxCap-H2_s.g._gland 4_set2_005.nd2	7		10-28-14_spotsxCap-H2-MBM0-GPF_s.g._gland 4_set2_010.nd2	1
10-28-14_spotsxCap-H2_s.g._gland 4_set2_005.nd2	11		10-28-14_spotsxCap-H2-MBM0-GPF_s.g._gland 4_set2_010.nd2	1	1.6
10-28-14_spotsxCap-H2_s.g._gland 4_set2_005.nd2	1	6.4	10-28-14_spotsxCap-H2-MBM0-GPF_s.g._gland 4_set2_011.nd2	7
			10-28-14_spotsxCap-H2-MBM0-GPF_s.g._gland 4_set2_011.nd2	8
		Average	10-28-14_spotsxCap-H2-MBM0-GPF_s.g._gland 4_set2_011.nd2	1
		6.5	10-28-14_spotsxCap-H2-MBM0-GPF_s.g._gland 4_set2_011.nd2	4
			10-28-14_spotsxCap-H2-MBM0-GPF_s.g._gland 4_set2_011.nd2	5	5
					Average
					3.5

## Sheet: Figure S5 compact. measurements
pMT-EGFP	2L1-2L2 distance (um)	pMT-Cap-H2-EGFP	2L1-2L2 distance (um)	pMT-Cap-H2-MBM-EGFP	2L1-2L2 distance (um)	pMT-Cap-H2-dC23-EGFP	2L1-2L2 distance (um)	pMT-Cap-H2-MBM-dC23-EGFP	2L1-2L2 distance (um)
Source	Length xyz (um)	Source	Length xyz	Source	Length xyz	Source	Length xyz	Source	Length xyz
11-4-14_KC FISH_MBM consts_pMT-GFP_ set1_003.nd2	1.35	11-4-14_KC FISH_Cap-H2-GFP_MBM consts_pMT-GFP_ set1_001.nd2	0.77	11-4-14_KC FISH_Cap-H2-MBM-GFP_MBM consts_ set1_002.nd2	0.7	11-4-14_KC FISH_Cap-H2-dc23-GFP_MBM consts_ set1_001.nd2	0.41	11-4-14_KC FISH_Cap-H2-dc23-MBM-GFP_MBM consts_ set3_002.nd2	0.58
11-4-14_KC FISH_MBM consts_pMT-GFP_ set1_003.nd2	0.99	11-4-14_KC FISH_Cap-H2-GFP_MBM consts_pMT-GFP_ set1_001.nd2	1.06	11-4-14_KC FISH_Cap-H2-MBM-GFP_MBM consts_ set1_002.nd2	1.08	11-4-14_KC FISH_Cap-H2-dc23-GFP_MBM consts_ set1_001.nd2	1.36	11-4-14_KC FISH_Cap-H2-dc23-MBM-GFP_MBM consts_ set3_002.nd2	1.6
11-4-14_KC FISH_MBM consts_pMT-GFP_ set1_003.nd2	1.08	11-4-14_KC FISH_Cap-H2-GFP_MBM consts_pMT-GFP_ set1_001.nd2	0.88	11-4-14_KC FISH_Cap-H2-MBM-GFP_MBM consts_ set1_002.nd2	1.14	11-4-14_KC FISH_Cap-H2-dc23-GFP_MBM consts_ set1_001.nd2	1.02	11-4-14_KC FISH_Cap-H2-dc23-MBM-GFP_MBM consts_ set3_002.nd2	1.54
11-4-14_KC FISH_MBM consts_pMT-GFP_ set1_003.nd2	0.81	11-4-14_KC FISH_Cap-H2-GFP_MBM consts_pMT-GFP_ set1_001.nd2	0.79	11-4-14_KC FISH_Cap-H2-MBM-GFP_MBM consts_ set1_002.nd2	1.04	11-4-14_KC FISH_Cap-H2-dc23-GFP_MBM consts_ set1_001.nd2	0.92	11-4-14_KC FISH_Cap-H2-dc23-MBM-GFP_MBM consts_ set3_002.nd2	0.9
11-4-14_KC FISH_MBM consts_pMT-GFP_ set1_003.nd2	0.7	11-4-14_KC FISH_Cap-H2-GFP_MBM consts_pMT-GFP_ set1_001.nd2	1.56	11-4-14_KC FISH_Cap-H2-MBM-GFP_MBM consts_ set1_001.nd2	1.13	11-4-14_KC FISH_Cap-H2-dc23-GFP_MBM consts_ set1_001.nd2	0.95	11-4-14_KC FISH_Cap-H2-dc23-MBM-GFP_MBM consts_ set3_002.nd2	1.49
11-4-14_KC FISH_MBM consts_pMT-GFP_ set1_003.nd2	1.16	11-4-14_KC FISH_Cap-H2-GFP_MBM consts_pMT-GFP_ set1_001.nd2	0.59	11-4-14_KC FISH_Cap-H2-MBM-GFP_MBM consts_ set1_006.nd2	0.81	11-4-14_KC FISH_Cap-H2-dc23-GFP_MBM consts_ set1_001.nd2	1.33	11-4-14_KC FISH_Cap-H2-dc23-MBM-GFP_MBM consts_ set2_001.nd2	0.92
11-4-14_KC FISH_MBM consts_pMT-GFP_ set1_003.nd2	1.16	11-4-14_KC FISH_Cap-H2-GFP_MBM consts_pMT-GFP_ set1_001.nd2	1.32	11-4-14_KC FISH_Cap-H2-MBM-GFP_MBM consts_ set1_001.nd2	1.13	11-4-14_KC FISH_Cap-H2-dc23-GFP_MBM consts_ set1_001.nd2	1.1	11-4-14_KC FISH_Cap-H2-dc23-MBM-GFP_MBM consts_ set2_001.nd2	1.37
11-4-14_KC FISH_MBM consts_pMT-GFP_ set1_003.nd2	0.59	11-4-14_KC FISH_Cap-H2-GFP_MBM consts_pMT-GFP_ set1_001.nd2	0.88	11-4-14_KC FISH_Cap-H2-MBM-GFP_MBM consts_ set1_006.nd2	0.81	11-4-14_KC FISH_Cap-H2-dc23-GFP_MBM consts_ set1_001.nd2	1.33	11-4-14_KC FISH_Cap-H2-dc23-MBM-GFP_MBM consts_ set2_001.nd2	1.24
11-4-14_KC FISH_MBM consts_pMT-GFP_ set1_003.nd2	0.79	11-4-14_KC FISH_Cap-H2-GFP_MBM consts_pMT-GFP_ set1_001.nd2	0.79	11-4-14_KC FISH_Cap-H2-MBM-GFP_MBM consts_ set1_005.nd2	1.28	11-4-14_KC FISH_Cap-H2-dc23-GFP_MBM consts_ set1_001.nd2	1.24	11-4-14_KC FISH_Cap-H2-dc23-MBM-GFP_MBM consts_ set2_001.nd2	1.31
11-4-14_KC FISH_MBM consts_pMT-GFP_ set1_003.nd2	1.47	11-4-14_KC FISH_Cap-H2-GFP_MBM consts_pMT-GFP_ set1_001.nd2	1.32	11-4-14_KC FISH_Cap-H2-MBM-GFP_MBM consts_ set1_004.nd2	1.02	11-4-14_KC FISH_Cap-H2-dc23-GFP_MBM consts_ set1_001.nd2	0.71	11-4-14_KC FISH_Cap-H2-dc23-MBM-GFP_MBM consts_ set2_001.nd2	1.17
11-4-14_KC FISH_MBM consts_pMT-GFP_ set1_003.nd2	0.81	11-4-14_KC FISH_Cap-H2-GFP_MBM consts_pMT-GFP_ set1_001.nd2	1.22	11-4-14_KC FISH_Cap-H2-MBM-GFP_MBM consts_ set1_004.nd2	1.18	11-4-14_KC FISH_Cap-H2-dc23-GFP_MBM consts_ set1_001.nd2	0.62	11-4-14_KC FISH_Cap-H2-dc23-MBM-GFP_MBM consts_ set2_001.nd2	0.83
11-4-14_KC FISH_MBM consts_pMT-GFP_ set1_003.nd2	0.82	11-4-14_KC FISH_Cap-H2-GFP_MBM consts_pMT-GFP_ set1_001.nd2	0.7	11-4-14_KC FISH_Cap-H2-MBM-GFP_MBM consts_ set1_003.nd2	1.94	11-4-14_KC FISH_Cap-H2-dc23-GFP_MBM consts_ set1_001.nd2	0.93	11-4-14_KC FISH_Cap-H2-dc23-MBM-GFP_MBM consts_ set3_005.nd2	1.01
11-4-14_KC FISH_MBM consts_pMT-GFP_ set1_002.nd2	1.34	11-4-14_KC FISH_Cap-H2-GFP_MBM consts_pMT-GFP_ set1_001.nd2	1.22	11-4-14_KC FISH_Cap-H2-MBM-GFP_MBM consts_ set1_003.nd2	2.05	11-4-14_KC FISH_Cap-H2-dc23-GFP_MBM consts_ set1_001.nd2	0.73	11-4-14_KC FISH_Cap-H2-dc23-MBM-GFP_MBM consts_ set3_005.nd2	0.83
11-4-14_KC FISH_MBM consts_pMT-GFP_ set1_002.nd2	0.9	11-4-14_KC FISH_Cap-H2-GFP_MBM consts_pMT-GFP_ set1_001.nd2	1.24	11-4-14_KC FISH_Cap-H2-MBM-GFP_MBM consts_ set1_003.nd2	1.27	11-4-14_KC FISH_Cap-H2-dc23-GFP_MBM consts_ set1_001.nd2	0.99	11-4-14_KC FISH_Cap-H2-dc23-MBM-GFP_MBM consts_ set3_005.nd2	1.31
11-4-14_KC FISH_MBM consts_pMT-GFP_ set1_002.nd2	1.8	11-4-14_KC FISH_Cap-H2-GFP_MBM consts_pMT-GFP_ set1_001.nd2	1.01	11-4-14_KC FISH_Cap-H2-MBM-GFP_MBM consts_ set1_003.nd2	1.04	11-4-14_KC FISH_Cap-H2-dc23-GFP_MBM consts_ set1_001.nd2	1.26	11-4-14_KC FISH_Cap-H2-dc23-MBM-GFP_MBM consts_ set3_005.nd2	0.92
11-4-14_KC FISH_MBM consts_pMT-GFP_ set1_002.nd2	1.24	11-4-14_KC FISH_Cap-H2-GFP_MBM consts_pMT-GFP_ set1_001.nd2	1.05	11-4-14_KC FISH_MBM consts_Cap-H2-MBM-GFP_ 2nd_003.nd2	0.73	11-4-14_KC FISH_Cap-H2-dc23-GFP_MBM consts_ set1_001.nd2	0.62	11-4-14_KC FISH_Cap-H2-dc23-MBM-GFP_MBM consts_ set3_004.nd2	1.17
11-4-14_KC FISH_MBM consts_pMT-GFP_ set1_002.nd2	1.5	11-4-14_KC FISH_Cap-H2-GFP_MBM consts_pMT-GFP_ set1_001.nd2	0.78	11-4-14_KC FISH_MBM consts_Cap-H2-MBM-GFP_ 2nd_003.nd2	0.83	11-4-14_KC FISH_Cap-H2-dc23-GFP_MBM consts_ set1_001.nd2	1.66	11-4-14_KC FISH_Cap-H2-dc23-MBM-GFP_MBM consts_ set3_004.nd2	1.37
11-4-14_KC FISH_MBM consts_pMT-GFP_ set1_002.nd2	0.98	11-4-14_KC FISH_Cap-H2-GFP_MBM consts_pMT-GFP_ set1_001.nd2	1.26	11-4-14_KC FISH_MBM consts_Cap-H2-MBM-GFP_ 2nd_003.nd2	1.17	11-4-14_KC FISH_Cap-H2-dc23-GFP_MBM consts_ set1_001.nd2	0.41	11-4-14_KC FISH_Cap-H2-dc23-MBM-GFP_MBM consts_ set3_004.nd2	1.31
11-4-14_KC FISH_MBM consts_pMT-GFP_ set1_002.nd2	1.27	11-4-14_KC FISH_Cap-H2-GFP_MBM consts_pMT-GFP_ set1_002.nd2	1.11	11-4-14_KC FISH_MBM consts_Cap-H2-MBM-GFP_ 2nd_003.nd2	0.93	11-4-14_KC FISH_Cap-H2-dc23-GFP_MBM consts_ set1_001.nd2	0.92	11-4-14_KC FISH_Cap-H2-dc23-MBM-GFP_MBM consts_ set3_004.nd2	1.1
11-4-14_KC FISH_MBM consts_pMT-GFP_ set1_002.nd2	0.75	11-4-14_KC FISH_Cap-H2-GFP_MBM consts_pMT-GFP_ set1_002.nd2	0.99	11-4-14_KC FISH_MBM consts_Cap-H2-MBM-GFP_ 2nd_003.nd2	0.93	11-4-14_KC FISH_Cap-H2-dc23-GFP_MBM consts_ set1_004.nd2	0.41	11-4-14_KC FISH_Cap-H2-dc23-MBM-GFP_MBM consts_ set3_004.nd2	1.71
11-4-14_KC FISH_MBM consts_pMT-GFP_ set1_002.nd2	0.9	11-4-14_KC FISH_Cap-H2-GFP_MBM consts_pMT-GFP_ set1_002.nd2	1.33	11-4-14_KC FISH_MBM consts_Cap-H2-MBM-GFP_ 2nd_003.nd2	1.24	11-4-14_KC FISH_Cap-H2-dc23-GFP_MBM consts_ set1_004.nd2	0.93	11-4-14_KC FISH_Cap-H2-dc23-MBM-GFP_MBM consts_ set3_003.nd2	1.49
11-4-14_KC FISH_MBM consts_pMT-GFP_ set1_002.nd2	0.68	11-4-14_KC FISH_Cap-H2-GFP_MBM consts_pMT-GFP_ set1_002.nd2	0.54	11-4-14_KC FISH_MBM consts_Cap-H2-MBM-GFP_ 2nd_003.nd2	1.85	11-4-14_KC FISH_Cap-H2-dc23-GFP_MBM consts_ set1_004.nd2	1.32	11-4-14_KC FISH_Cap-H2-dc23-MBM-GFP_MBM consts_ set3_003.nd2	0.95
11-4-14_KC FISH_MBM consts_pMT-GFP_ set1_002.nd2	1.61	11-4-14_KC FISH_Cap-H2-GFP_MBM consts_pMT-GFP_ set1_002.nd2	1.04	11-4-14_KC FISH_MBM consts_Cap-H2-MBM-GFP_ 2nd_002.nd2	1.68	11-4-14_KC FISH_Cap-H2-dc23-GFP_MBM consts_ set1_004.nd2	1.22	11-4-14_KC FISH_MBM consts_Cap-H2-dc23-GFP_ 2nd_002.nd2	1.01
11-4-14_KC FISH_MBM consts_pMT-GFP_ set1_002.nd2	1.2	11-4-14_KC FISH_Cap-H2-GFP_MBM consts_pMT-GFP_ set1_002.nd2	0.54	11-4-14_KC FISH_MBM consts_Cap-H2-MBM-GFP_ 2nd_002.nd2	1.24	11-4-14_KC FISH_Cap-H2-dc23-GFP_MBM consts_ set1_004.nd2	1.24	11-4-14_KC FISH_MBM consts_Cap-H2-dc23-GFP_ 2nd_002.nd2	0.99
11-4-14_KC FISH_MBM consts_pMT-GFP_ set1_002.nd2	1.35	11-4-14_KC FISH_Cap-H2-GFP_MBM consts_pMT-GFP_ set1_002.nd2	1.1	11-4-14_KC FISH_MBM consts_Cap-H2-MBM-GFP_ 2nd_002.nd2	0.83	11-4-14_KC FISH_Cap-H2-dc23-GFP_MBM consts_ set1_004.nd2	1.08	11-4-14_KC FISH_MBM consts_Cap-H2-dc23-GFP_ 2nd_002.nd2	0.83
11-4-14_KC FISH_MBM consts_pMT-GFP_ set1_002.nd2	1.28	11-4-14_KC FISH_Cap-H2-GFP_MBM consts_pMT-GFP_ set1_002.nd2	0.7	11-4-14_KC FISH_MBM consts_Cap-H2-MBM-GFP_ 2nd_002.nd2	1.71	11-4-14_KC FISH_Cap-H2-dc23-GFP_MBM consts_ set1_004.nd2	0.92	11-4-14_KC FISH_MBM consts_Cap-H2-dc23-GFP_ 2nd_002.nd2	1.66
11-4-14_KC FISH_MBM consts_pMT-GFP_ set1_002.nd2	1.12	11-4-14_KC FISH_Cap-H2-GFP_MBM consts_pMT-GFP_ set1_002.nd2	0.79	11-4-14_KC FISH_MBM consts_Cap-H2-MBM-GFP_ 2nd_001.nd2	1.66	11-4-14_KC FISH_Cap-H2-dc23-GFP_MBM consts_ set1_004.nd2	0.73	11-4-14_KC FISH_MBM consts_Cap-H2-dc23-GFP_ 2nd_002.nd2	1.17
11-4-14_KC FISH_MBM consts_pMT-GFP_ set1_001.nd2	2.12	11-4-14_KC FISH_Cap-H2-GFP_MBM consts_pMT-GFP_ set1_002.nd2	1.12	11-4-14_KC FISH_MBM consts_Cap-H2-MBM-GFP_ 2nd_001.nd2	0.95	11-4-14_KC FISH_Cap-H2-dc23-GFP_MBM consts_ set1_004.nd2	1.19	11-4-14_KC FISH_MBM consts_Cap-H2-dc23-GFP_ 2nd_002.nd2	0.93
11-4-14_KC FISH_MBM consts_pMT-GFP_ set1_001.nd2	0.9	11-4-14_KC FISH_Cap-H2-GFP_MBM consts_pMT-GFP_ set1_002.nd2	1.46	11-4-14_KC FISH_MBM consts_Cap-H2-MBM-GFP_ 2nd_001.nd2	0.83	11-4-14_KC FISH_Cap-H2-dc23-GFP_MBM consts_ set1_004.nd2	0.93	11-4-14_KC FISH_MBM consts_Cap-H2-dc23-GFP_ 2nd_002.nd2	1.72
11-4-14_KC FISH_MBM consts_pMT-GFP_ set1_001.nd2	1.53	11-4-14_KC FISH_Cap-H2-GFP_MBM consts_pMT-GFP_ set1_002.nd2	1.5	11-4-14_KC FISH_MBM consts_Cap-H2-MBM-GFP_ 2nd_001.nd2	0.85	11-4-14_KC FISH_Cap-H2-dc23-GFP_MBM consts_ set1_004.nd2	0.71	11-4-14_KC FISH_MBM consts_Cap-H2-dc23-GFP_ 2nd_002.nd2	0.93
11-4-14_KC FISH_MBM consts_pMT-GFP_ set1_001.nd2	1.02	11-4-14_KC FISH_Cap-H2-GFP_MBM consts_pMT-GFP_ set1_002.nd2	0.79	11-4-14_KC FISH_MBM consts_Cap-H2-MBM-GFP_ 2nd_001.nd2	0.59	11-4-14_KC FISH_Cap-H2-dc23-GFP_MBM consts_ set1_004.nd2	0.73	11-4-14_KC FISH_MBM consts_Cap-H2-dc23-GFP_ 2nd_001.nd2	0.41
11-4-14_KC FISH_MBM consts_pMT-GFP_ set1_001.nd2	1.75	11-4-14_KC FISH_Cap-H2-GFP_MBM consts_pMT-GFP_ set1_002.nd2	0.81	11-4-14_KC FISH_MBM consts_Cap-H2-MBM-GFP_ 2nd_001.nd2	1.24	11-4-14_KC FISH_Cap-H2-dc23-GFP_MBM consts_ set1_003.nd2	0.73	11-4-14_KC FISH_MBM consts_Cap-H2-dc23-GFP_ 2nd_001.nd2	0.84
11-4-14_KC FISH_MBM consts_pMT-GFP_ set1_001.nd2	0.92	11-4-14_KC FISH_Cap-H2-GFP_MBM consts_pMT-GFP_ set1_002.nd2	0.7	11-4-14_KC FISH_MBM consts_Cap-H2-MBM-GFP_ 2nd_007.nd2	0.41	11-4-14_KC FISH_Cap-H2-dc23-GFP_MBM consts_ set1_003.nd2	1.08	11-4-14_KC FISH_MBM consts_Cap-H2-dc23-GFP_ 2nd_001.nd2	1.33
11-4-14_KC FISH_MBM consts_pMT-GFP_ set1_001.nd2	0.7	11-4-14_KC FISH_Cap-H2-GFP_MBM consts_pMT-GFP_ set1_002.nd2	0.53	11-4-14_KC FISH_MBM consts_Cap-H2-MBM-GFP_ 2nd_007.nd2	1.26	11-4-14_KC FISH_Cap-H2-dc23-GFP_MBM consts_ set1_003.nd2	2.3	11-4-14_KC FISH_MBM consts_Cap-H2-dc23-GFP_ 2nd_001.nd2	0.83
11-4-14_KC FISH_MBM consts_pMT-GFP_ set1_001.nd2	0.81	11-4-14_KC FISH_Cap-H2-GFP_MBM consts_pMT-GFP_ set1_002.nd2	1.8	11-4-14_KC FISH_MBM consts_Cap-H2-MBM-GFP_ 2nd_007.nd2	0.84	11-4-14_KC FISH_Cap-H2-dc23-GFP_MBM consts_ set1_003.nd2	0.62	11-4-14_KC FISH_MBM consts_Cap-H2-dc23-GFP_ 2nd_001.nd2	0.93
11-4-14_KC FISH_MBM consts_pMT-GFP_ set1_001.nd2	1.76	11-4-14_KC FISH_Cap-H2-GFP_MBM consts_pMT-GFP_ set1_002.nd2	0.77	11-4-14_KC FISH_MBM consts_Cap-H2-MBM-GFP_ 2nd_007.nd2	1.17	11-4-14_KC FISH_Cap-H2-dc23-GFP_MBM consts_ set1_003.nd2	0.99	11-4-14_KC FISH_MBM consts_Cap-H2-dc23-GFP_ 2nd_001.nd2	0.62
11-4-14_KC FISH_MBM consts_pMT-GFP_ set1_001.nd2	1.38	11-4-14_KC FISH_Cap-H2-GFP_MBM consts_pMT-GFP_ set1_003.nd2	0.75	11-4-14_KC FISH_MBM consts_Cap-H2-MBM-GFP_ 2nd_007.nd2	1.46	11-4-14_KC FISH_Cap-H2-dc23-GFP_MBM consts_ set1_003.nd2	1.1	11-4-14_KC FISH_MBM consts_Cap-H2-dc23-GFP_ 2nd_001.nd2	1.61
11-4-14_KC FISH_MBM consts_pMT-GFP_ 2nd_003.nd2	1.01	11-4-14_KC FISH_Cap-H2-GFP_MBM consts_pMT-GFP_ set1_003.nd2	0.59	11-4-14_KC FISH_MBM consts_Cap-H2-MBM-GFP_ 2nd_007.nd2	0.92	11-4-14_KC FISH_Cap-H2-dc23-GFP_MBM consts_ set1_003.nd2	0.93	11-4-14_KC FISH_MBM consts_Cap-H2-dc23-GFP_ 2nd_005.nd2	1.31
11-4-14_KC FISH_MBM consts_pMT-GFP_ 2nd_003.nd2	1.24	11-4-14_KC FISH_Cap-H2-GFP_MBM consts_pMT-GFP_ set1_003.nd2	0.59	11-4-14_KC FISH_MBM consts_Cap-H2-MBM-GFP_ 2nd_007.nd2	0.84	11-4-14_KC FISH_Cap-H2-dc23-GFP_MBM consts_ set1_003.nd2	1.02	11-4-14_KC FISH_MBM consts_Cap-H2-dc23-GFP_ 2nd_005.nd2	0.83
11-4-14_KC FISH_MBM consts_pMT-GFP_ 2nd_003.nd2	2.11	11-4-14_KC FISH_Cap-H2-GFP_MBM consts_pMT-GFP_ set1_003.nd2	1.11	11-4-14_KC FISH_MBM consts_Cap-H2-MBM-GFP_ 2nd_006.nd2	0.93	11-4-14_KC FISH_Cap-H2-dc23-GFP_MBM consts_ set1_003.nd2	0.58	11-4-14_KC FISH_MBM consts_Cap-H2-dc23-GFP_ 2nd_005.nd2	1.76
11-4-14_KC FISH_MBM consts_pMT-GFP_ 2nd_003.nd2	1.17	11-4-14_KC FISH_Cap-H2-GFP_MBM consts_pMT-GFP_ set1_003.nd2	1.12	11-4-14_KC FISH_MBM consts_Cap-H2-MBM-GFP_ 2nd_006.nd2	1.22	11-4-14_KC FISH_Cap-H2-dc23-GFP_MBM consts_ set1_003.nd2	0.93	11-4-14_KC FISH_MBM consts_Cap-H2-dc23-GFP_ 2nd_005.nd2	1.01
11-4-14_KC FISH_MBM consts_pMT-GFP_ 2nd_003.nd2	0.93	11-4-14_KC FISH_Cap-H2-GFP_MBM consts_pMT-GFP_ set1_003.nd2	0.92	11-4-14_KC FISH_MBM consts_Cap-H2-MBM-GFP_ 2nd_006.nd2	1.49	11-4-14_KC FISH_Cap-H2-dc23-GFP_MBM consts_ set1_003.nd2	0.73	11-4-14_KC FISH_MBM consts_Cap-H2-dc23-GFP_ 2nd_005.nd2	0.85
11-4-14_KC FISH_MBM consts_pMT-GFP_ 2nd_003.nd2	0.85	11-4-14_KC FISH_Cap-H2-GFP_MBM consts_pMT-GFP_ set1_003.nd2	0.81	11-4-14_KC FISH_MBM consts_Cap-H2-MBM-GFP_ 2nd_006.nd2	1.01	11-4-14_KC FISH_Cap-H2-dc23-GFP_MBM consts_ set1_003.nd2	1.1	11-4-14_KC FISH_MBM consts_Cap-H2-dc23-GFP_ 2nd_005.nd2	1.19
11-4-14_KC FISH_MBM consts_pMT-GFP_ 2nd_003.nd2	1.24	11-4-14_KC FISH_Cap-H2-GFP_MBM consts_pMT-GFP_ set1_003.nd2	0.35	11-4-14_KC FISH_MBM consts_Cap-H2-MBM-GFP_ 2nd_005.nd2	1.1	11-4-14_KC FISH_Cap-H2-dc23-GFP_MBM consts_ set1_002.nd2	0.71	11-4-14_KC FISH_MBM consts_Cap-H2-dc23-GFP_ 2nd_005.nd2	1.17
11-4-14_KC FISH_MBM consts_pMT-GFP_ 2nd_003.nd2	1.49	11-4-14_KC FISH_Cap-H2-GFP_MBM consts_pMT-GFP_ set1_003.nd2	1.31	11-4-14_KC FISH_MBM consts_Cap-H2-MBM-GFP_ 2nd_005.nd2	0.59	11-4-14_KC FISH_Cap-H2-dc23-GFP_MBM consts_ set1_002.nd2	1.49	11-4-14_KC FISH_MBM consts_Cap-H2-dc23-GFP_ 2nd_005.nd2	1.52
11-4-14_KC FISH_MBM consts_pMT-GFP_ 2nd_003.nd2	0.99	11-4-14_KC FISH_Cap-H2-GFP_MBM consts_pMT-GFP_ set1_003.nd2	0.85	11-4-14_KC FISH_MBM consts_Cap-H2-MBM-GFP_ 2nd_005.nd2	0.93	11-4-14_KC FISH_Cap-H2-dc23-GFP_MBM consts_ set1_002.nd2	0.84	11-4-14_KC FISH_MBM consts_Cap-H2-dc23-GFP_ 2nd_005.nd2	1.42
11-4-14_KC FISH_MBM consts_pMT-GFP_ 2nd_003.nd2	0.83	11-4-14_KC FISH_Cap-H2-GFP_MBM consts_pMT-GFP_ set1_003.nd2	0.99	11-4-14_KC FISH_MBM consts_Cap-H2-MBM-GFP_ 2nd_005.nd2	0.83	11-4-14_KC FISH_Cap-H2-dc23-GFP_MBM consts_ set1_002.nd2	0.85	11-4-14_KC FISH_MBM consts_Cap-H2-dc23-GFP_ 2nd_005.nd2	0.83
11-4-14_KC FISH_MBM consts_pMT-GFP_ 2nd_003.nd2	1.86	11-4-14_KC FISH_Cap-H2-GFP_MBM consts_pMT-GFP_ set1_003.nd2	0.56	11-4-14_KC FISH_MBM consts_Cap-H2-MBM-GFP_ 2nd_005.nd2	1.17	11-4-14_KC FISH_Cap-H2-dc23-GFP_MBM consts_ set1_002.nd2	0.59	11-4-14_KC FISH_MBM consts_Cap-H2-dc23-GFP_ 2nd_004.nd2	1.49
11-4-14_KC FISH_MBM consts_pMT-GFP_ 2nd_003.nd2	1.71	11-4-14_KC FISH_Cap-H2-GFP_MBM consts_pMT-GFP_ set1_003.nd2	0.73	11-4-14_KC FISH_MBM consts_Cap-H2-MBM-GFP_ 2nd_005.nd2	0.83	11-4-14_KC FISH_Cap-H2-dc23-GFP_MBM consts_ set1_002.nd2	0.92	11-4-14_KC FISH_MBM consts_Cap-H2-dc23-GFP_ 2nd_004.nd2	2.11
11-4-14_KC FISH_MBM consts_pMT-GFP_ 2nd_003.nd2	1.24	11-4-14_KC FISH_Cap-H2-GFP_MBM consts_pMT-GFP_ set1_003.nd2	1.08	11-4-14_KC FISH_MBM consts_Cap-H2-MBM-GFP_ 2nd_005.nd2	0.71	11-4-14_KC FISH_Cap-H2-dc23-GFP_MBM consts_ set1_002.nd2	1.3	11-4-14_KC FISH_MBM consts_Cap-H2-dc23-GFP_ 2nd_004.nd2	0.73
11-4-14_KC FISH_MBM consts_pMT-GFP_ 2nd_002.nd2	0.62	11-4-14_KC FISH_Cap-H2-GFP_MBM consts_pMT-GFP_ set1_003.nd2	0.75	11-4-14_KC FISH_MBM consts_Cap-H2-MBM-GFP_ 2nd_005.nd2	1.31	11-4-14_KC FISH_Cap-H2-dc23-GFP_MBM consts_ set1_002.nd2	1.71	11-4-14_KC FISH_MBM consts_Cap-H2-dc23-GFP_ 2nd_004.nd2	1.76
11-4-14_KC FISH_MBM consts_pMT-GFP_ 2nd_002.nd2	1.19	11-4-14_KC FISH_MBM consts_Cap-H2-GFP_ 2nd_001.nd2	1.61	11-4-14_KC FISH_MBM consts_Cap-H2-MBM-GFP_ 2nd_004.nd2	1.85	11-4-14_KC FISH_Cap-H2-dc23-GFP_MBM consts_ set1_002.nd2	1.19	11-4-14_KC FISH_MBM consts_Cap-H2-dc23-GFP_ 2nd_004.nd2	0.93
11-4-14_KC FISH_MBM consts_pMT-GFP_ 2nd_002.nd2	1.33	11-4-14_KC FISH_MBM consts_Cap-H2-GFP_ 2nd_001.nd2	1.31	11-4-14_KC FISH_MBM consts_Cap-H2-MBM-GFP_ 2nd_004.nd2	0.41	11-4-14_KC FISH_Cap-H2-dc23-GFP_MBM consts_ set1_002.nd2	1.32	11-4-14_KC FISH_MBM consts_Cap-H2-dc23-GFP_ 2nd_004.nd2	1.26
11-4-14_KC FISH_MBM consts_pMT-GFP_ 2nd_002.nd2	1.8	11-4-14_KC FISH_MBM consts_Cap-H2-GFP_ 2nd_001.nd2	1.24	11-4-14_KC FISH_MBM consts_Cap-H2-MBM-GFP_ 2nd_004.nd2	1.67	11-4-14_KC FISH_Cap-H2-dc23-GFP_MBM consts_ set1_002.nd2	0.84	11-4-14_KC FISH_MBM consts_Cap-H2-dc23-GFP_ 2nd_004.nd2	1.24
11-4-14_KC FISH_MBM consts_pMT-GFP_ 2nd_002.nd2	0.46	11-4-14_KC FISH_MBM consts_Cap-H2-GFP_ 2nd_001.nd2	0.62	11-4-14_KC FISH_MBM consts_Cap-H2-MBM-GFP_ 2nd_004.nd2	0.95	11-4-14_KC FISH_MBM consts_Cap-H2-dc23-GFP_ 2nd_001.nd2	0.59	11-4-14_KC FISH_MBM consts_Cap-H2-dc23-GFP_ 2nd_004.nd2	1.08
11-4-14_KC FISH_MBM consts_pMT-GFP_ 2nd_002.nd2	2.08	11-4-14_KC FISH_MBM consts_Cap-H2-GFP_ 2nd_001.nd2	1.19	11-4-14_KC FISH_MBM consts_Cap-H2-MBM-GFP_ 2nd_004.nd2	0.84	11-4-14_KC FISH_MBM consts_Cap-H2-dc23-GFP_ 2nd_001.nd2	1.85	11-4-14_KC FISH_MBM consts_Cap-H2-dc23-GFP_ 2nd_004.nd2	1.02
11-4-14_KC FISH_MBM consts_pMT-GFP_ 2nd_001.nd2	0.85	11-4-14_KC FISH_MBM consts_Cap-H2-GFP_ 2nd_001.nd2	0.93	11-4-14_KC FISH_MBM consts_Cap-H2-MBM-GFP_ 2nd_004.nd2	0.95	11-4-14_KC FISH_MBM consts_Cap-H2-dc23-GFP_ 2nd_001.nd2	1.19	11-4-14_KC FISH_MBM consts_Cap-H2-dc23-GFP_ 2nd_004.nd2	1.1
11-4-14_KC FISH_MBM consts_pMT-GFP_ 2nd_001.nd2	1.67	11-4-14_KC FISH_MBM consts_Cap-H2-GFP_ 2nd_001.nd2	0.83	11-4-14_KC FISH_MBM consts_Cap-H2-MBM-GFP_ 2nd_004.nd2	1.33	11-4-14_KC FISH_MBM consts_Cap-H2-dc23-GFP_ 2nd_001.nd2	1.31	11-4-14_KC FISH_MBM consts_Cap-H2-dc23-GFP_ 2nd_003.nd2	1.26
11-4-14_KC FISH_MBM consts_pMT-GFP_ 2nd_001.nd2	1.66	11-4-14_KC FISH_MBM consts_Cap-H2-GFP_ 2nd_001.nd2	0.93	11-4-14_KC FISH_MBM consts_Cap-H2-MBM-GFP_ 2nd_004.nd2	1.31	11-4-14_KC FISH_MBM consts_Cap-H2-dc23-GFP_ 2nd_001.nd2	0.85	11-4-14_KC FISH_MBM consts_Cap-H2-dc23-GFP_ 2nd_003.nd2	0.83
11-4-14_KC FISH_MBM consts_pMT-GFP_ 2nd_001.nd2	1.66	11-4-14_KC FISH_MBM consts_Cap-H2-GFP_ 2nd_001.nd2	0.59	11-4-14_KC FISH_MBM consts_Cap-H2-MBM-GFP_ 2nd_004.nd2	1.71	11-4-14_KC FISH_MBM consts_Cap-H2-dc23-GFP_ 2nd_001.nd2	1.01	11-4-14_KC FISH_MBM consts_Cap-H2-dc23-GFP_ 2nd_003.nd2	1.01
	Average distance		Average distance		Average distance		Average distance		Average distance
	1.20883		0.963667		1.11533		1.00983		1.16067
