# Supplementary material for: Condensin II Regulates Interphase Chromatin Organization Through the Mrg-Binding Motif of Cap-H2
Source: Oxford University Press journal article supplement (doi:10.1534/g3.115.016634), 2015-03-10
Supplement: 016634_tables1.pdf [file 016634_tables1.pdf]

**Table S1. Primers used for RNAi and qPCR.**

| Gene         | Primer sequences                                                         |
|--------------|--------------------------------------------------------------------------|
| <i>RpL49</i> | 5'-CTTGGGAAATCTGTTAGTTTTAGCCAAA-3'<br>5'-T TACTGGAATCCTTTGGTTTATCTGCT-3' |
| <i>Esc</i>   | 5'-CCCGAGTTCATCACAAGAT-3'<br>5'-CTGTGTATATCCCGCGTTGAA-3'                 |
| <i>sqv</i>   | 5'- CCCGAAGTAAAACCACCAGA-3'<br>5'- ATTCTTCGTTCCGGGAATCT-3'               |
| <i>Orc2</i>  | 5'-AGTCCATGGATCAGCCAAAG-3'<br>5'- GGAAATCGCTTTCATCTCCAG-3'               |
| <i>RpL27</i> | 5'-GCACGACATCAGCTTTGAGA-3'<br>5'-CCTCCTGTAGACGGACTCG-3'                  |
